# Supplementary figures and images for: Analysis of RecA-independent recombination events between short direct repeats related to a genomic island and to a plasmid in Escherichia coli K12
Source: PeerJ journal article supplement (doi:10.7717/peerj.3293), 2017-05-09

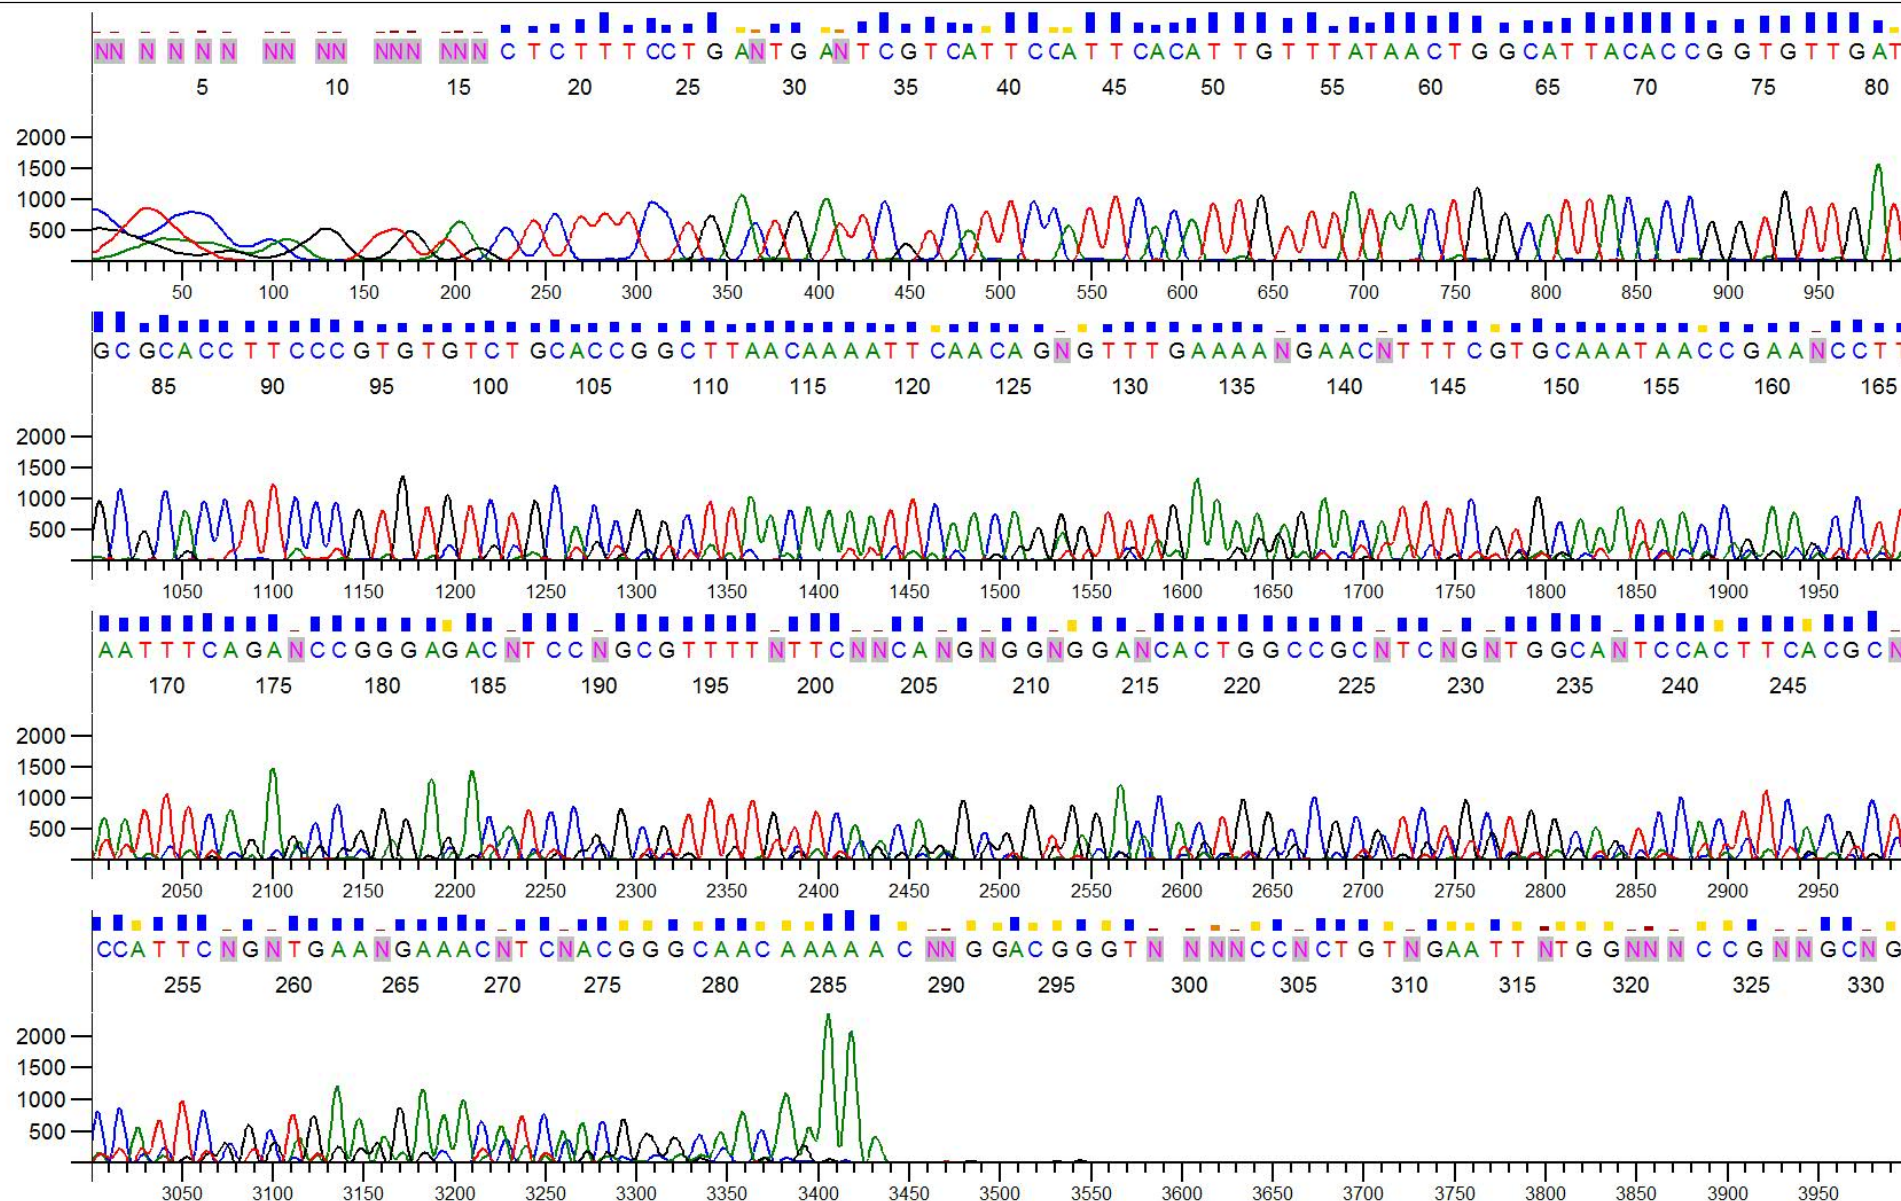

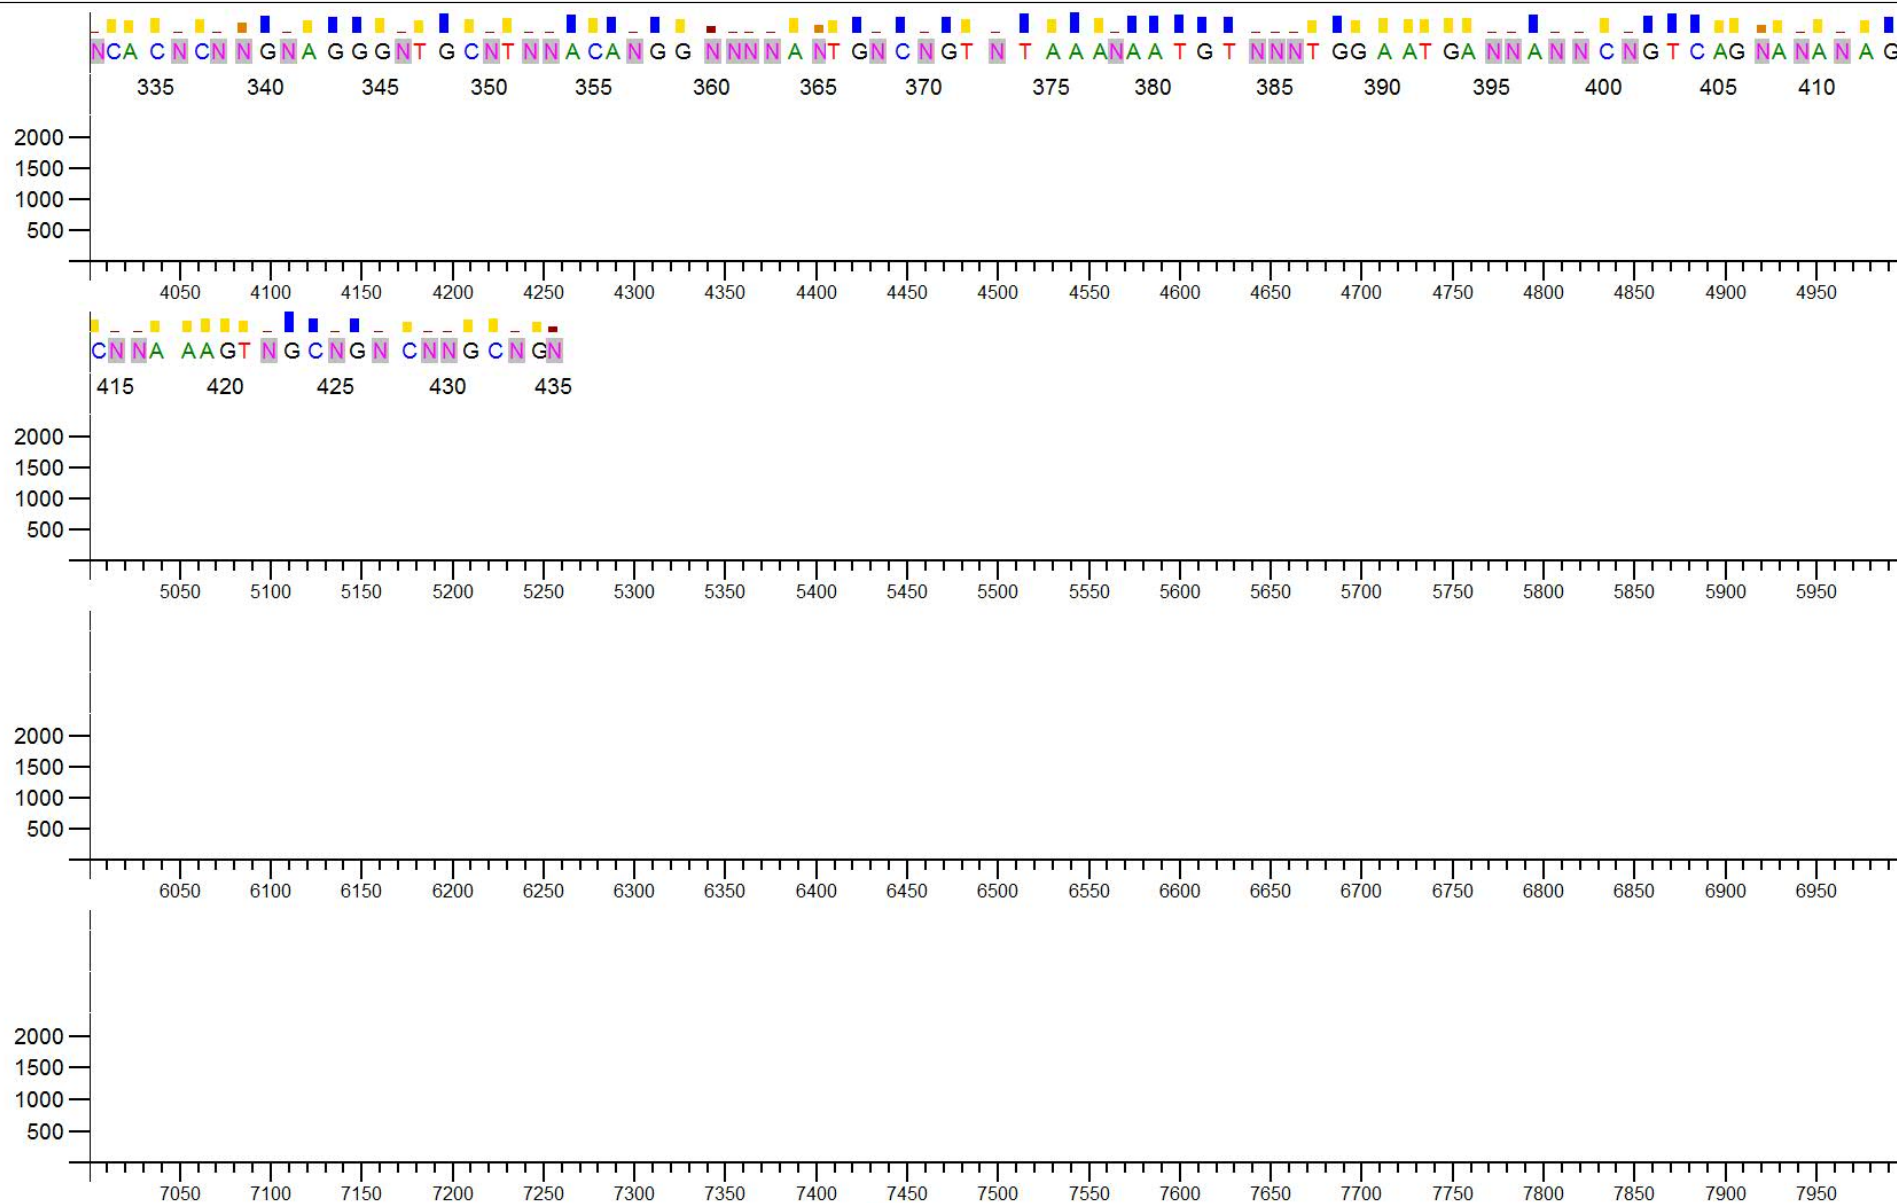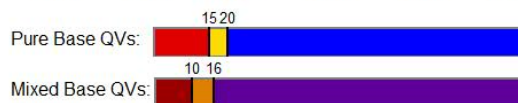

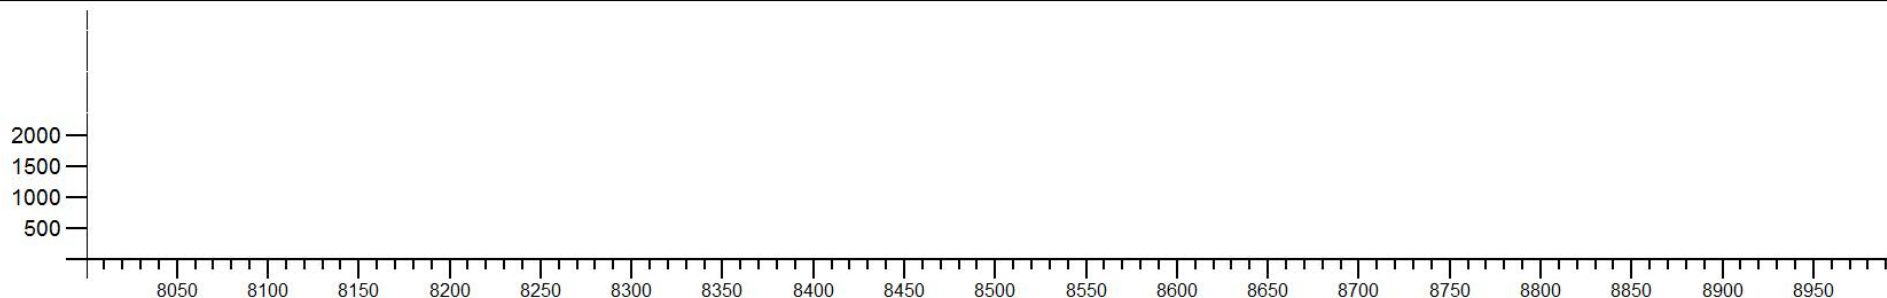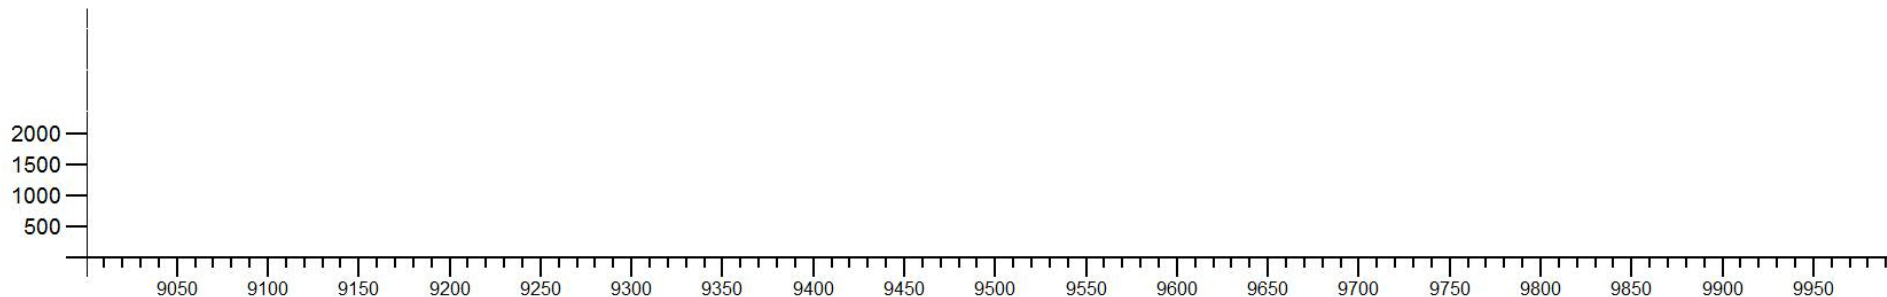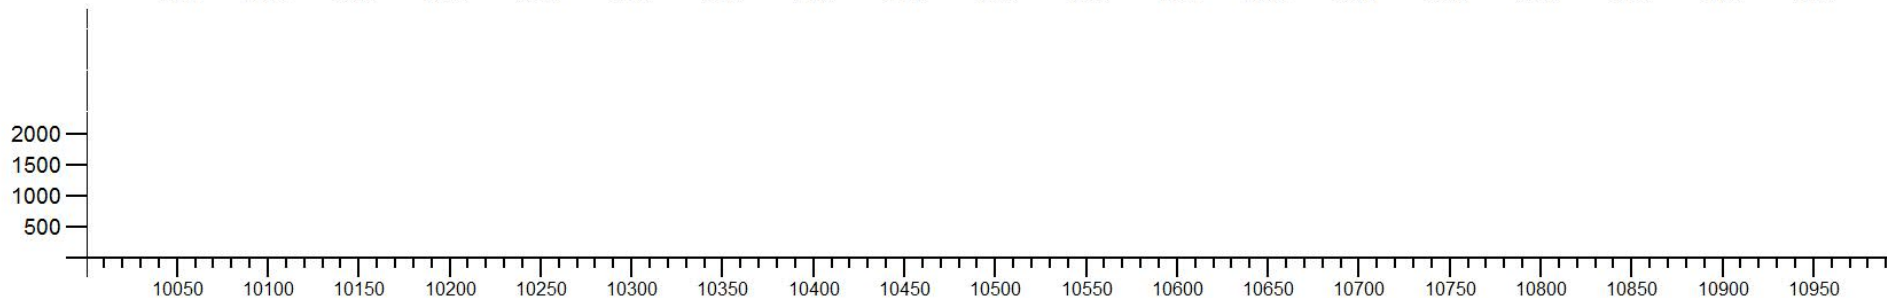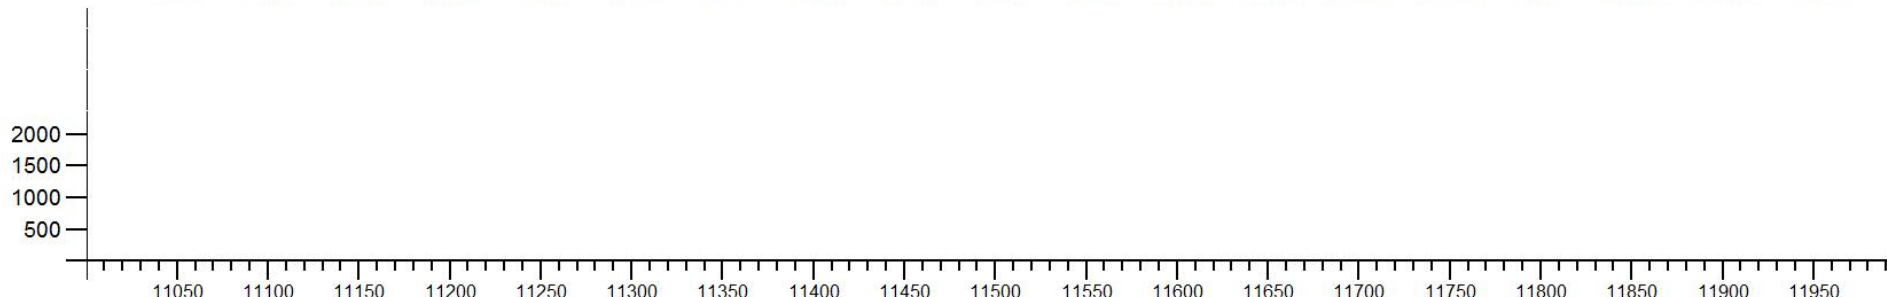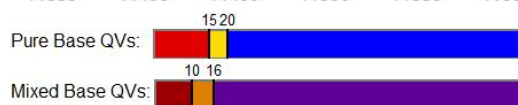

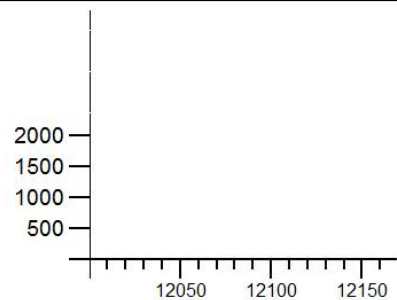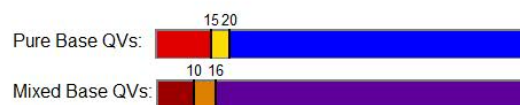

Supplement: raw_material.zip [file raw_material.zip]

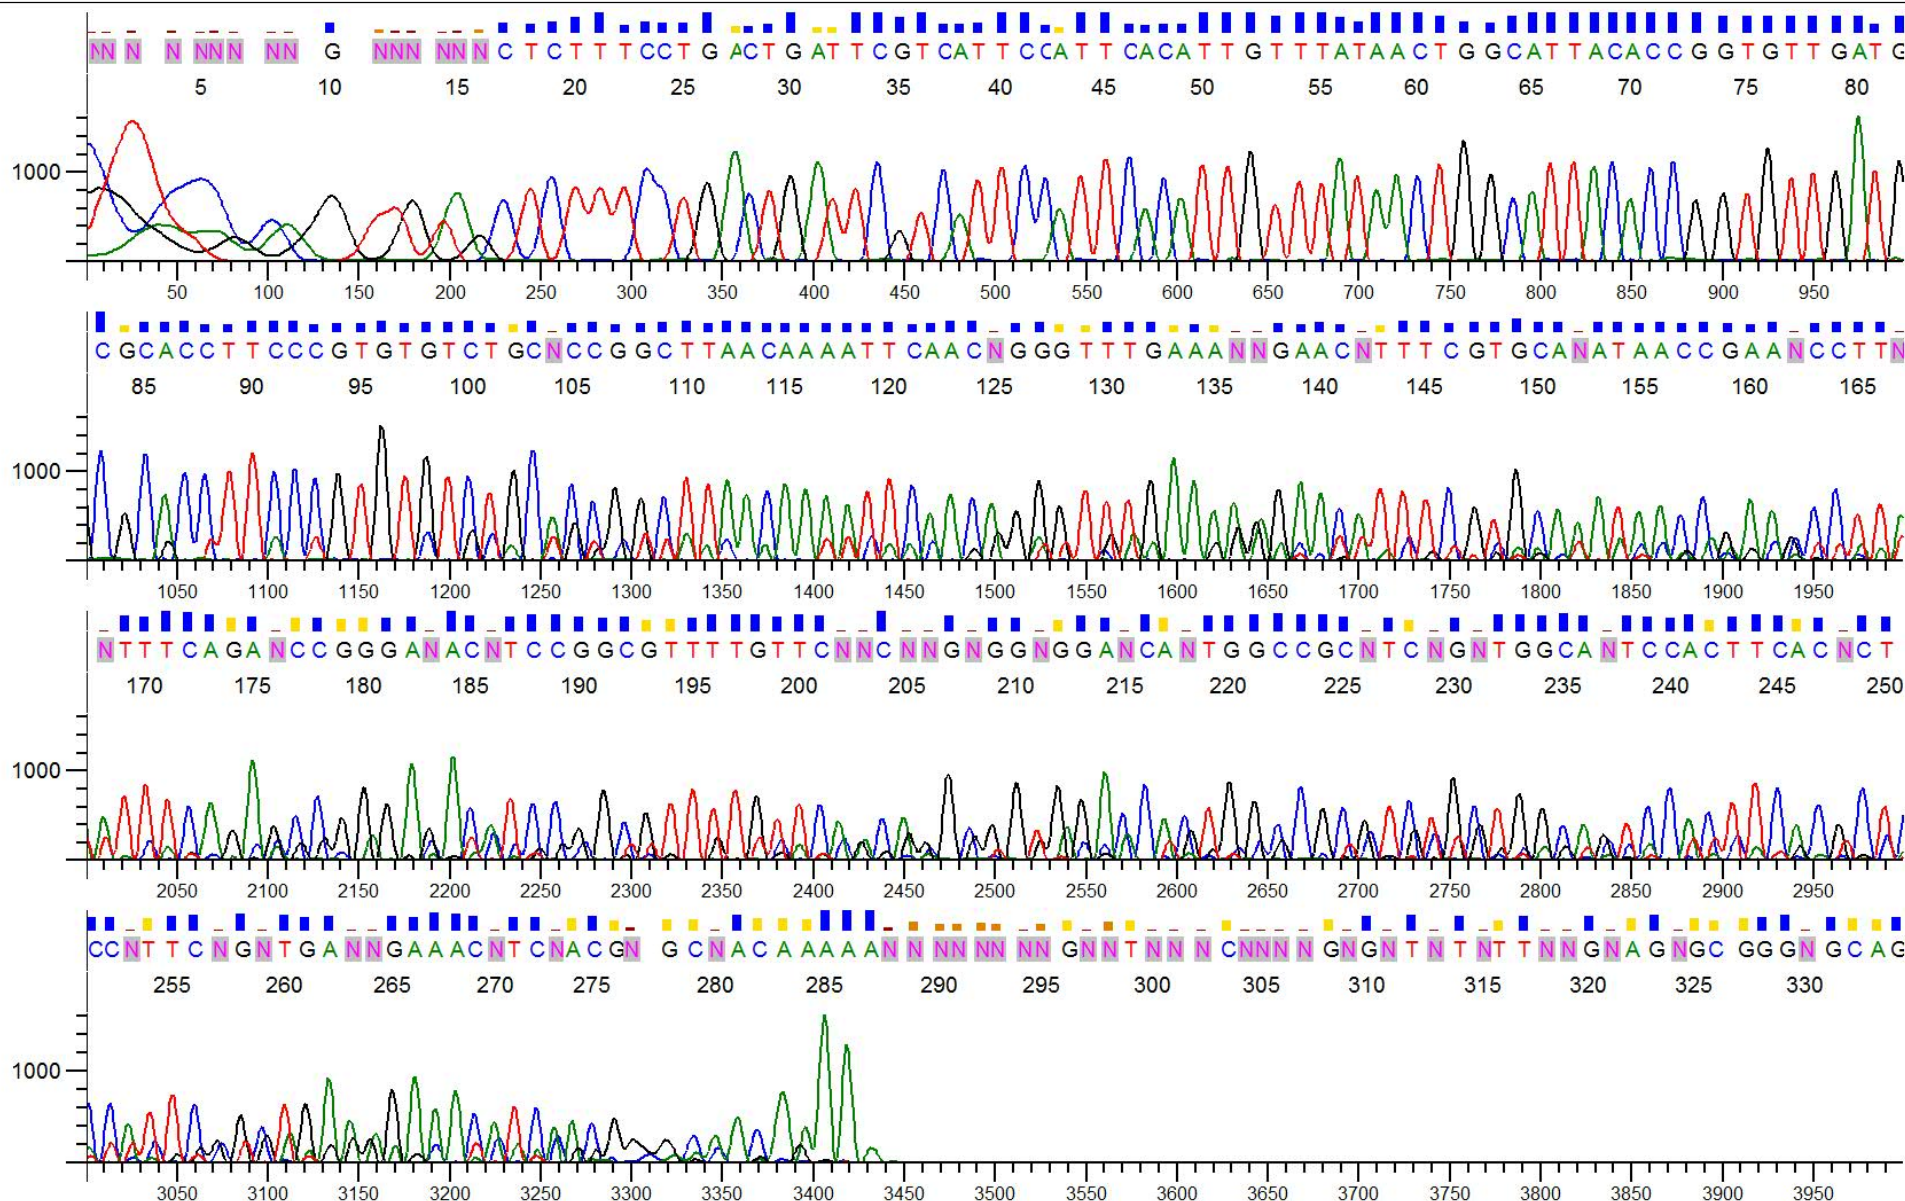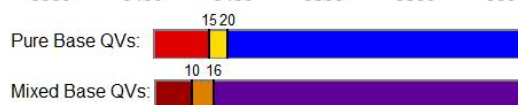

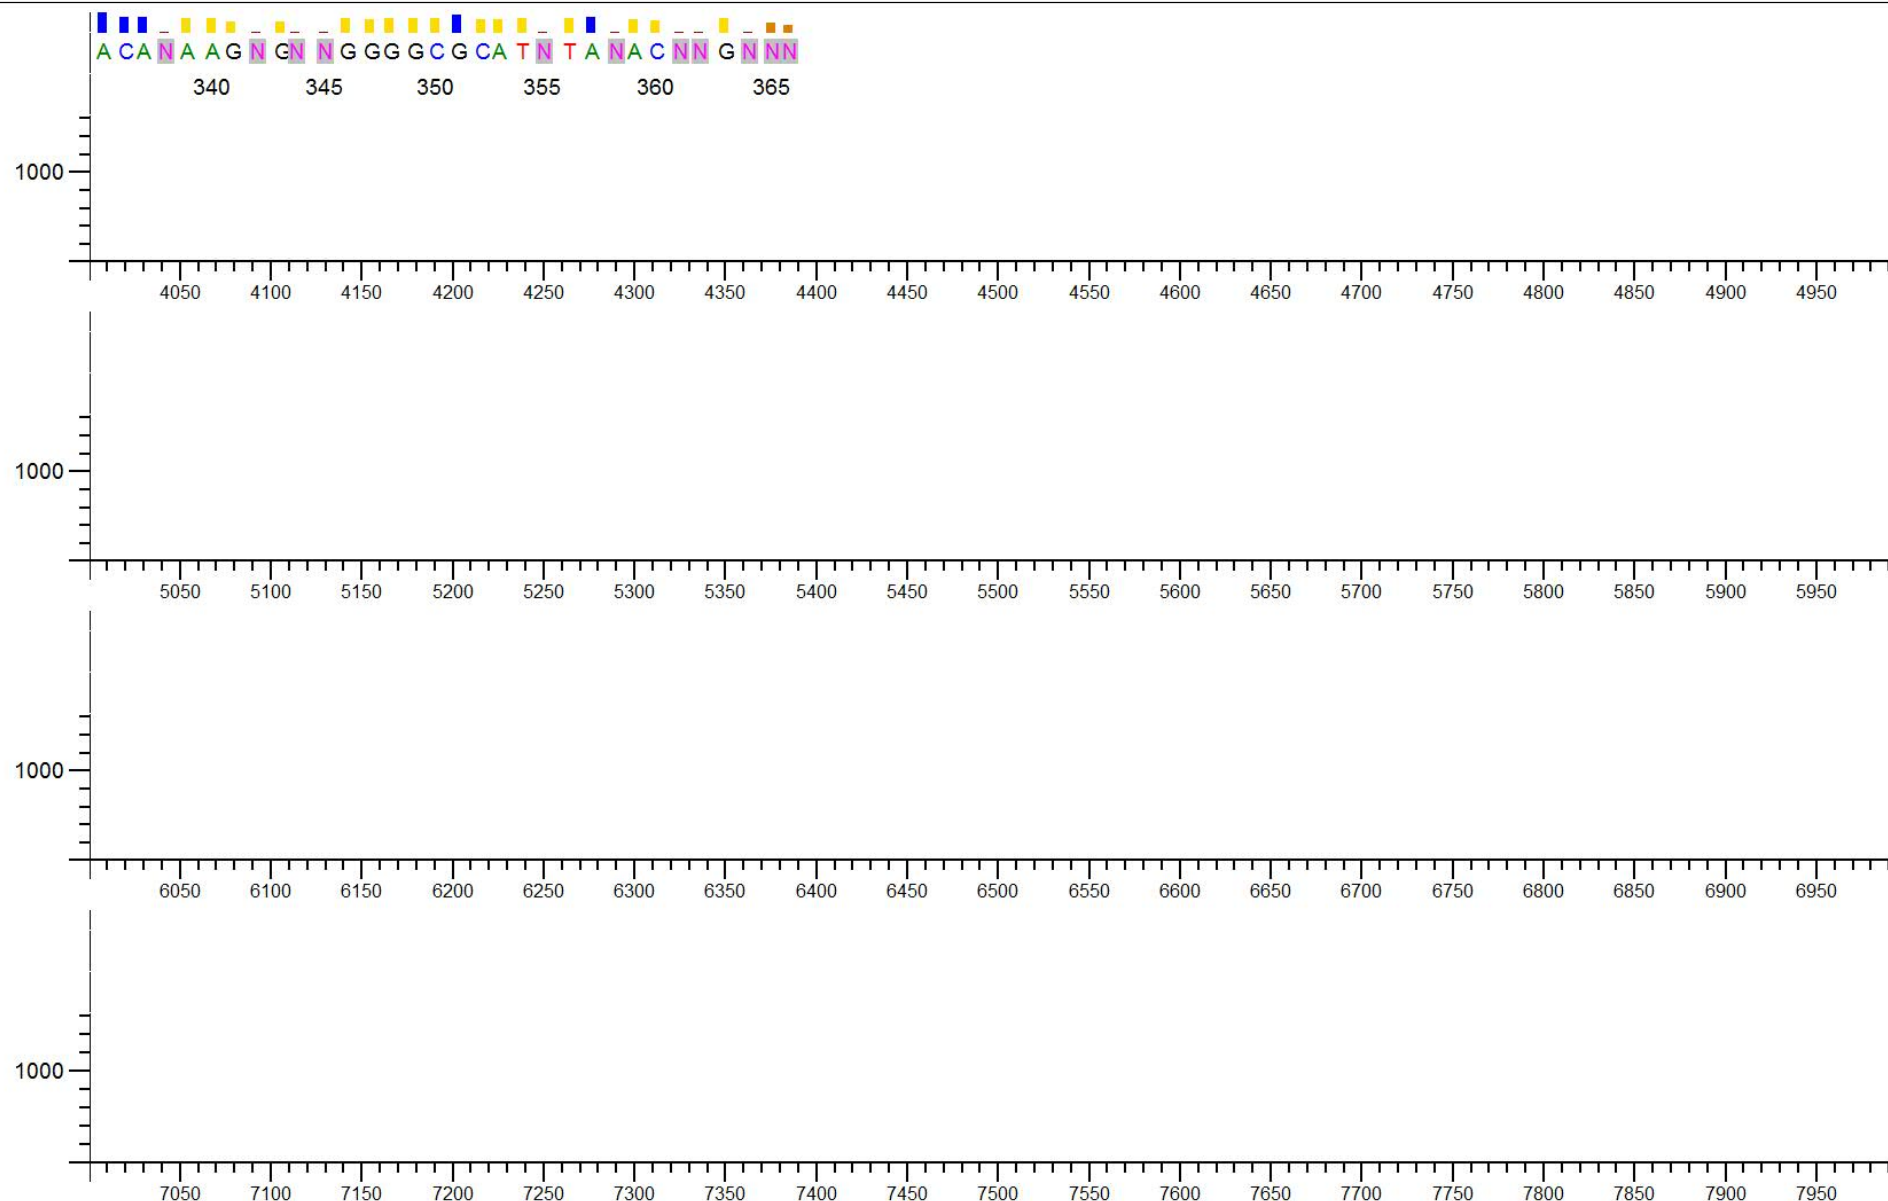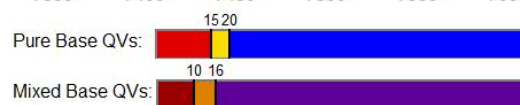

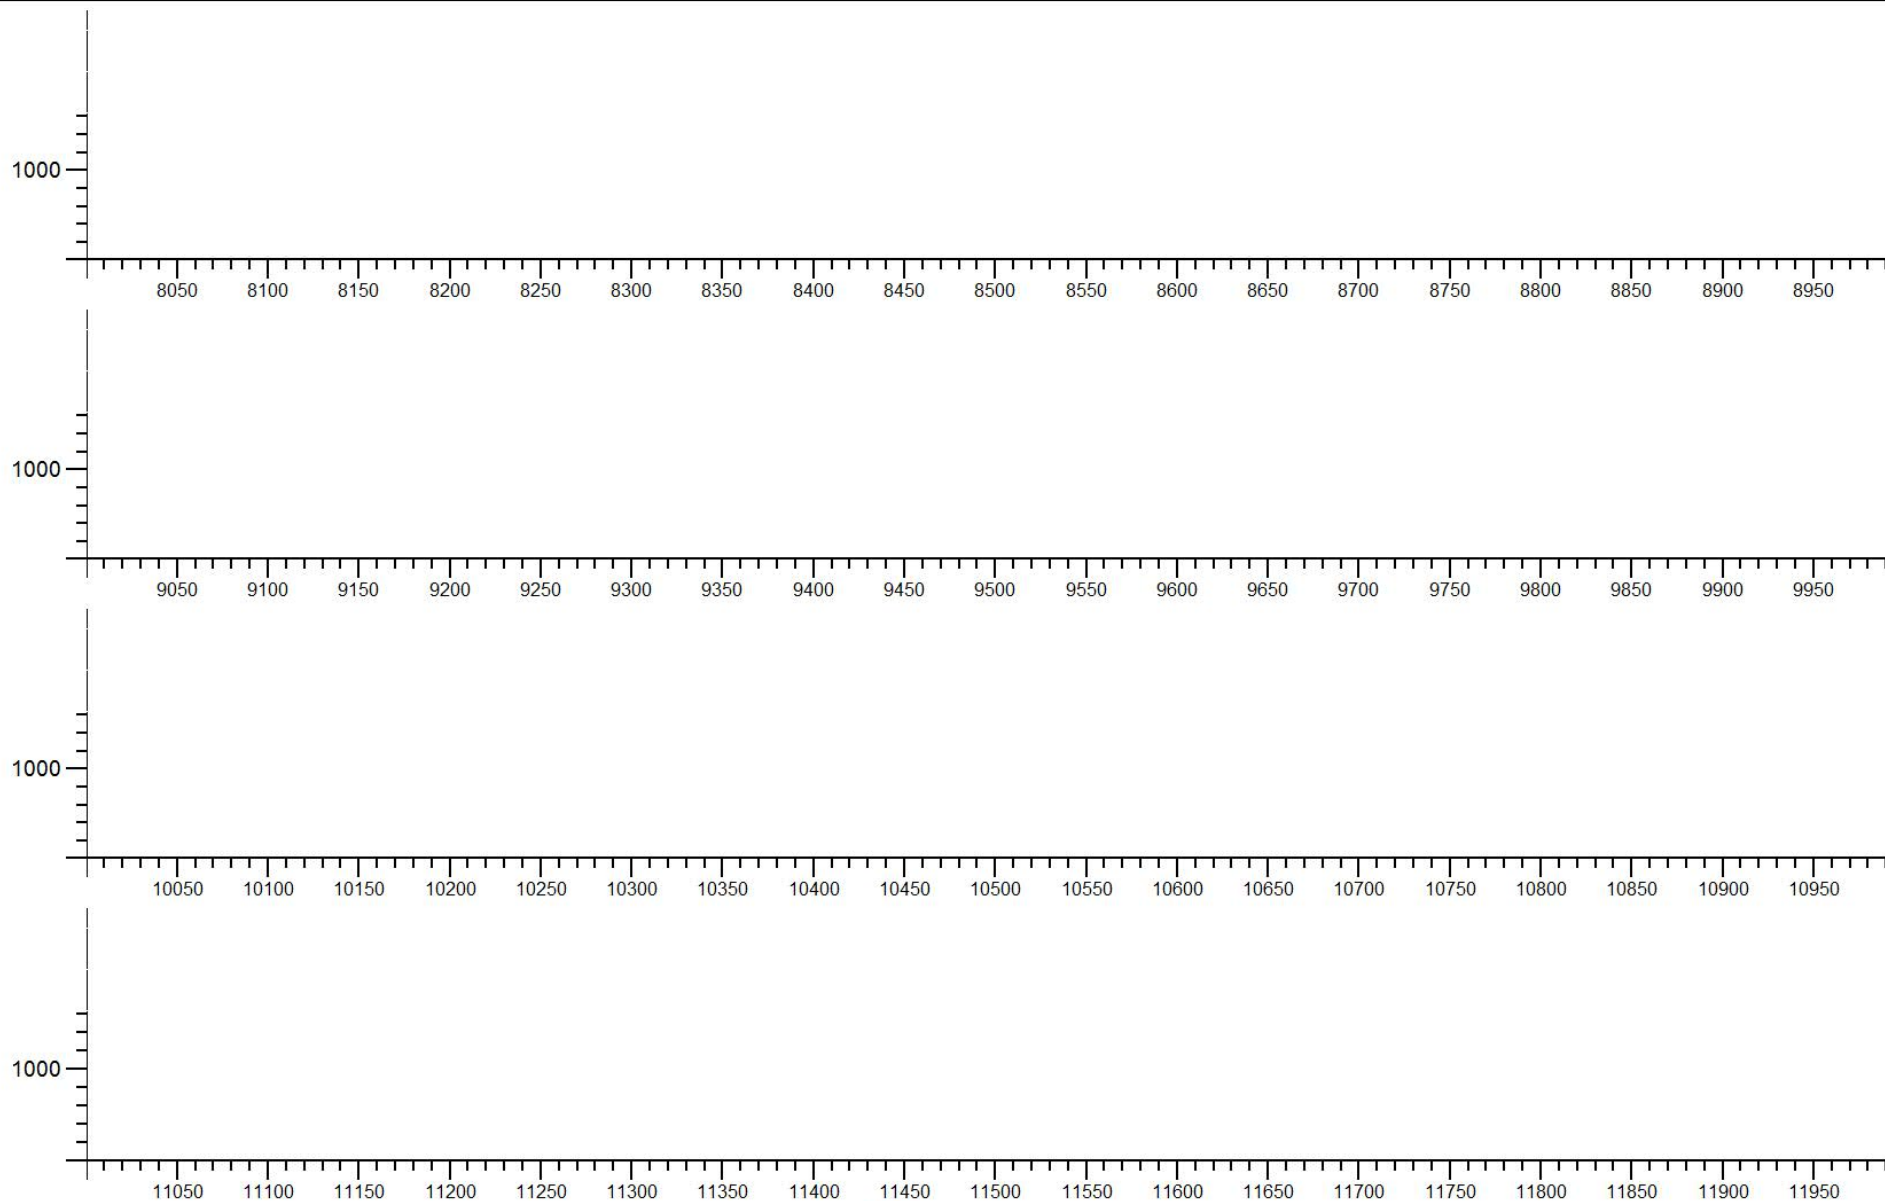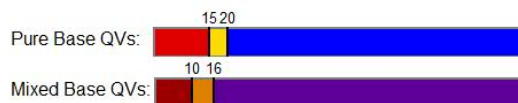

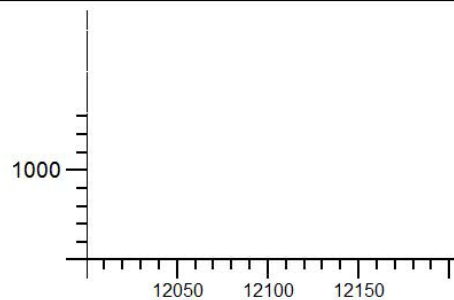

Supplement: raw_material.zip [file raw_material.zip]

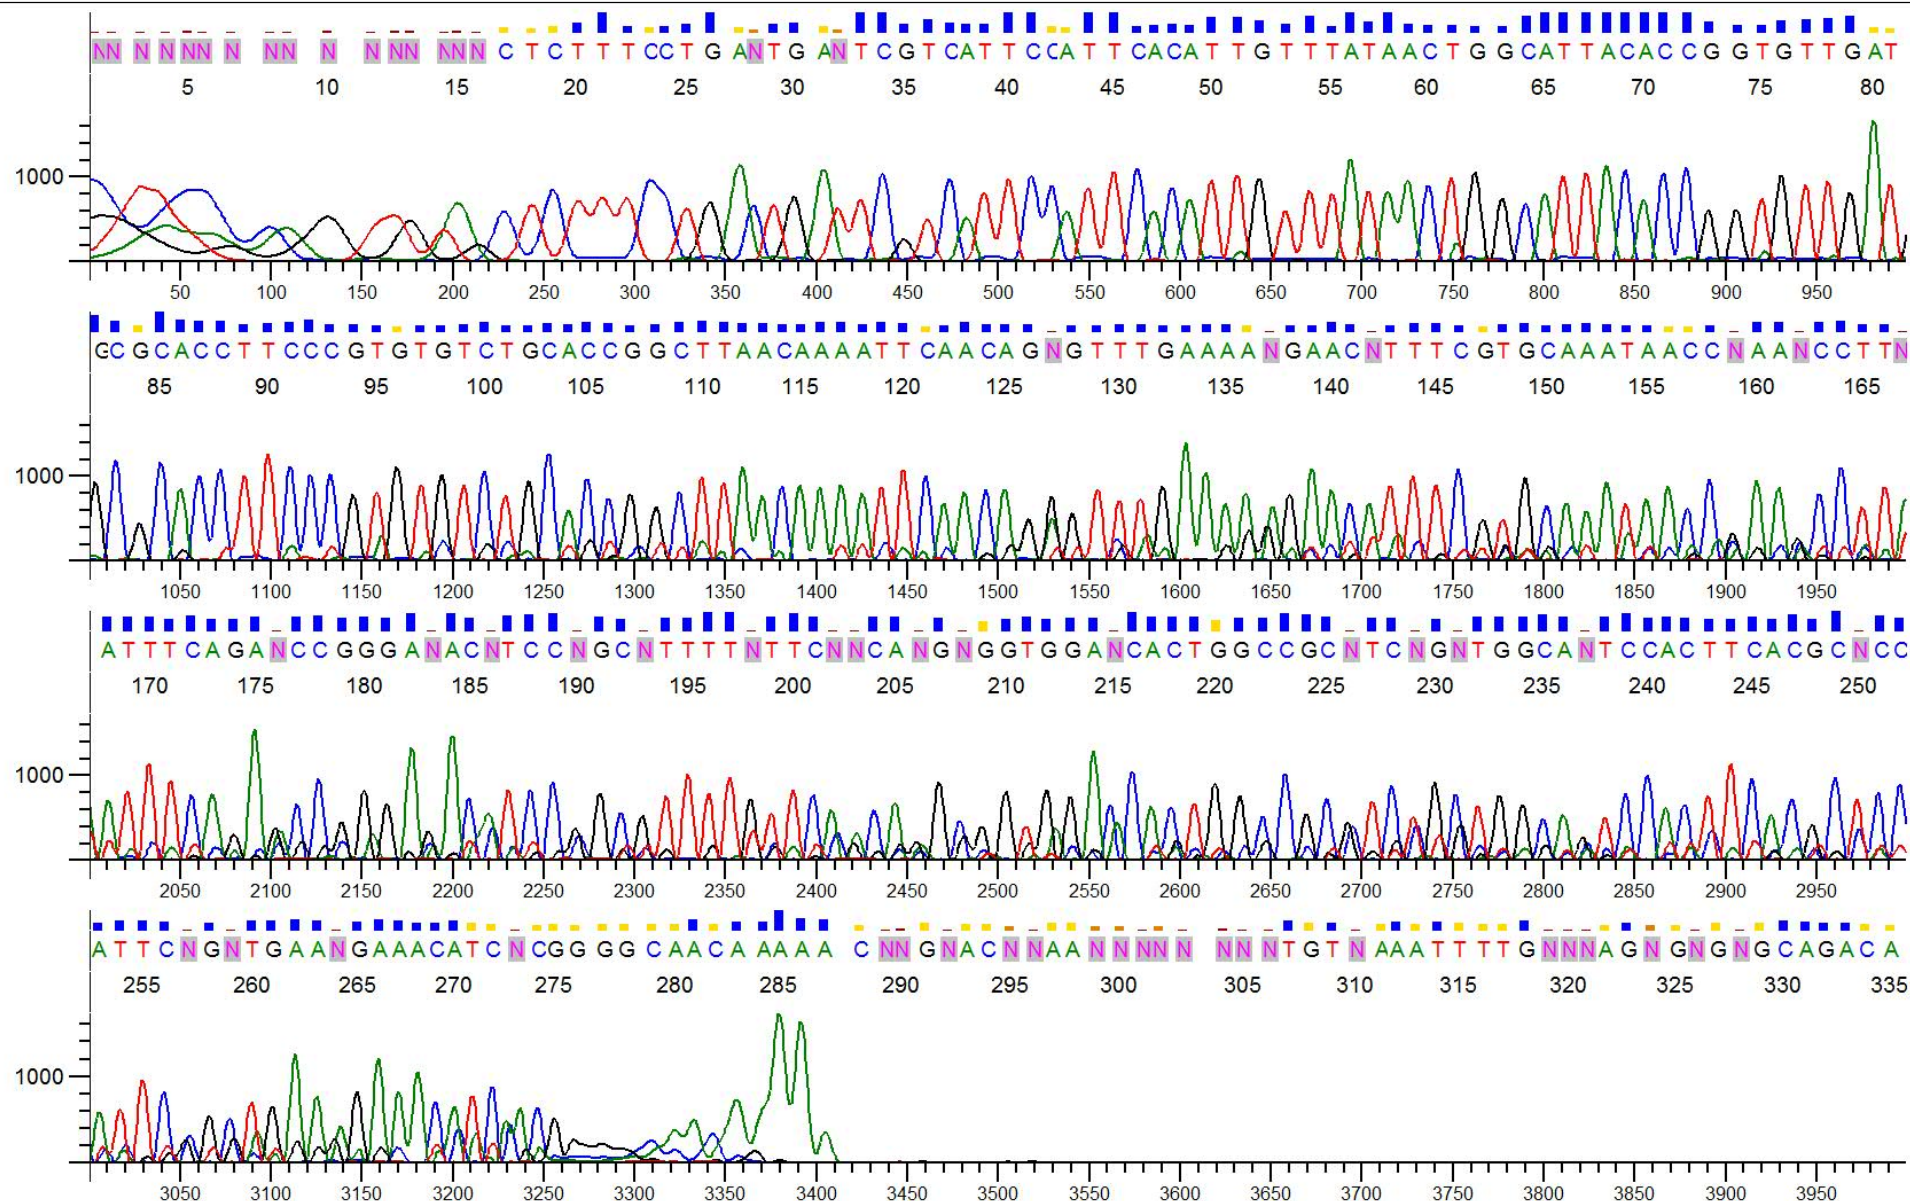

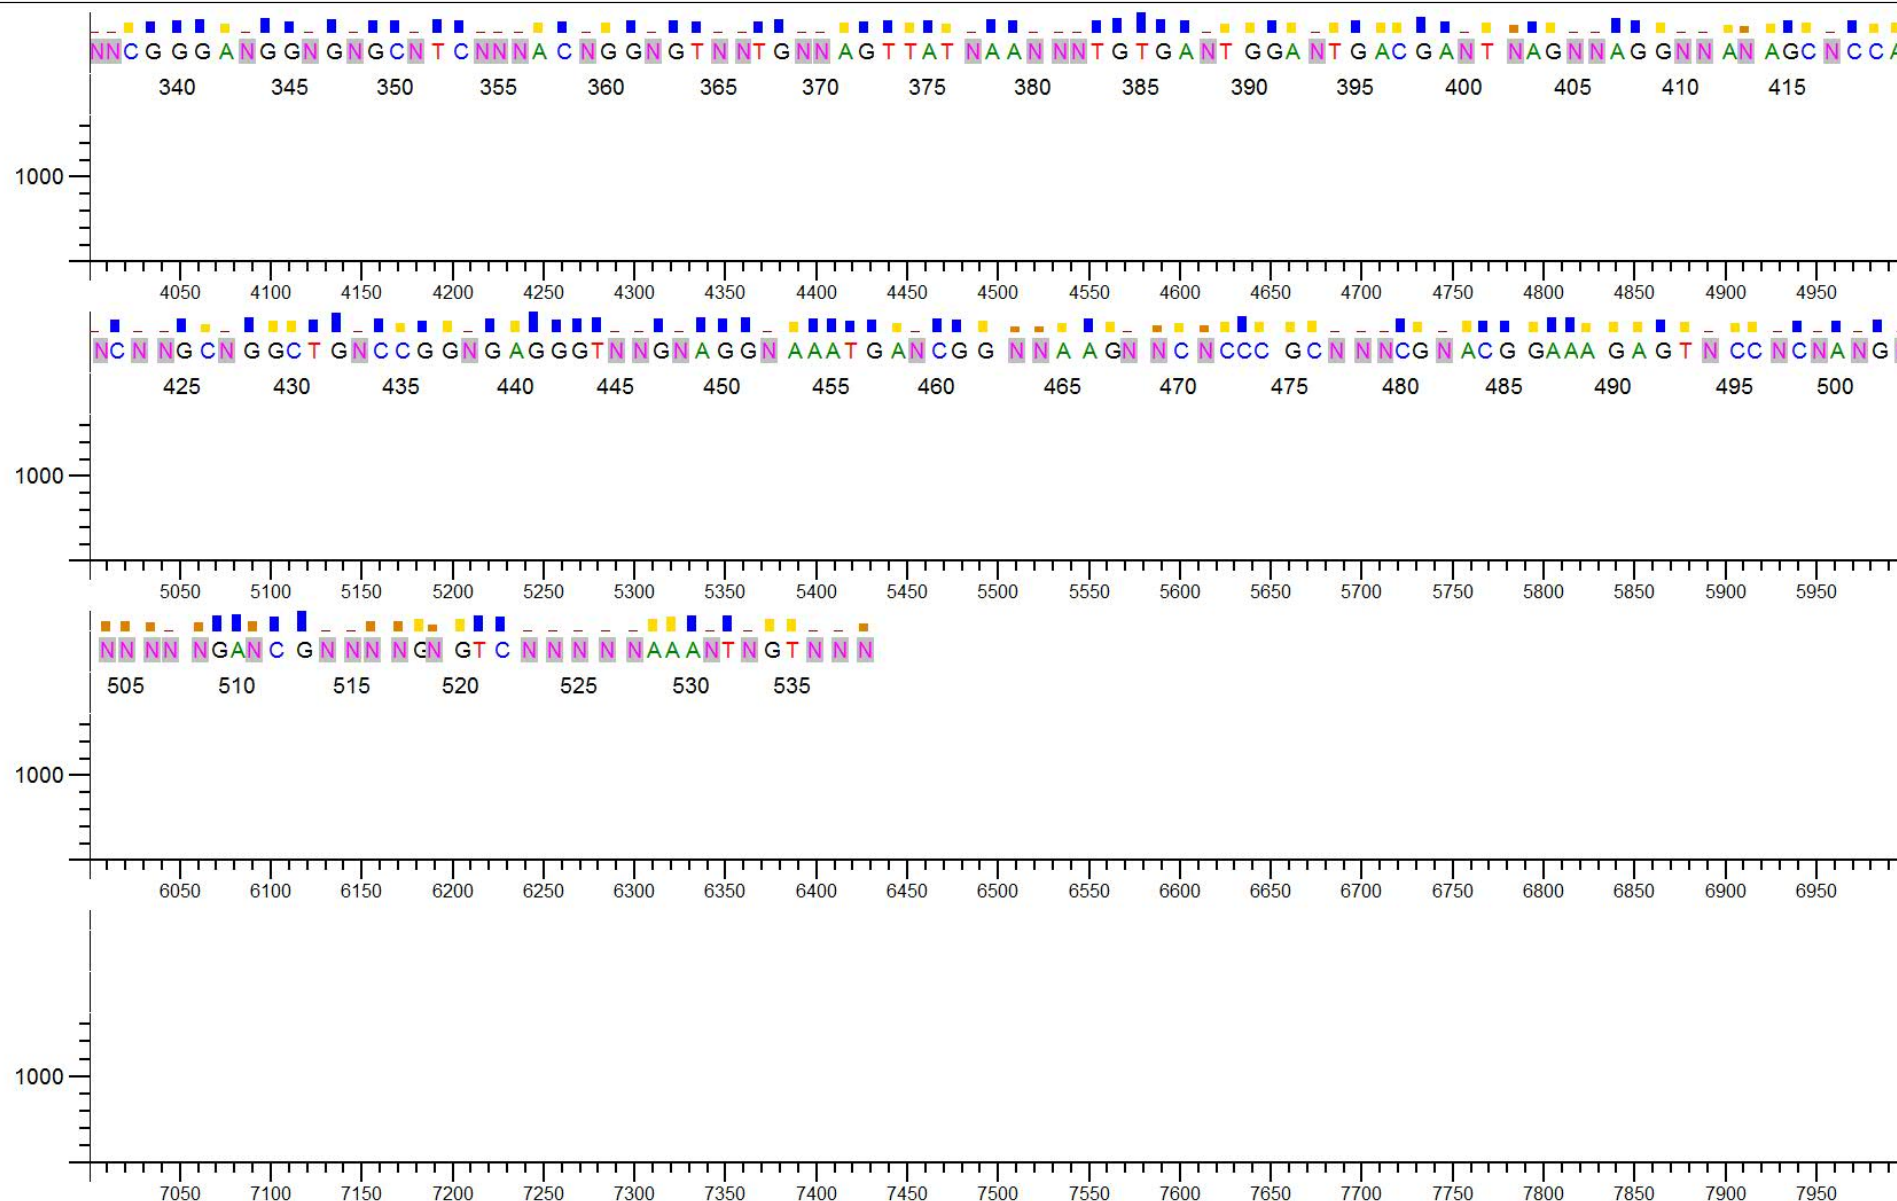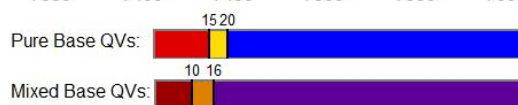

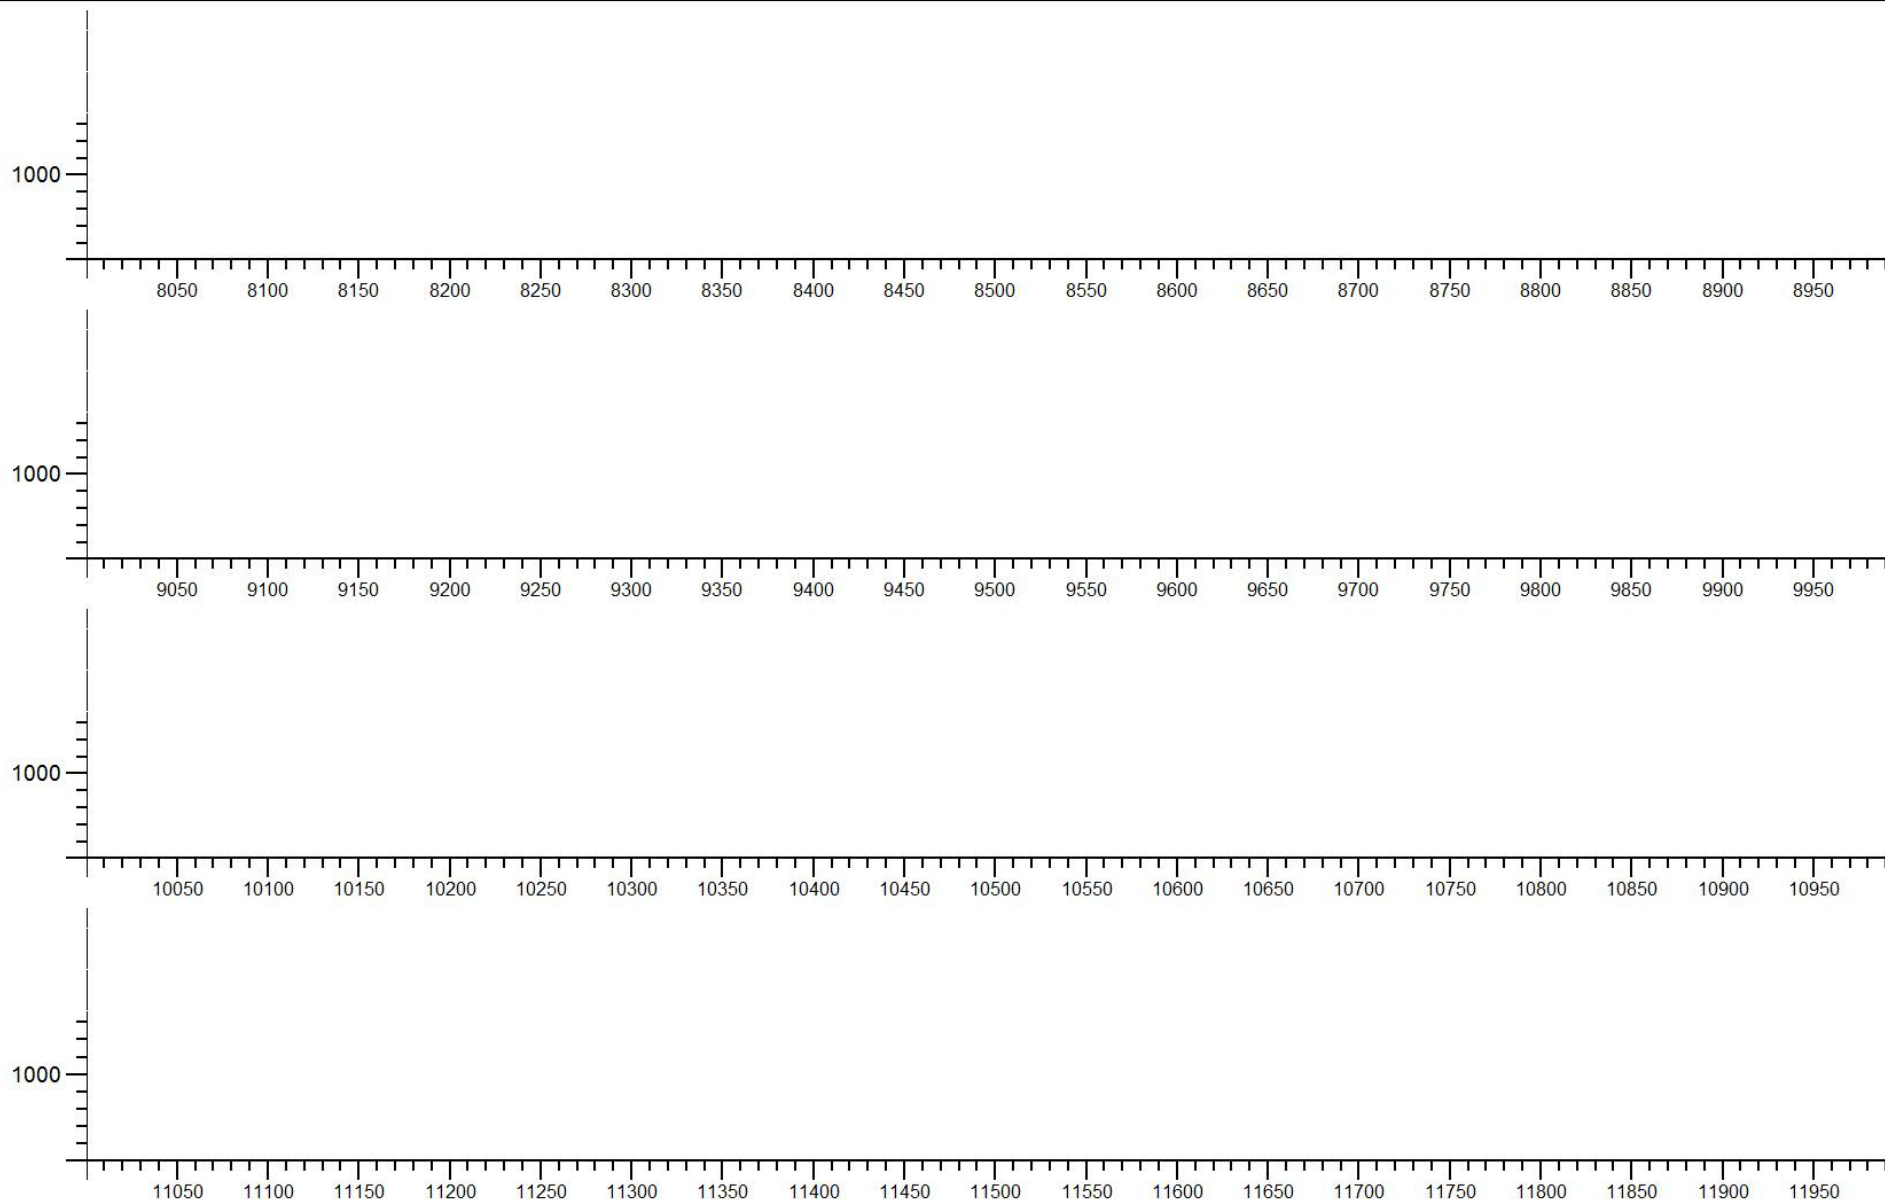

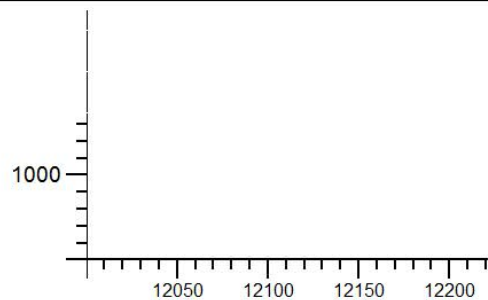

Supplement: raw_material.zip [file raw_material.zip]

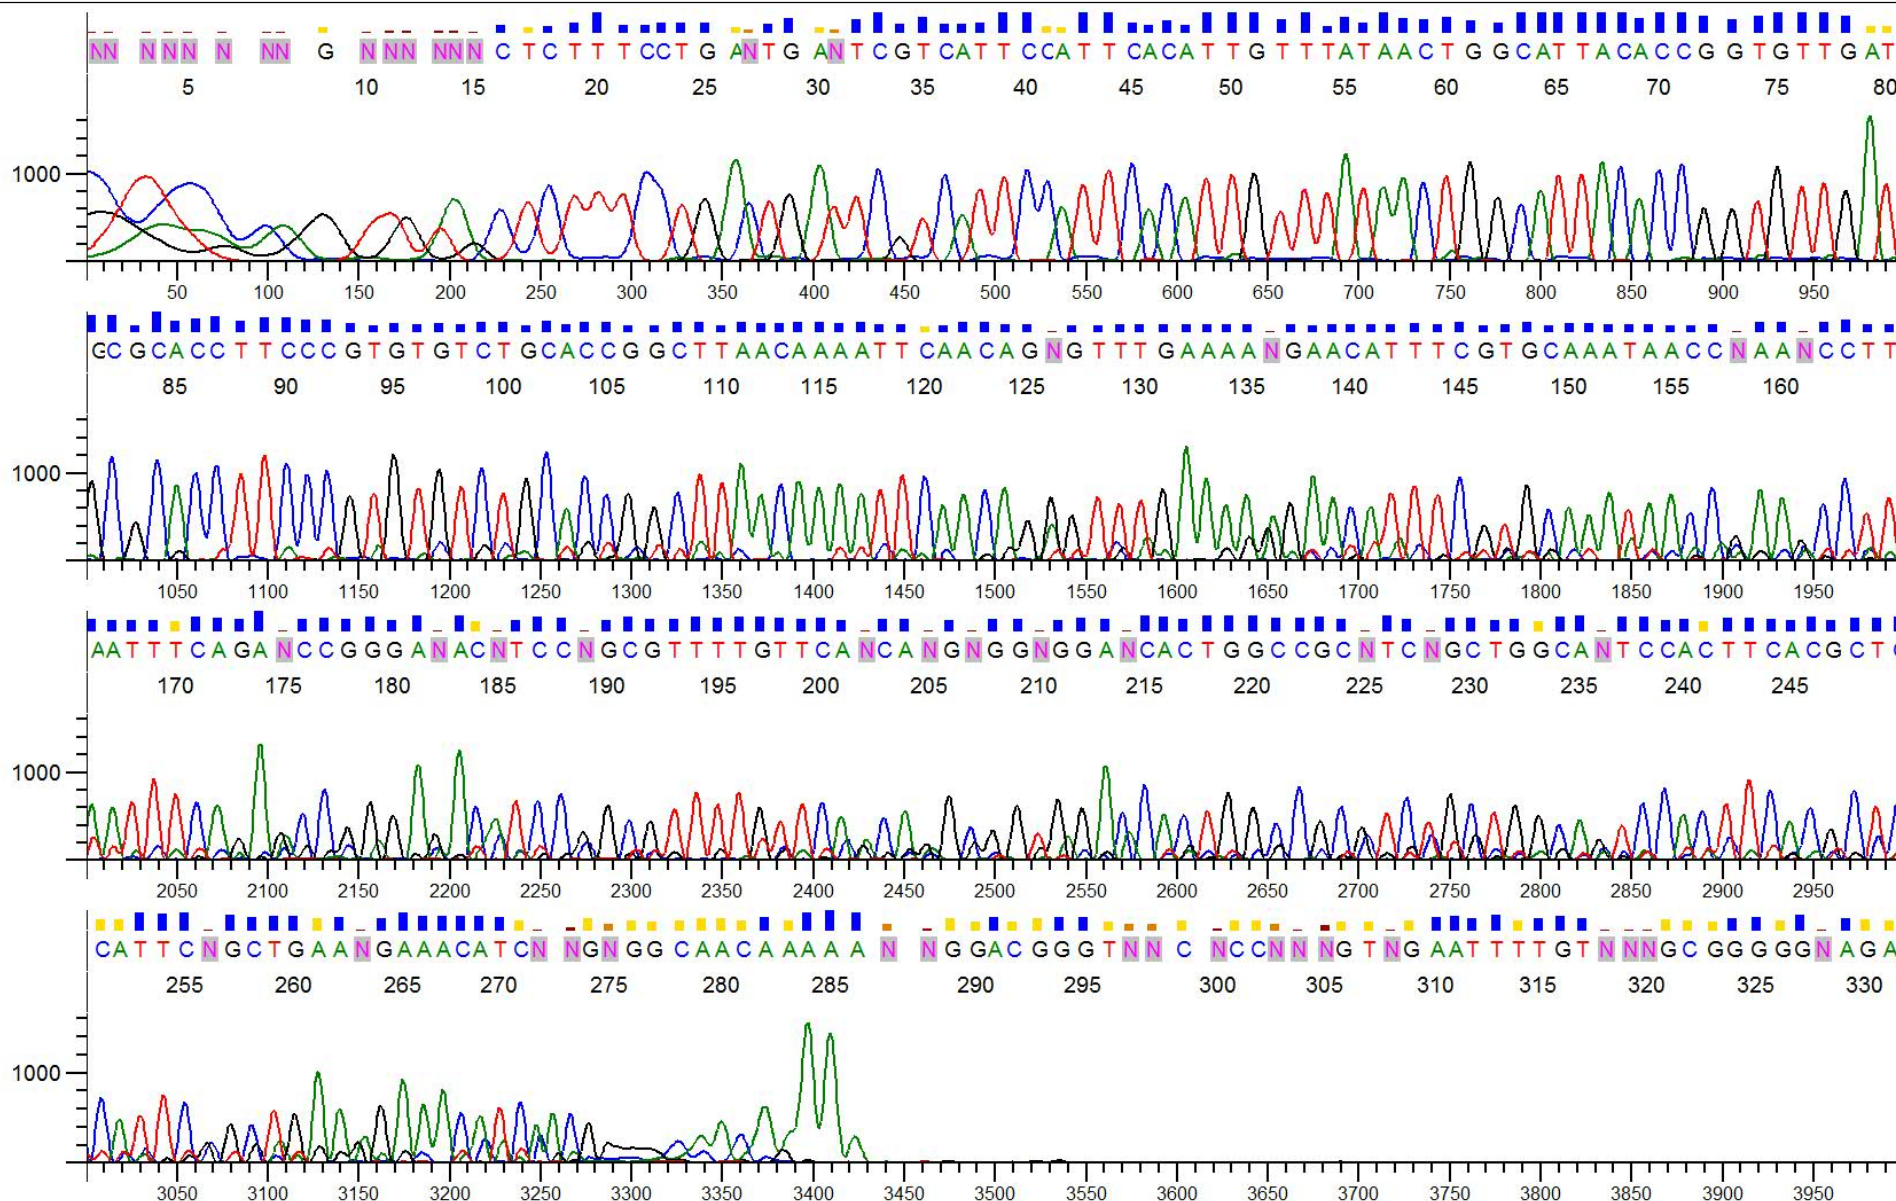

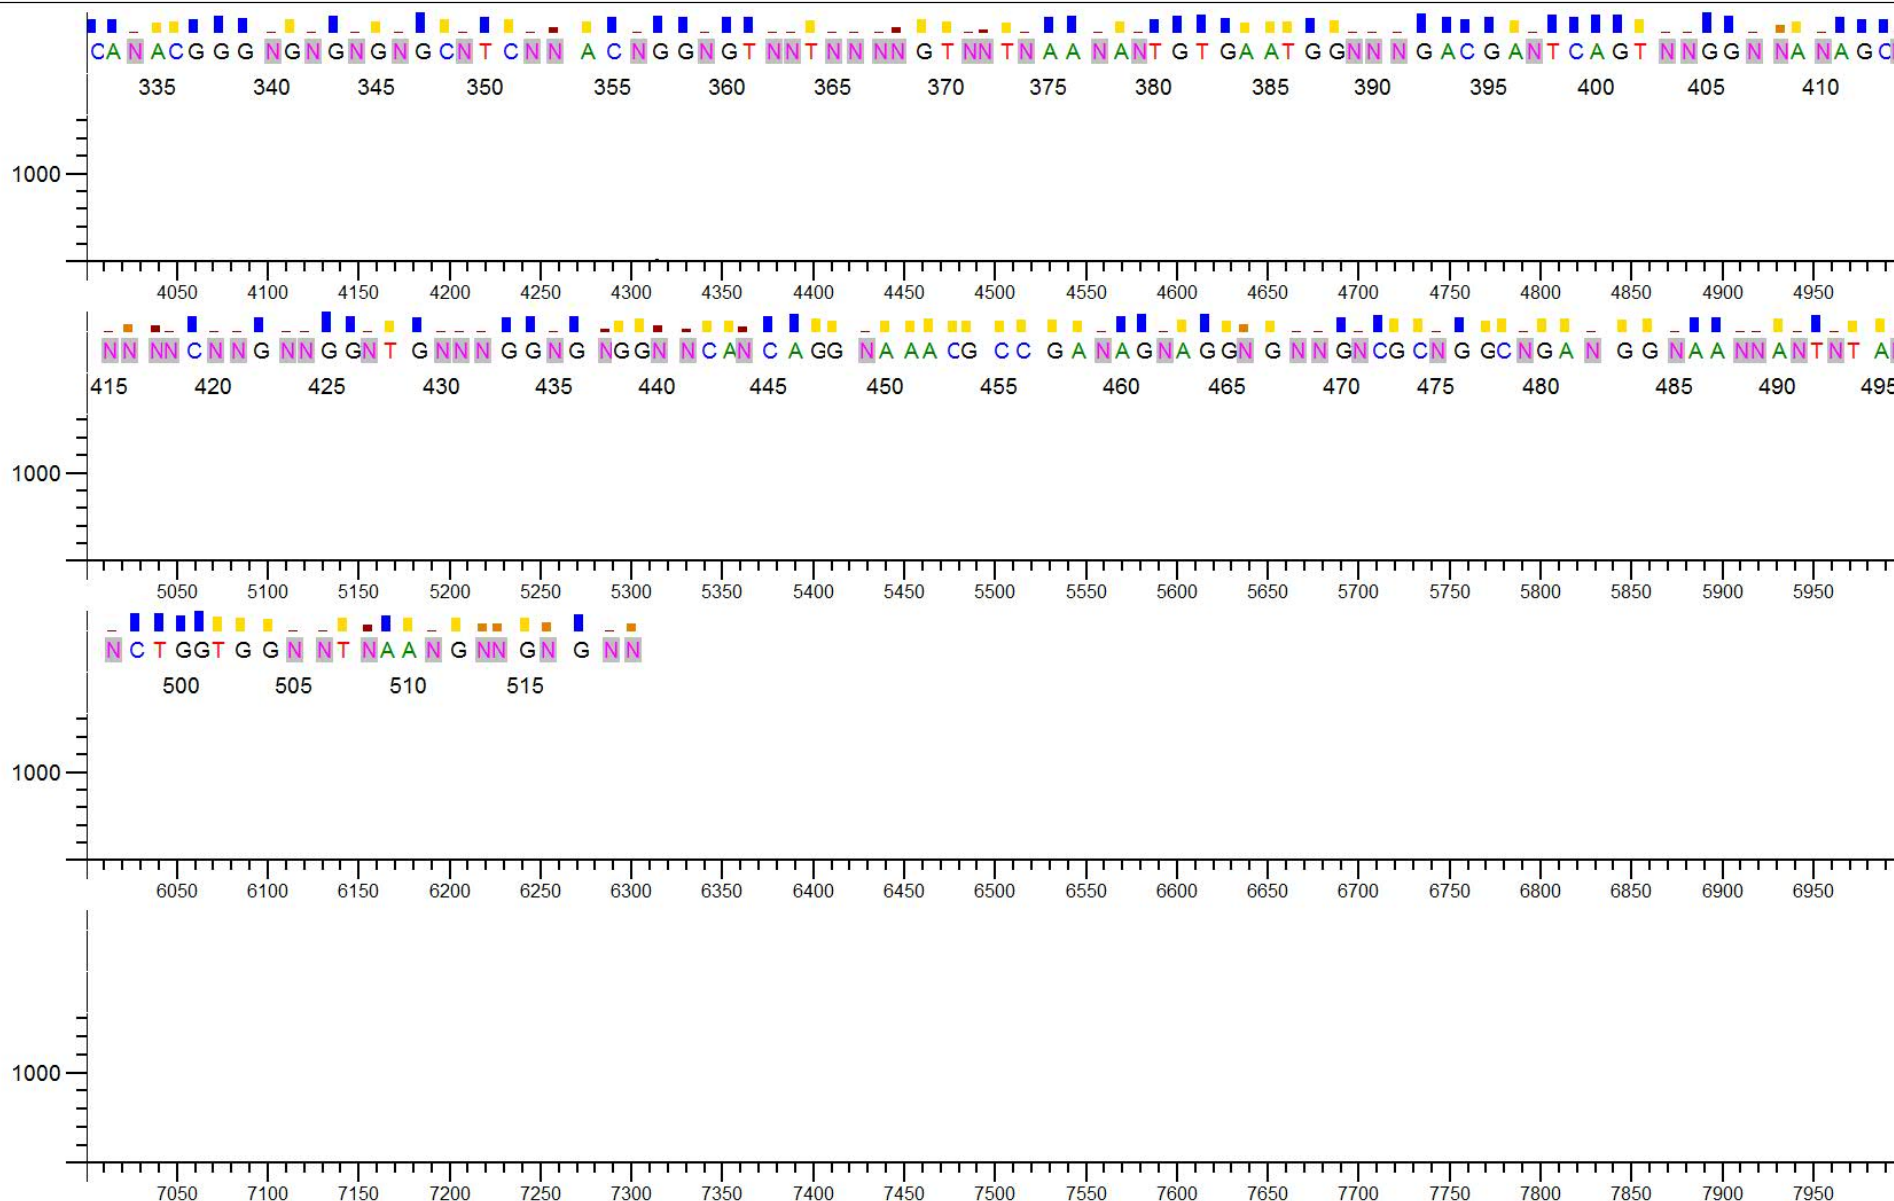

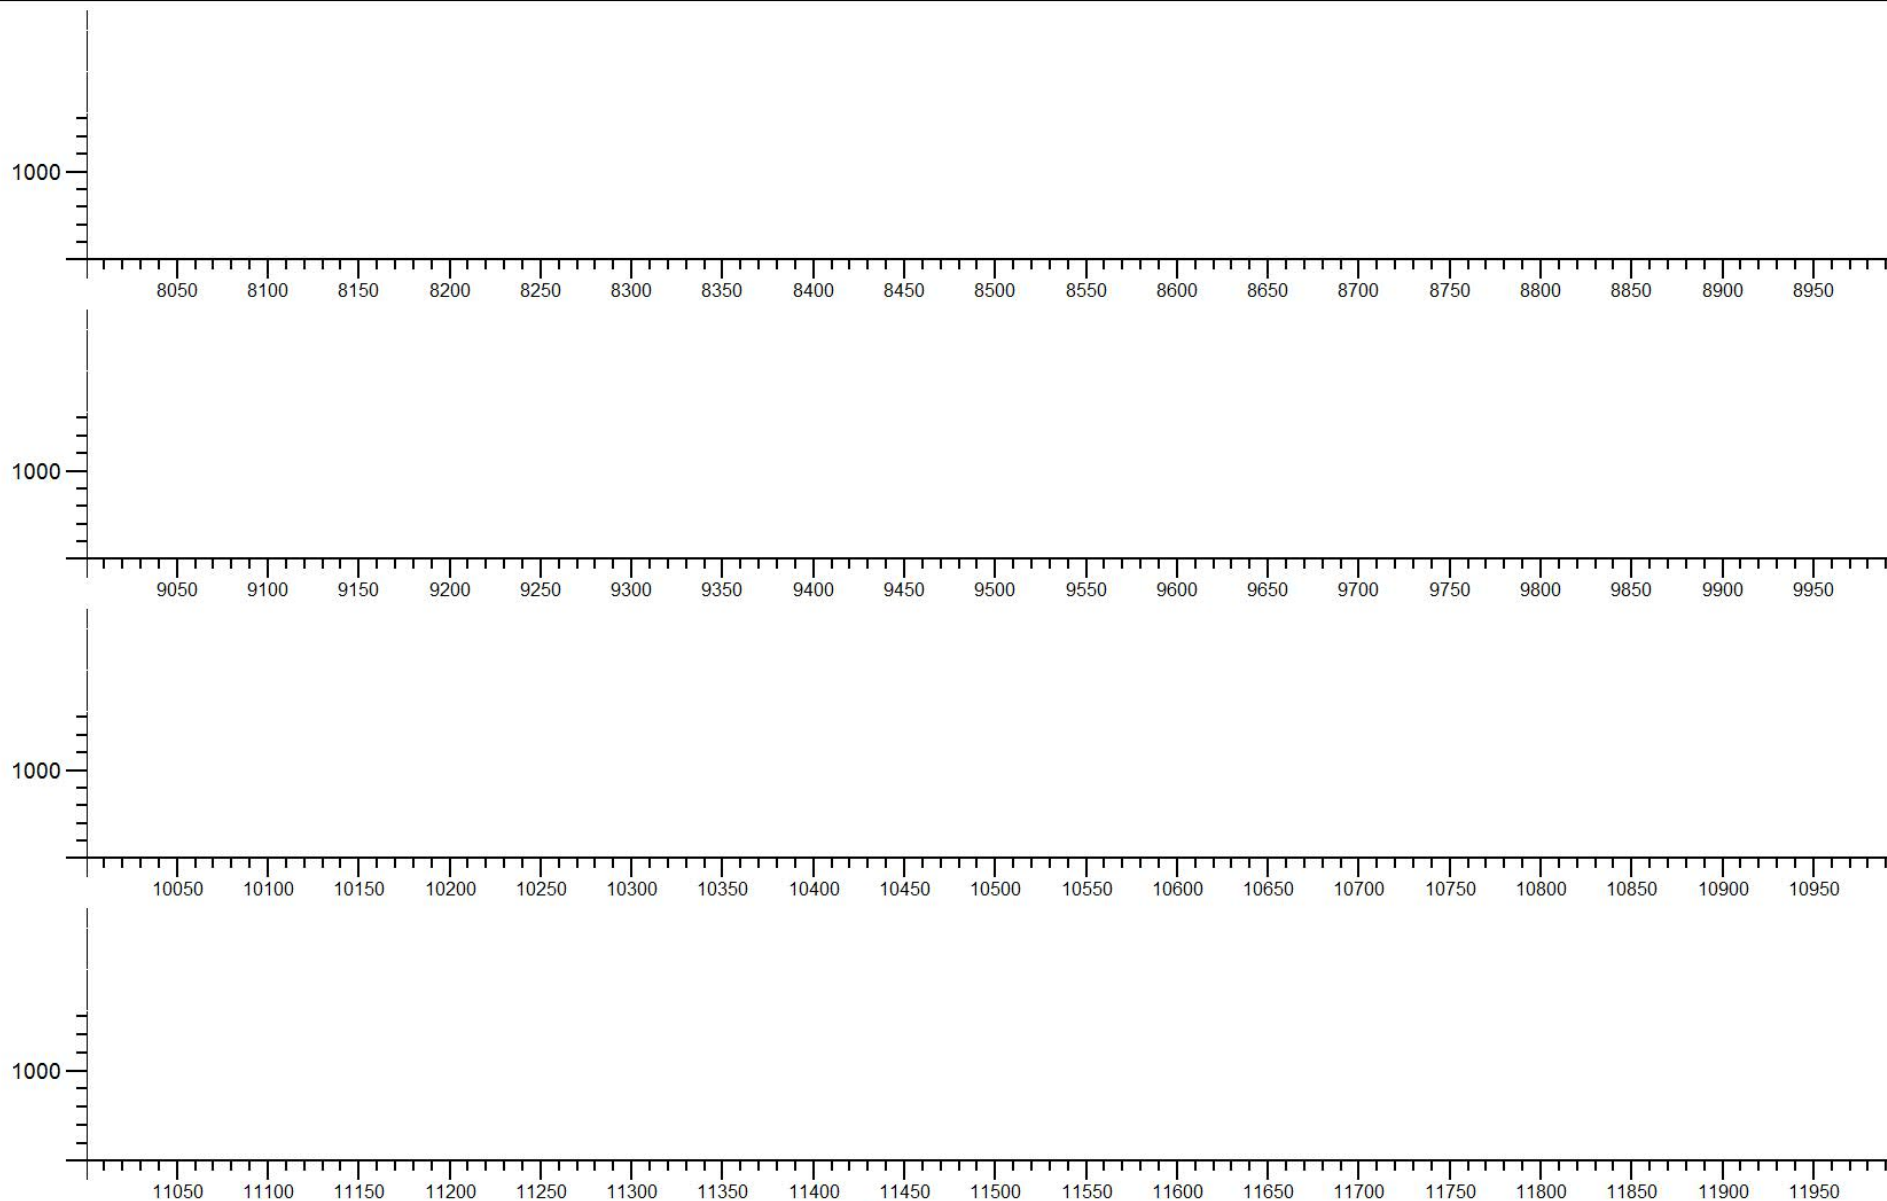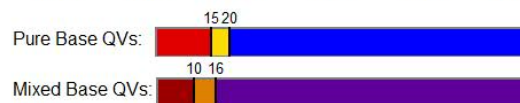

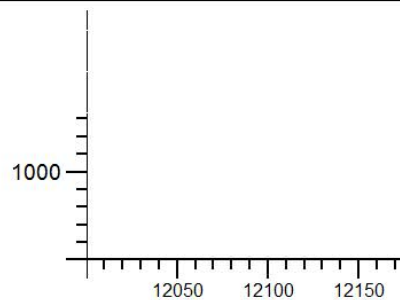

Supplement: raw_material.zip [file raw_material.zip]

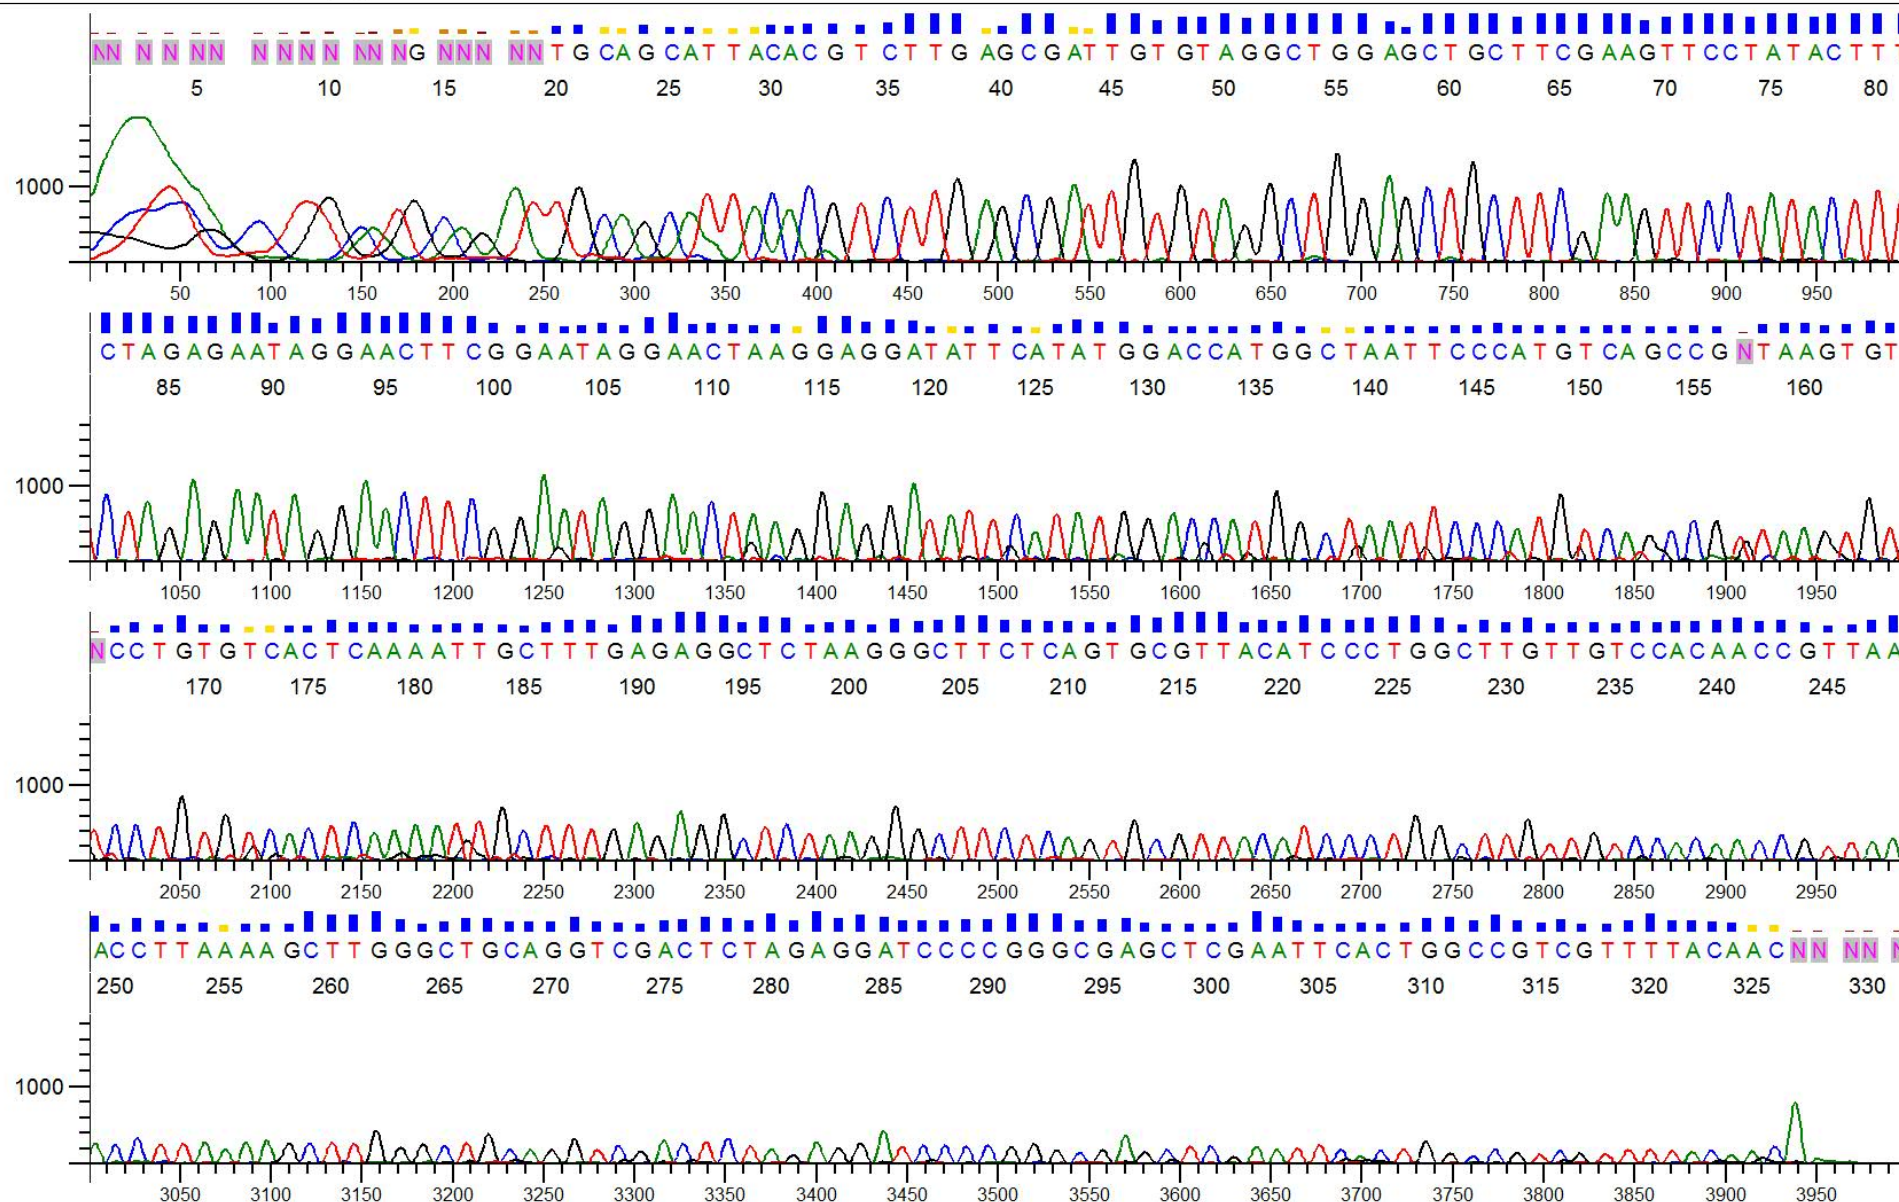

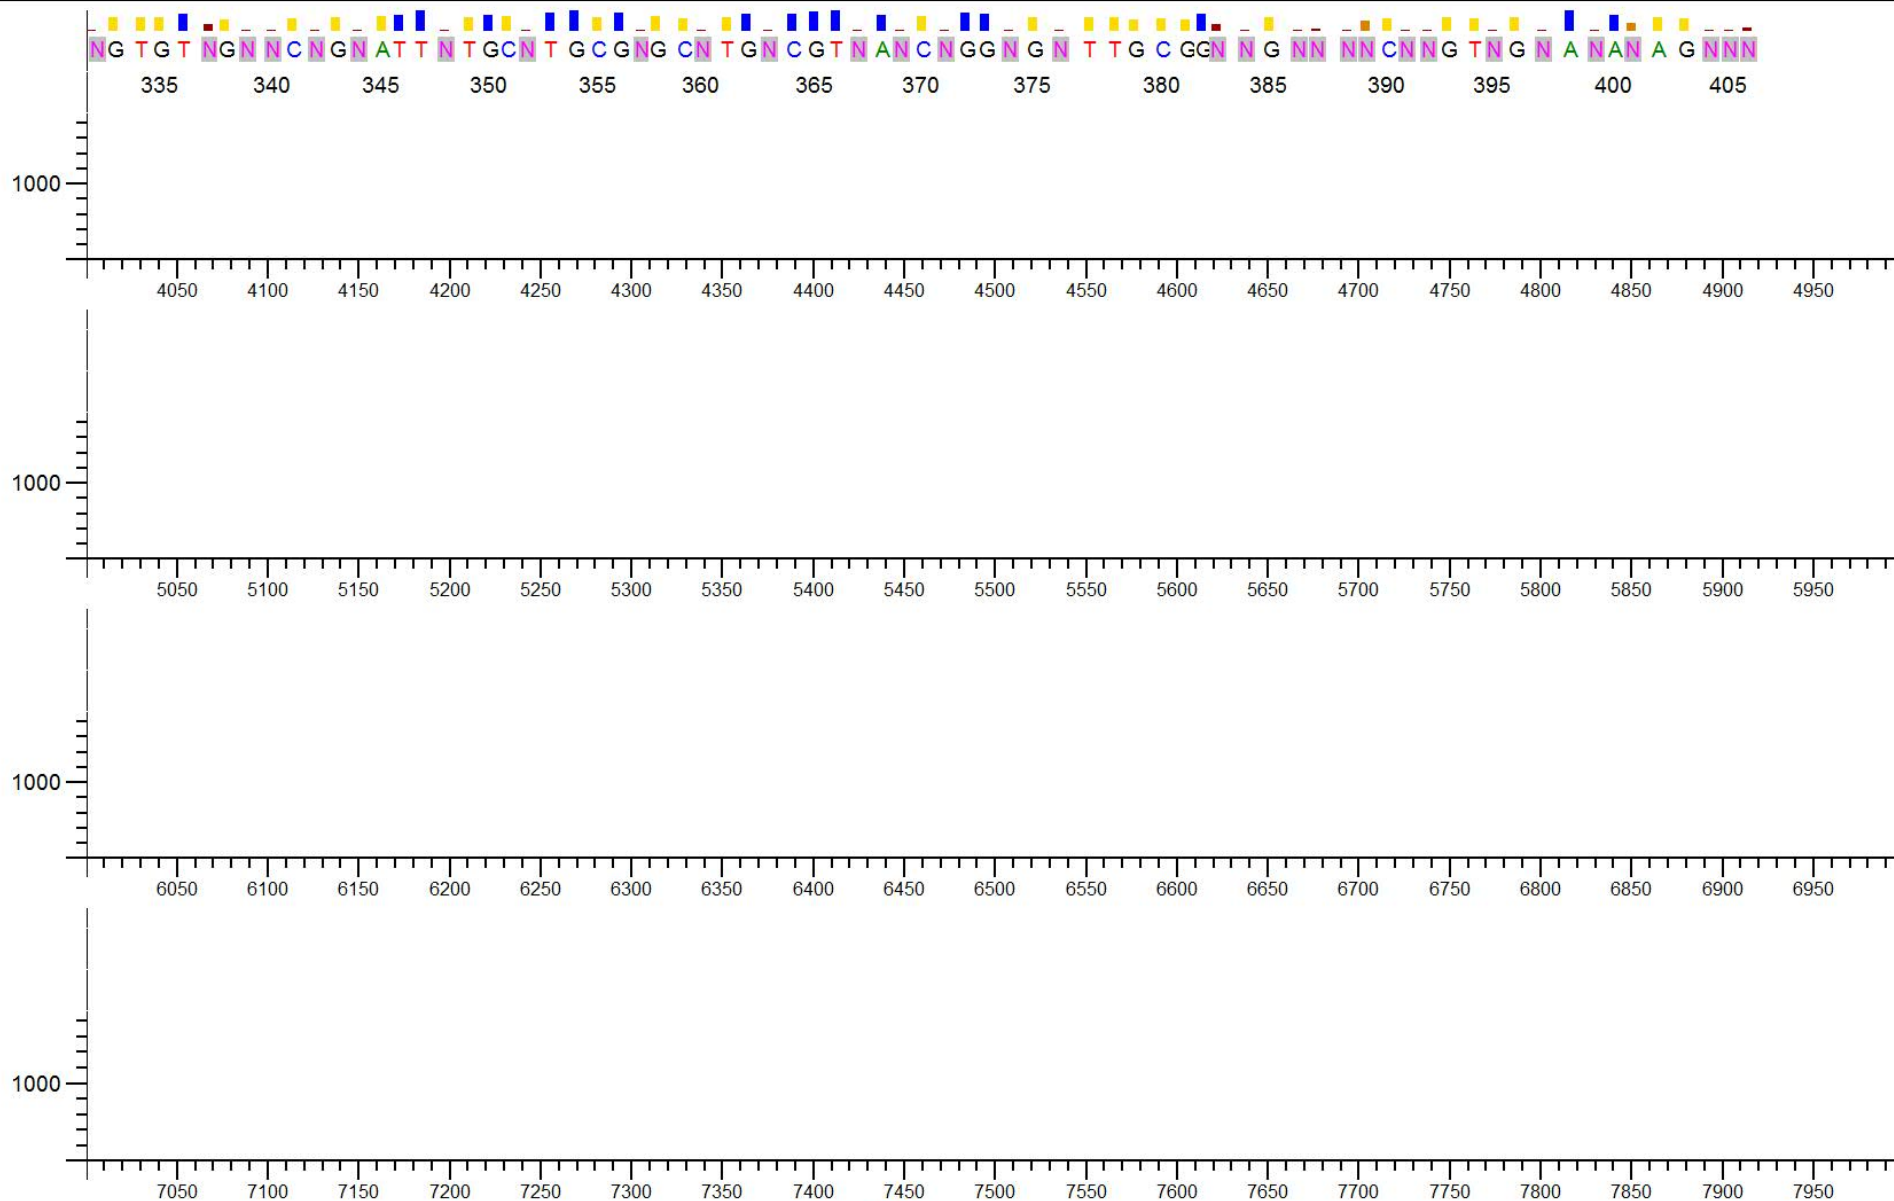

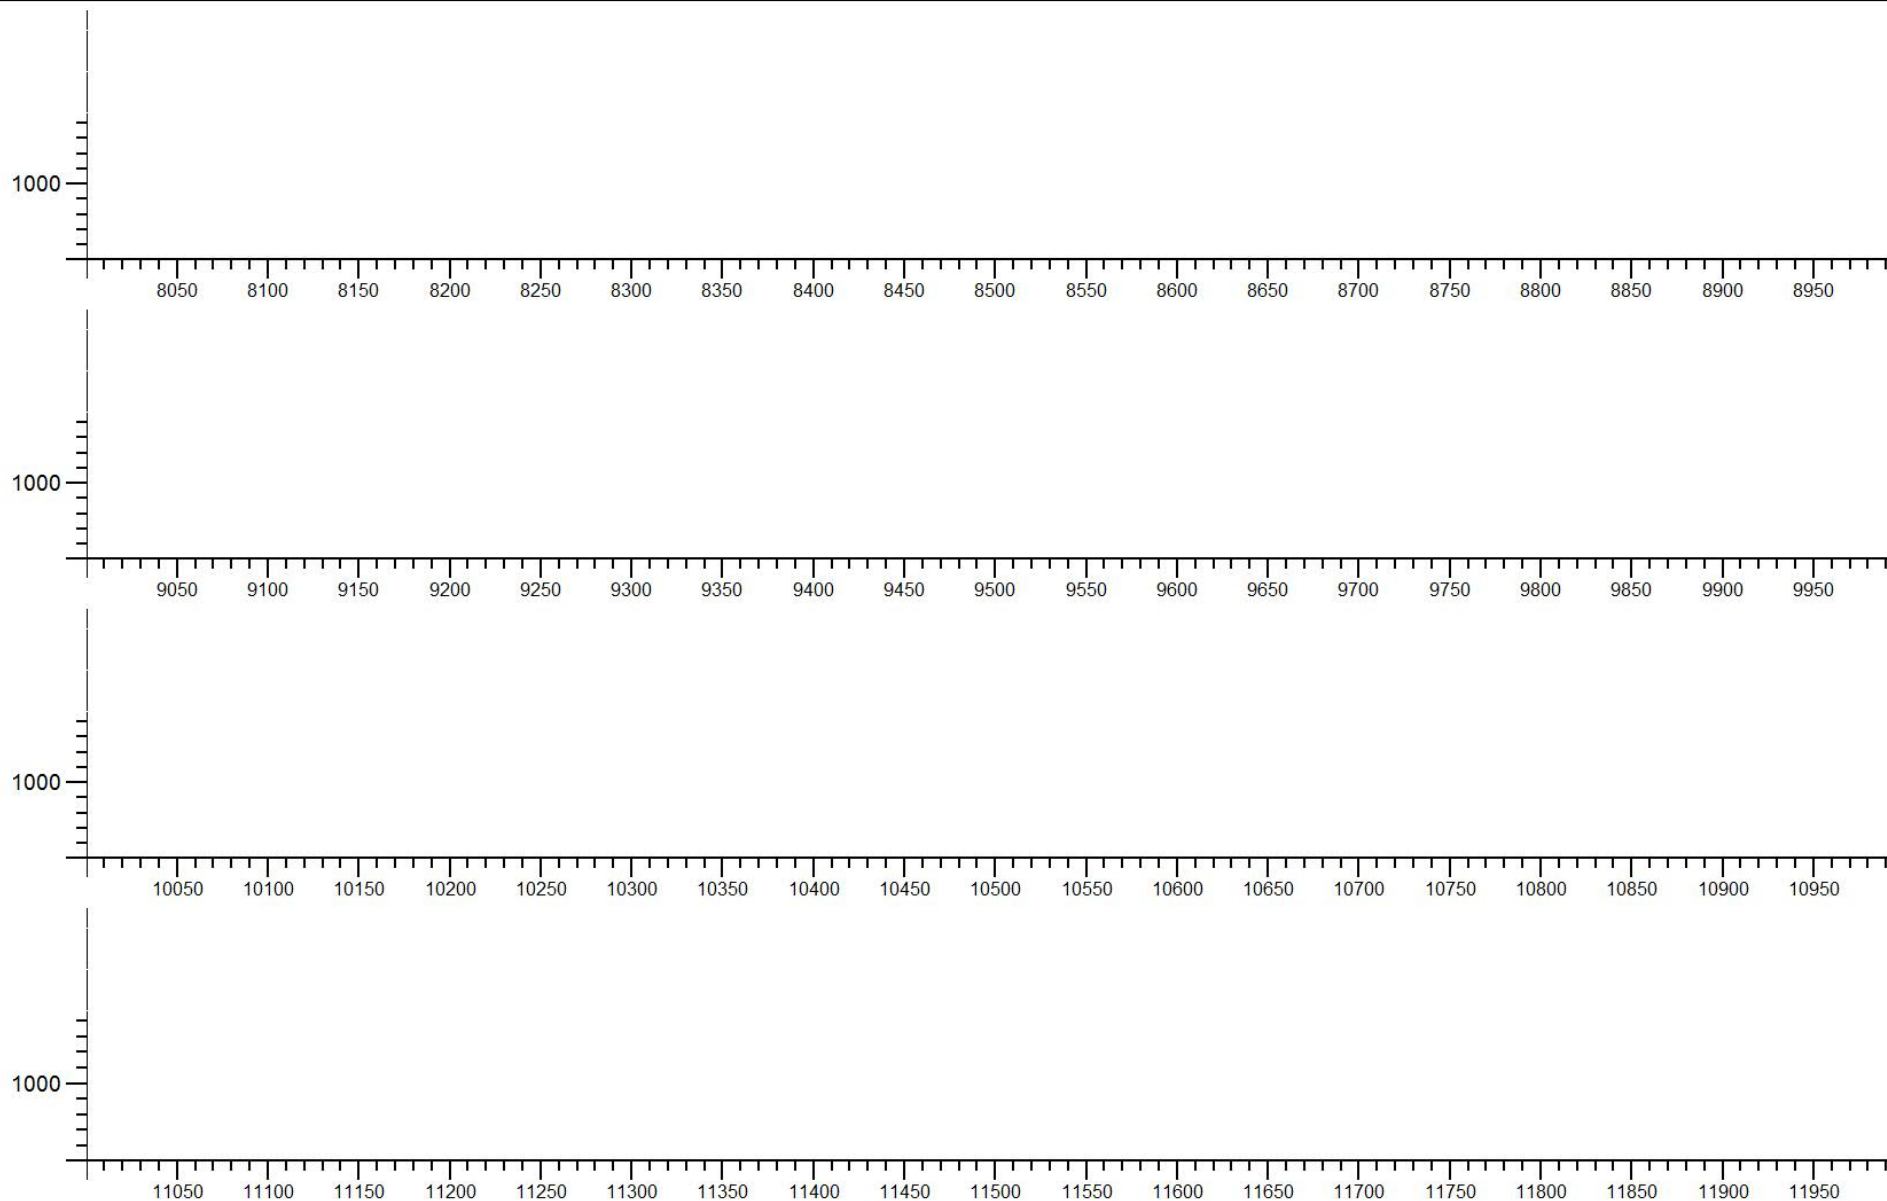

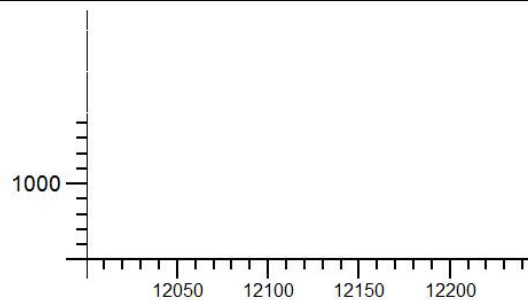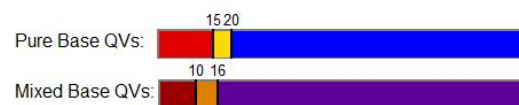

Supplement: raw_material.zip [file raw_material.zip]

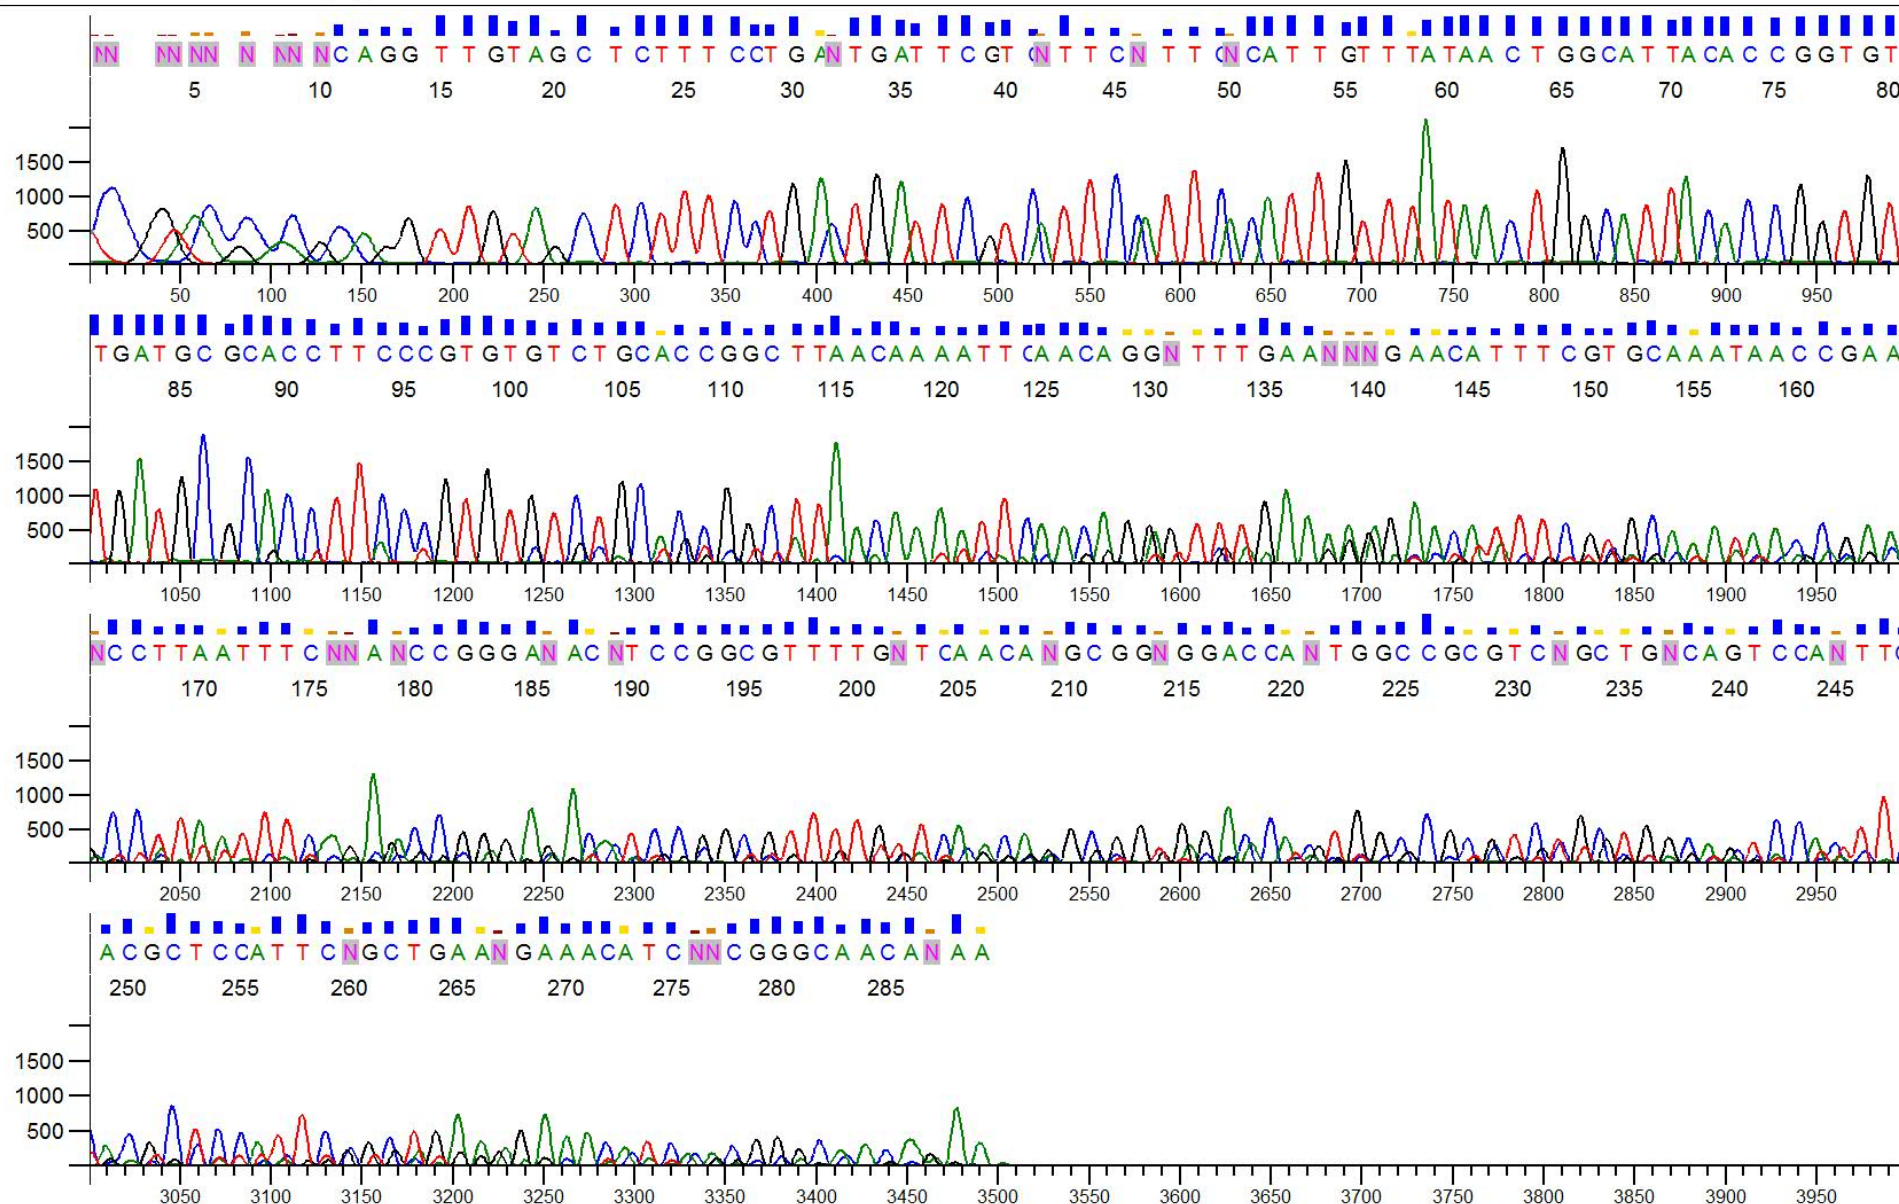

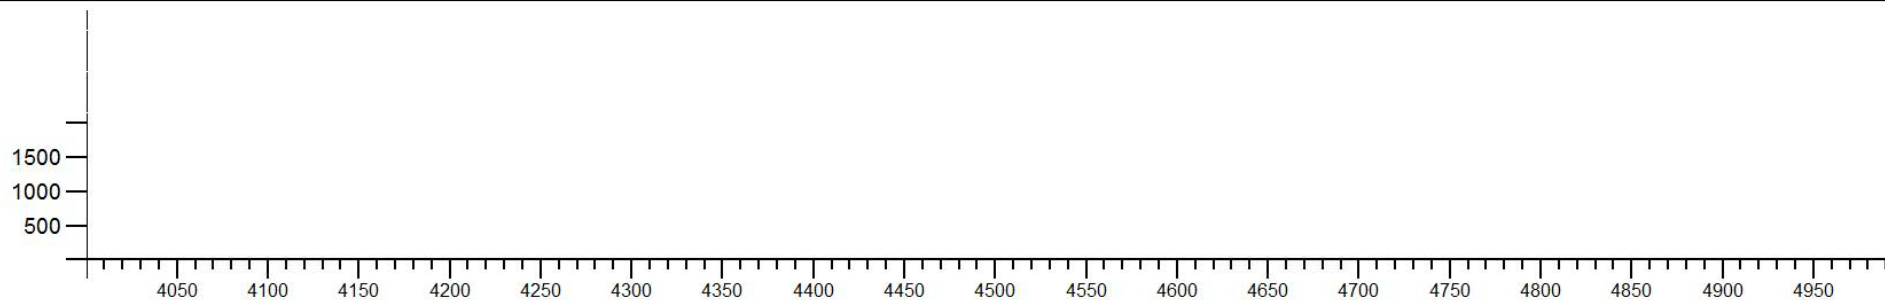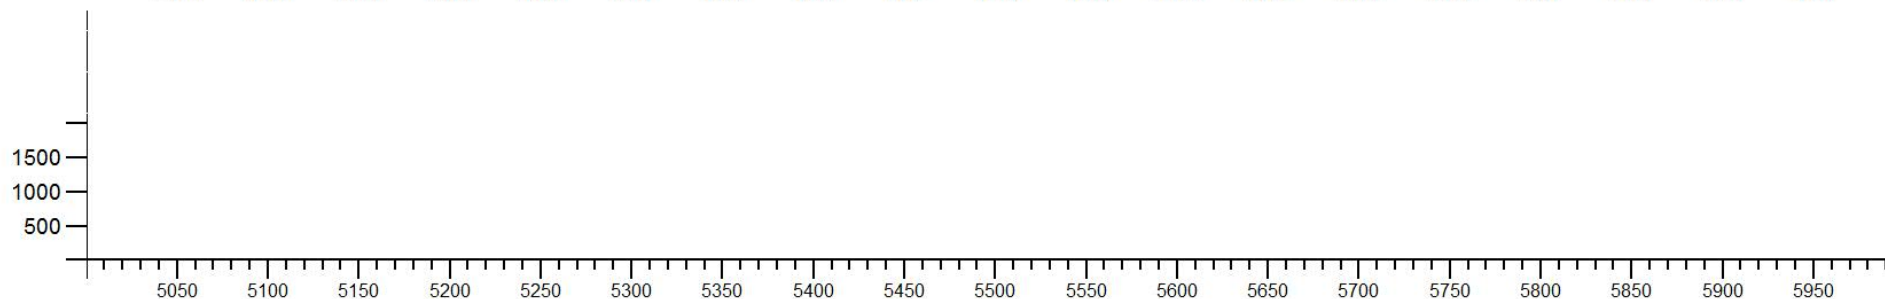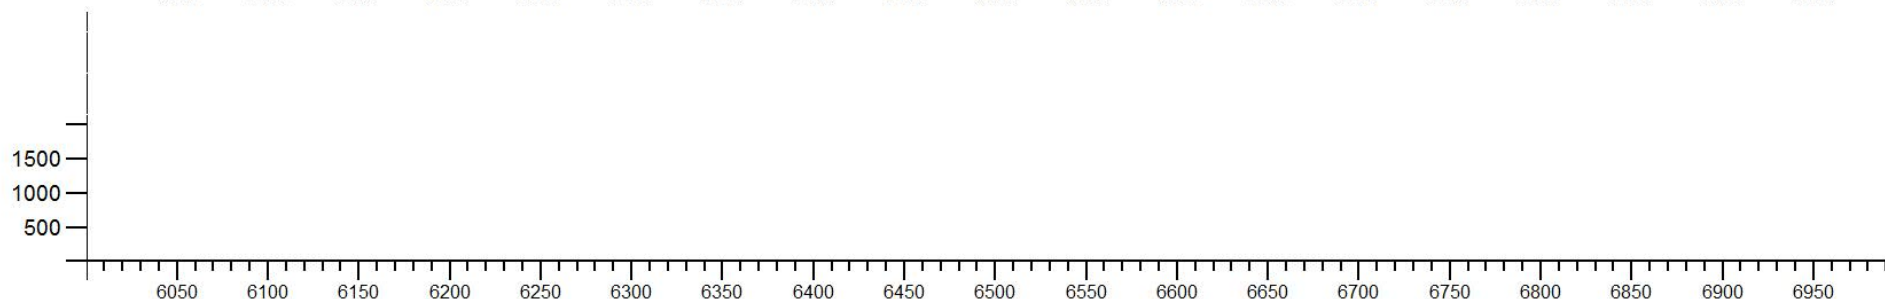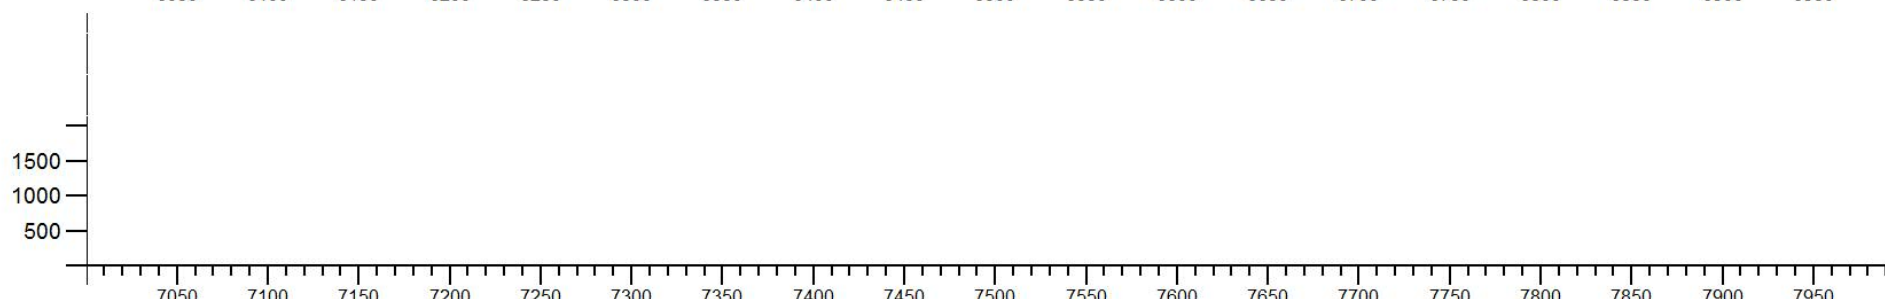

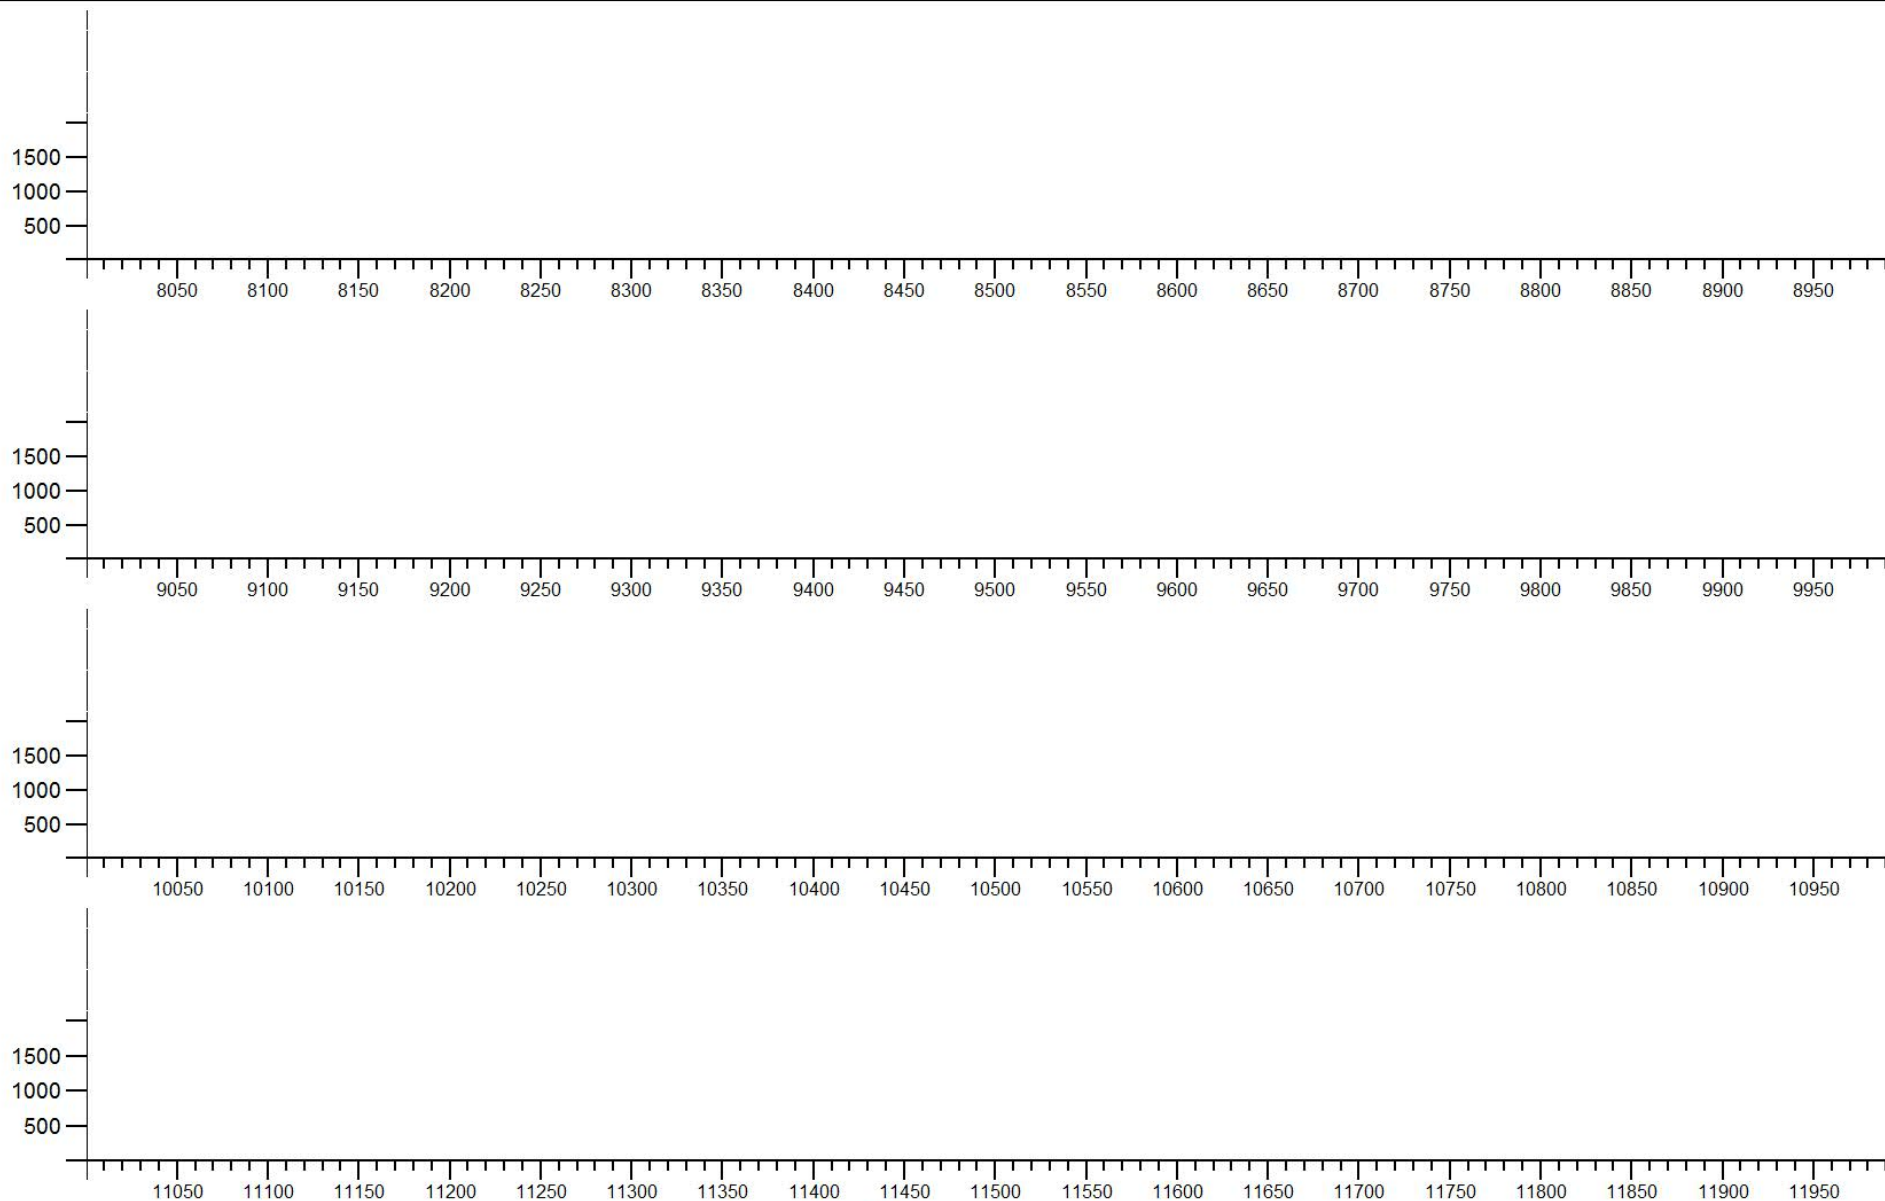

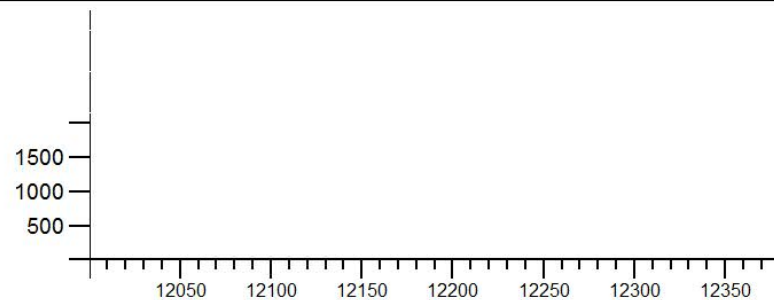

Supplement: raw_material.zip [file raw_material.zip]

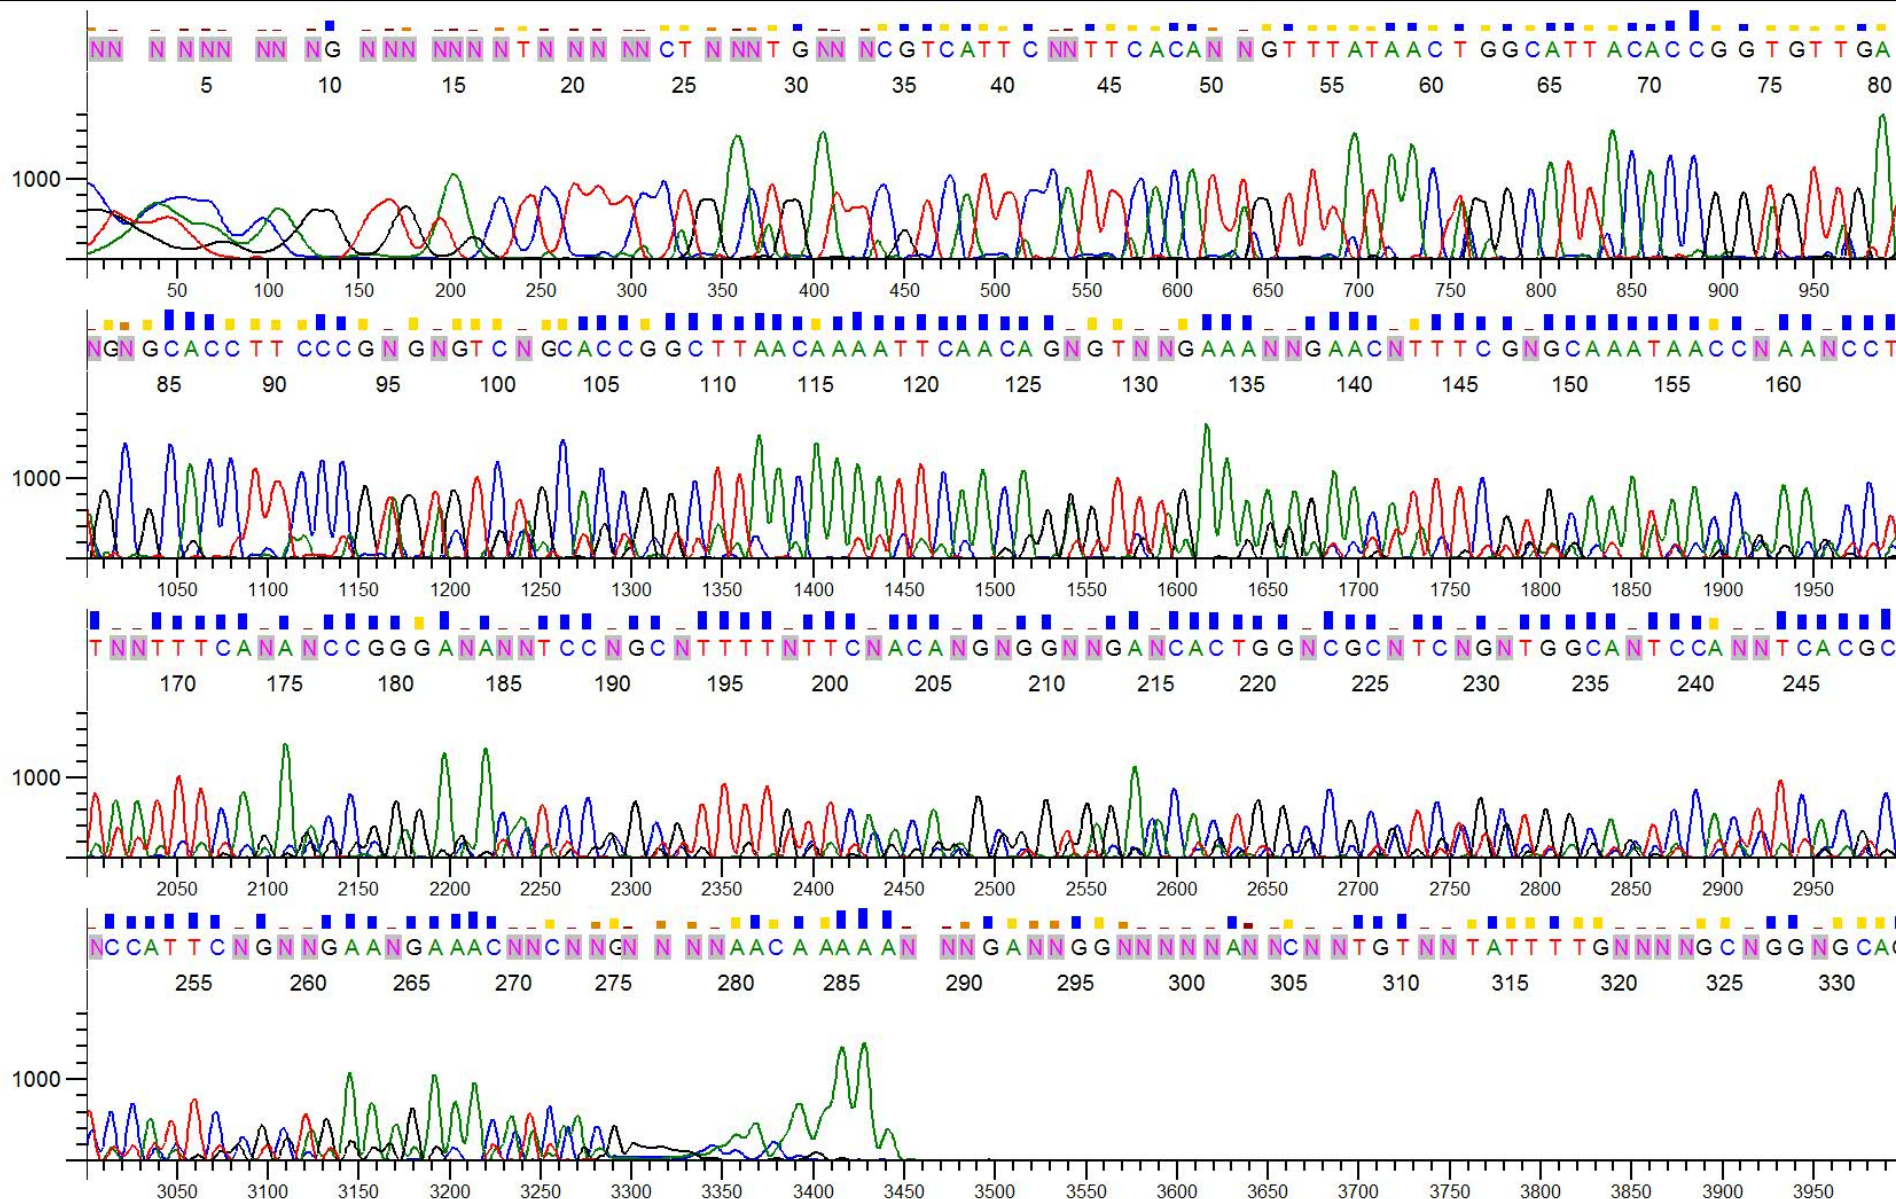

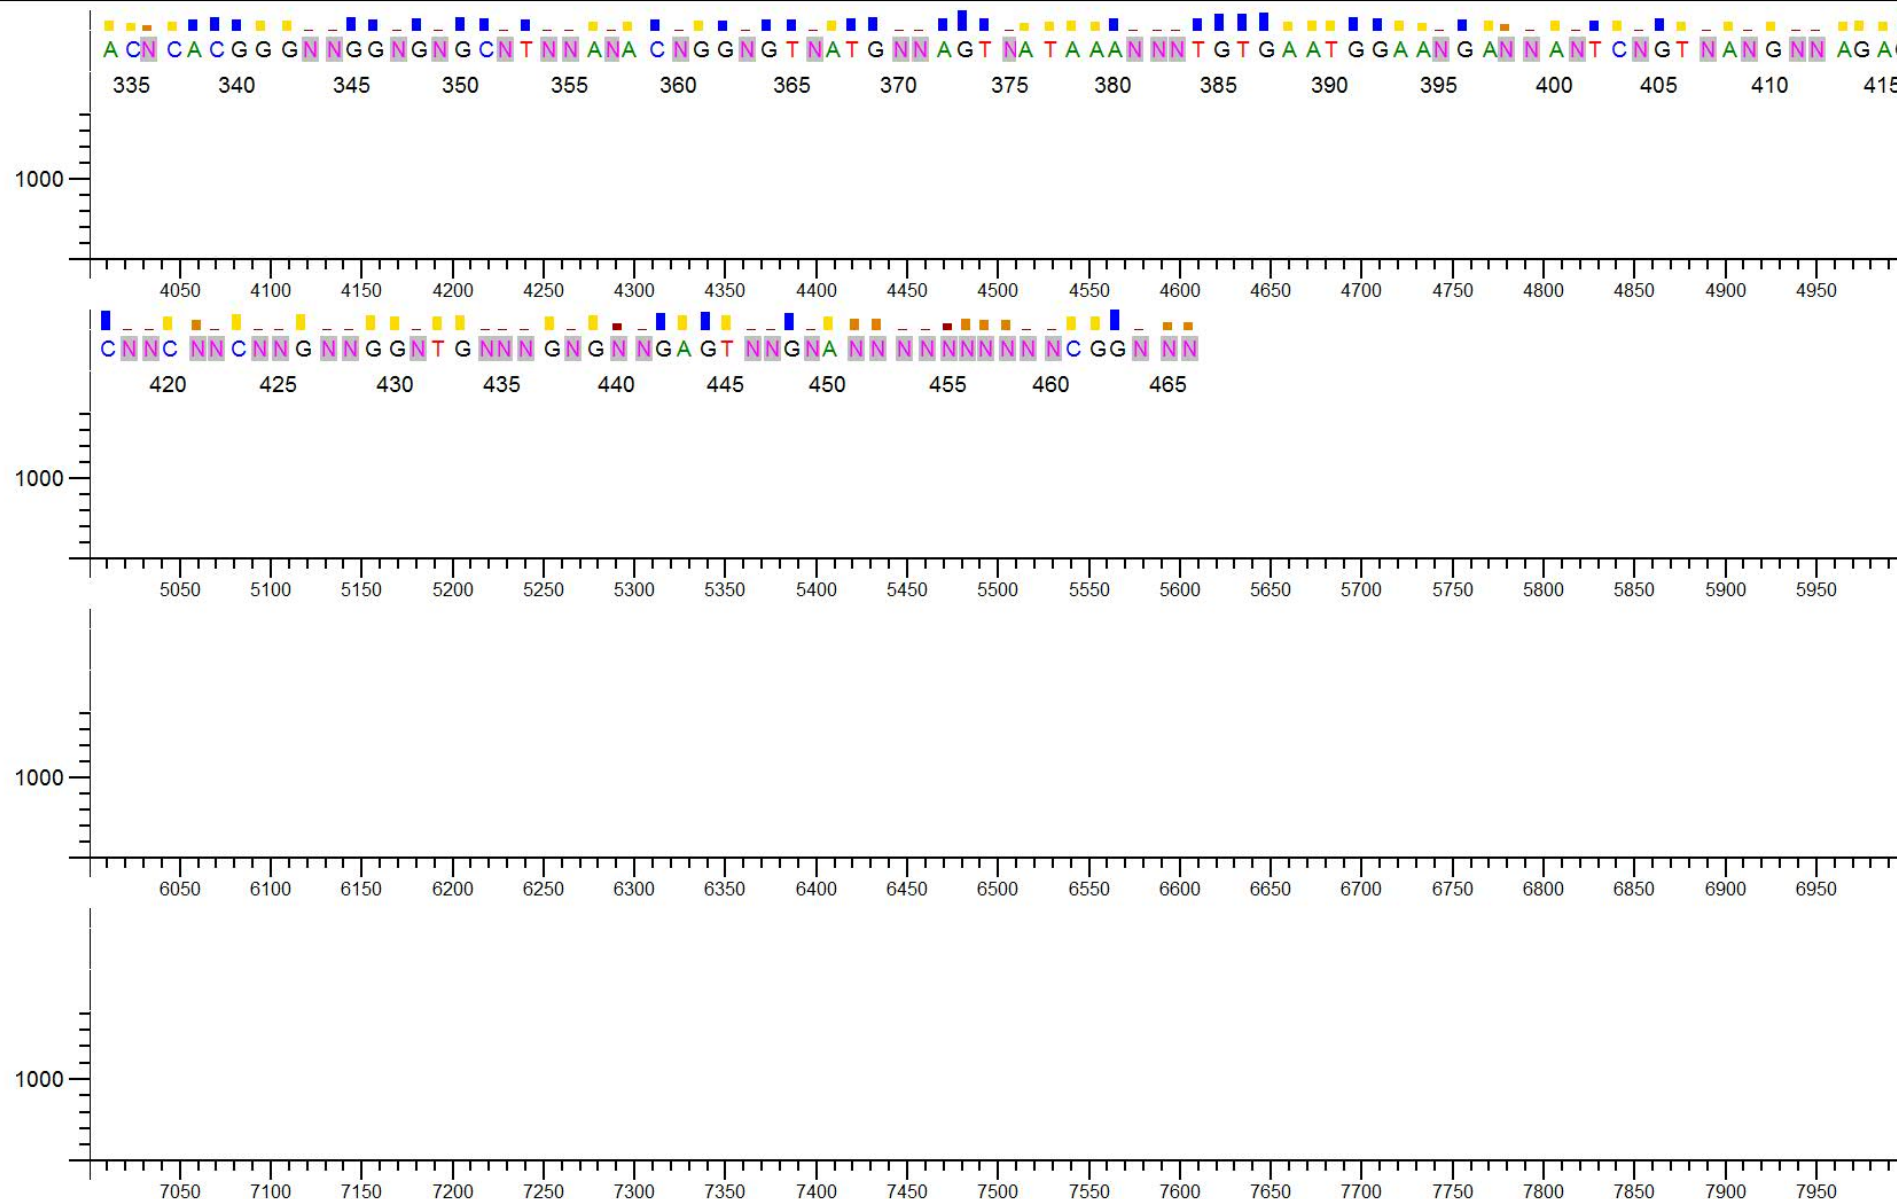

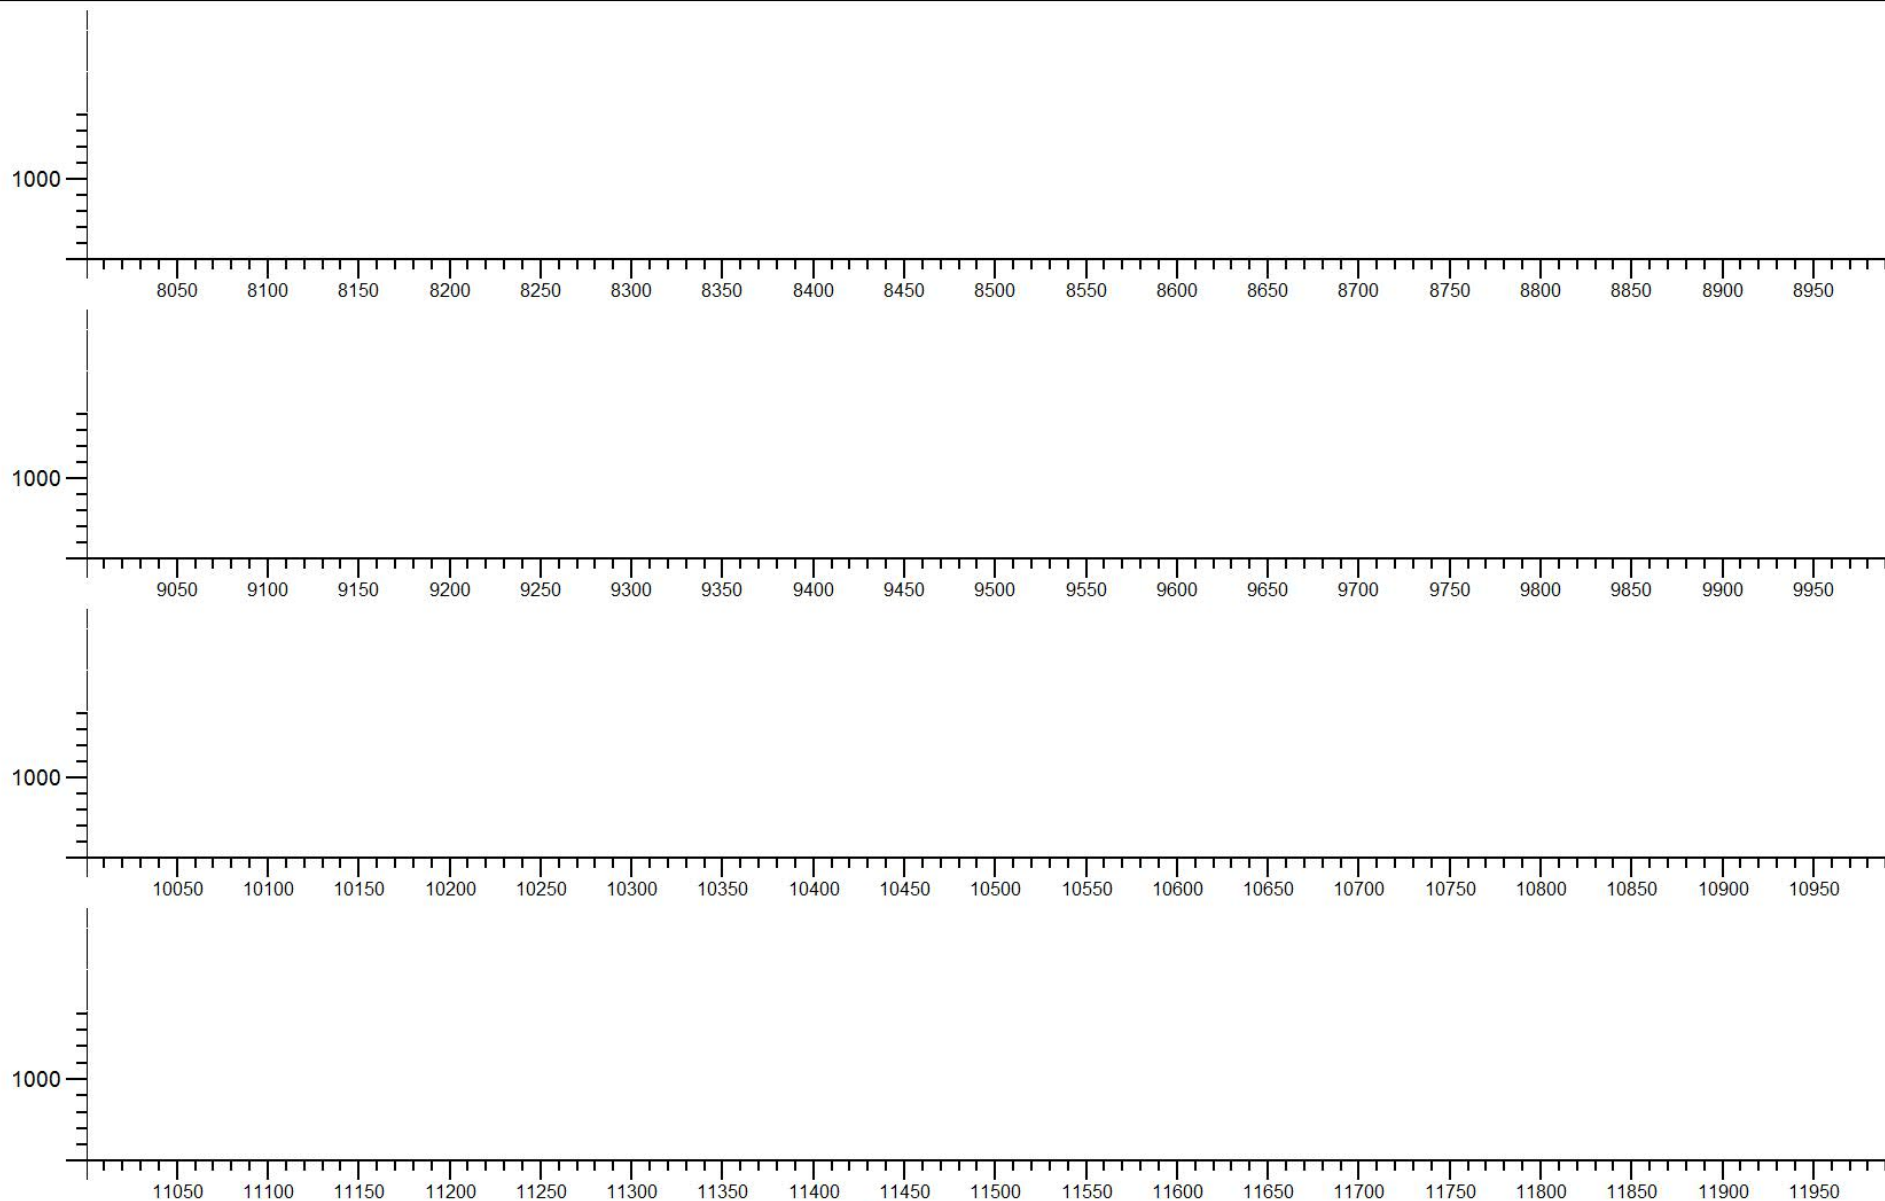

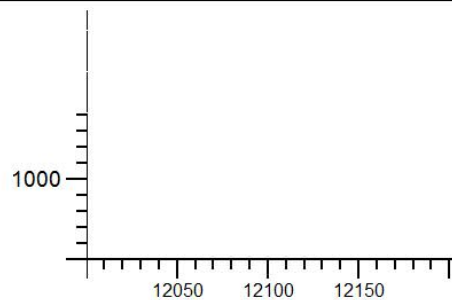

Supplement: raw_material.zip [file raw_material.zip]

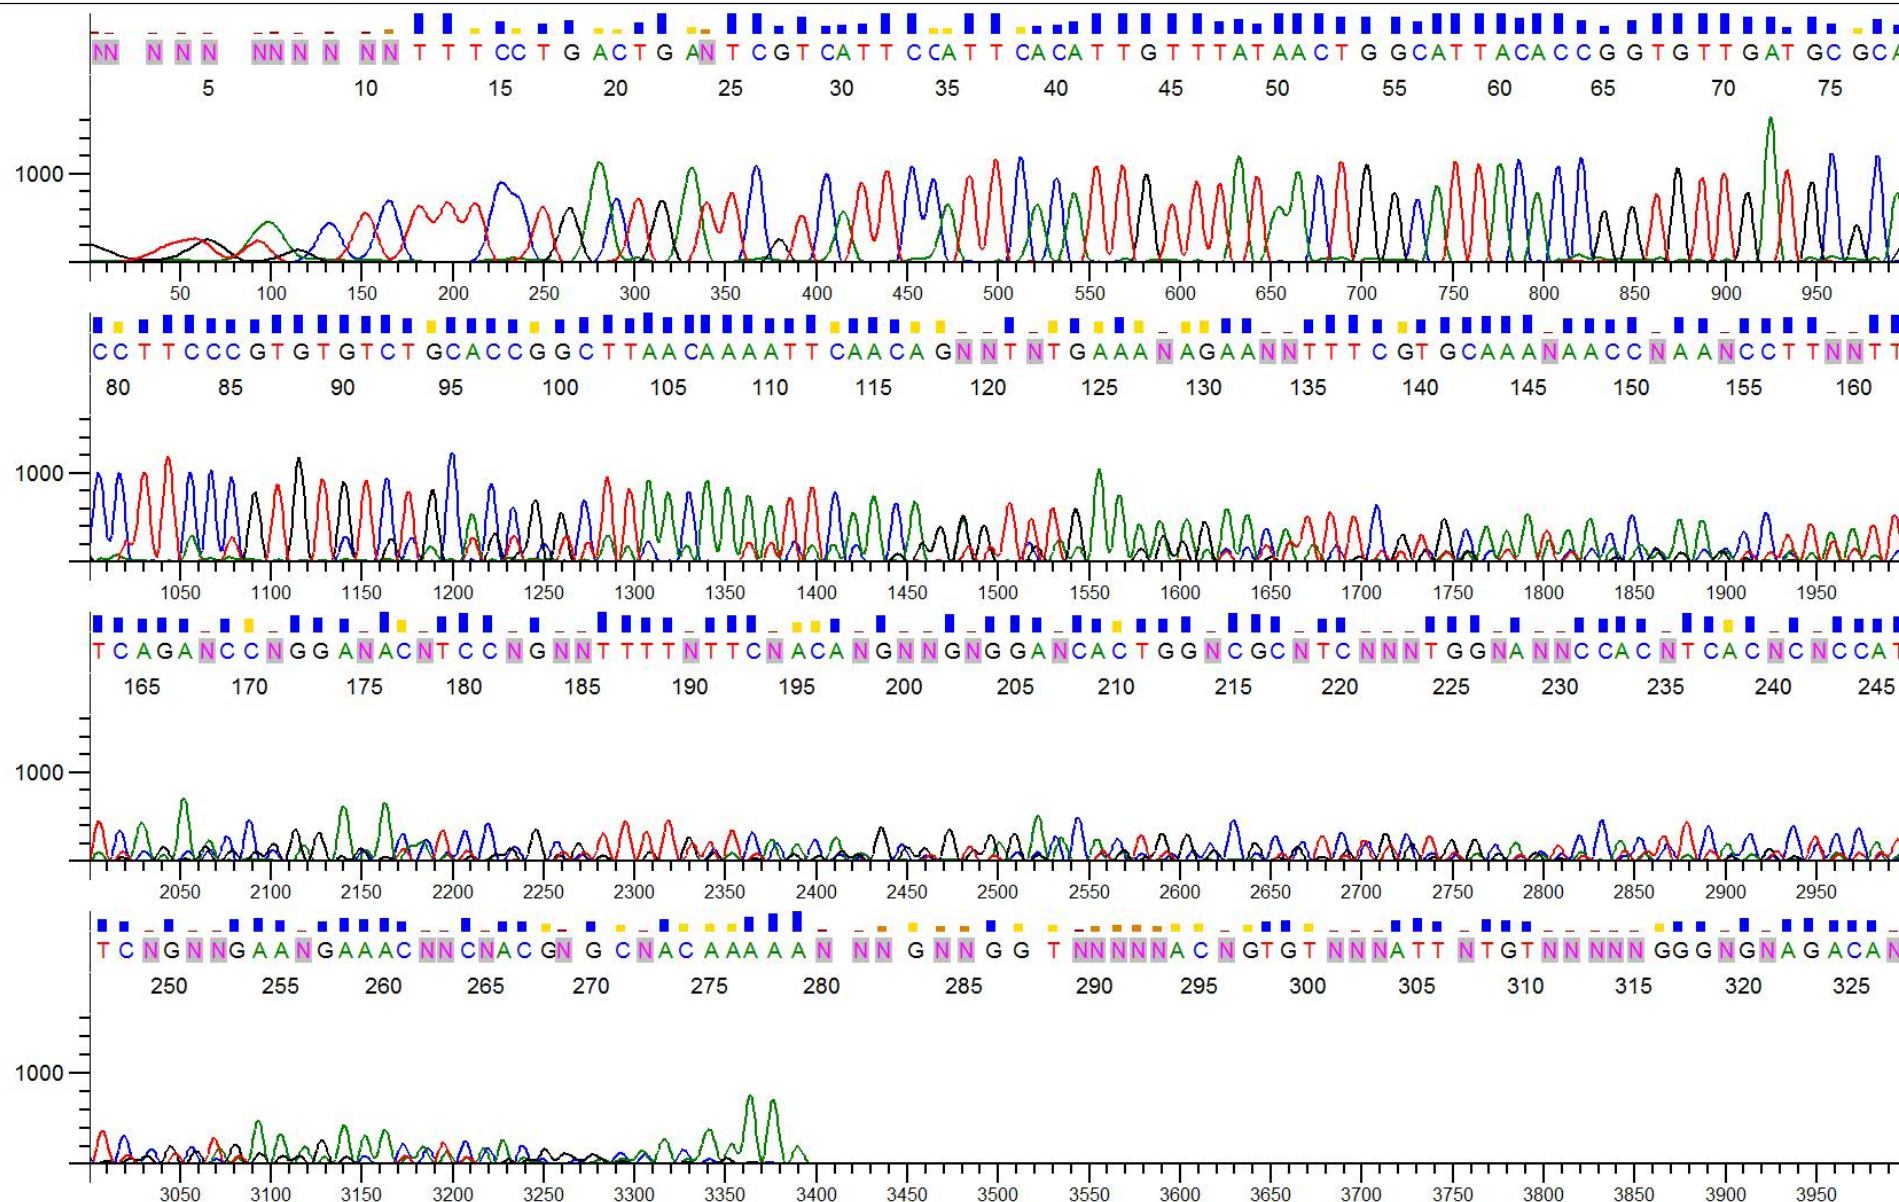

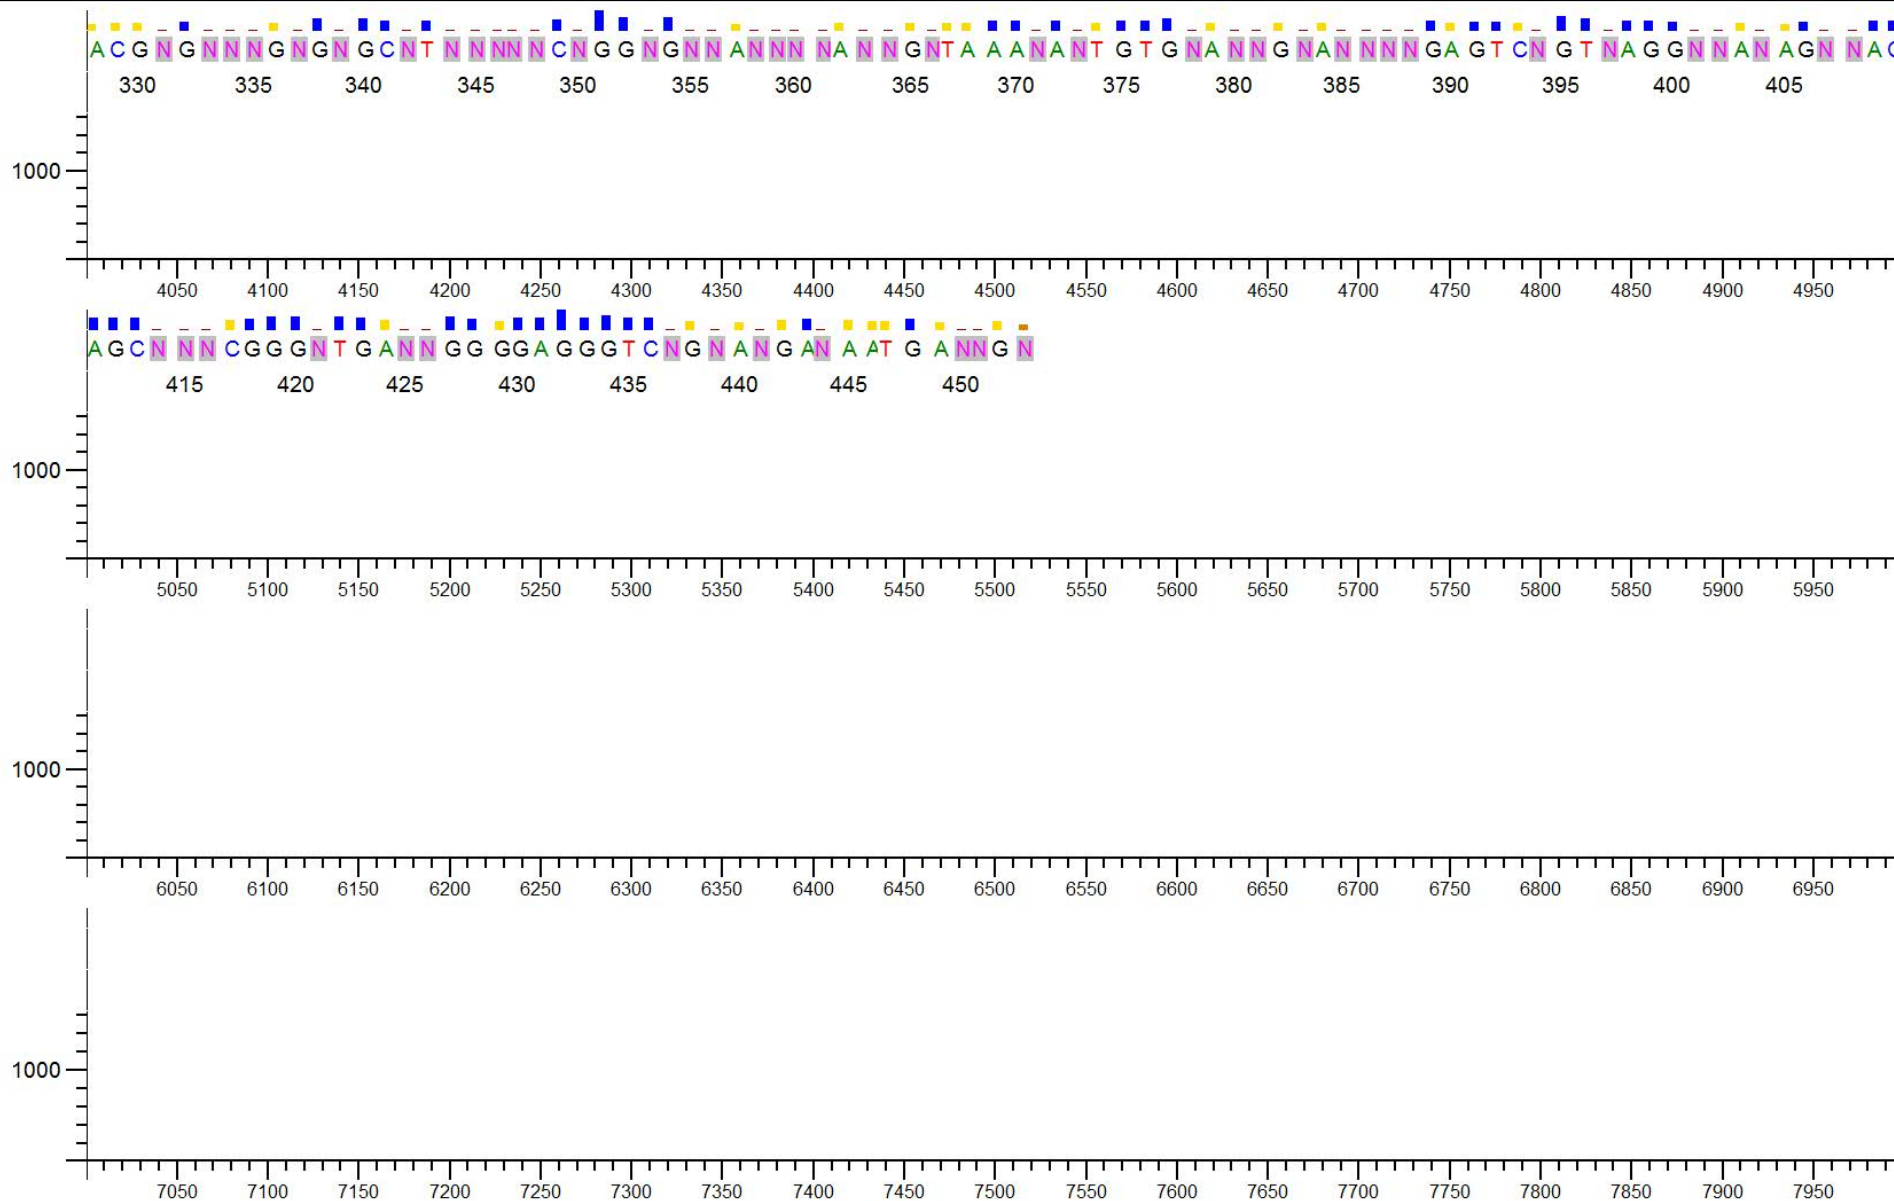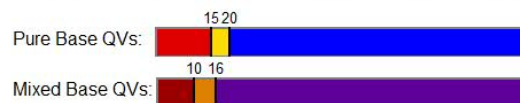

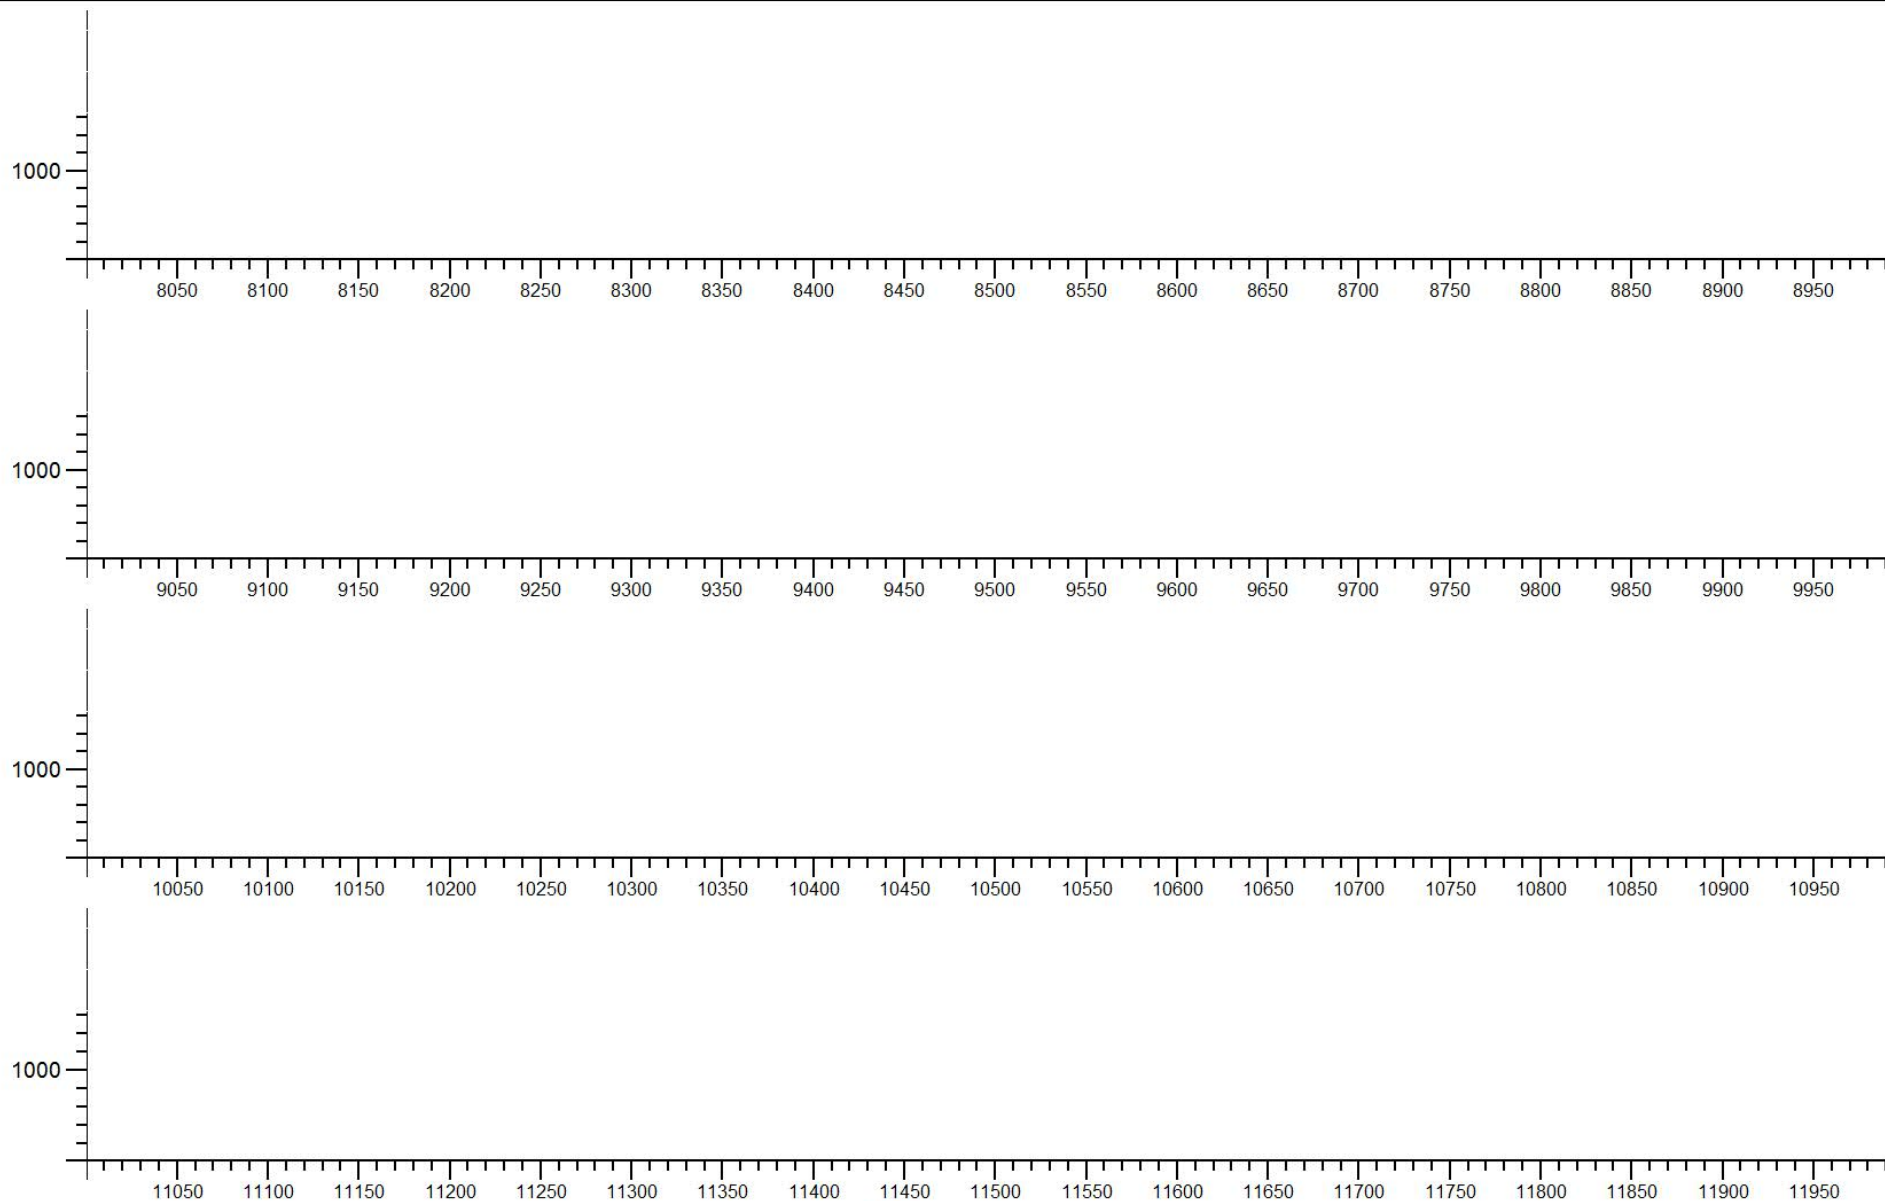

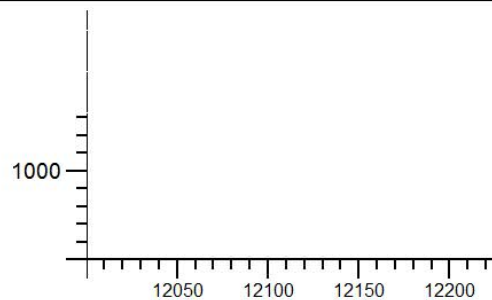

Supplement: raw_material.zip [file raw_material.zip]

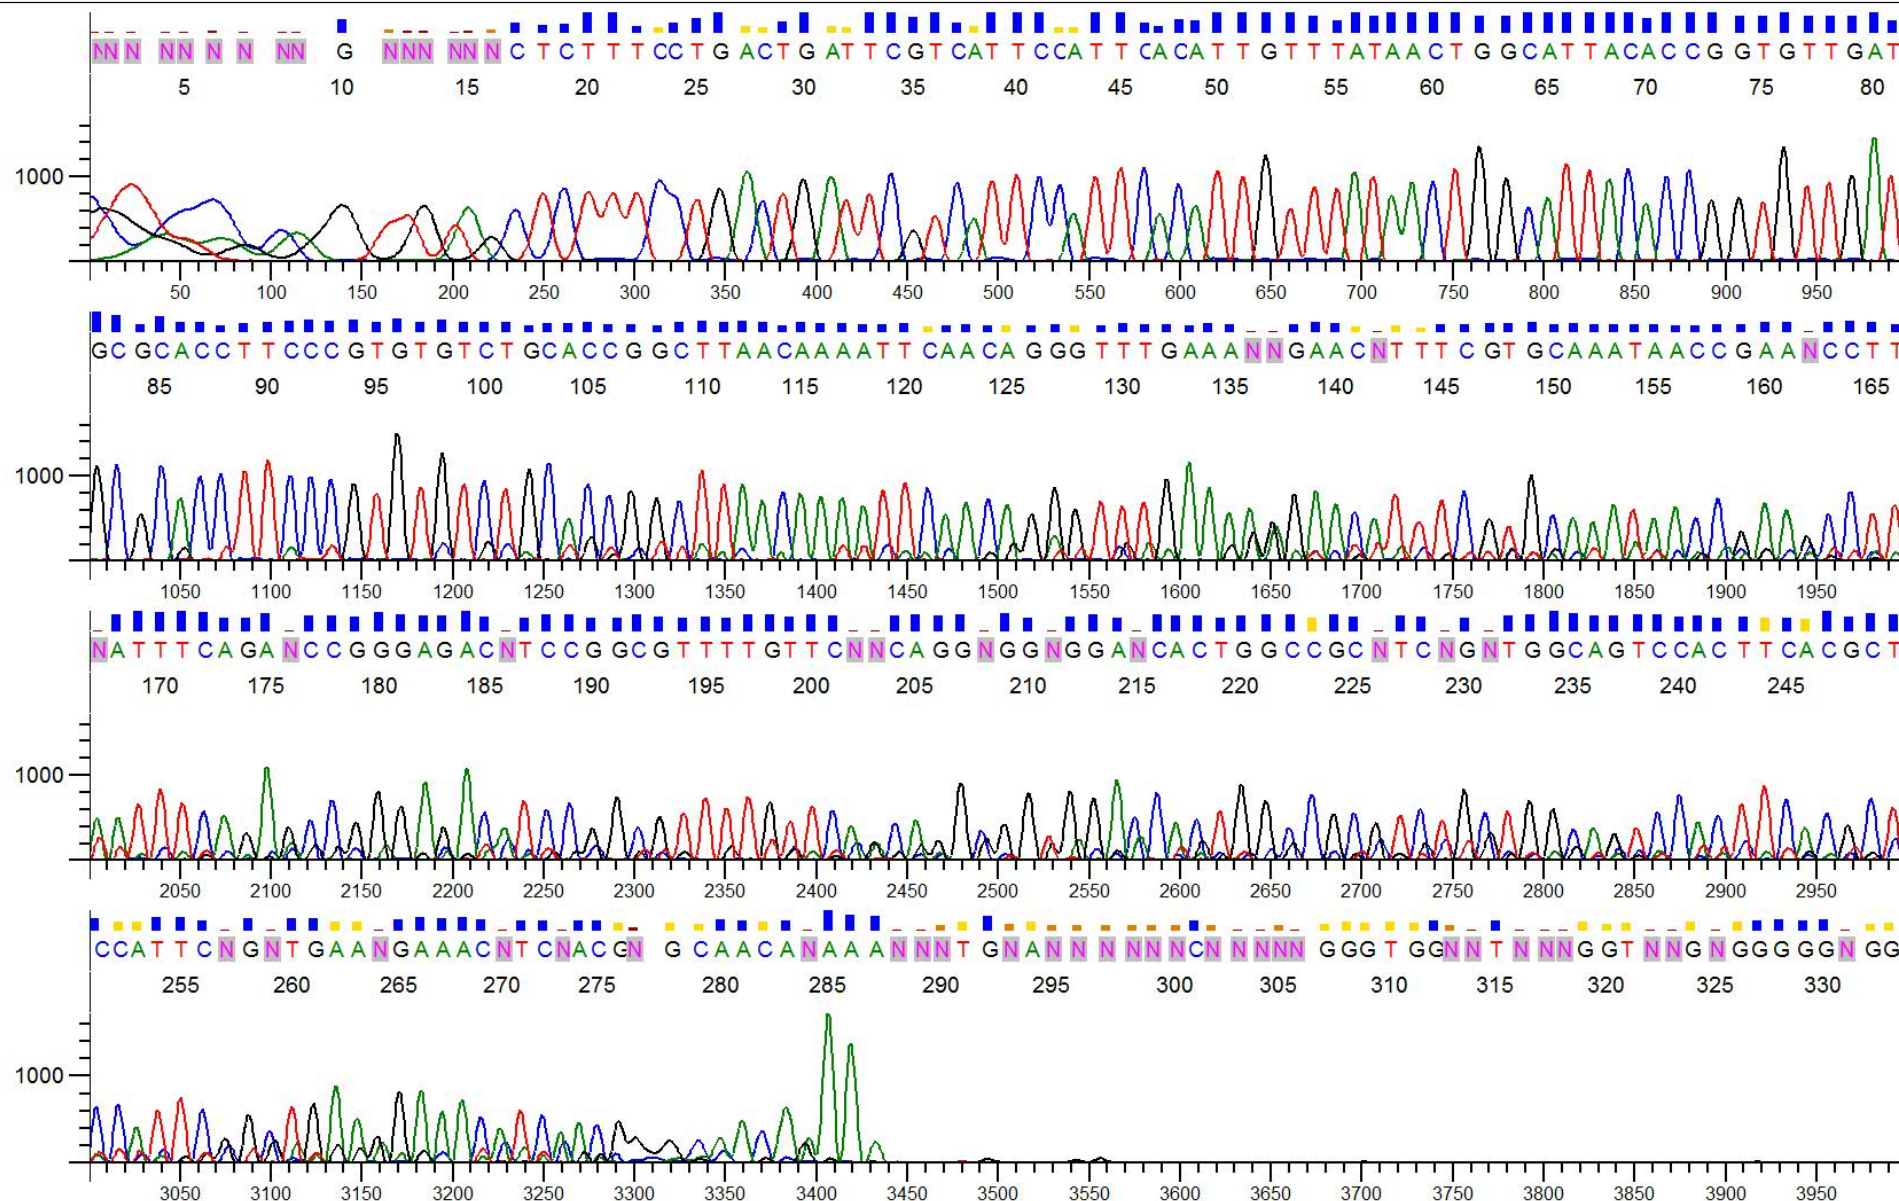

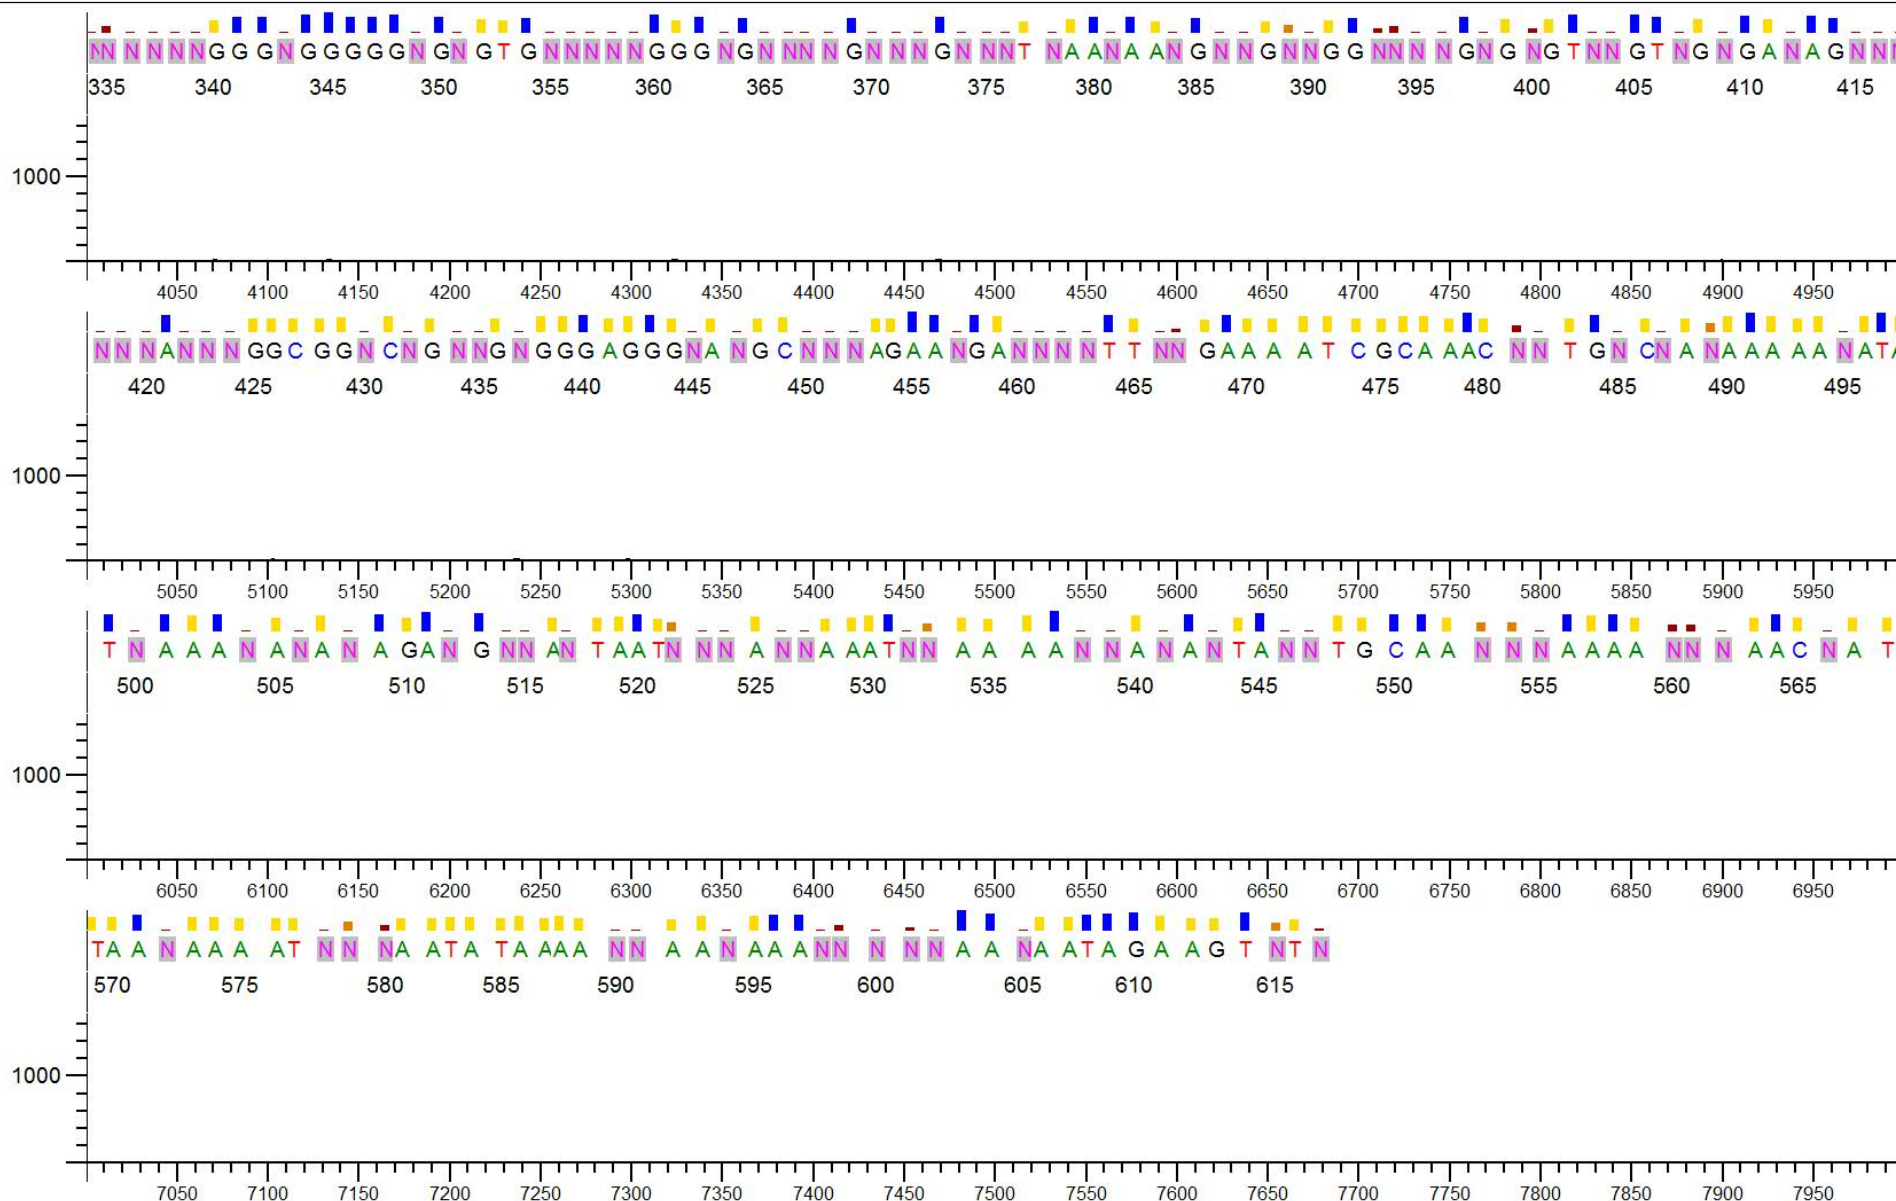



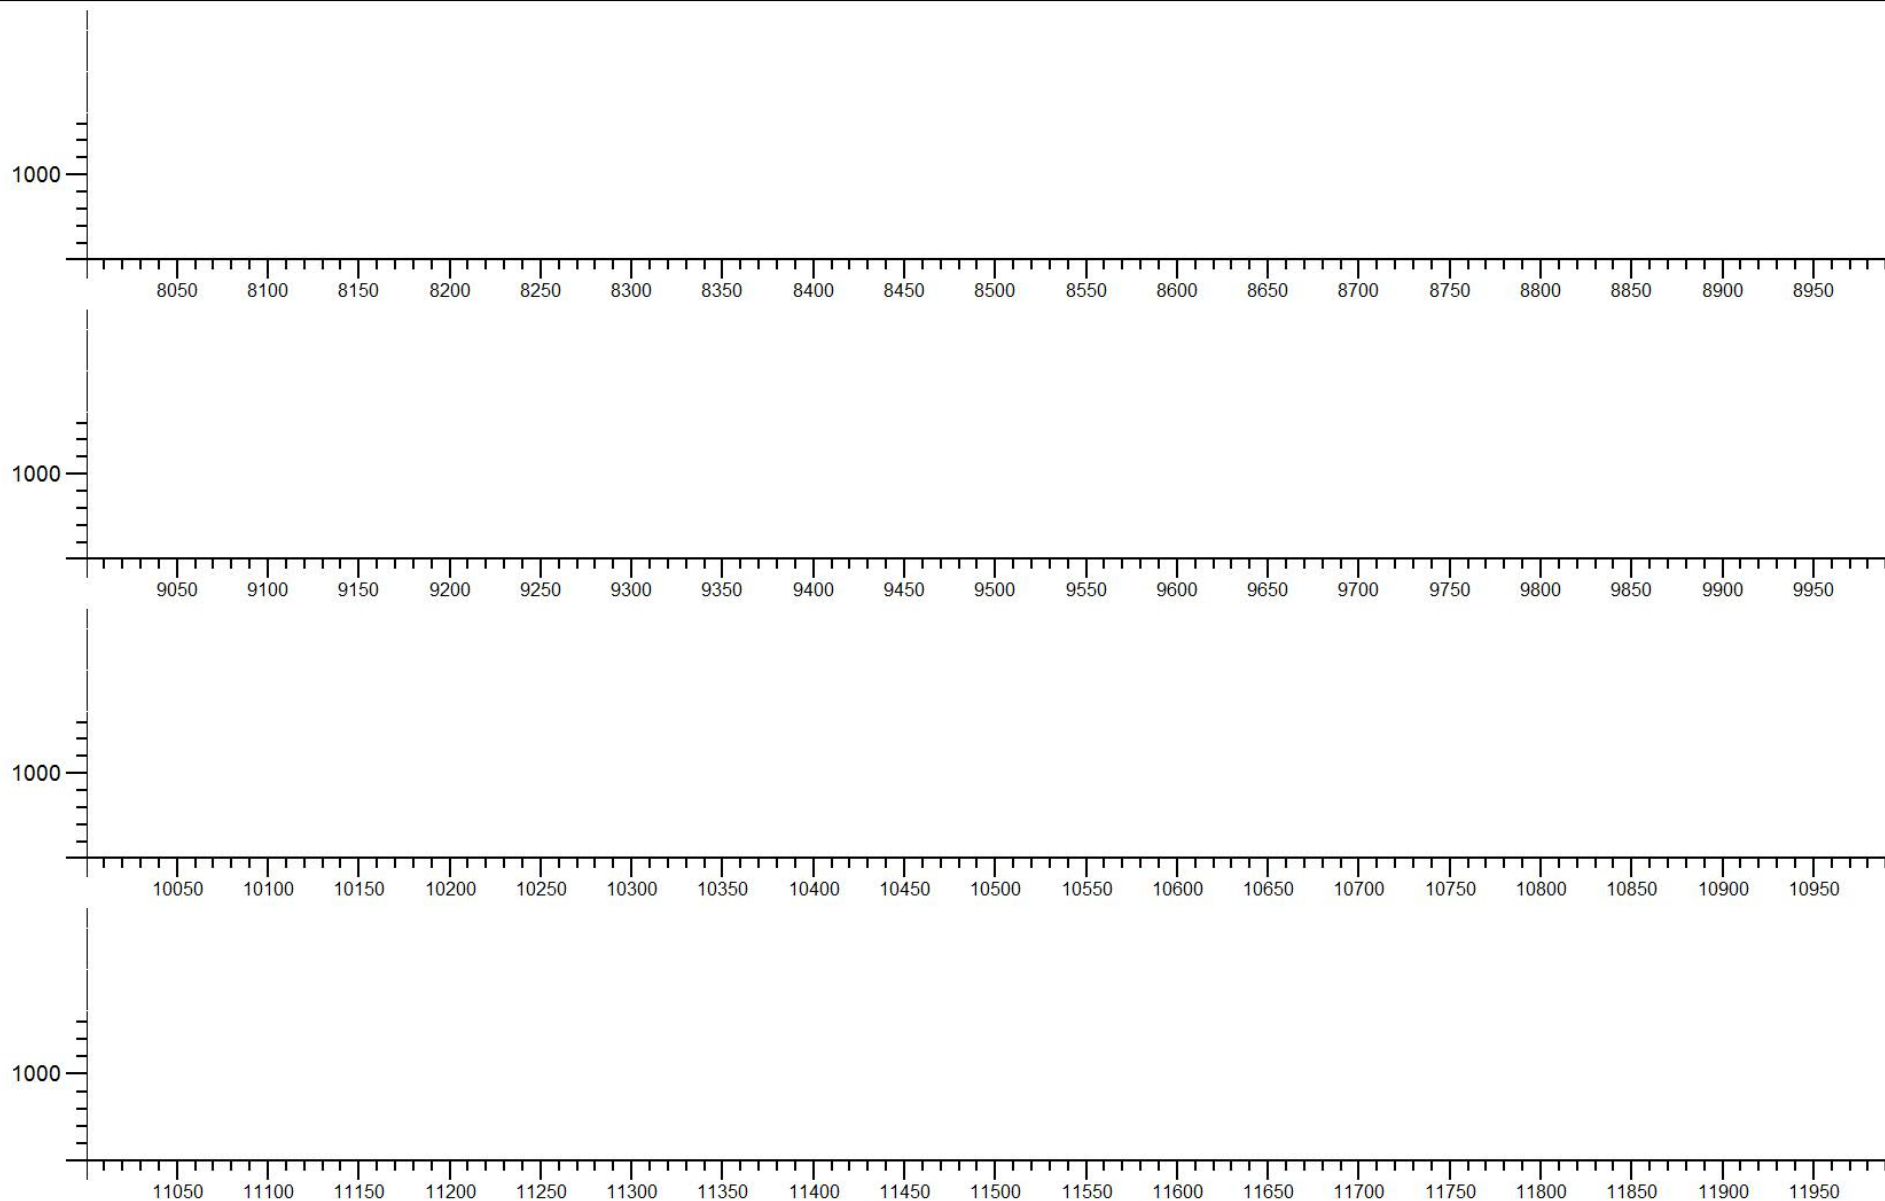

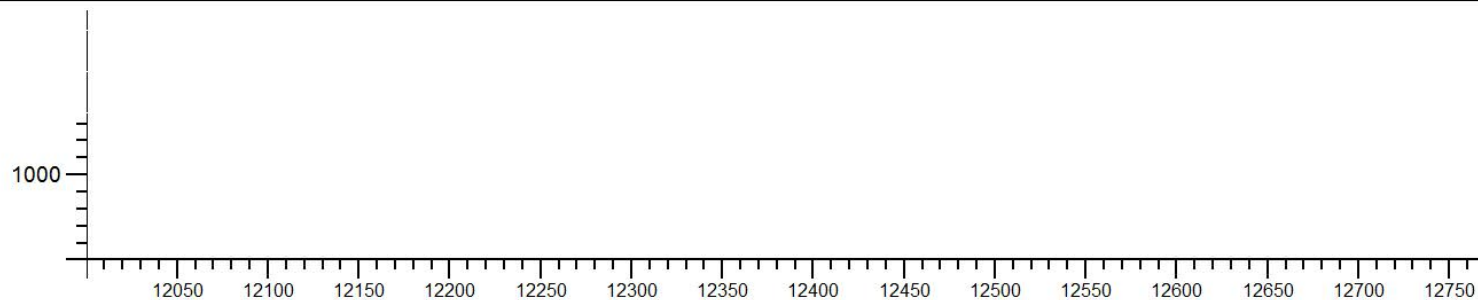

Supplement: raw_material.zip [file raw_material.zip]

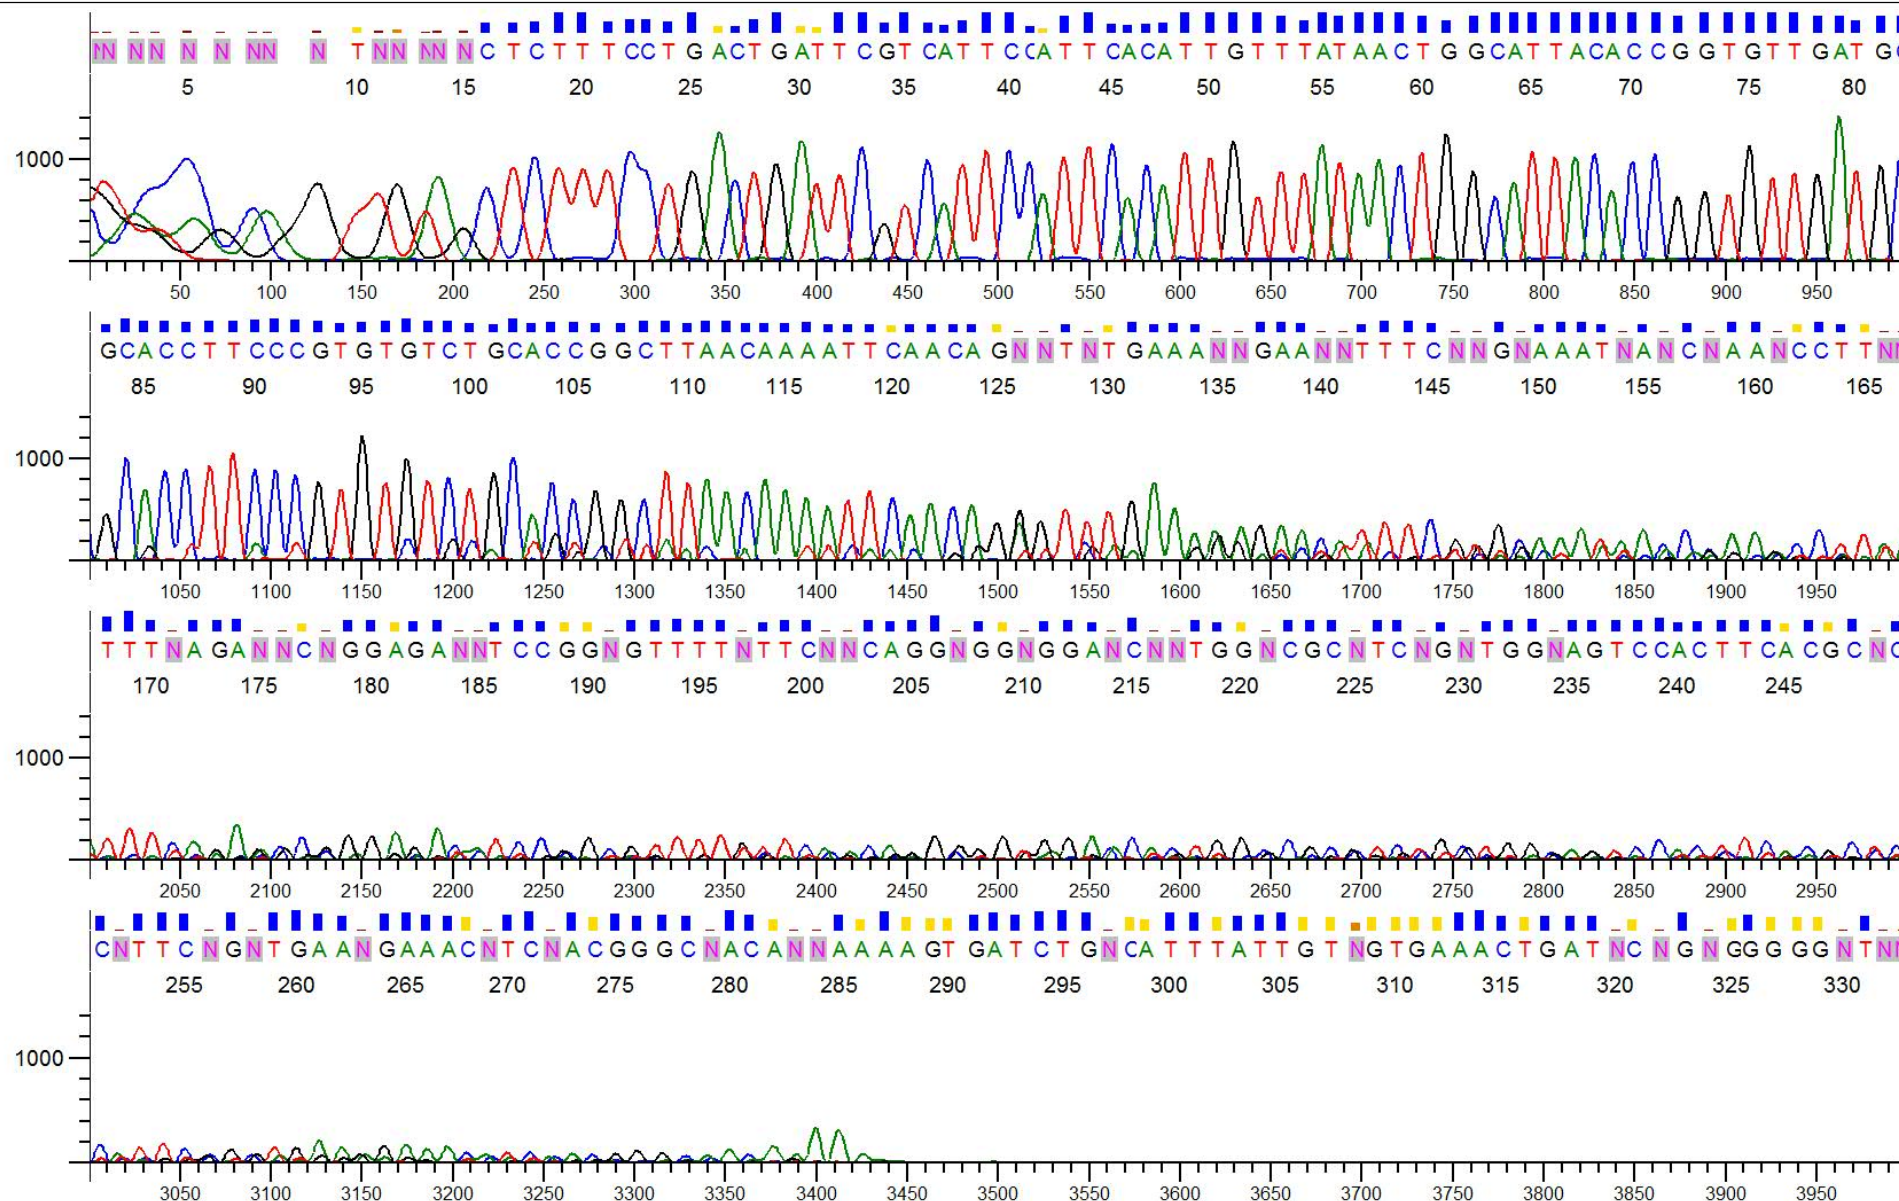

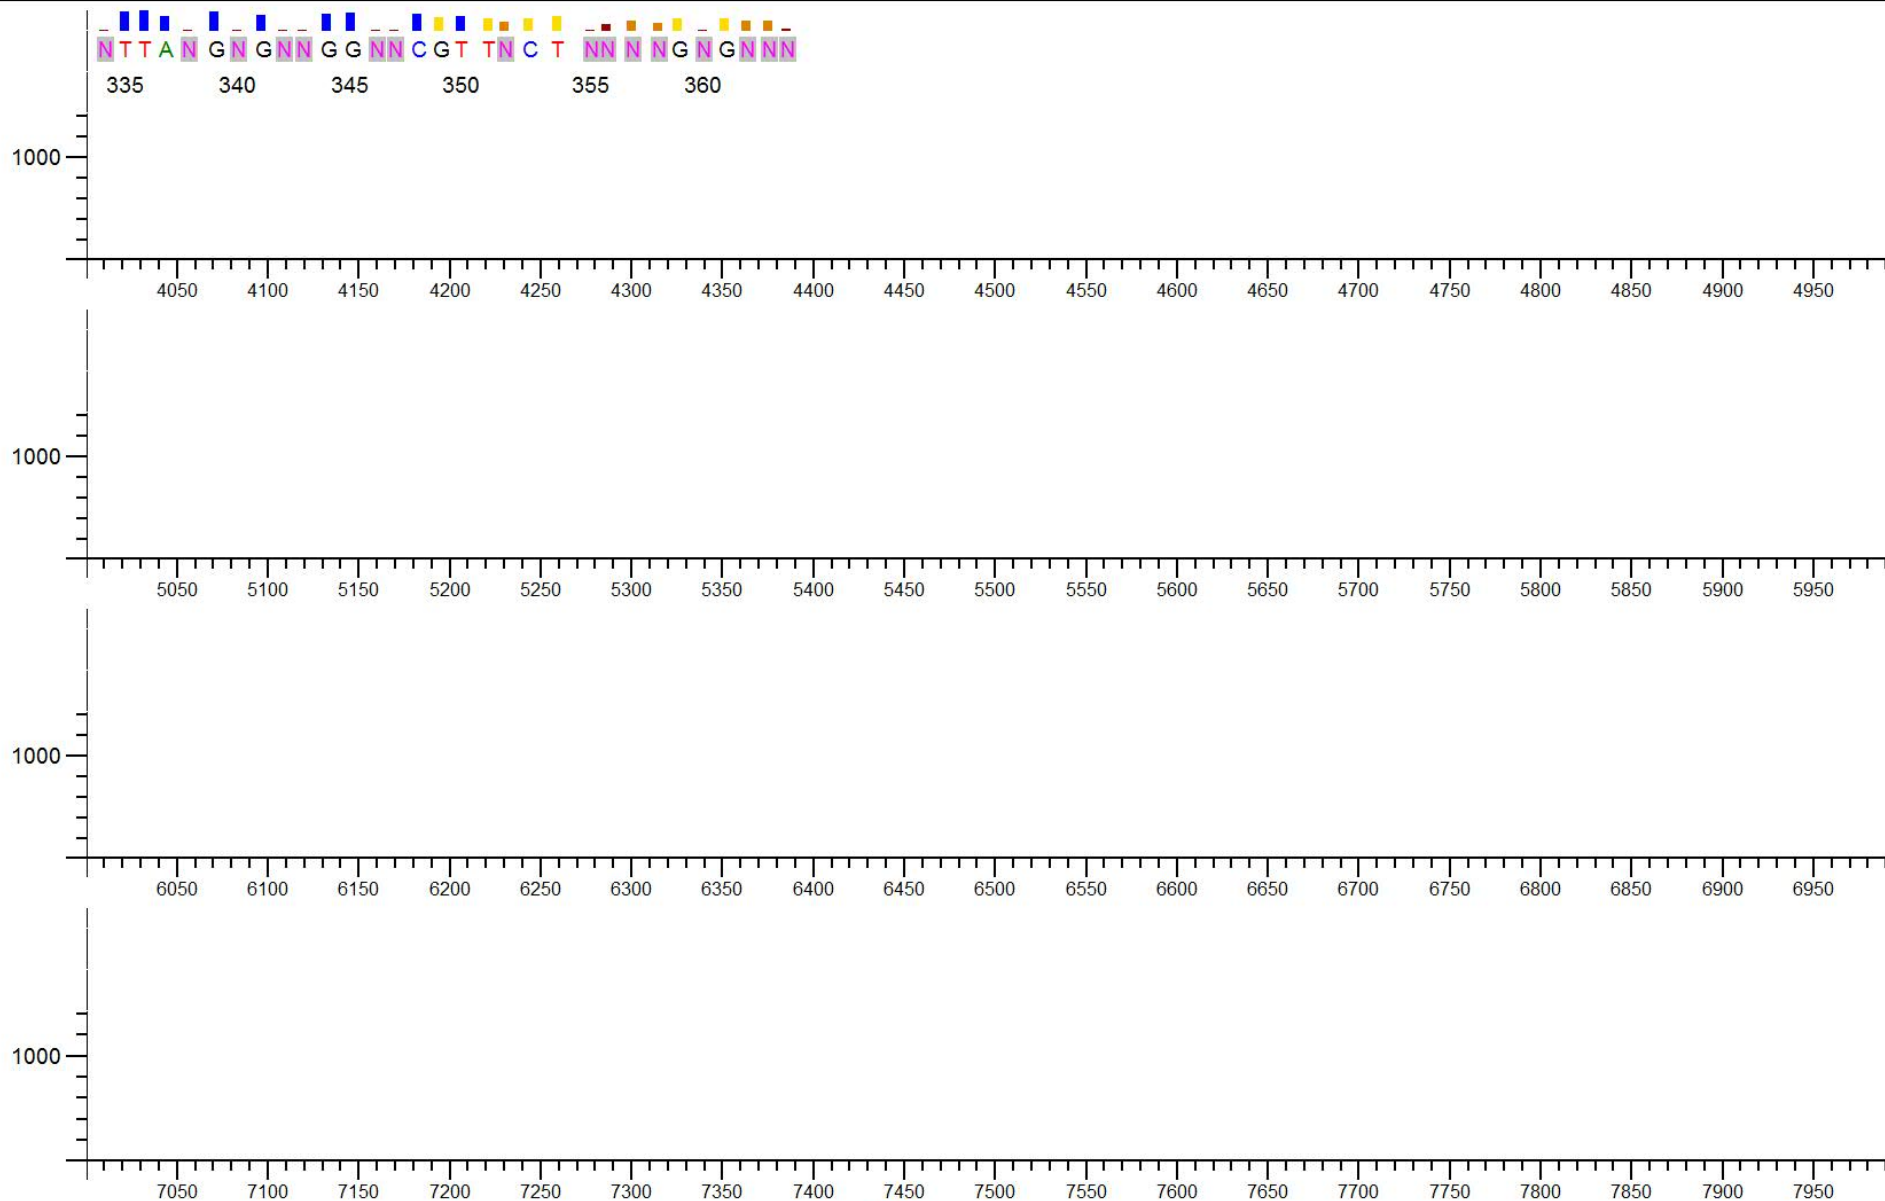

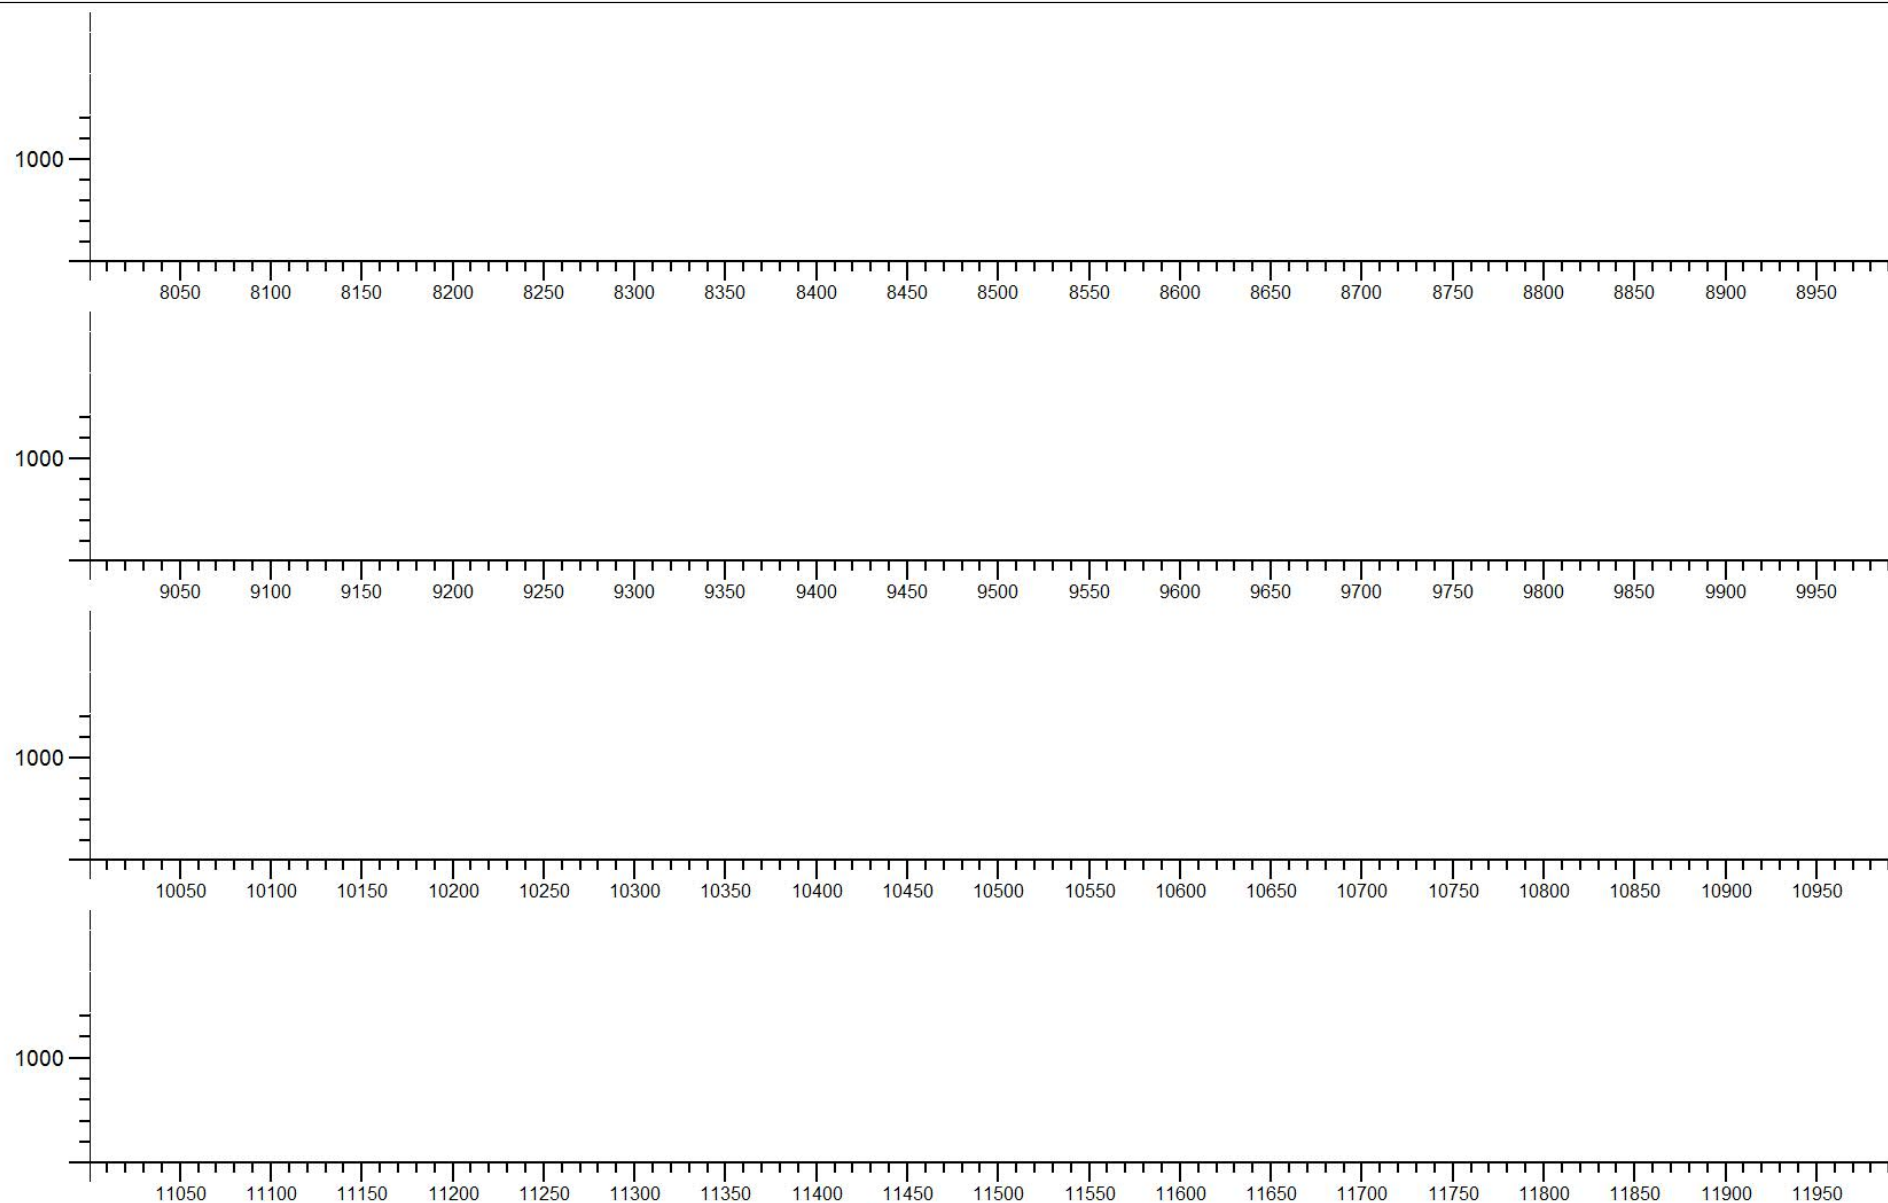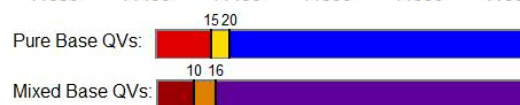

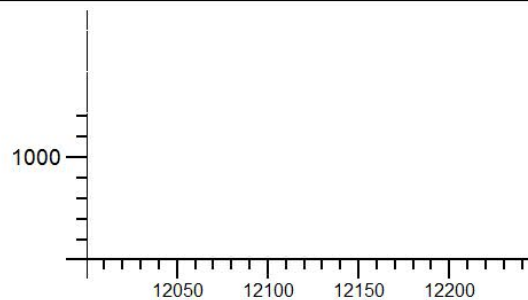

Supplement: raw_material.zip [file raw_material.zip]

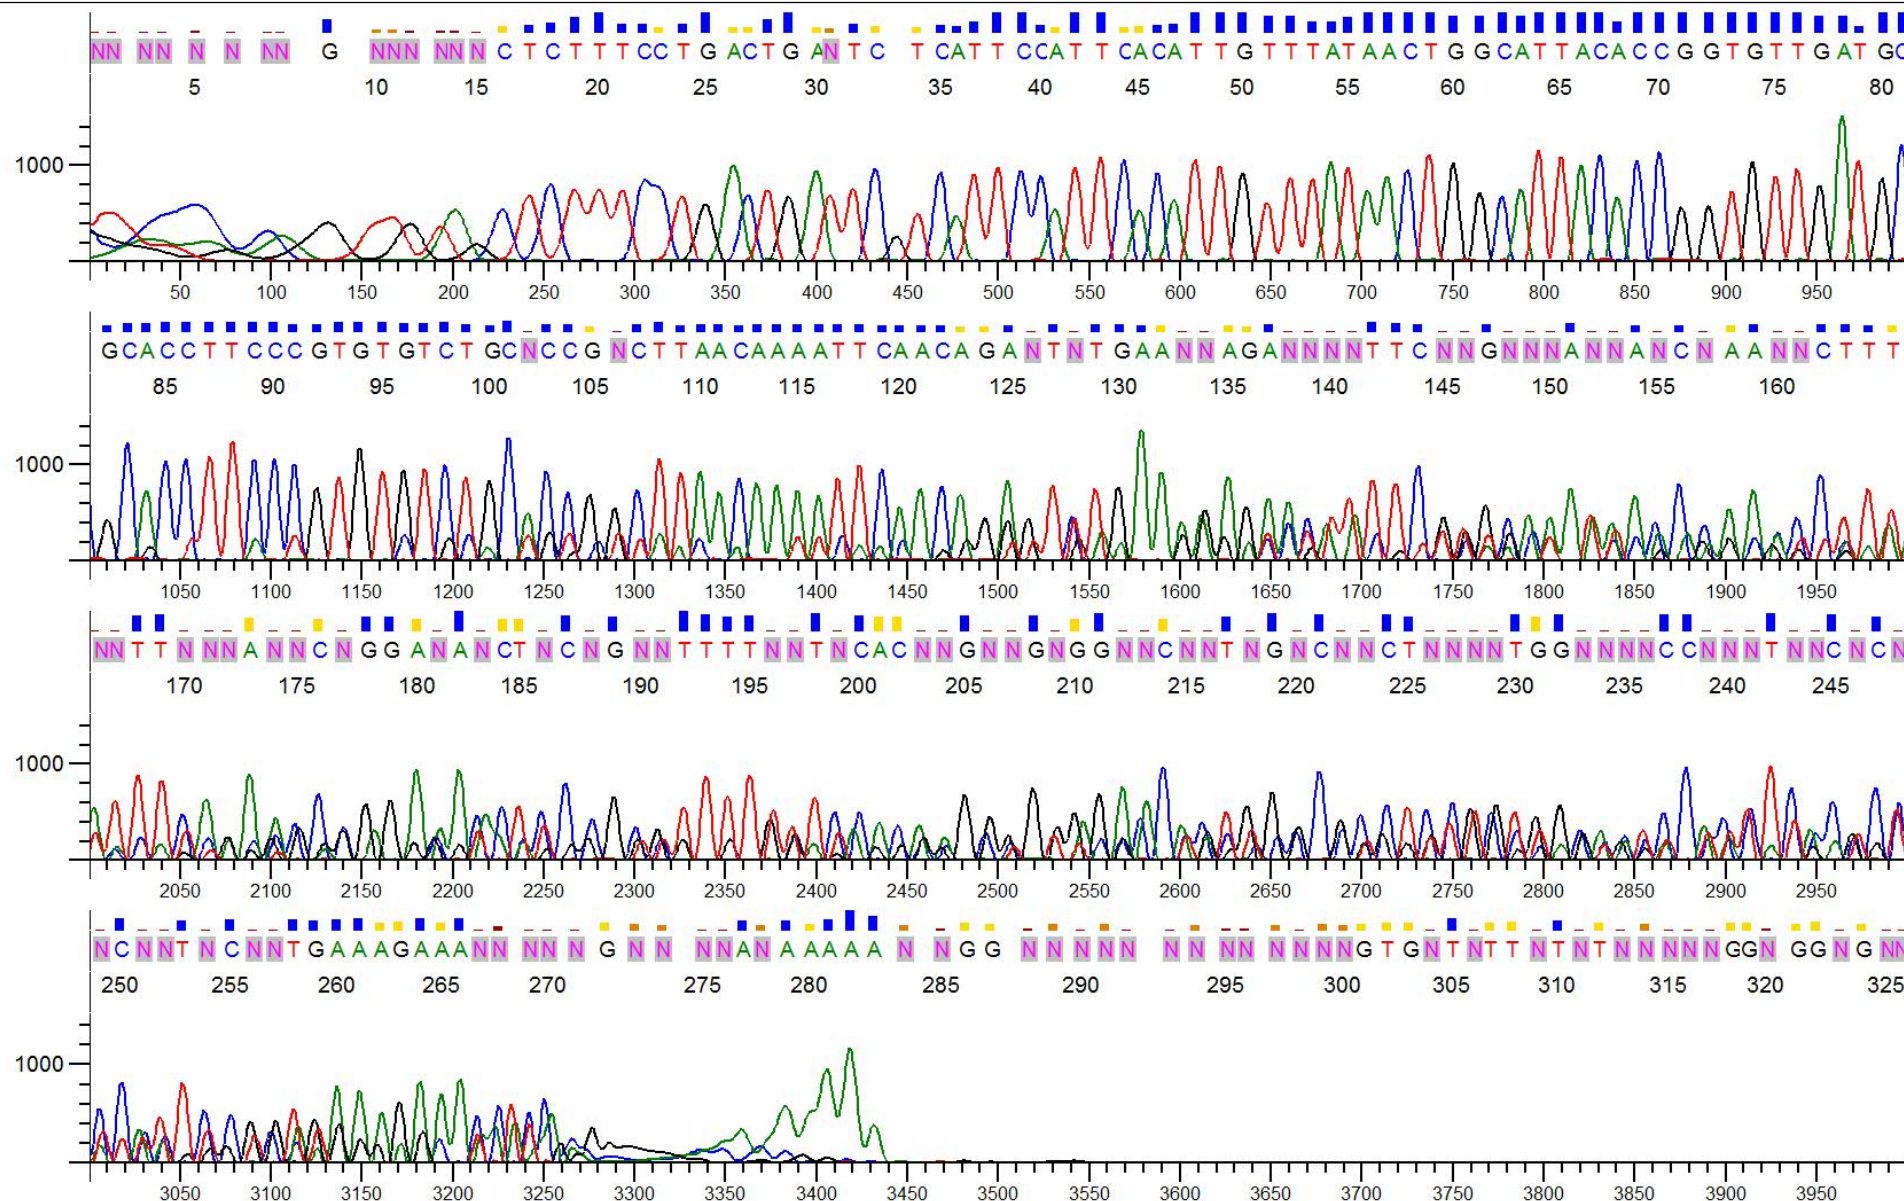

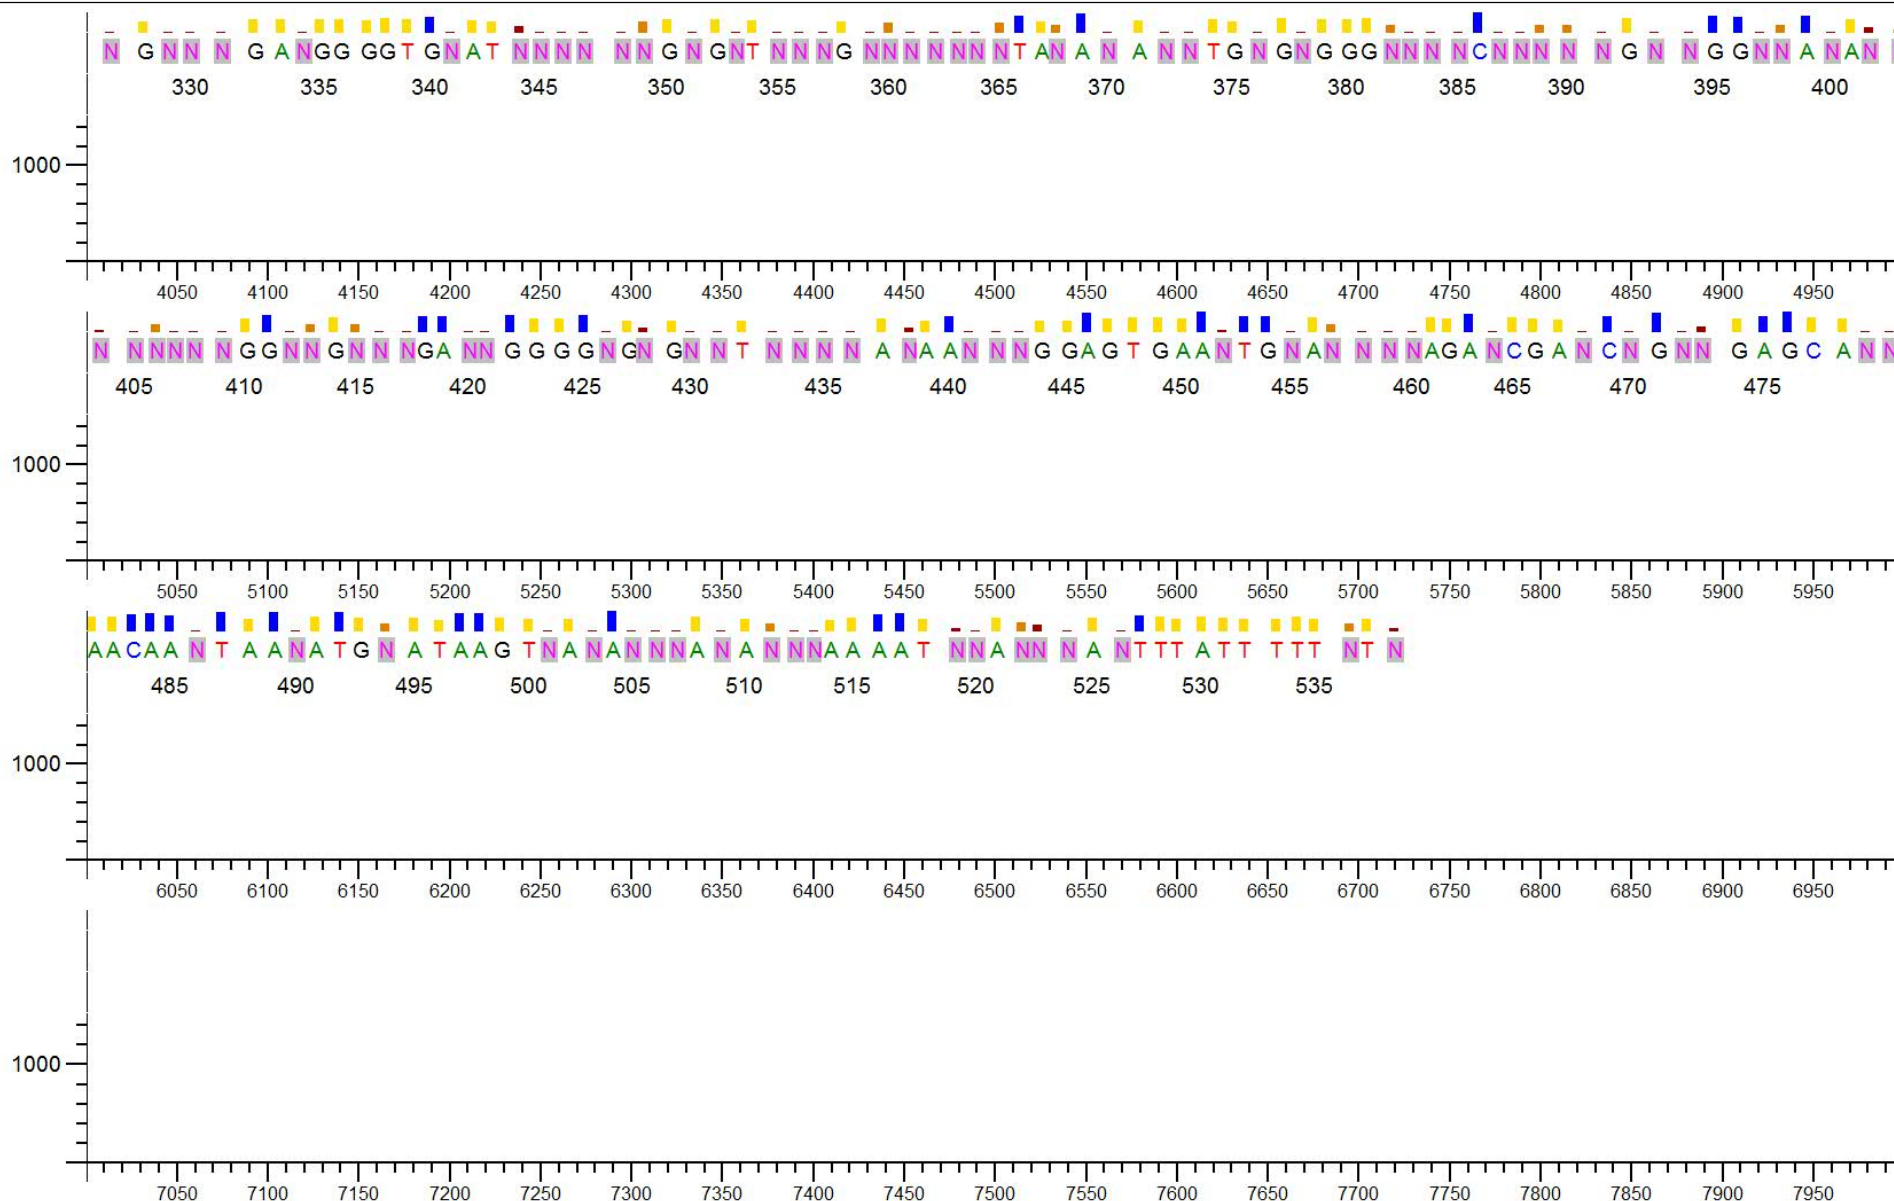

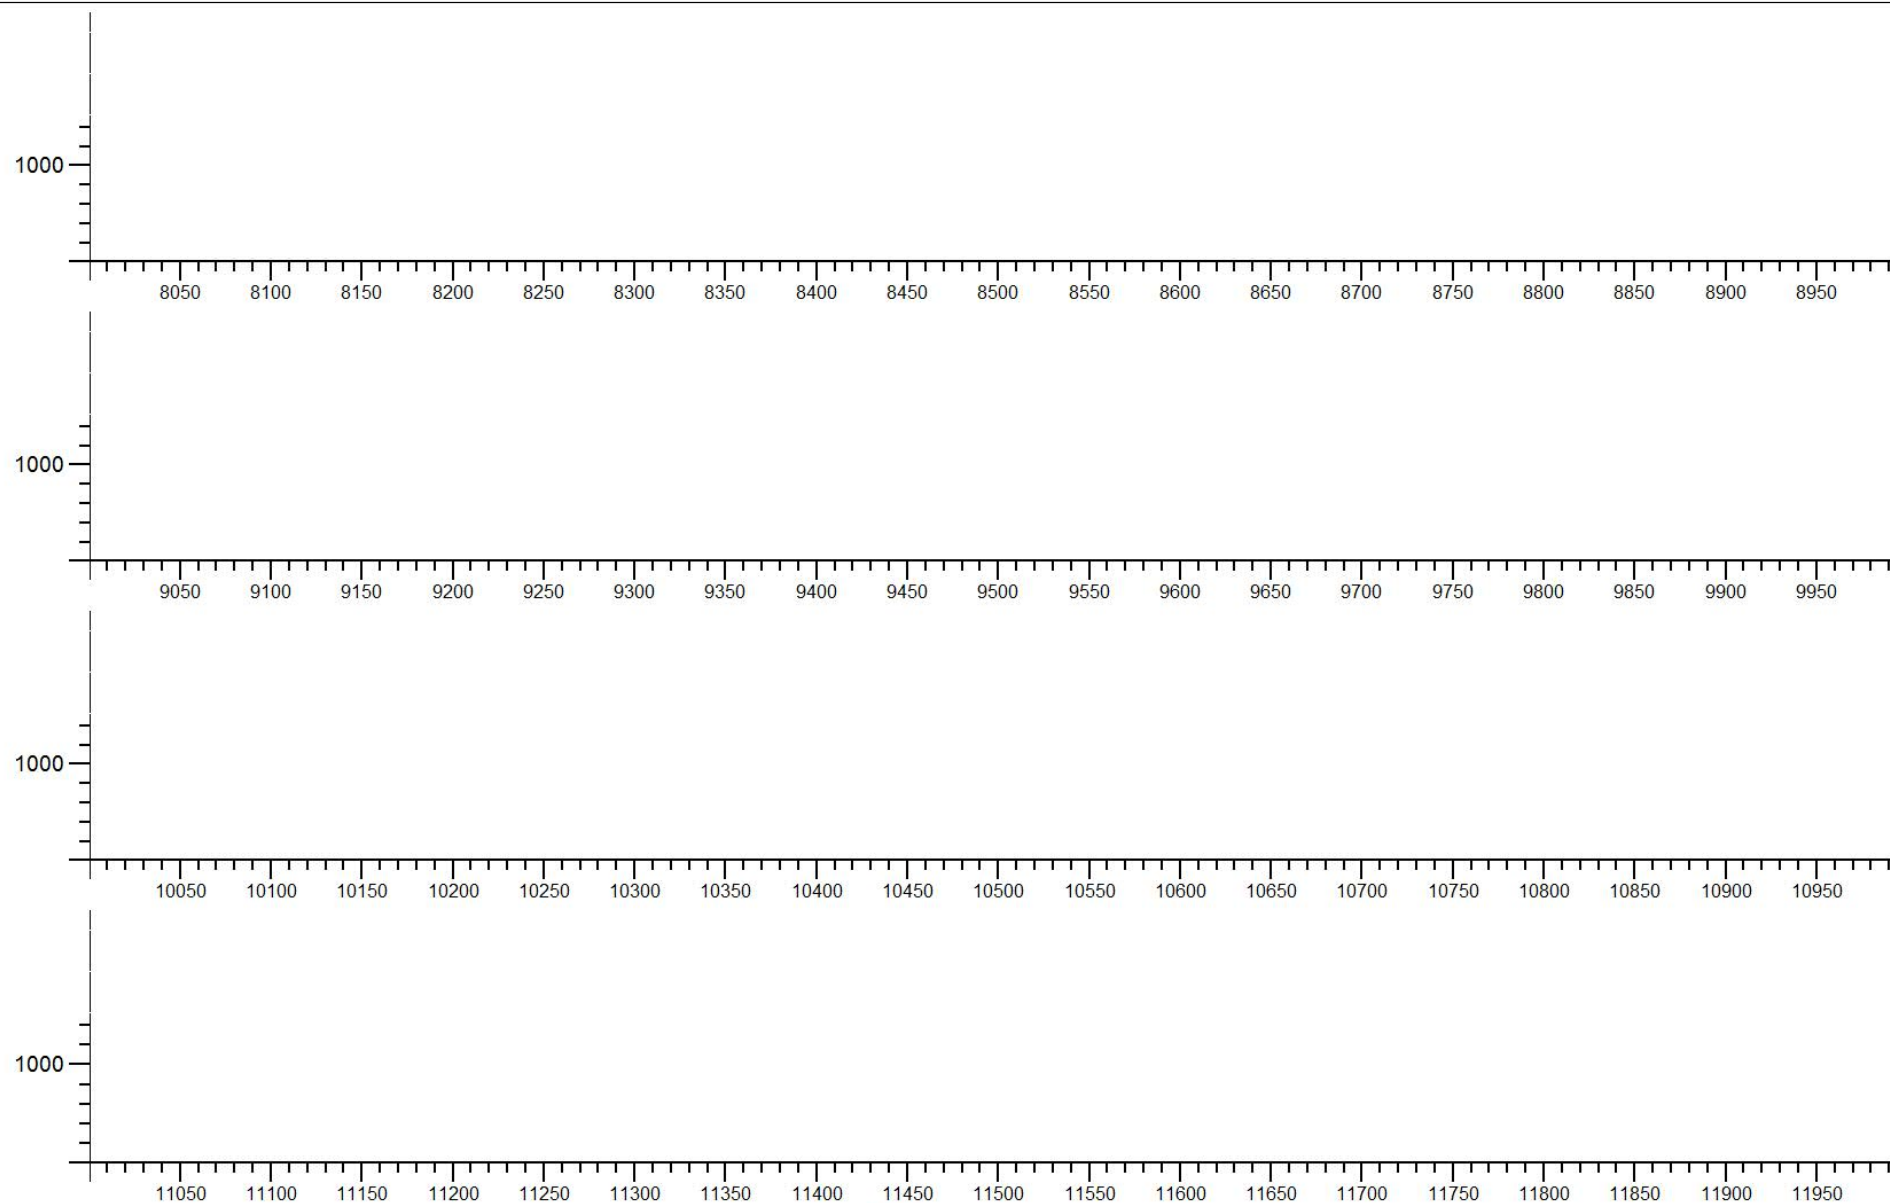



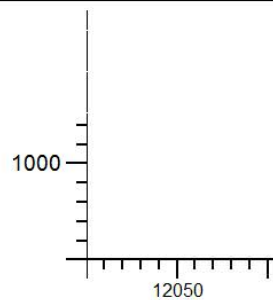

Supplement: raw_material.zip [file raw_material.zip]

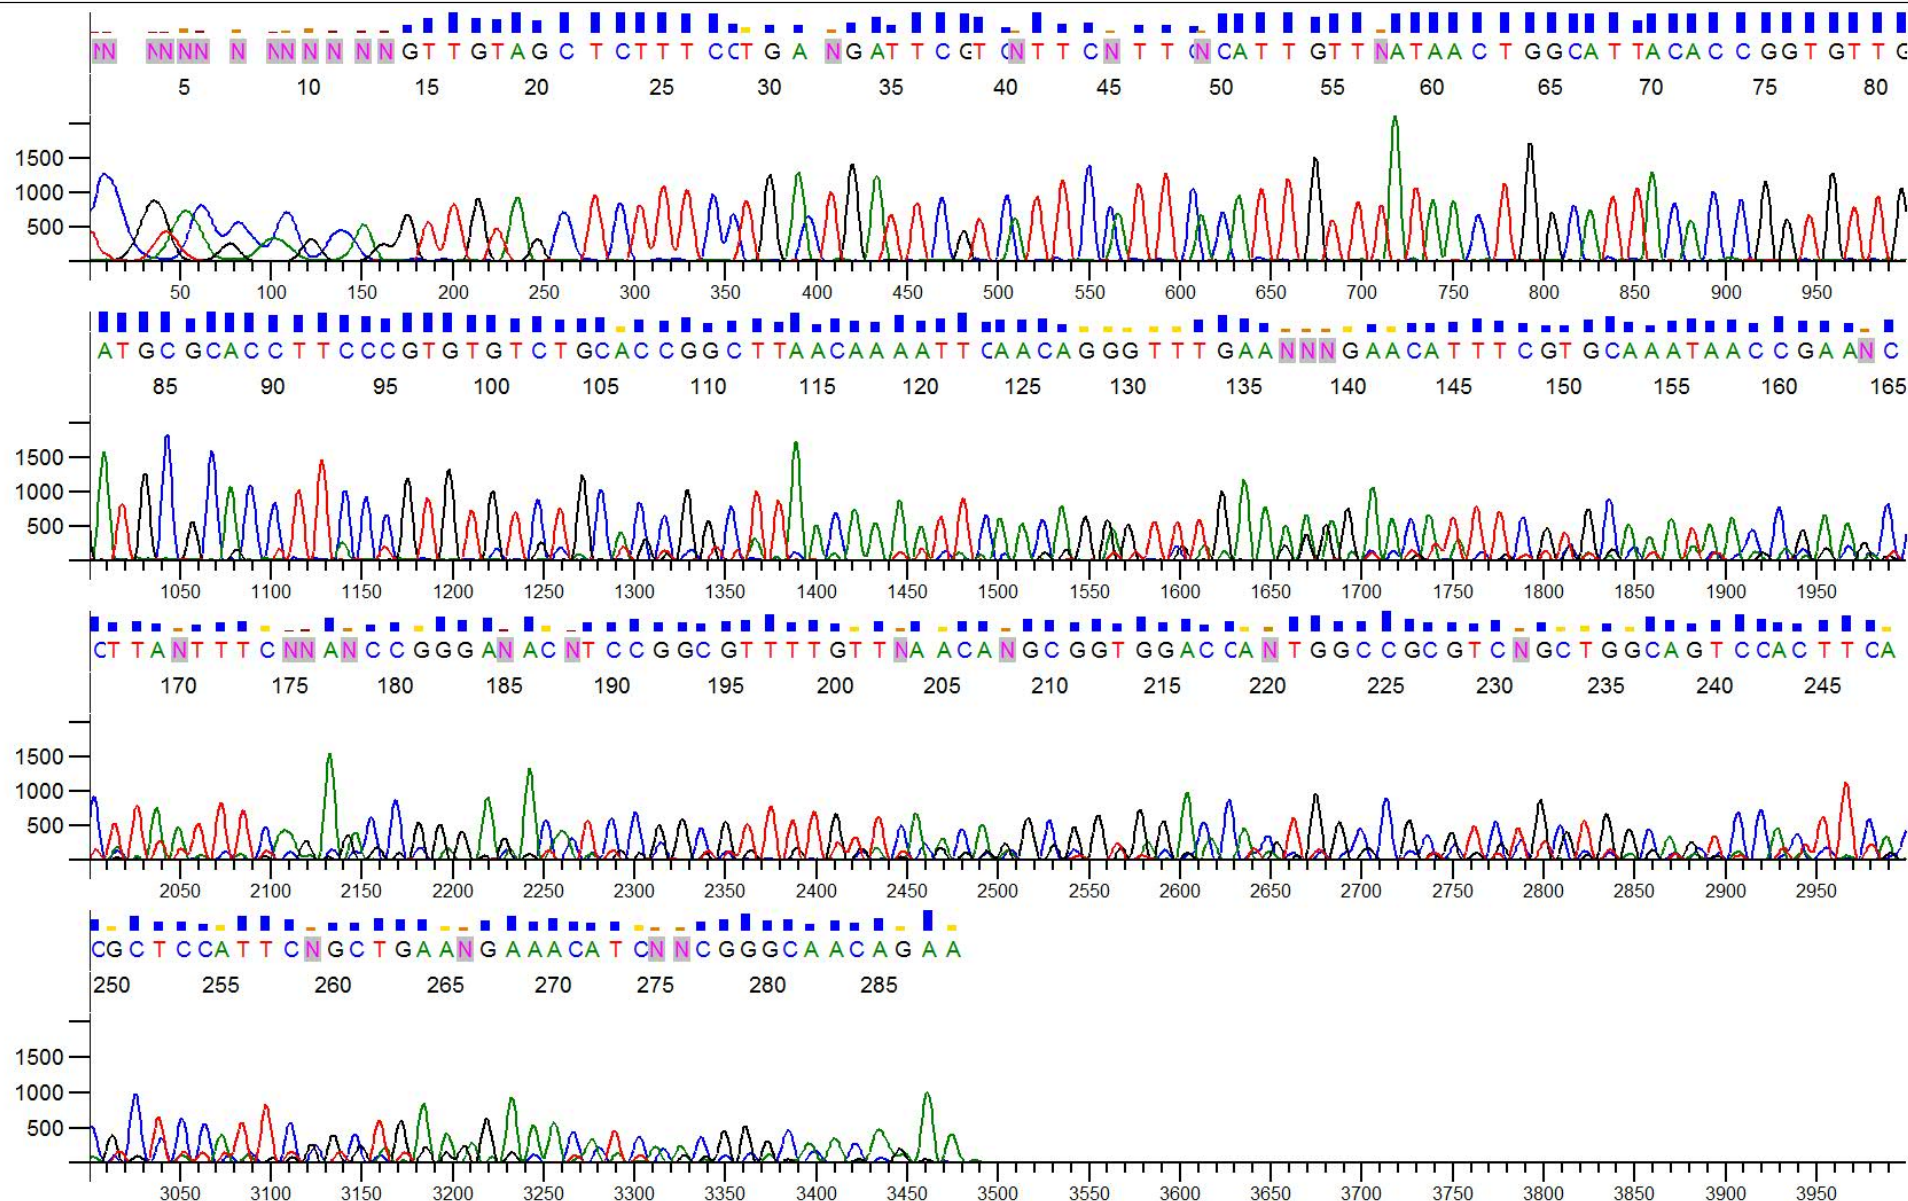

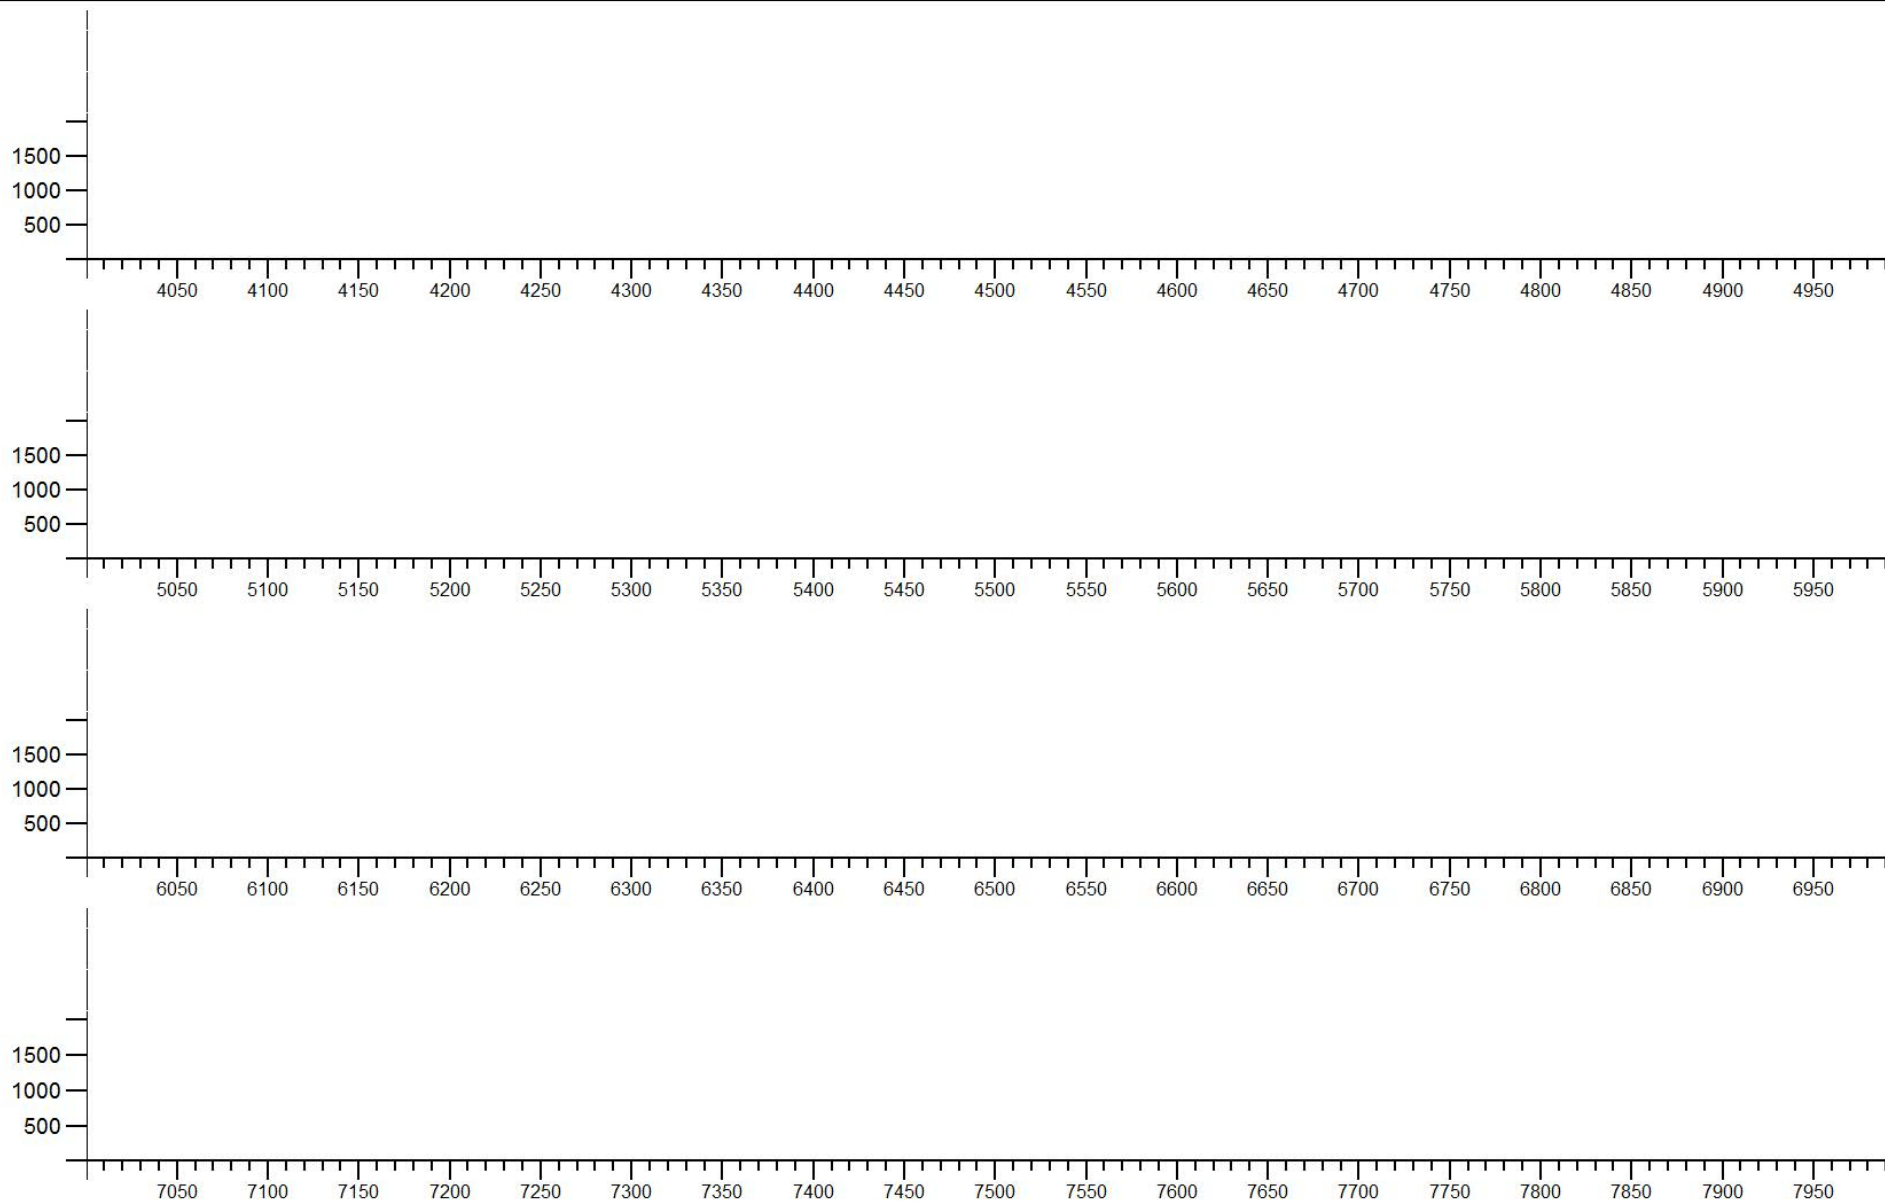

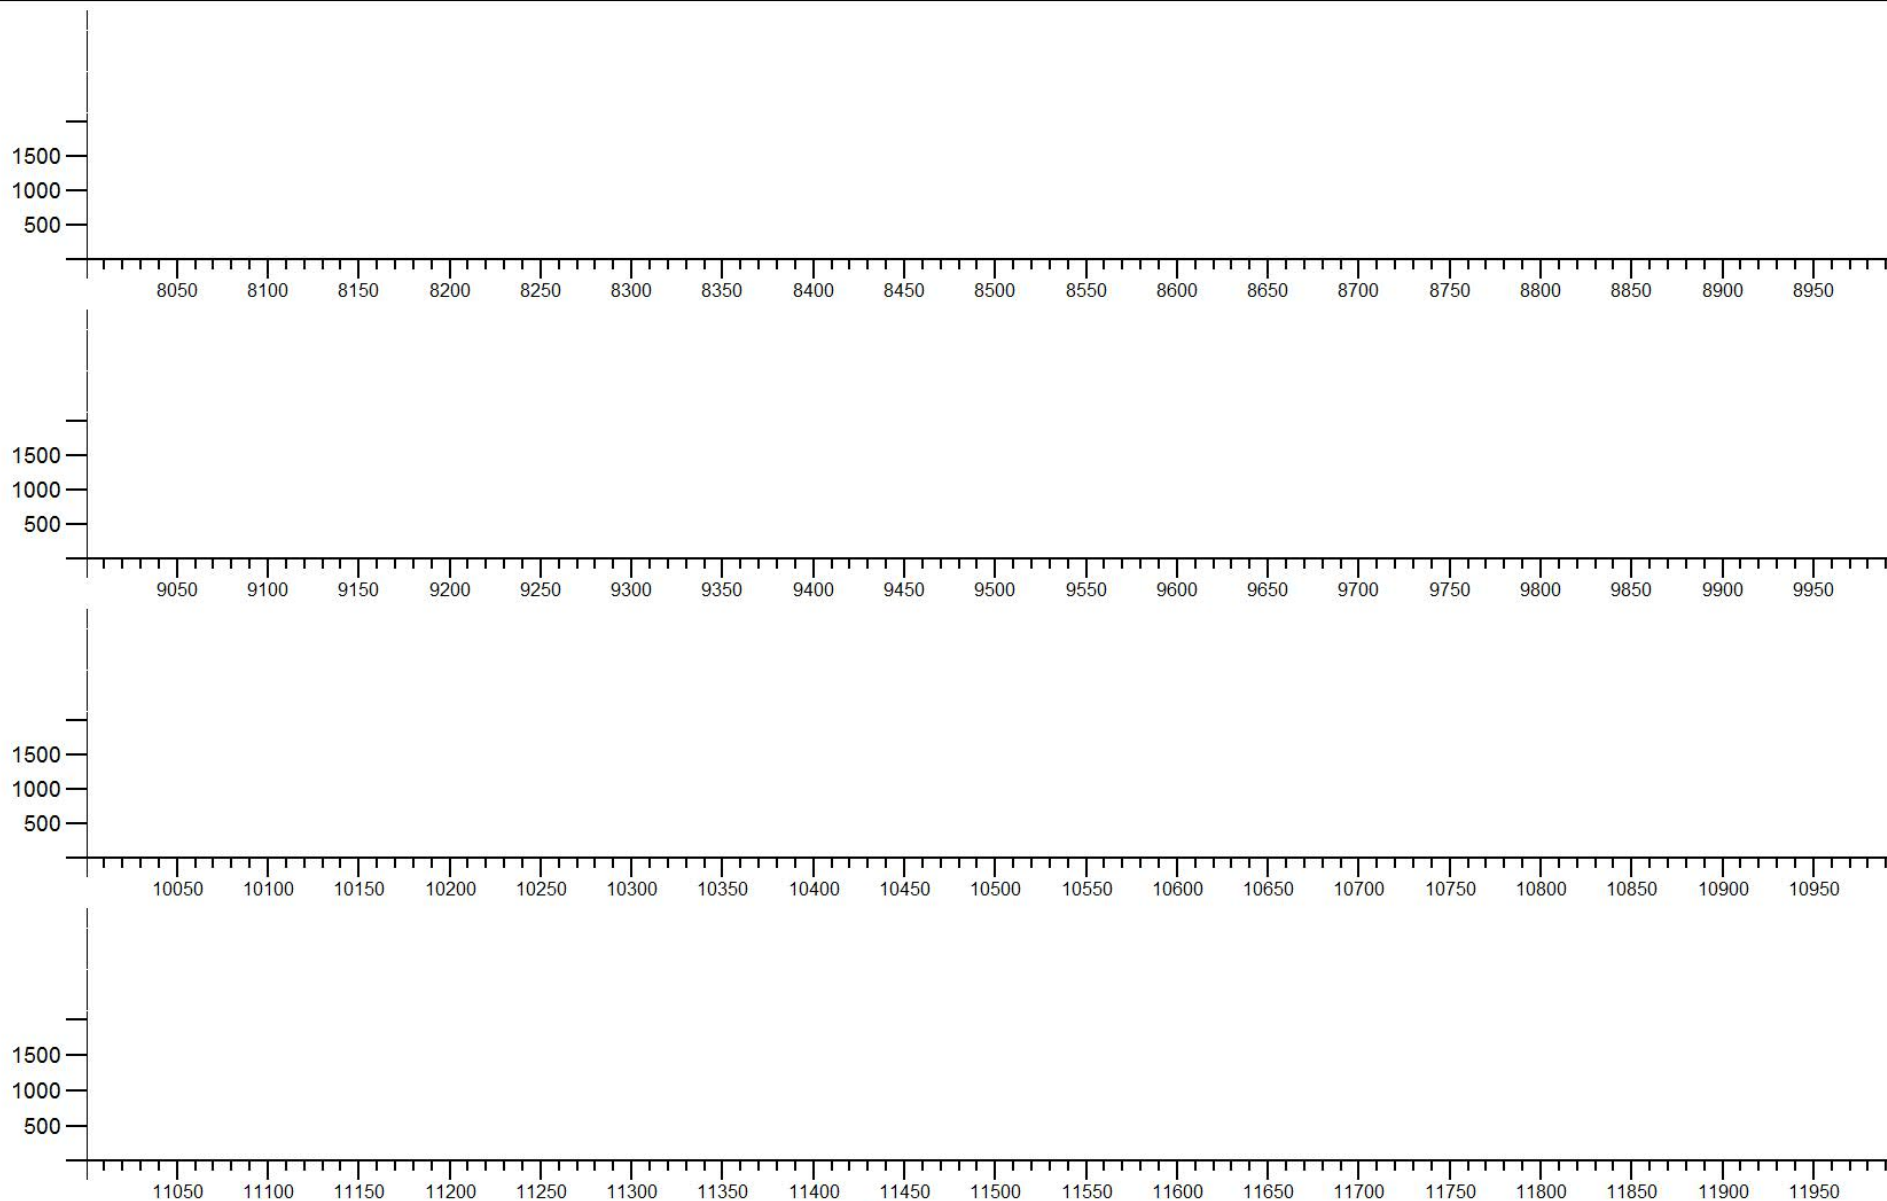

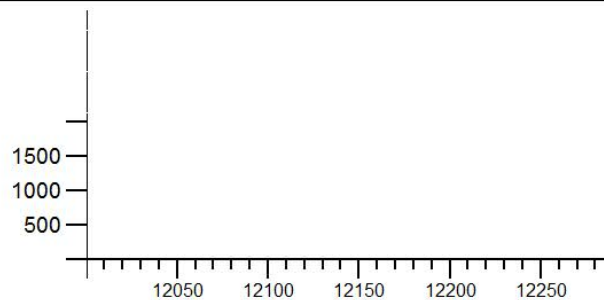

Supplement: raw_material.zip [file raw_material.zip]

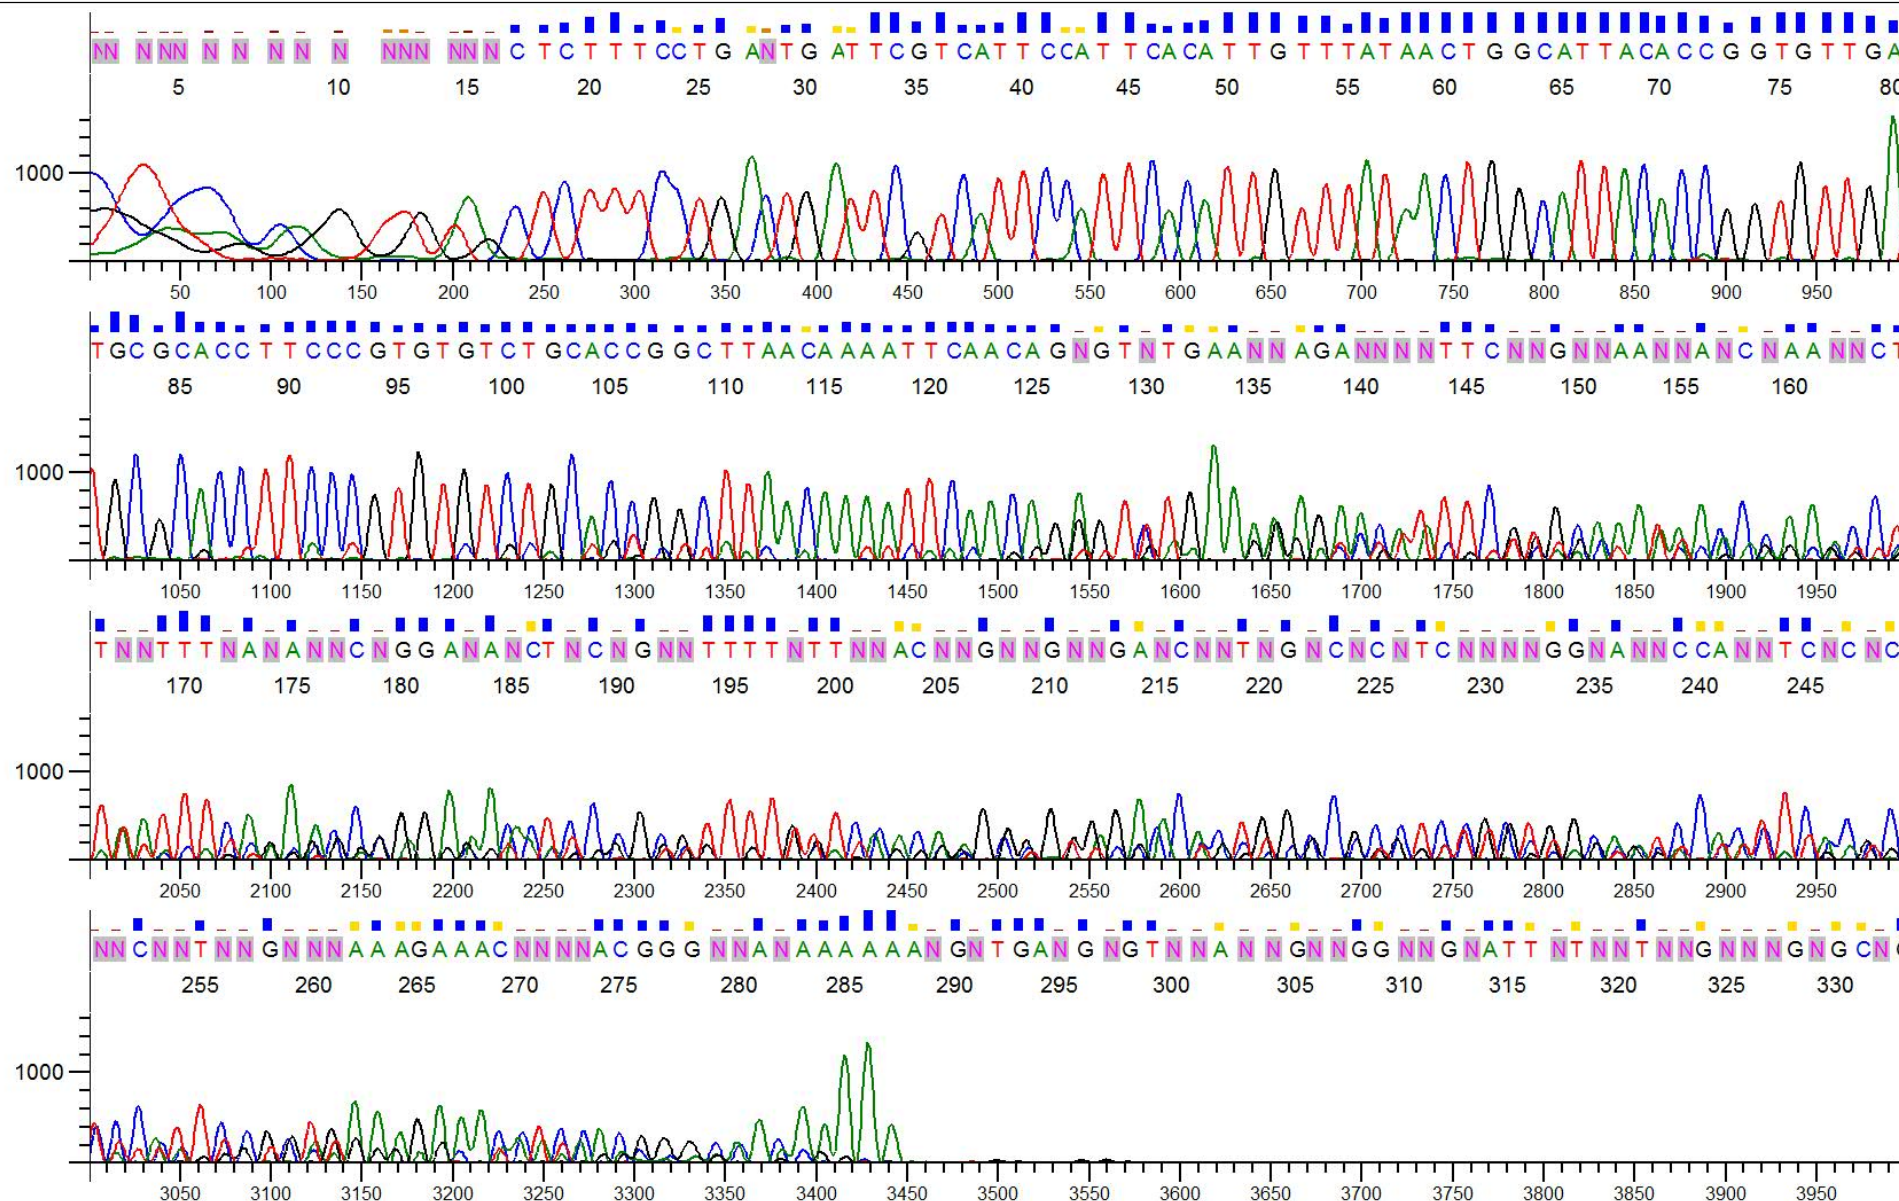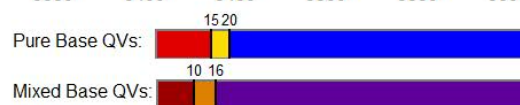

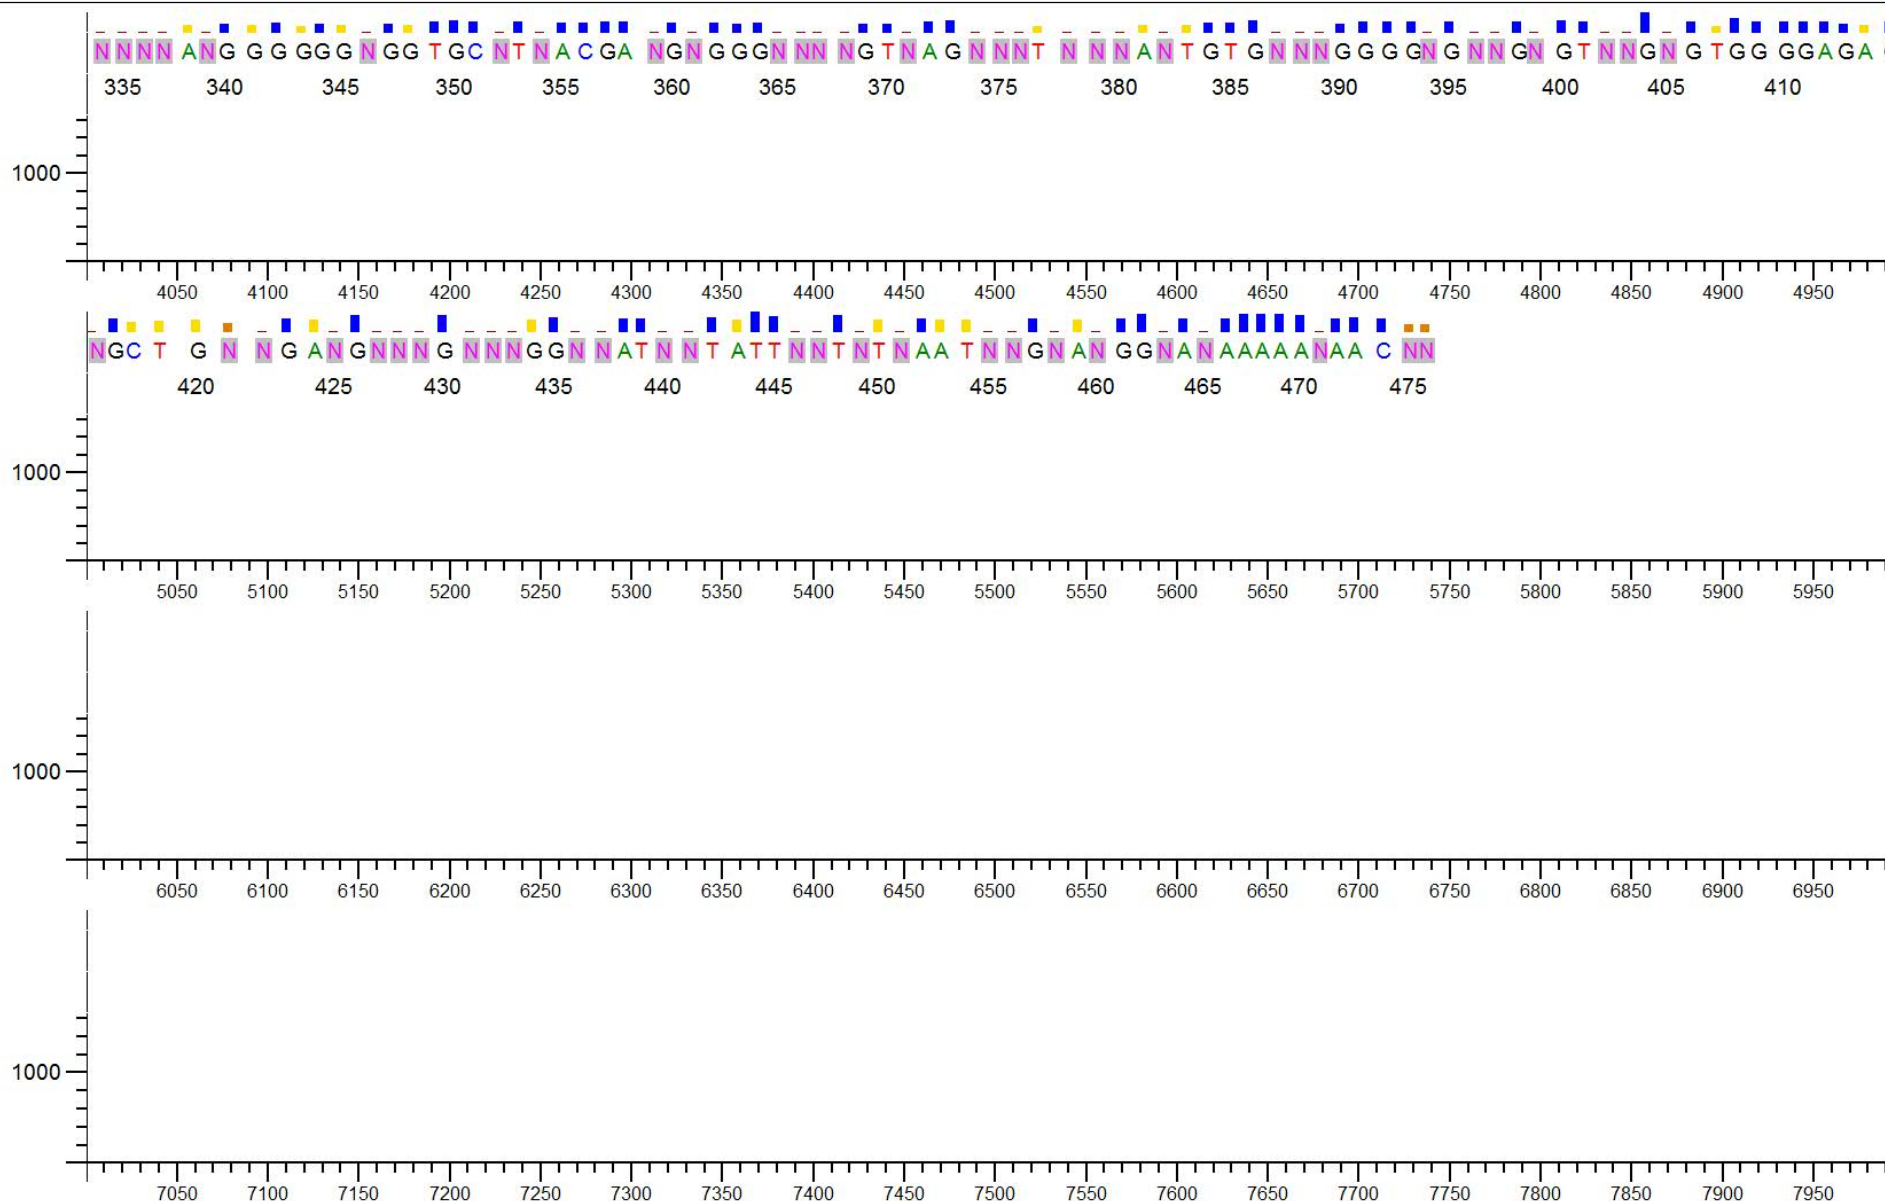

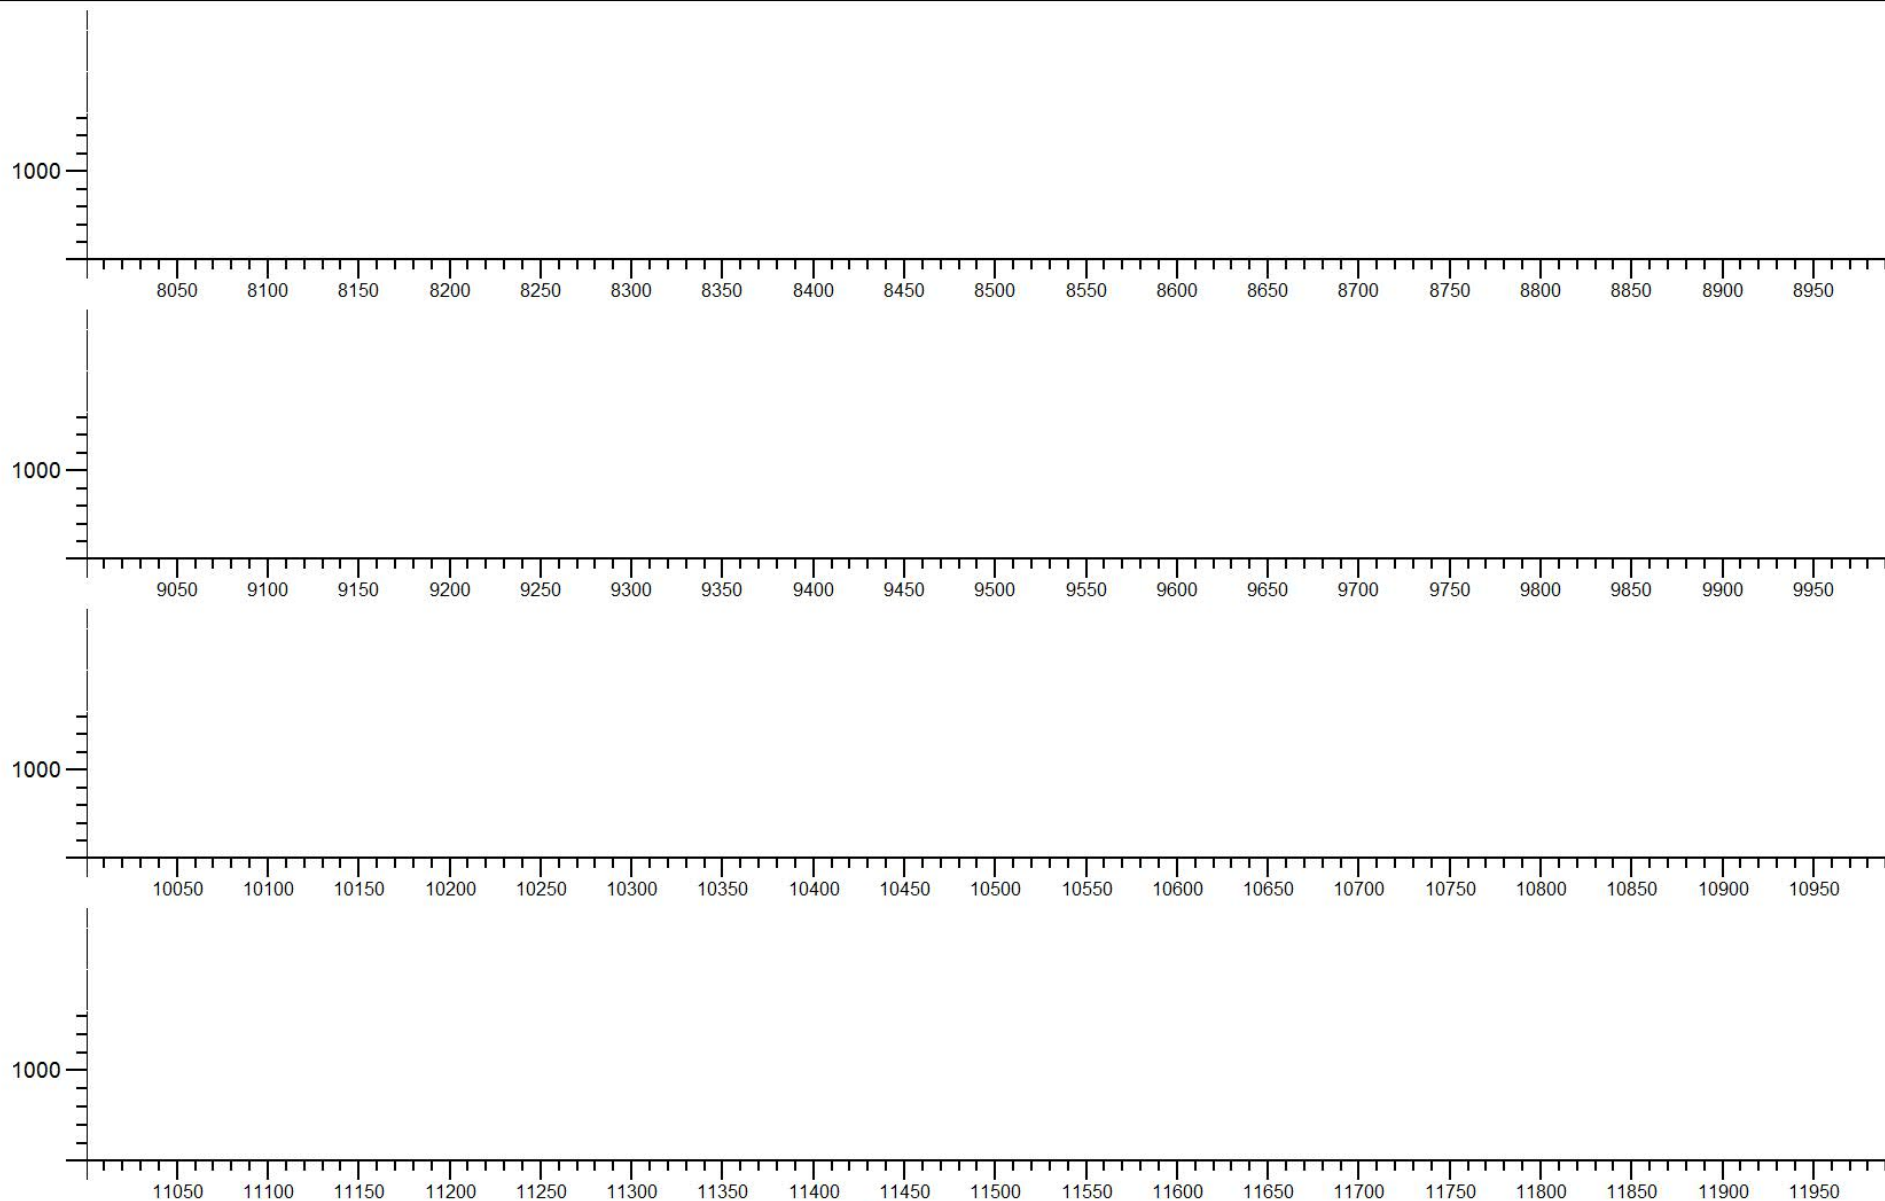



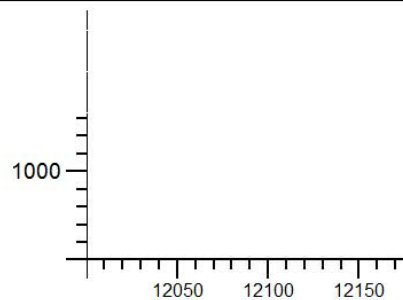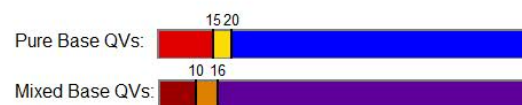

Supplement: raw_material.zip [file raw_material.zip]

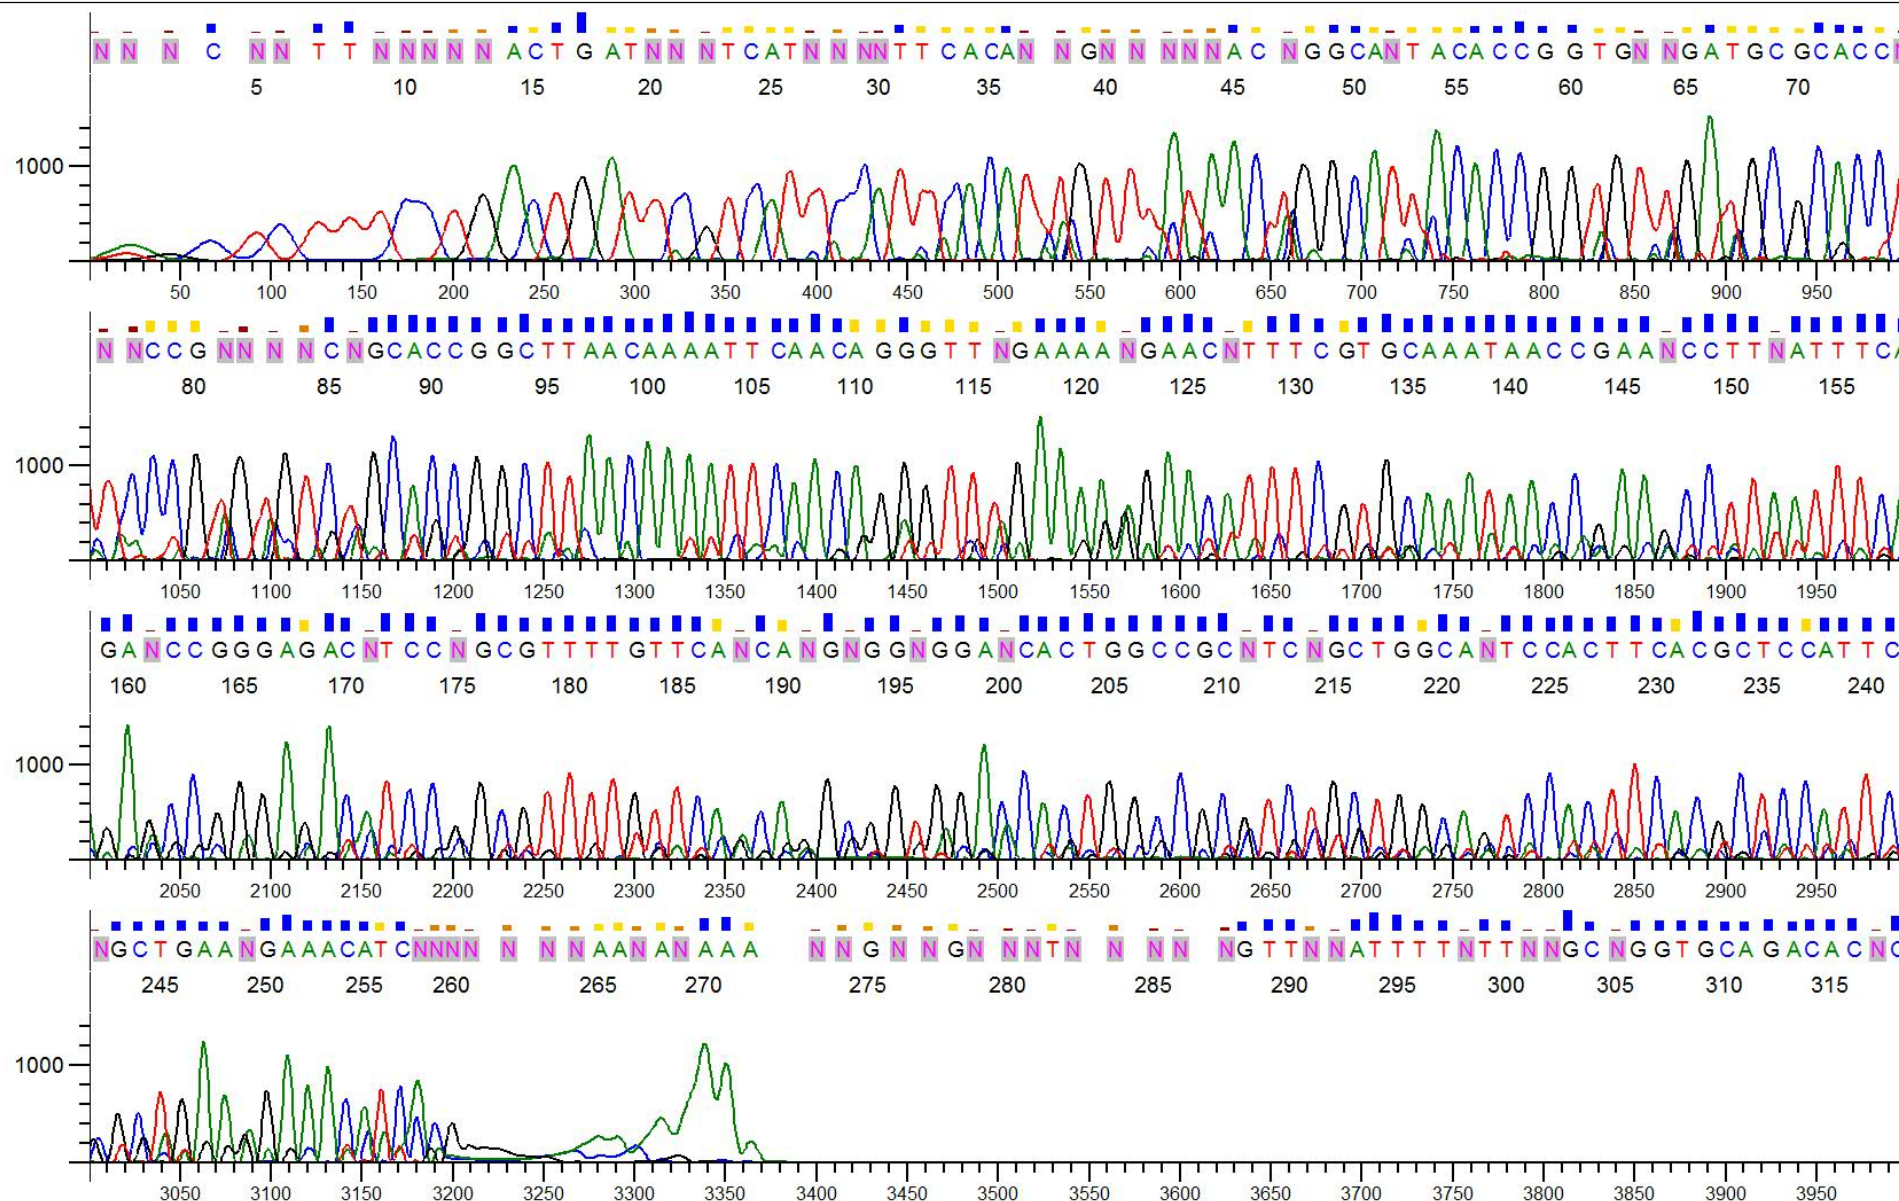

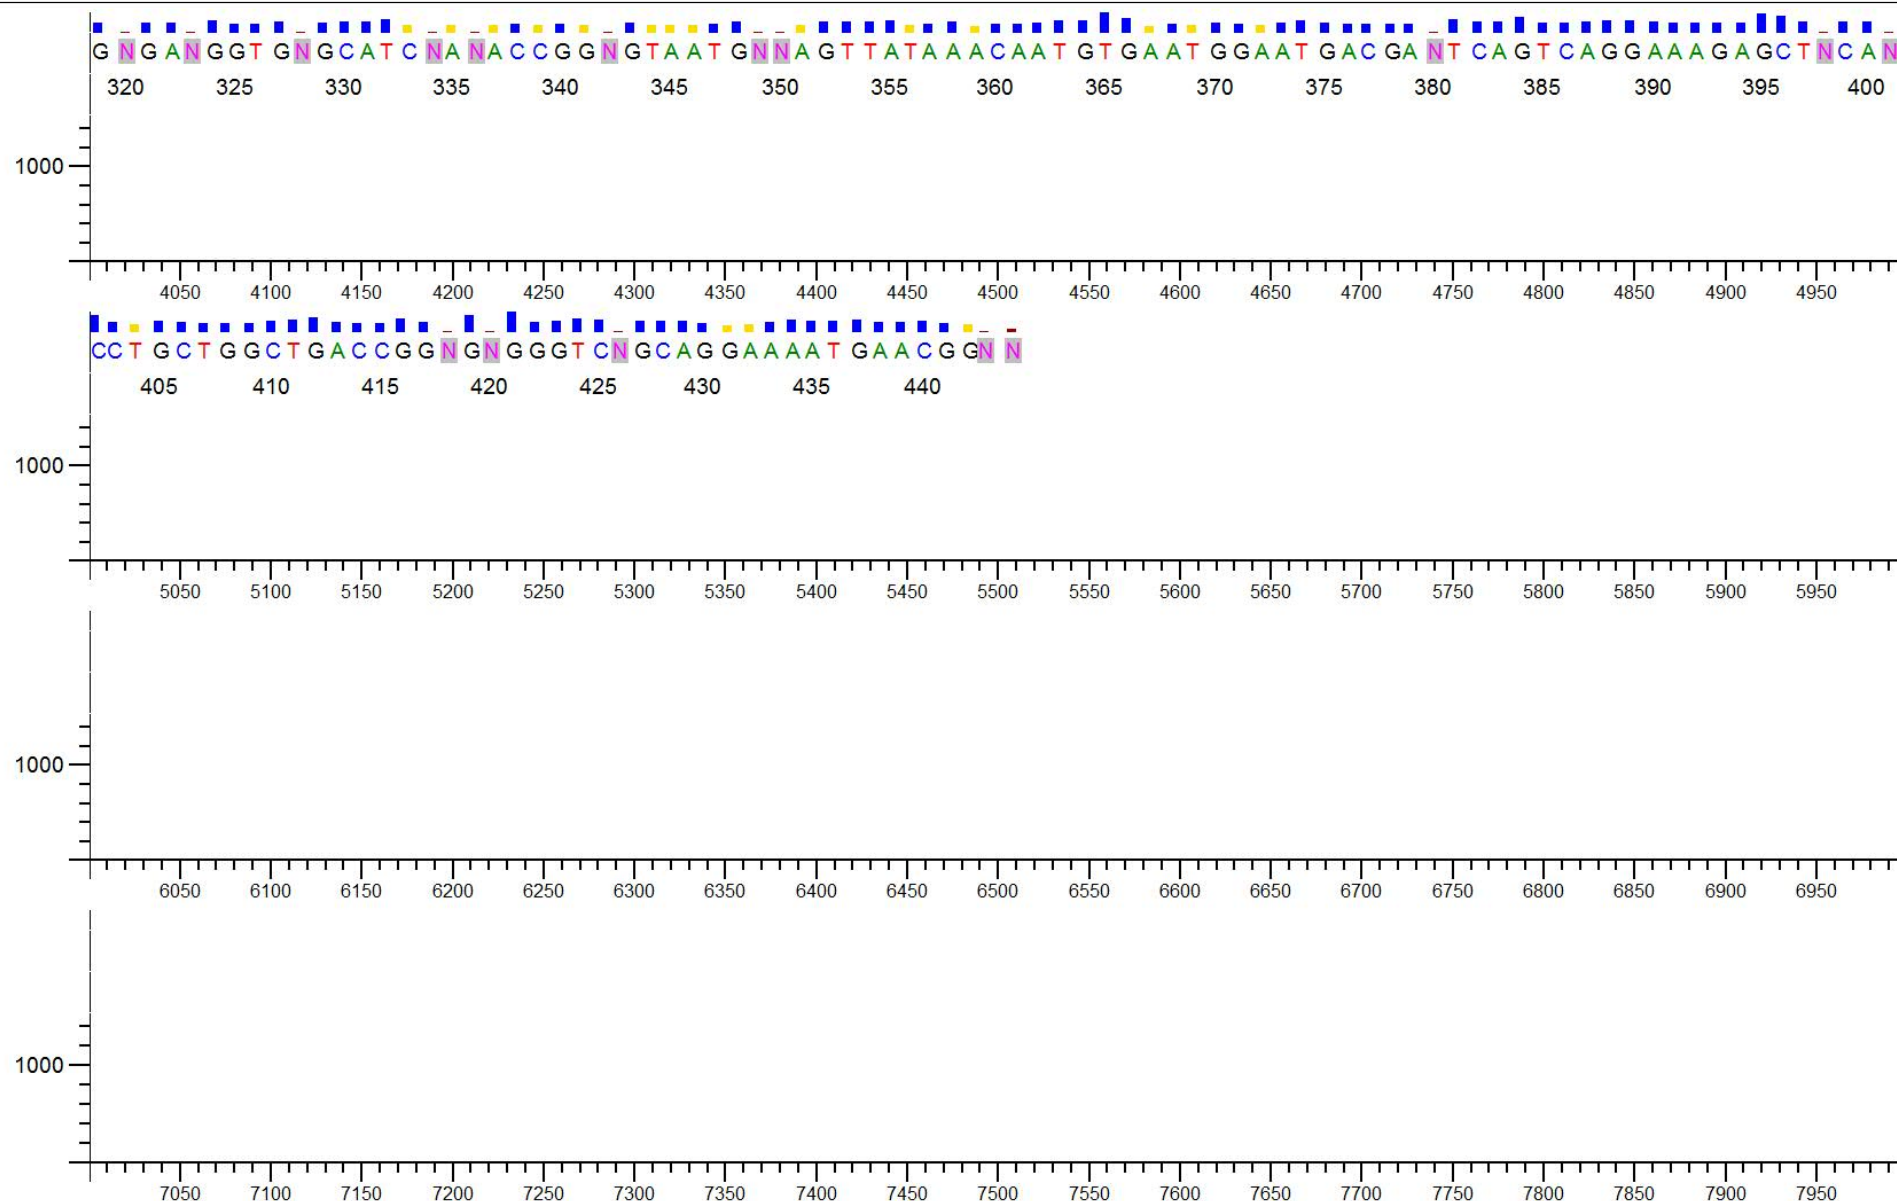

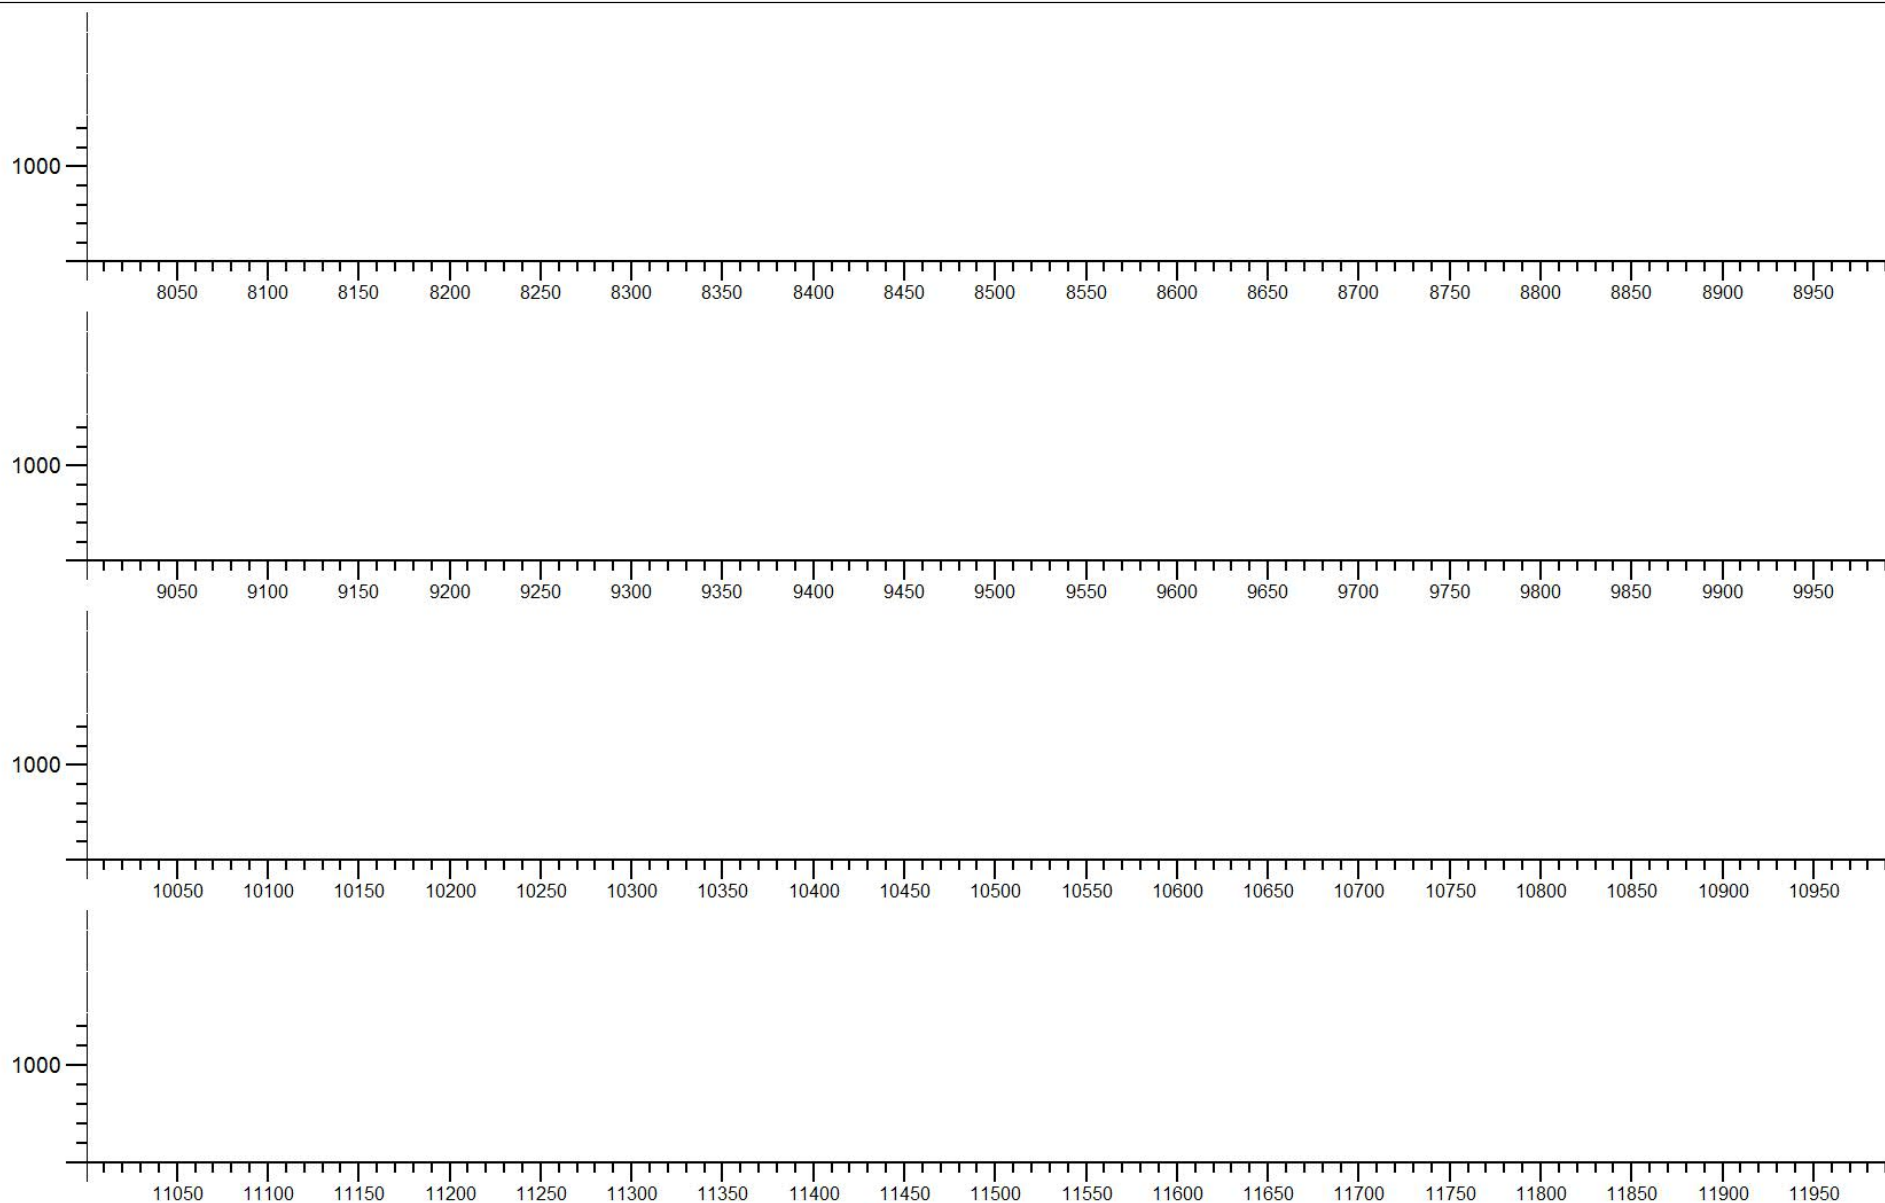



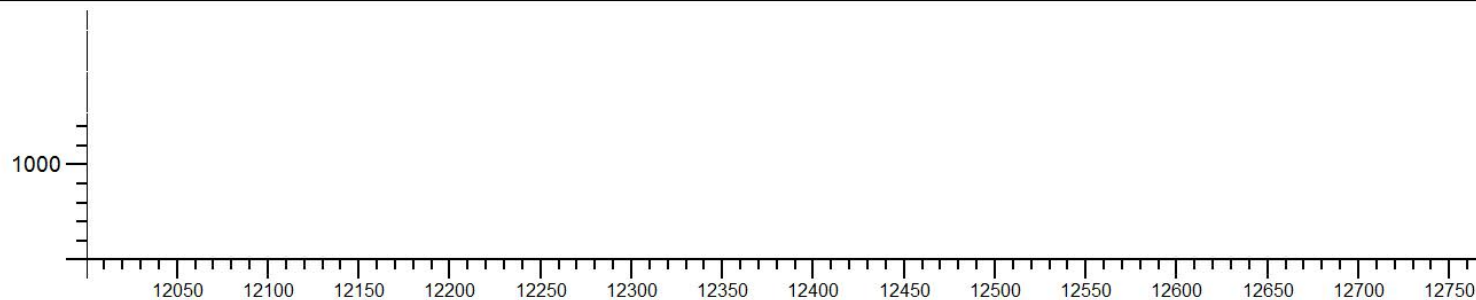

Supplement: raw_material.zip [file raw_material.zip]

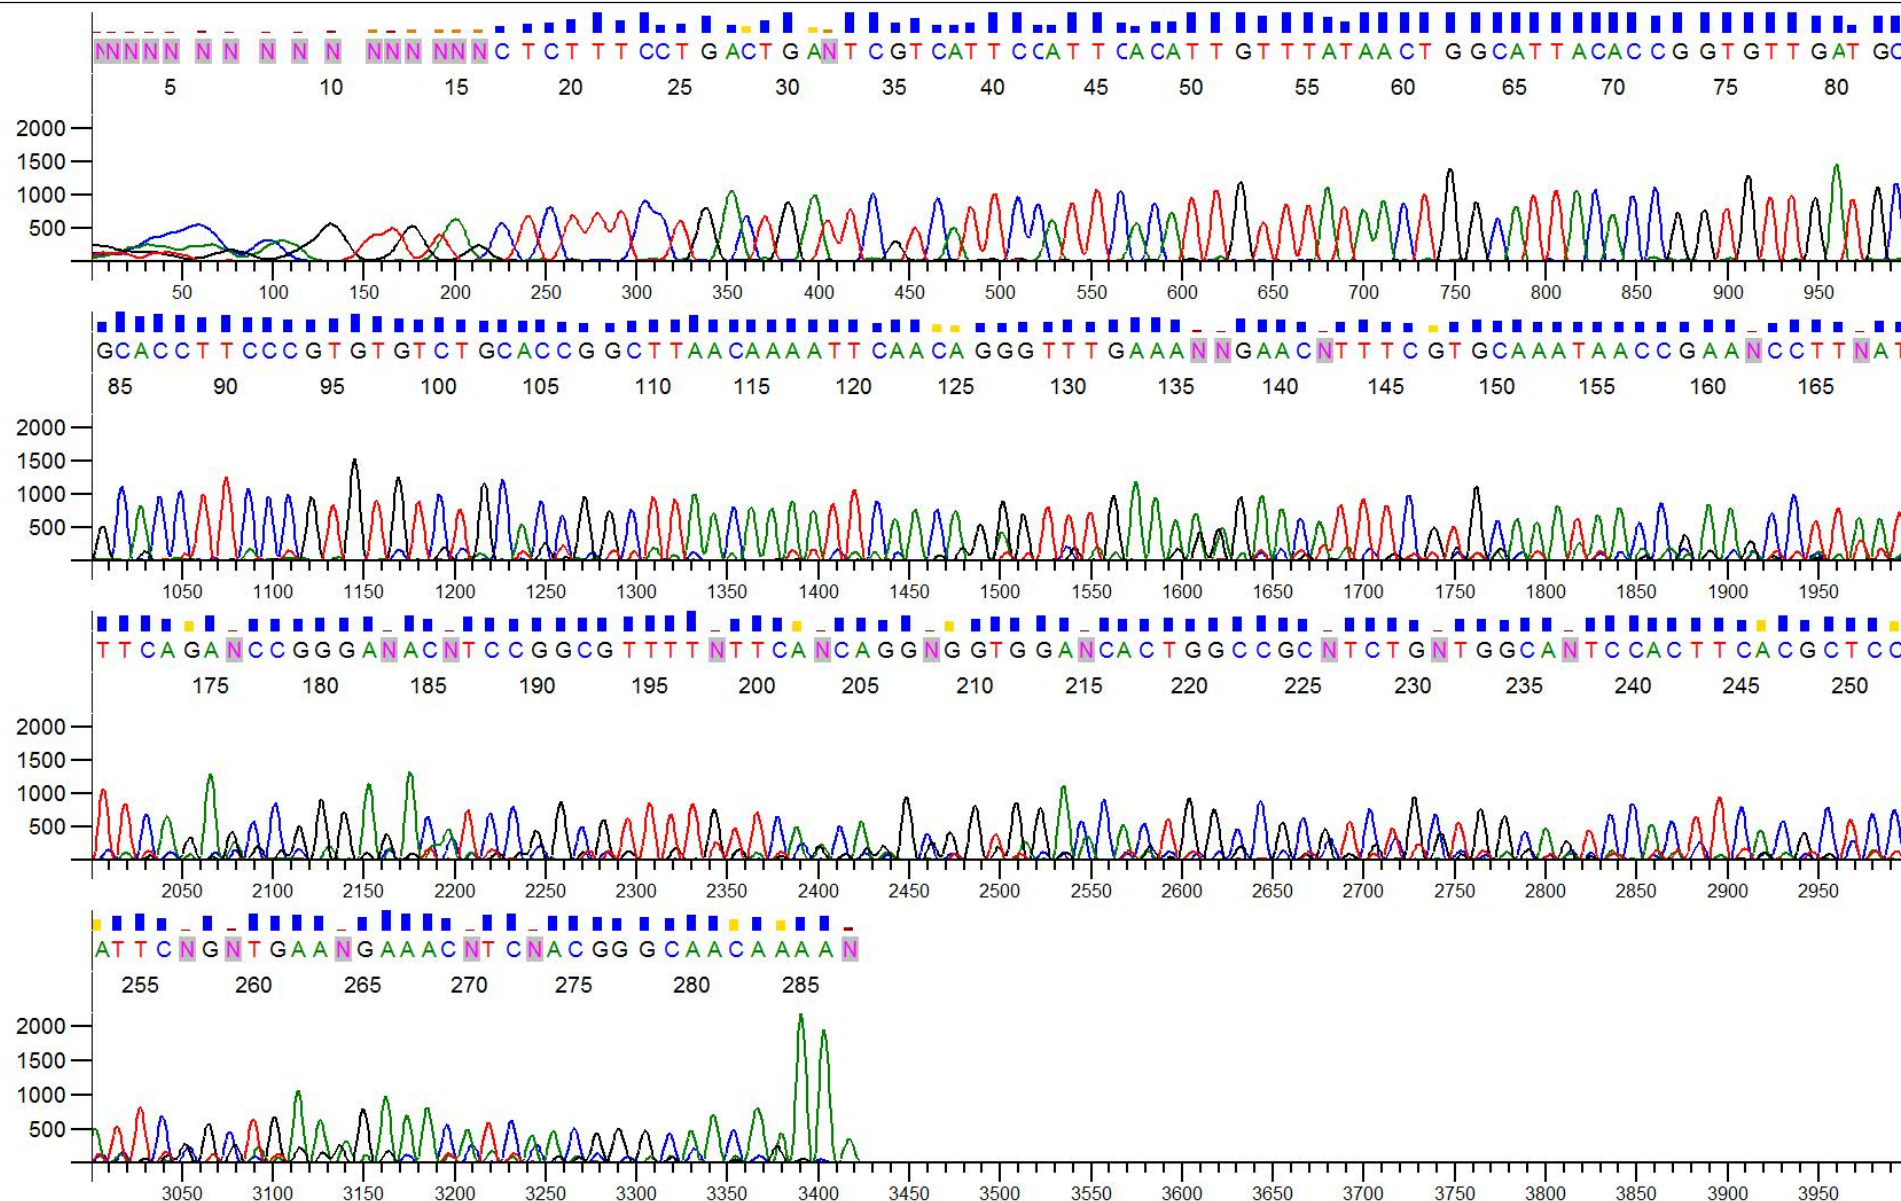

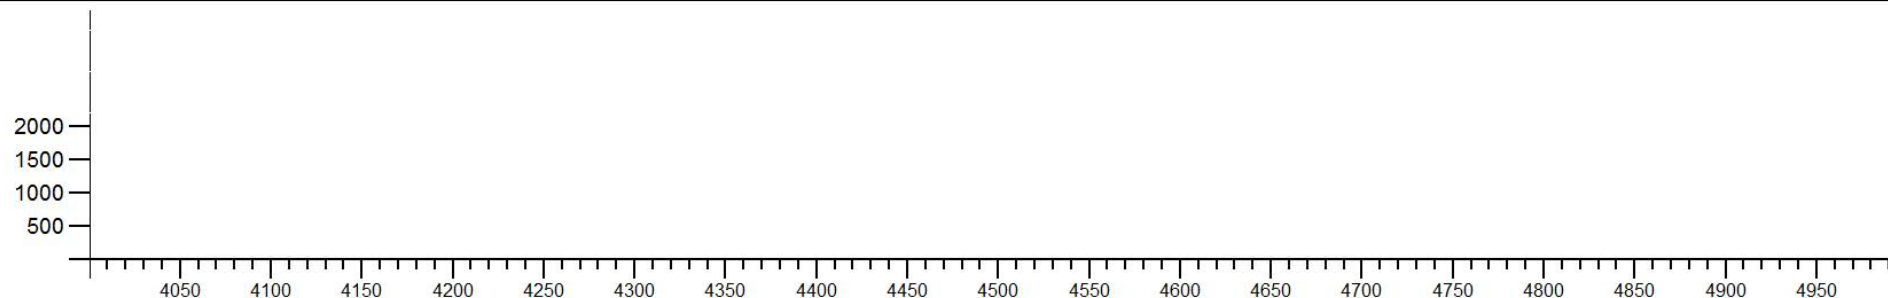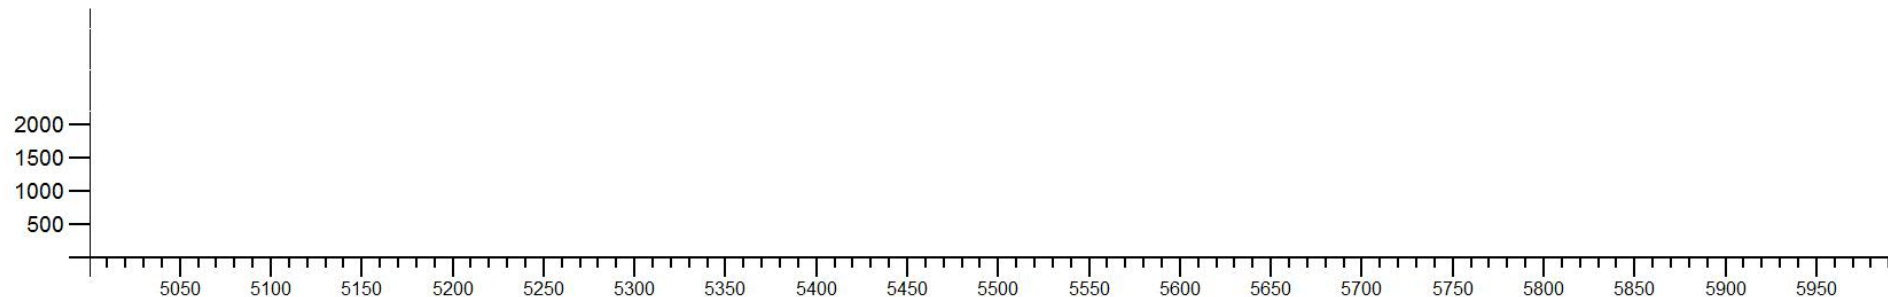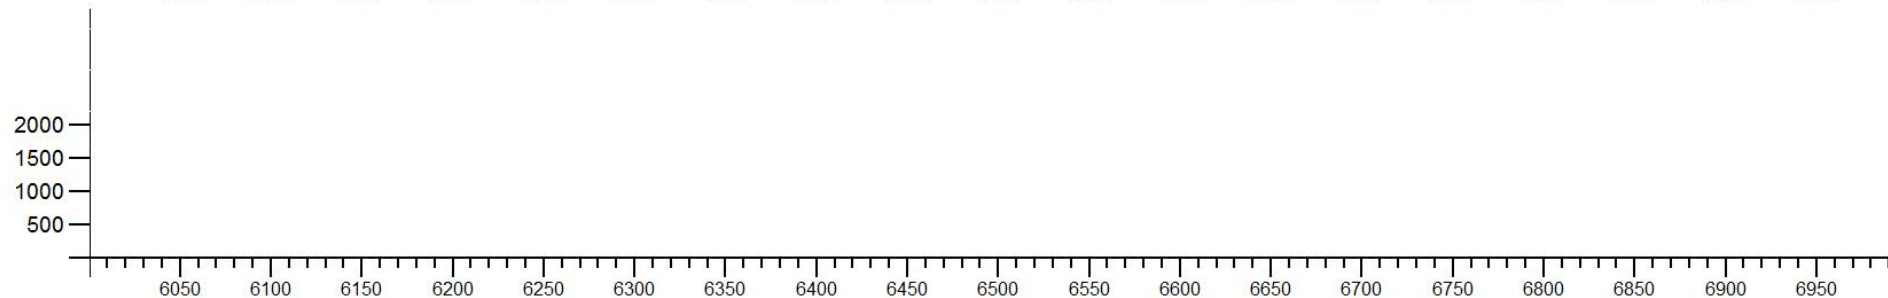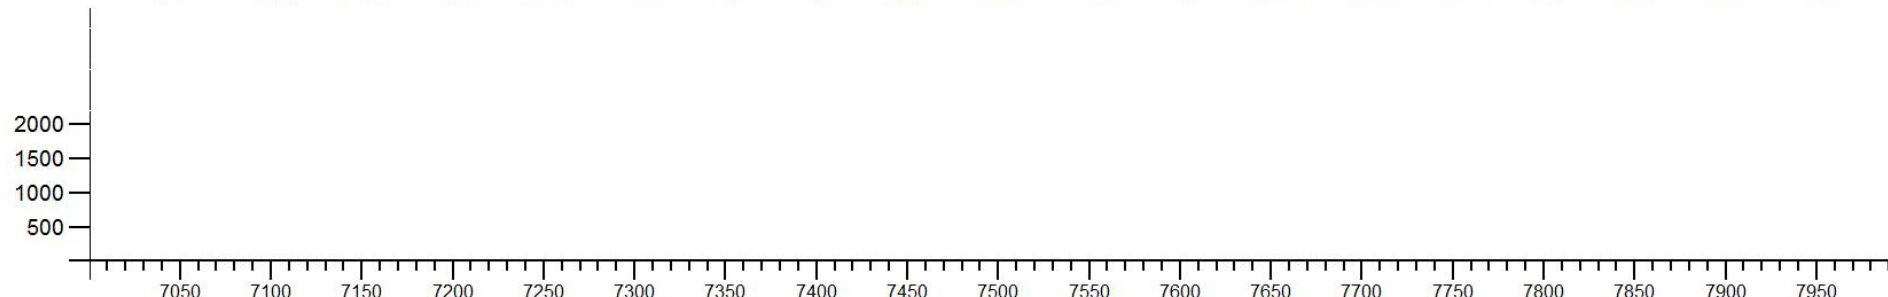

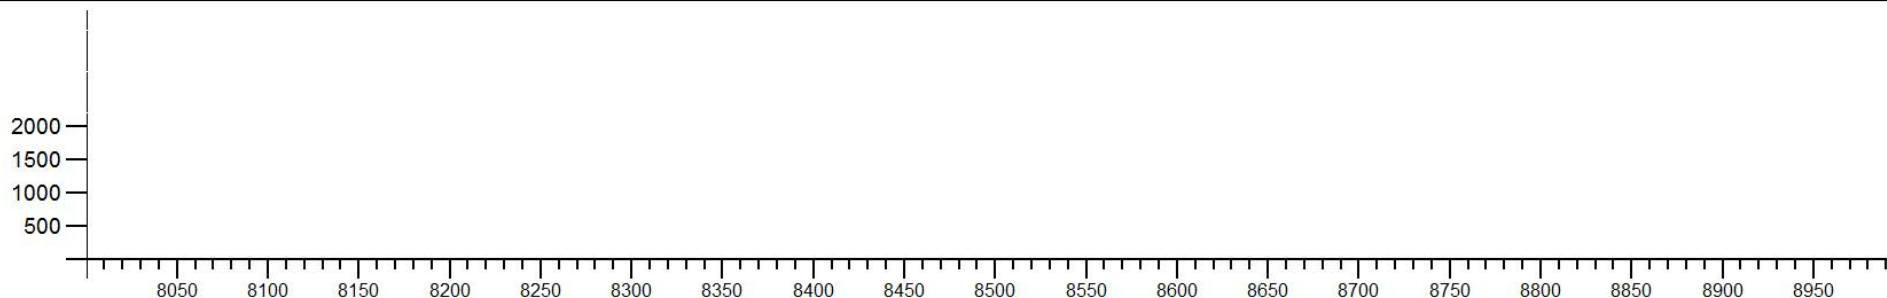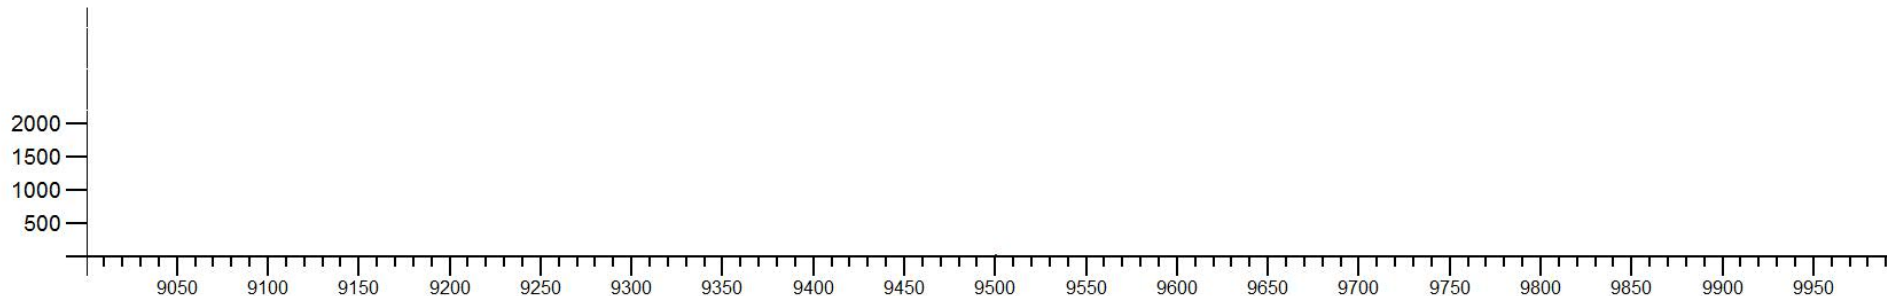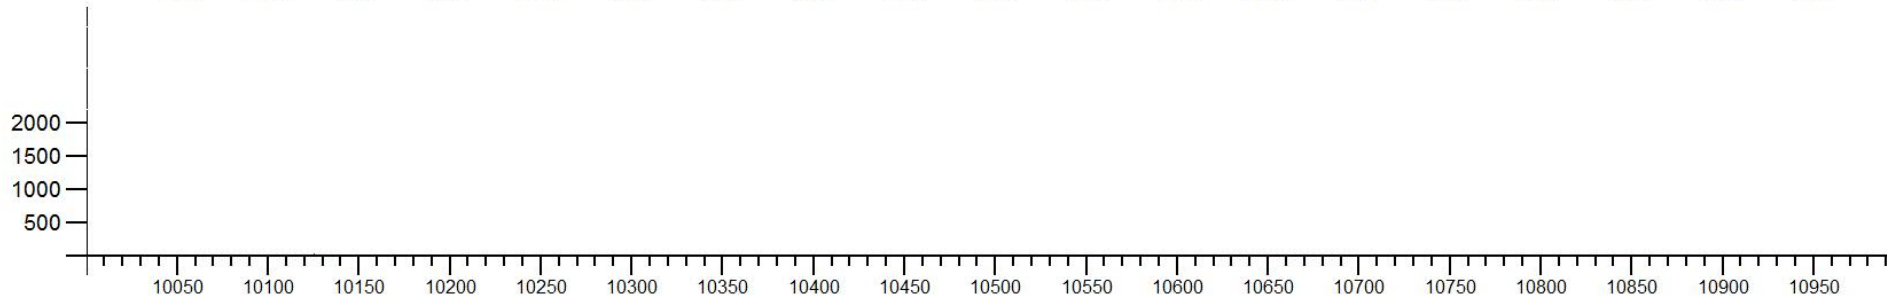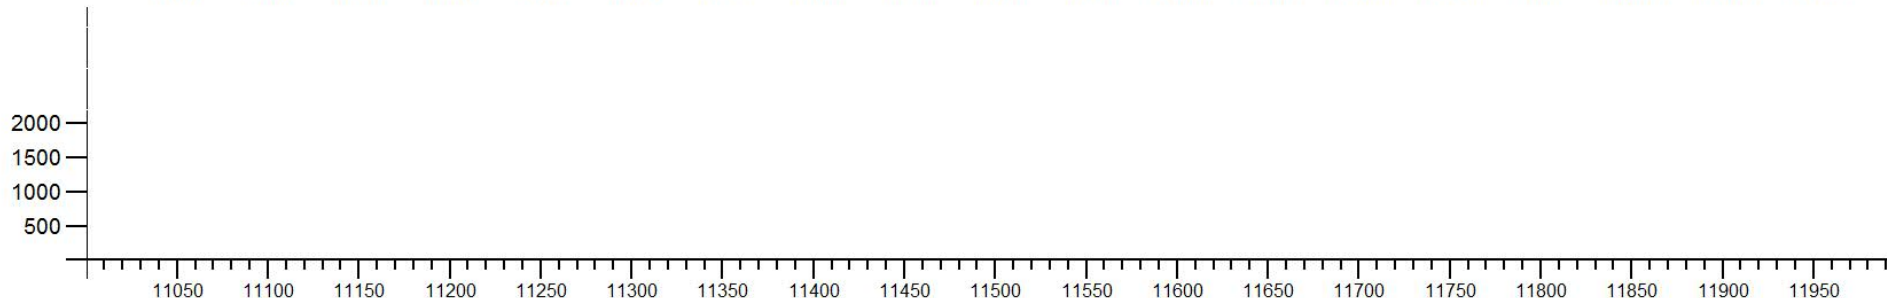

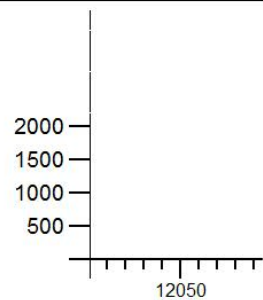

Supplement: raw_material.zip [file raw_material.zip]

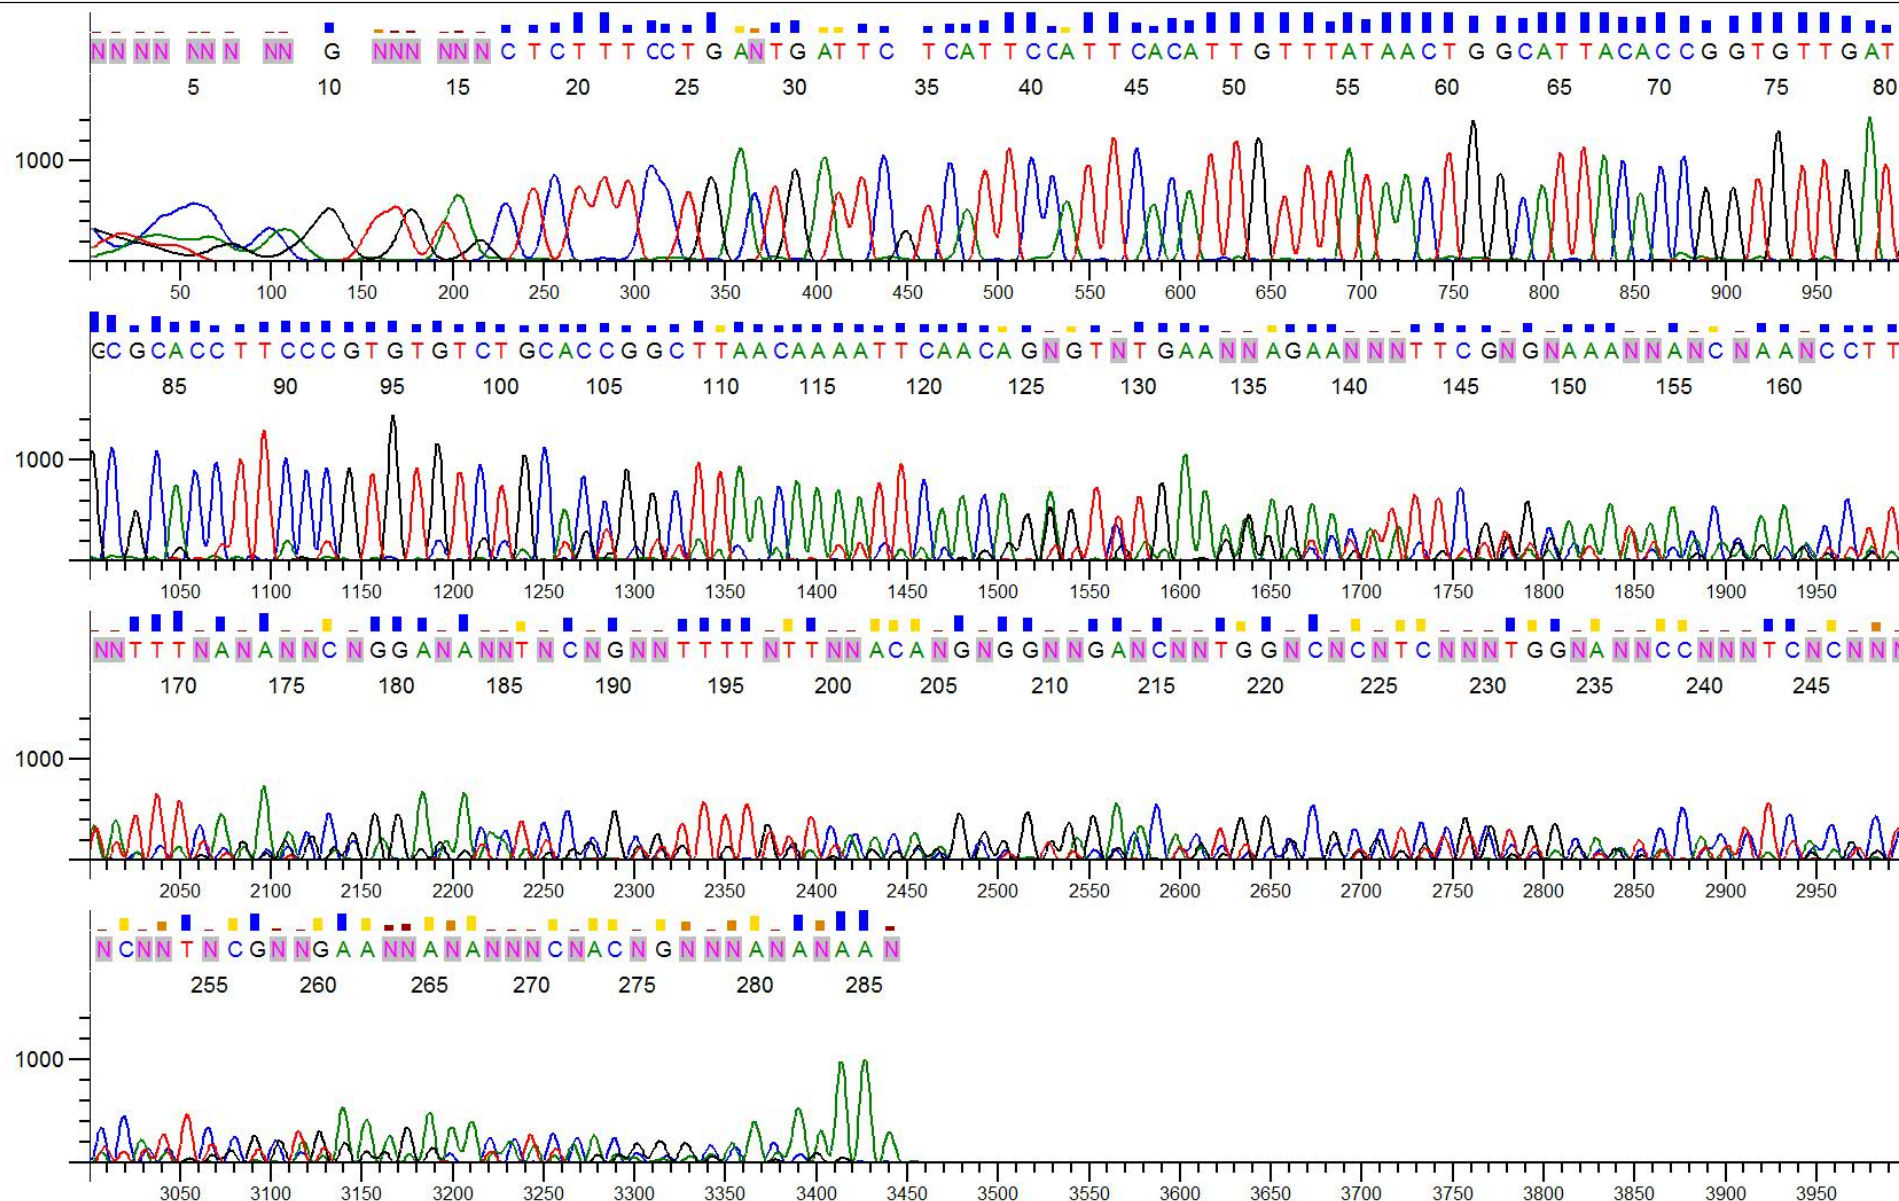

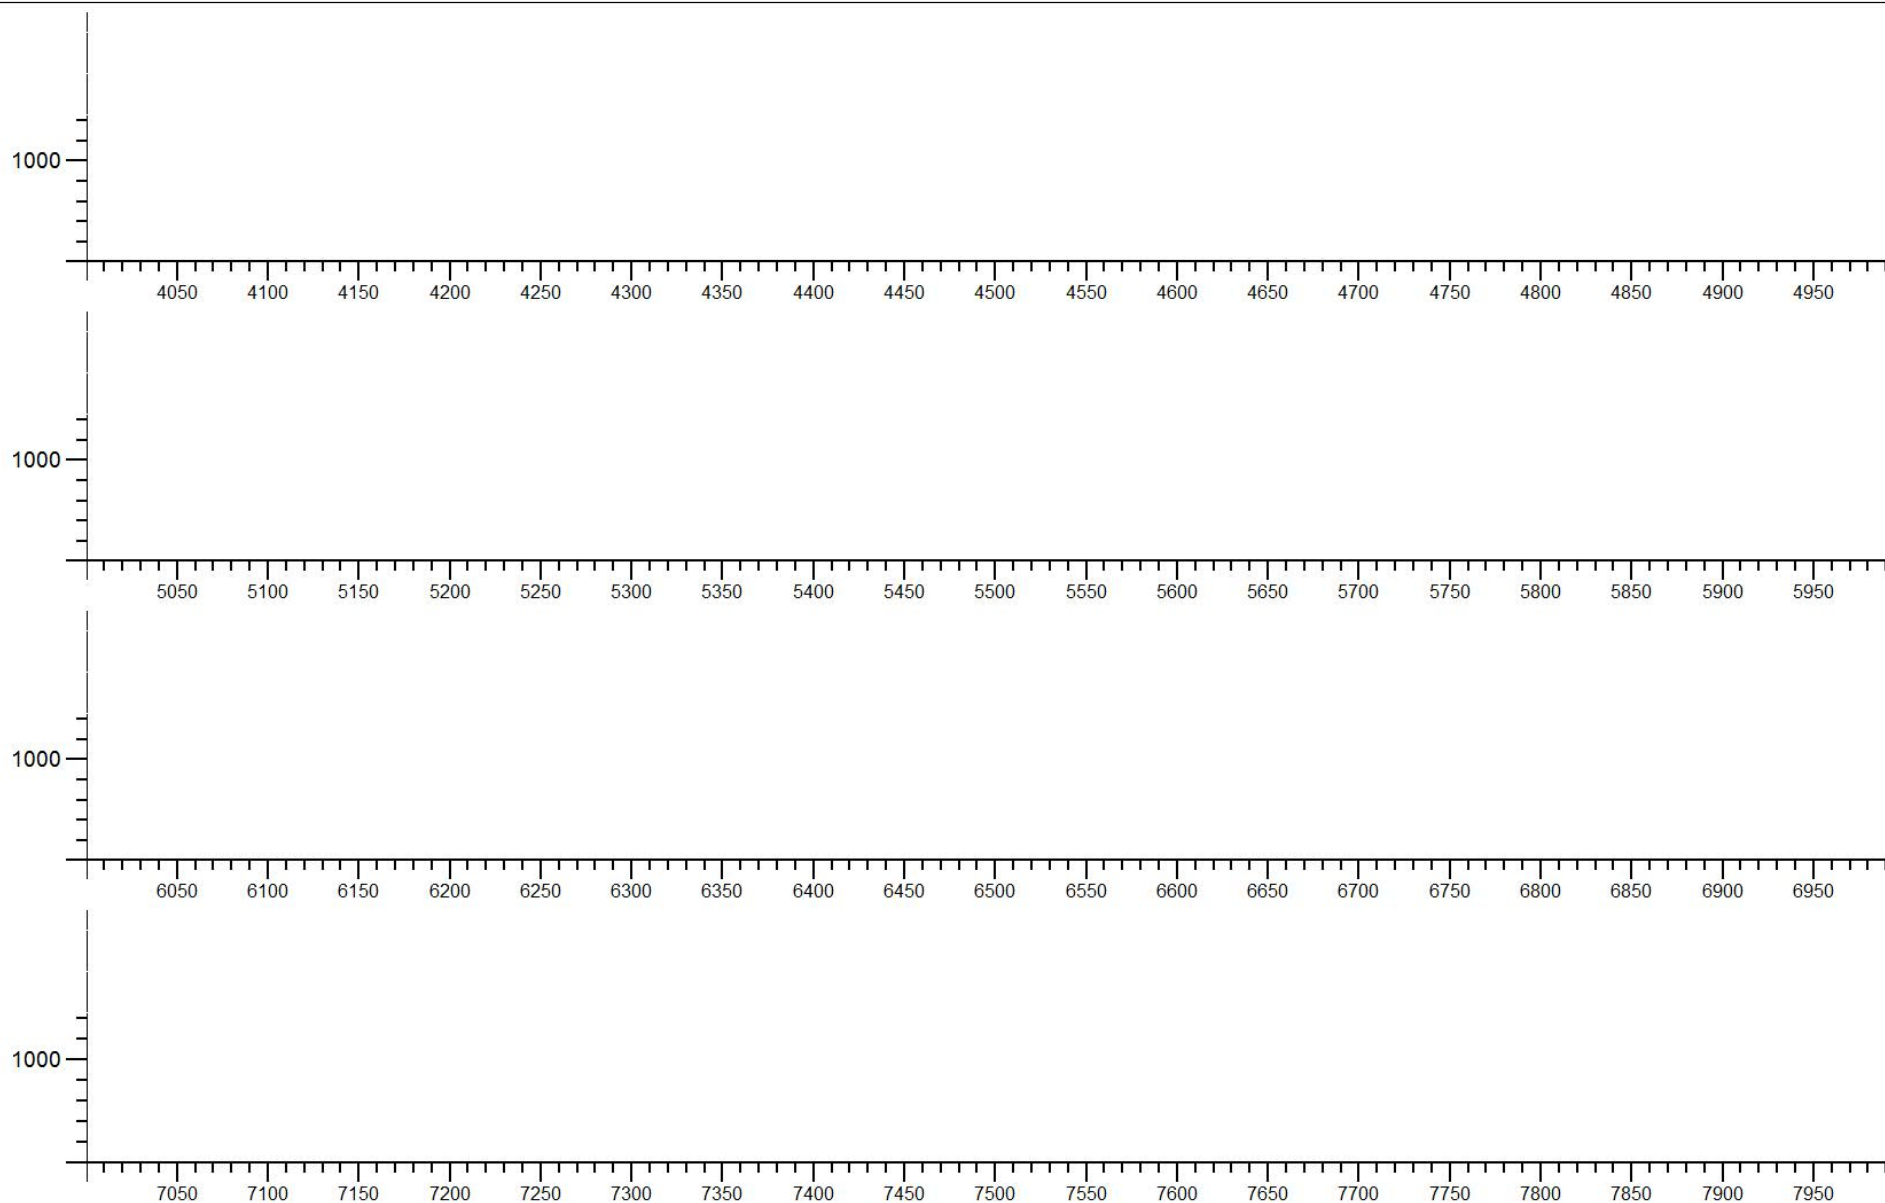

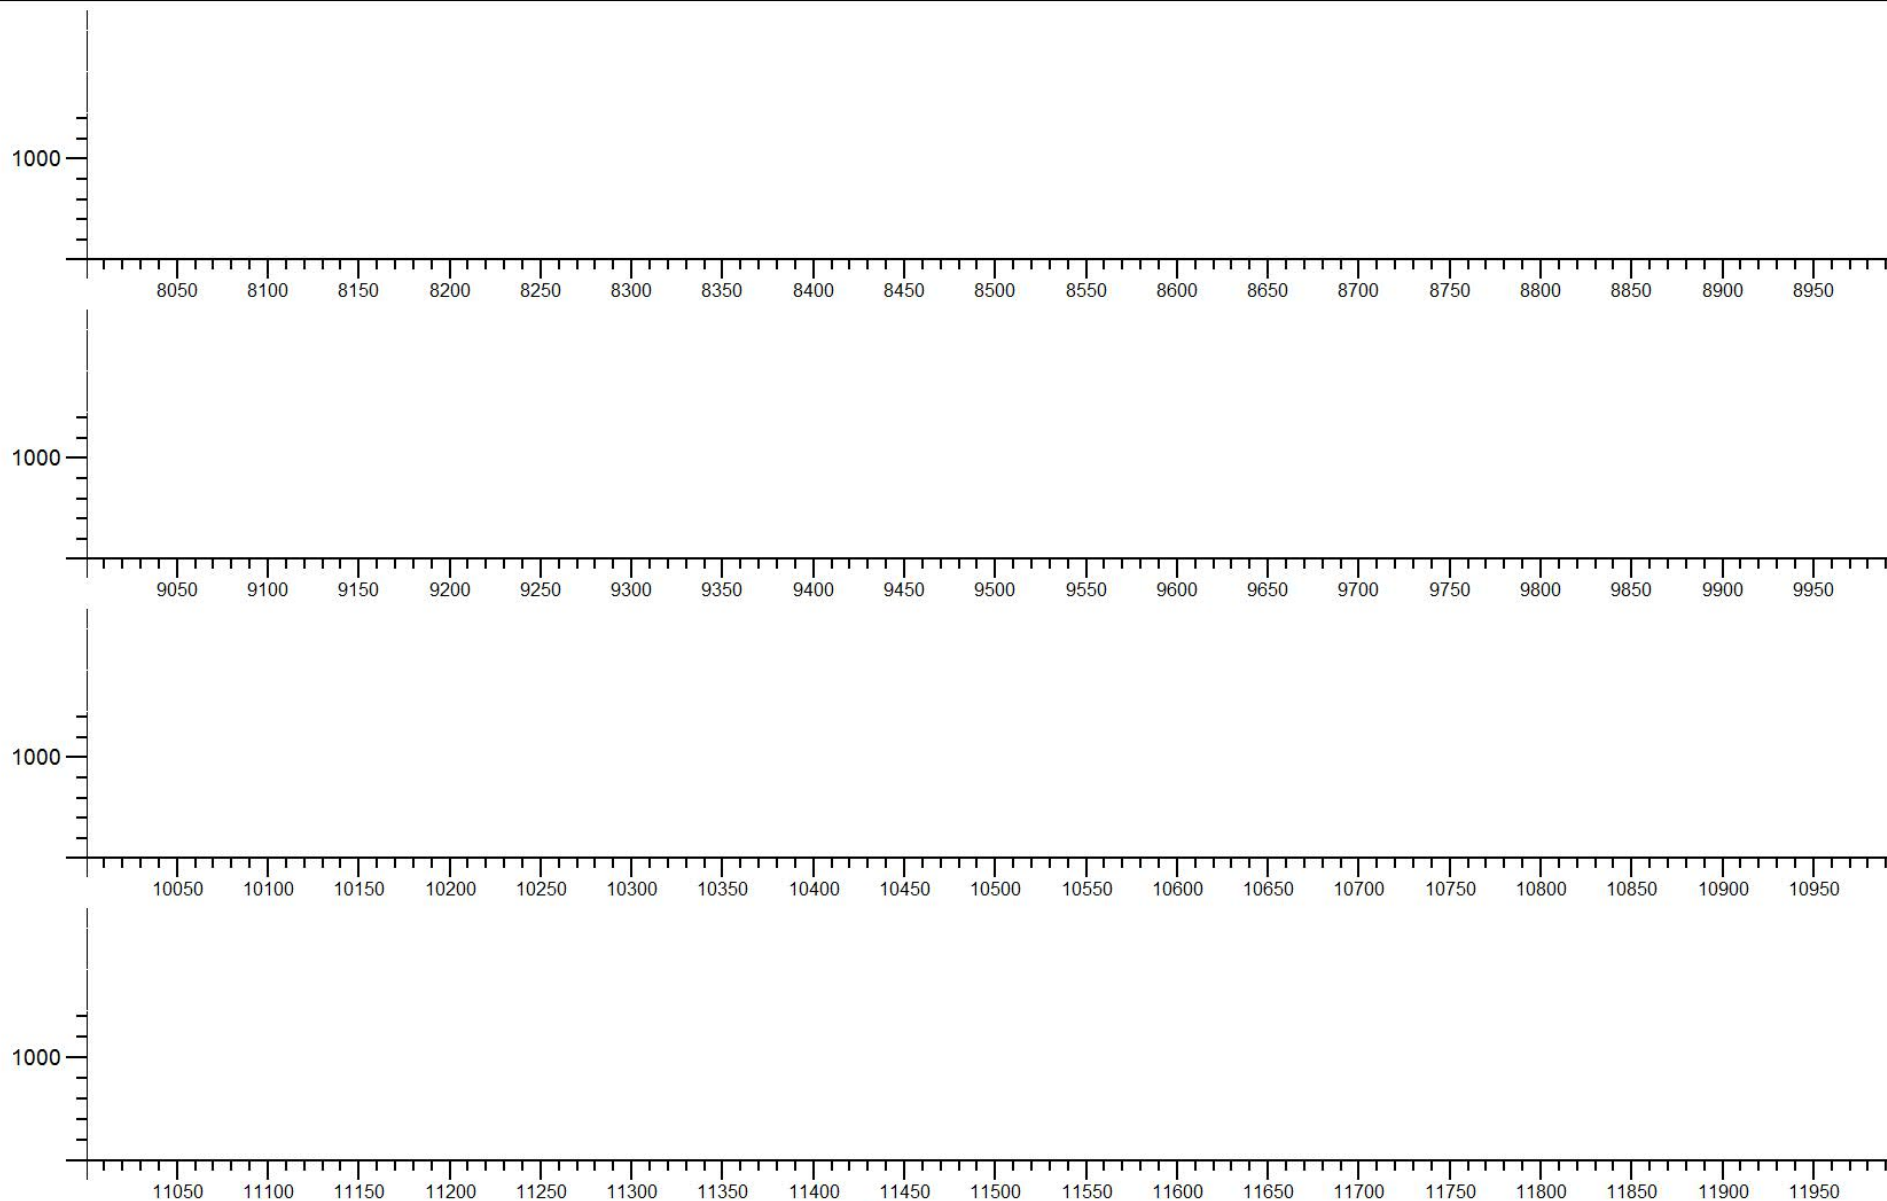

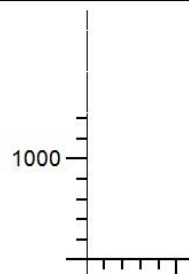

Supplement: raw_material.zip [file raw_material.zip]

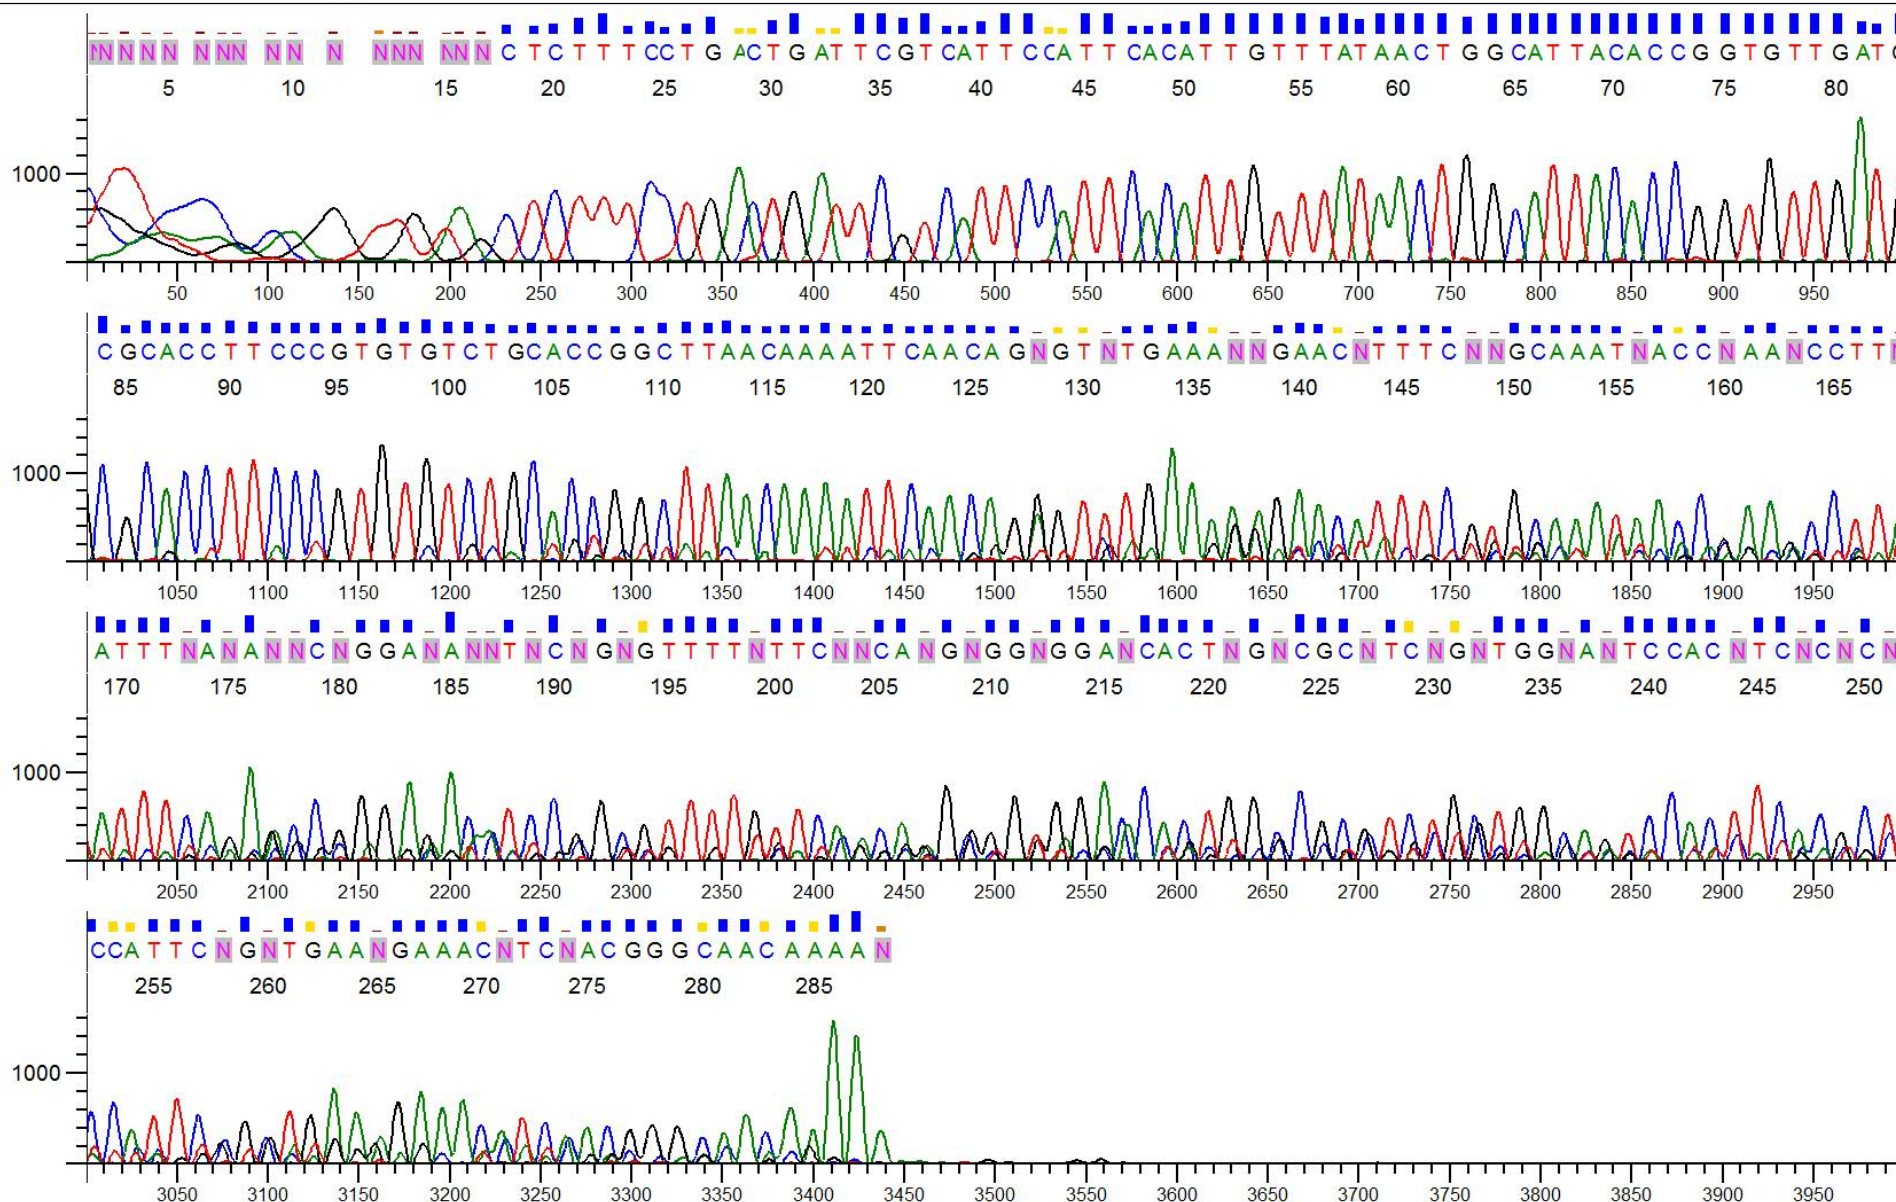

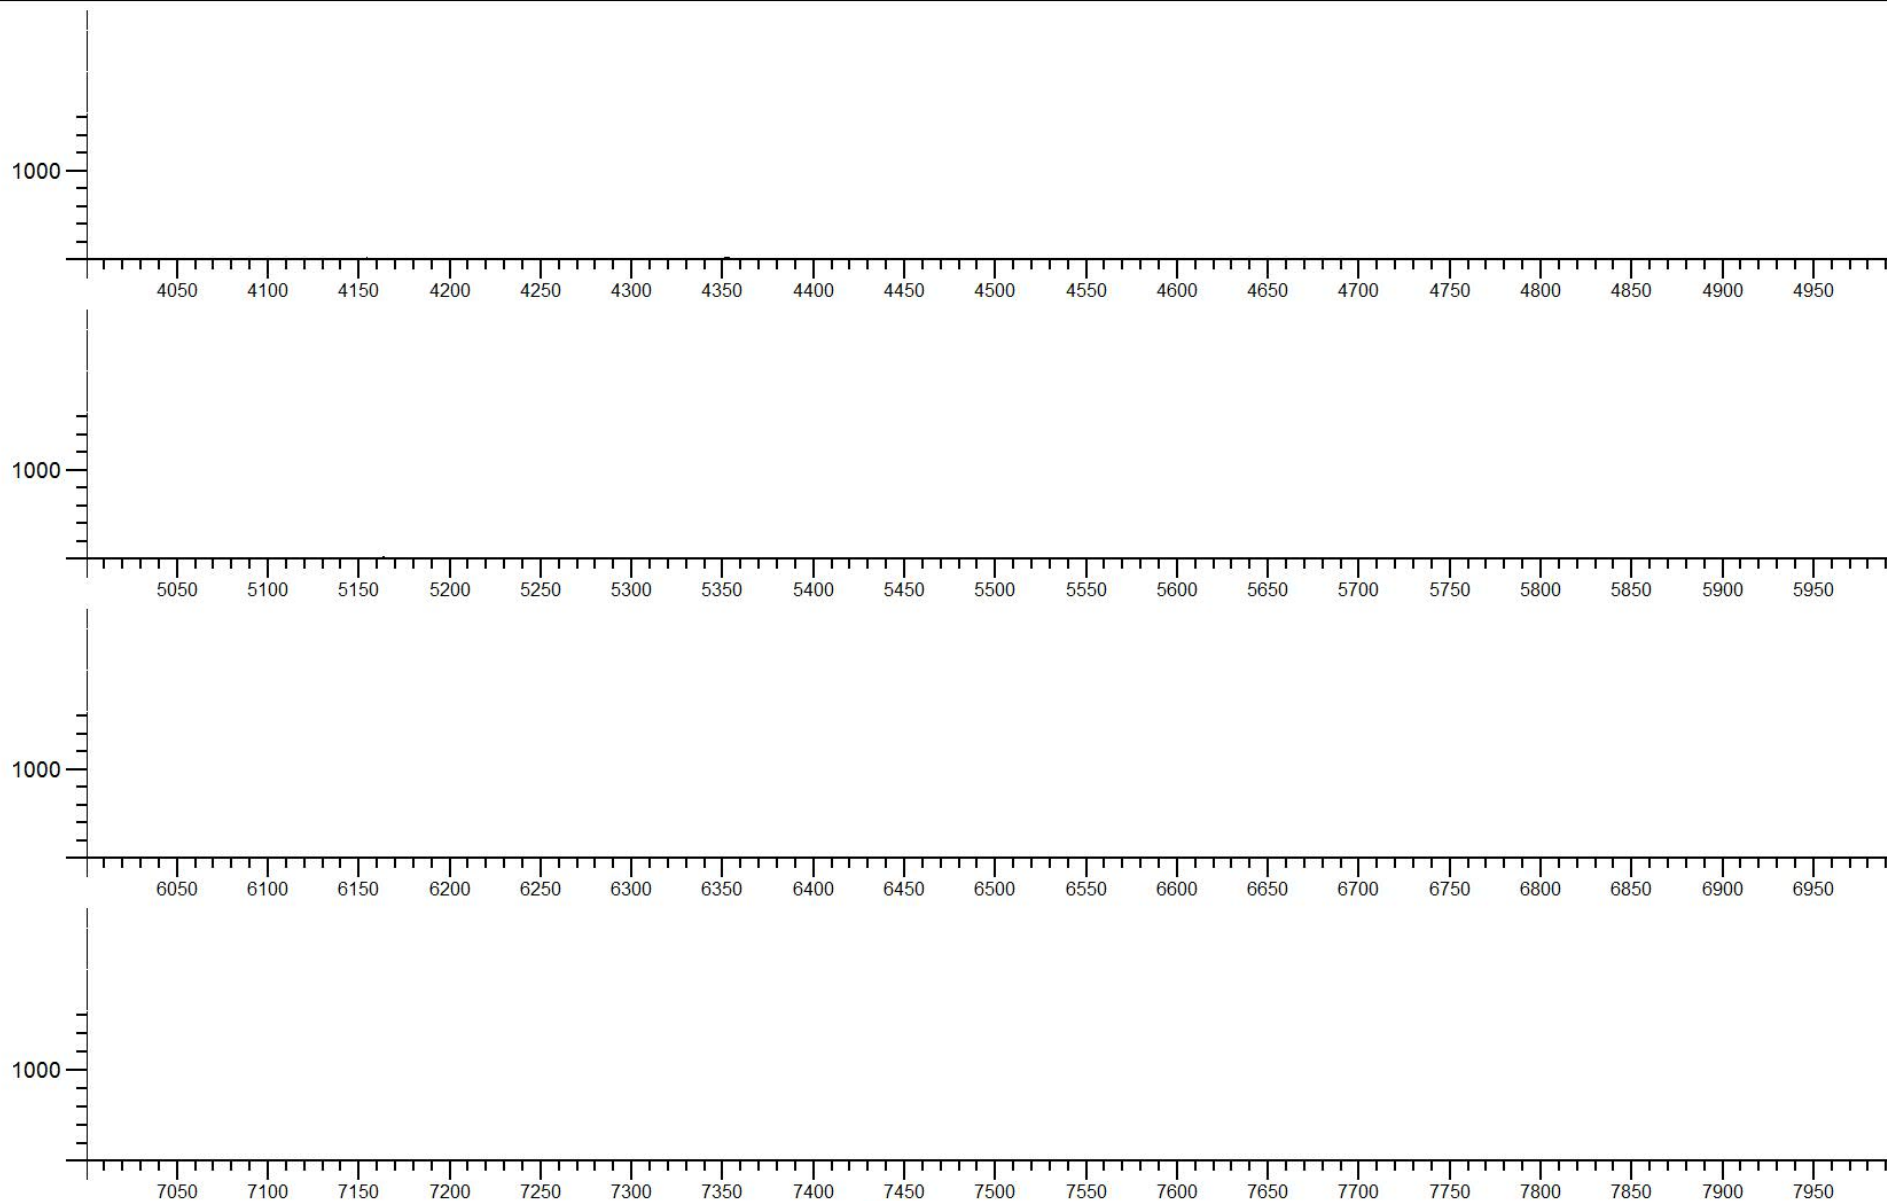

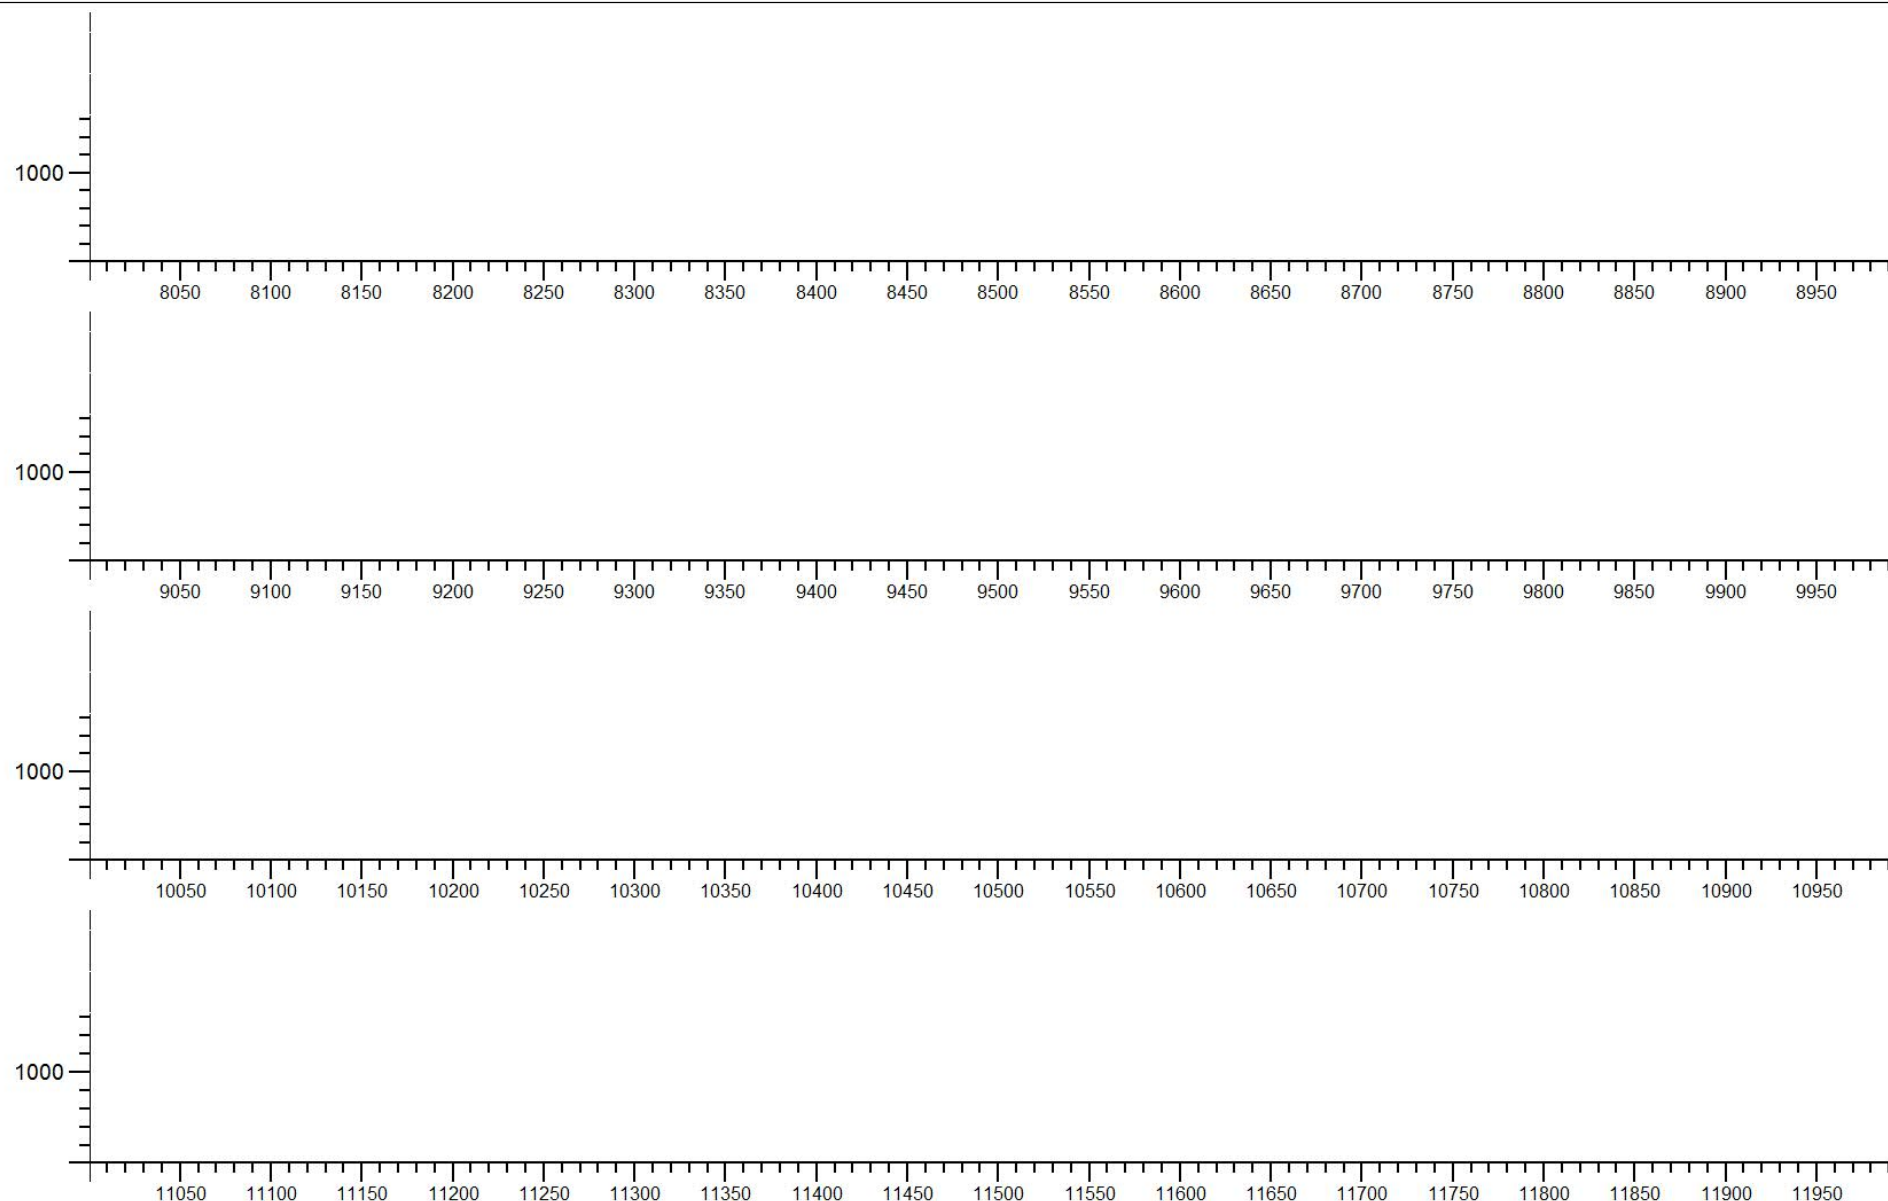

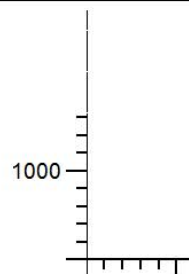

Supplement: raw_material.zip [file raw_material.zip]

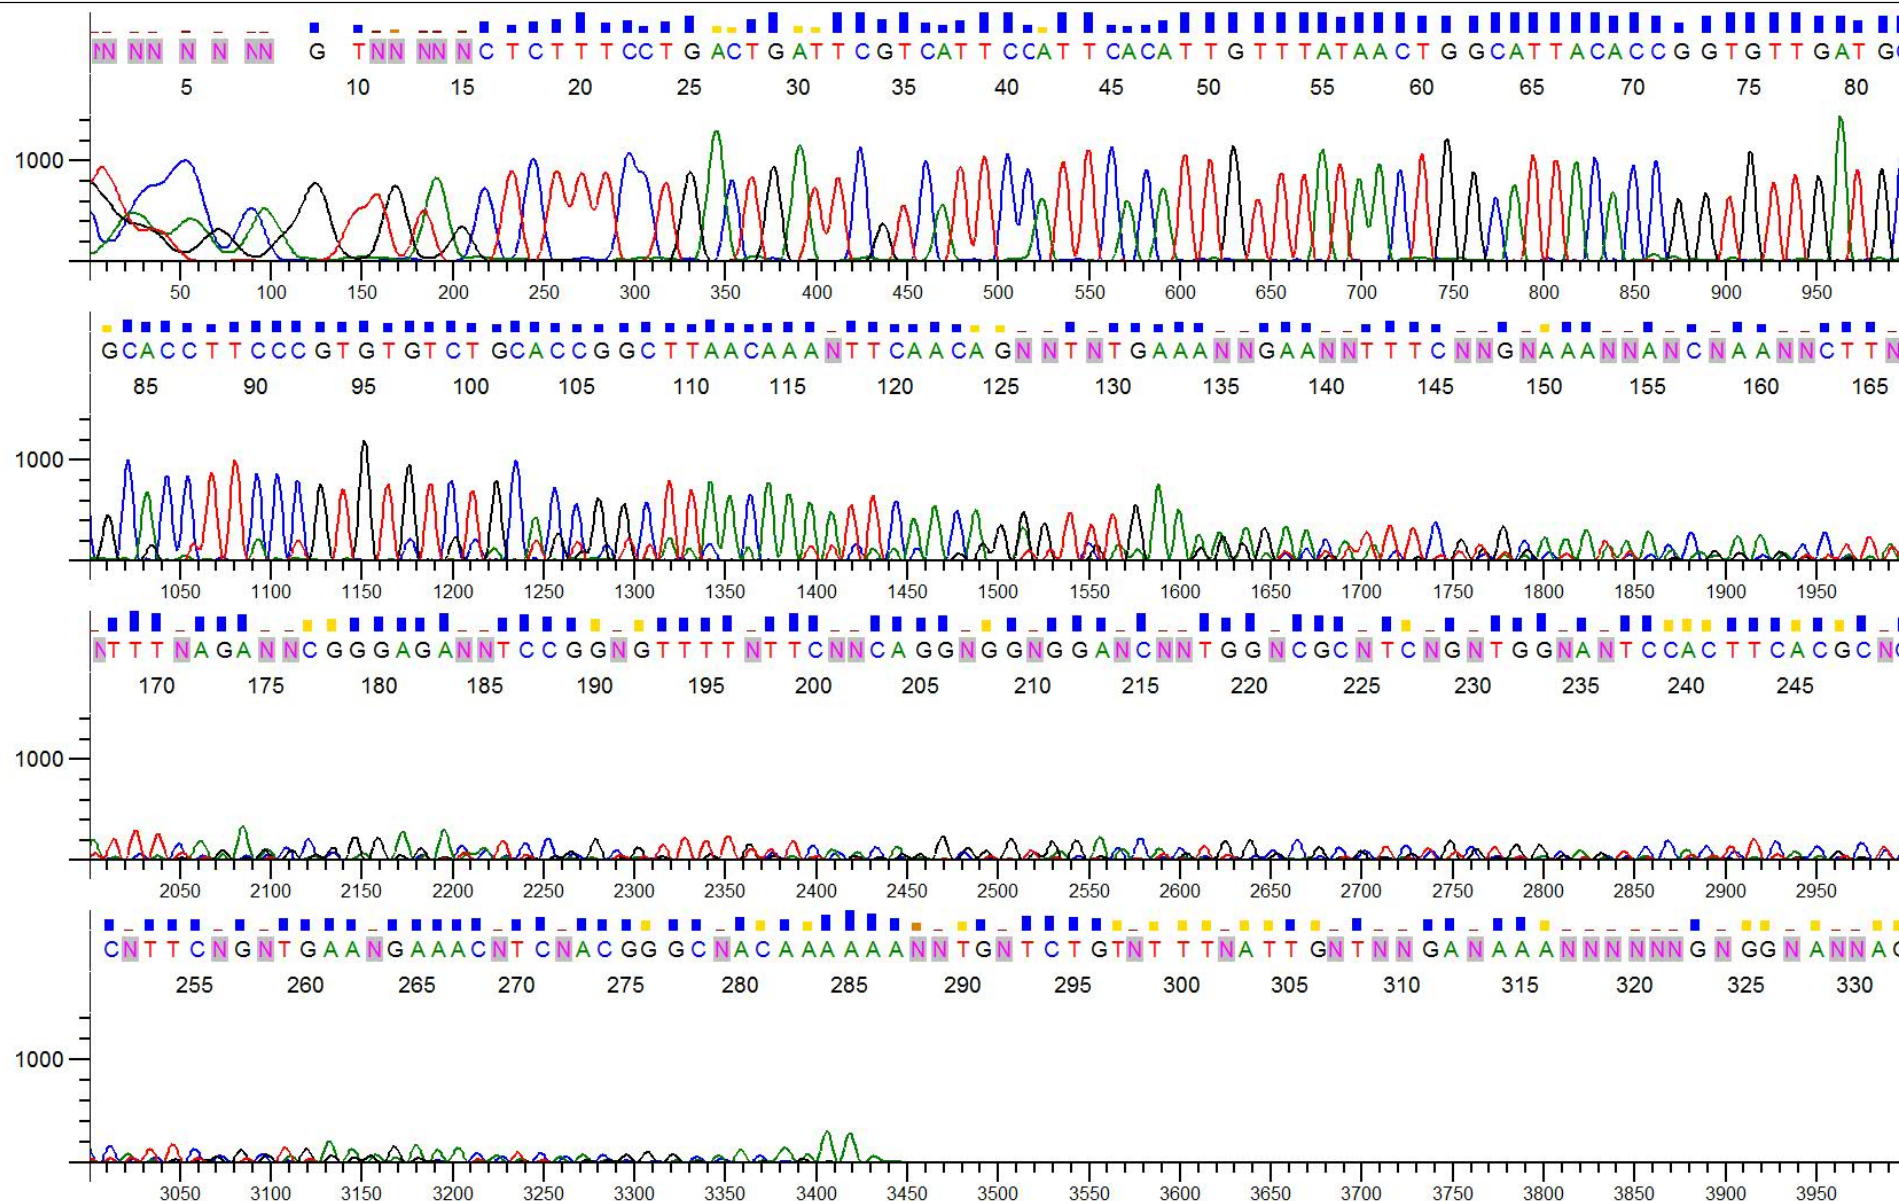

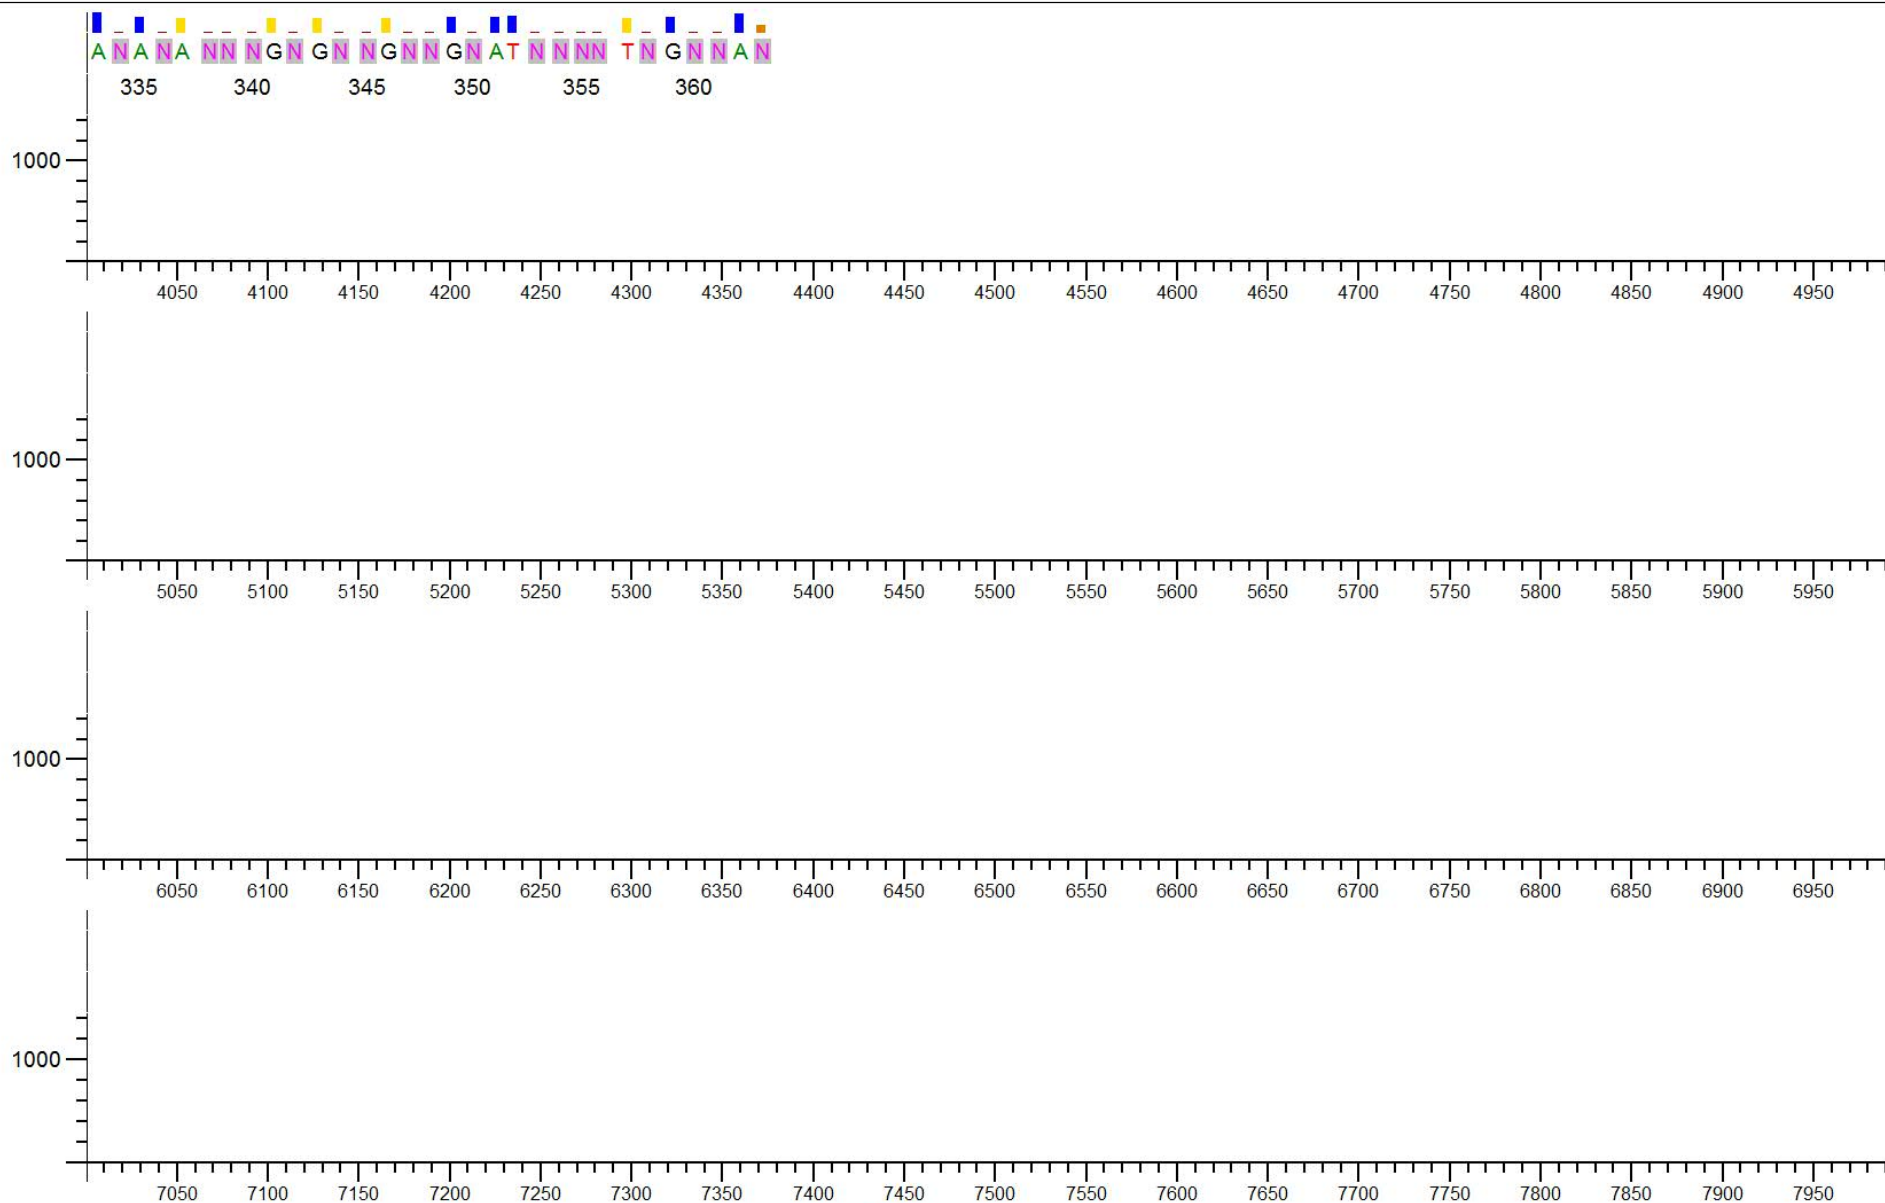

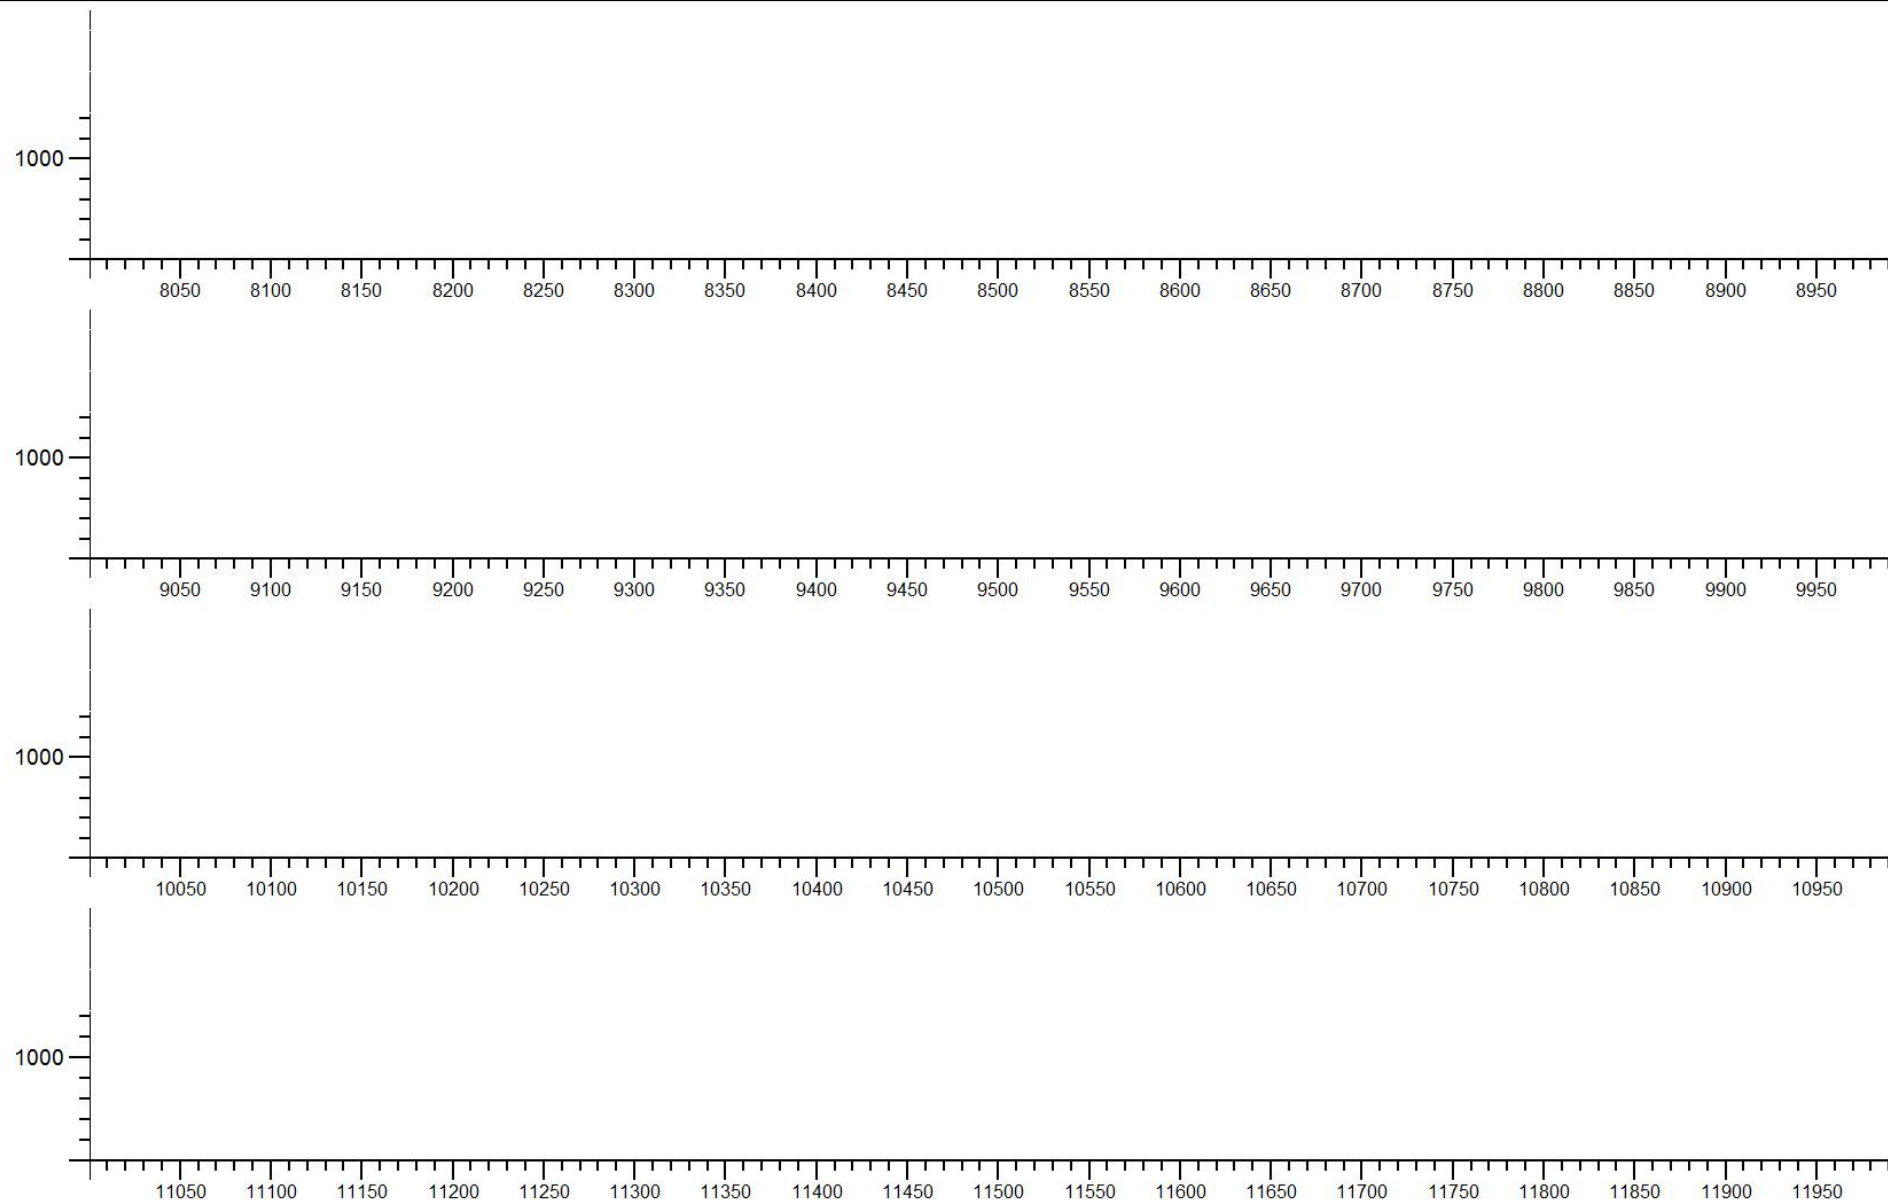

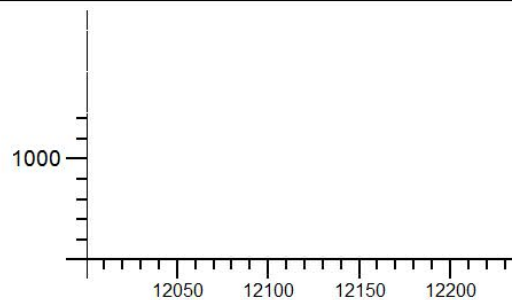

Supplement: raw_material.zip [file raw_material.zip]

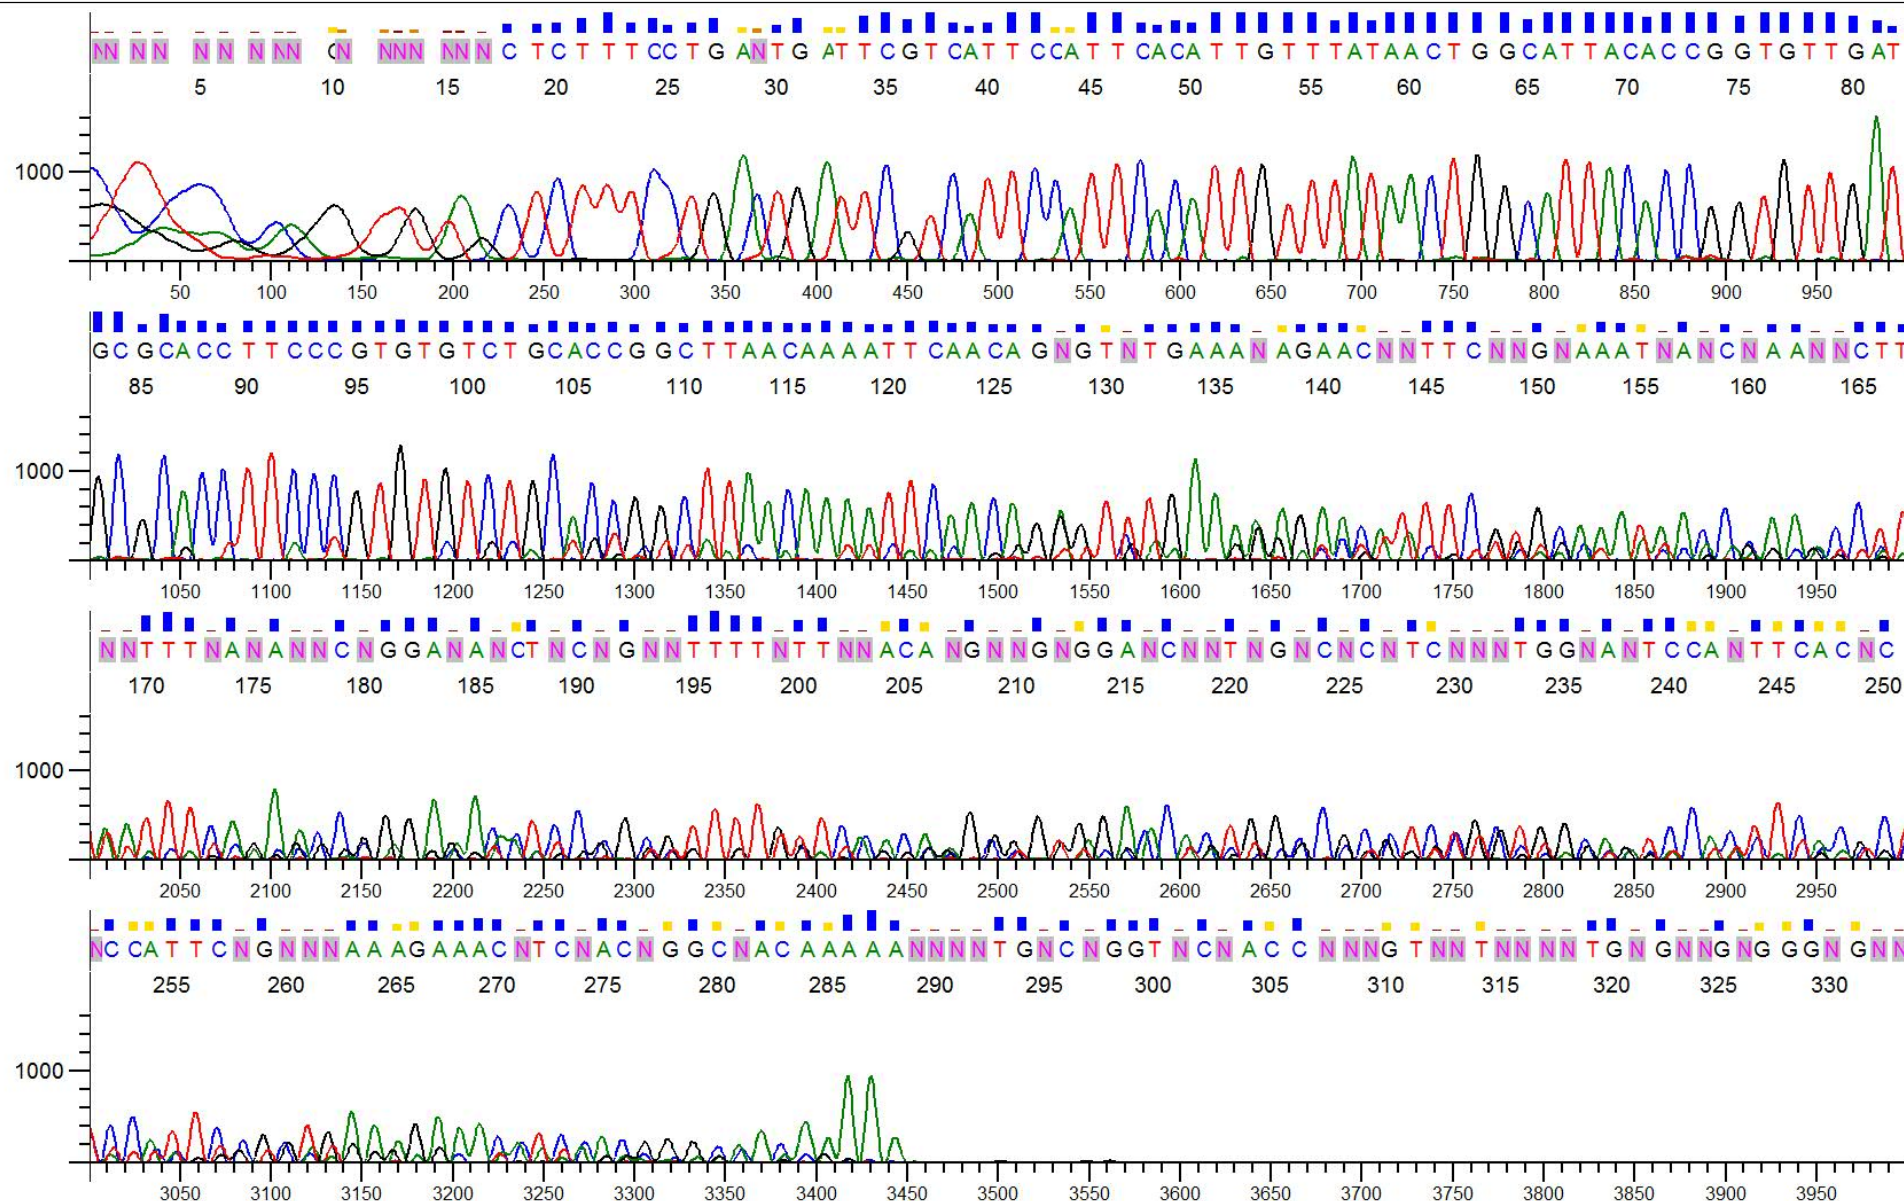

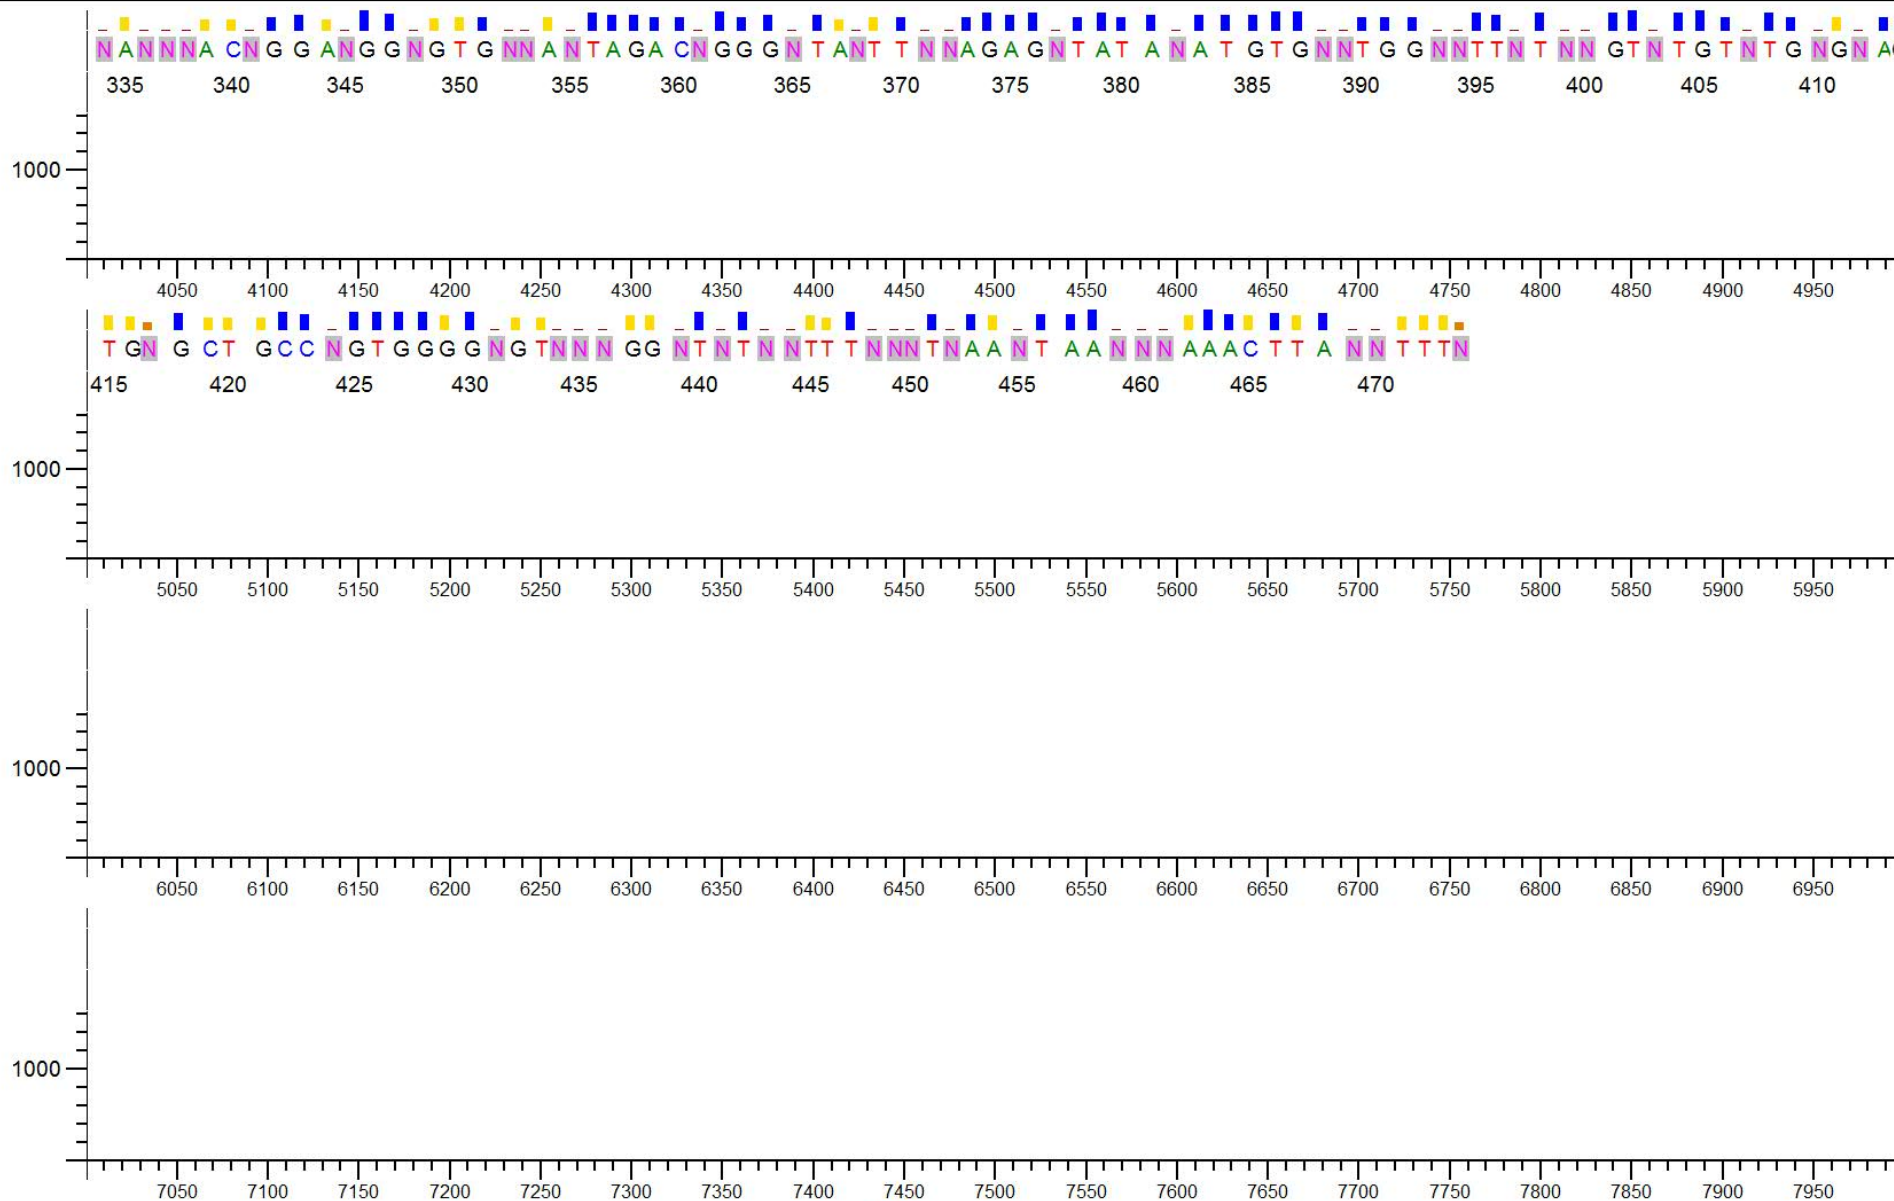

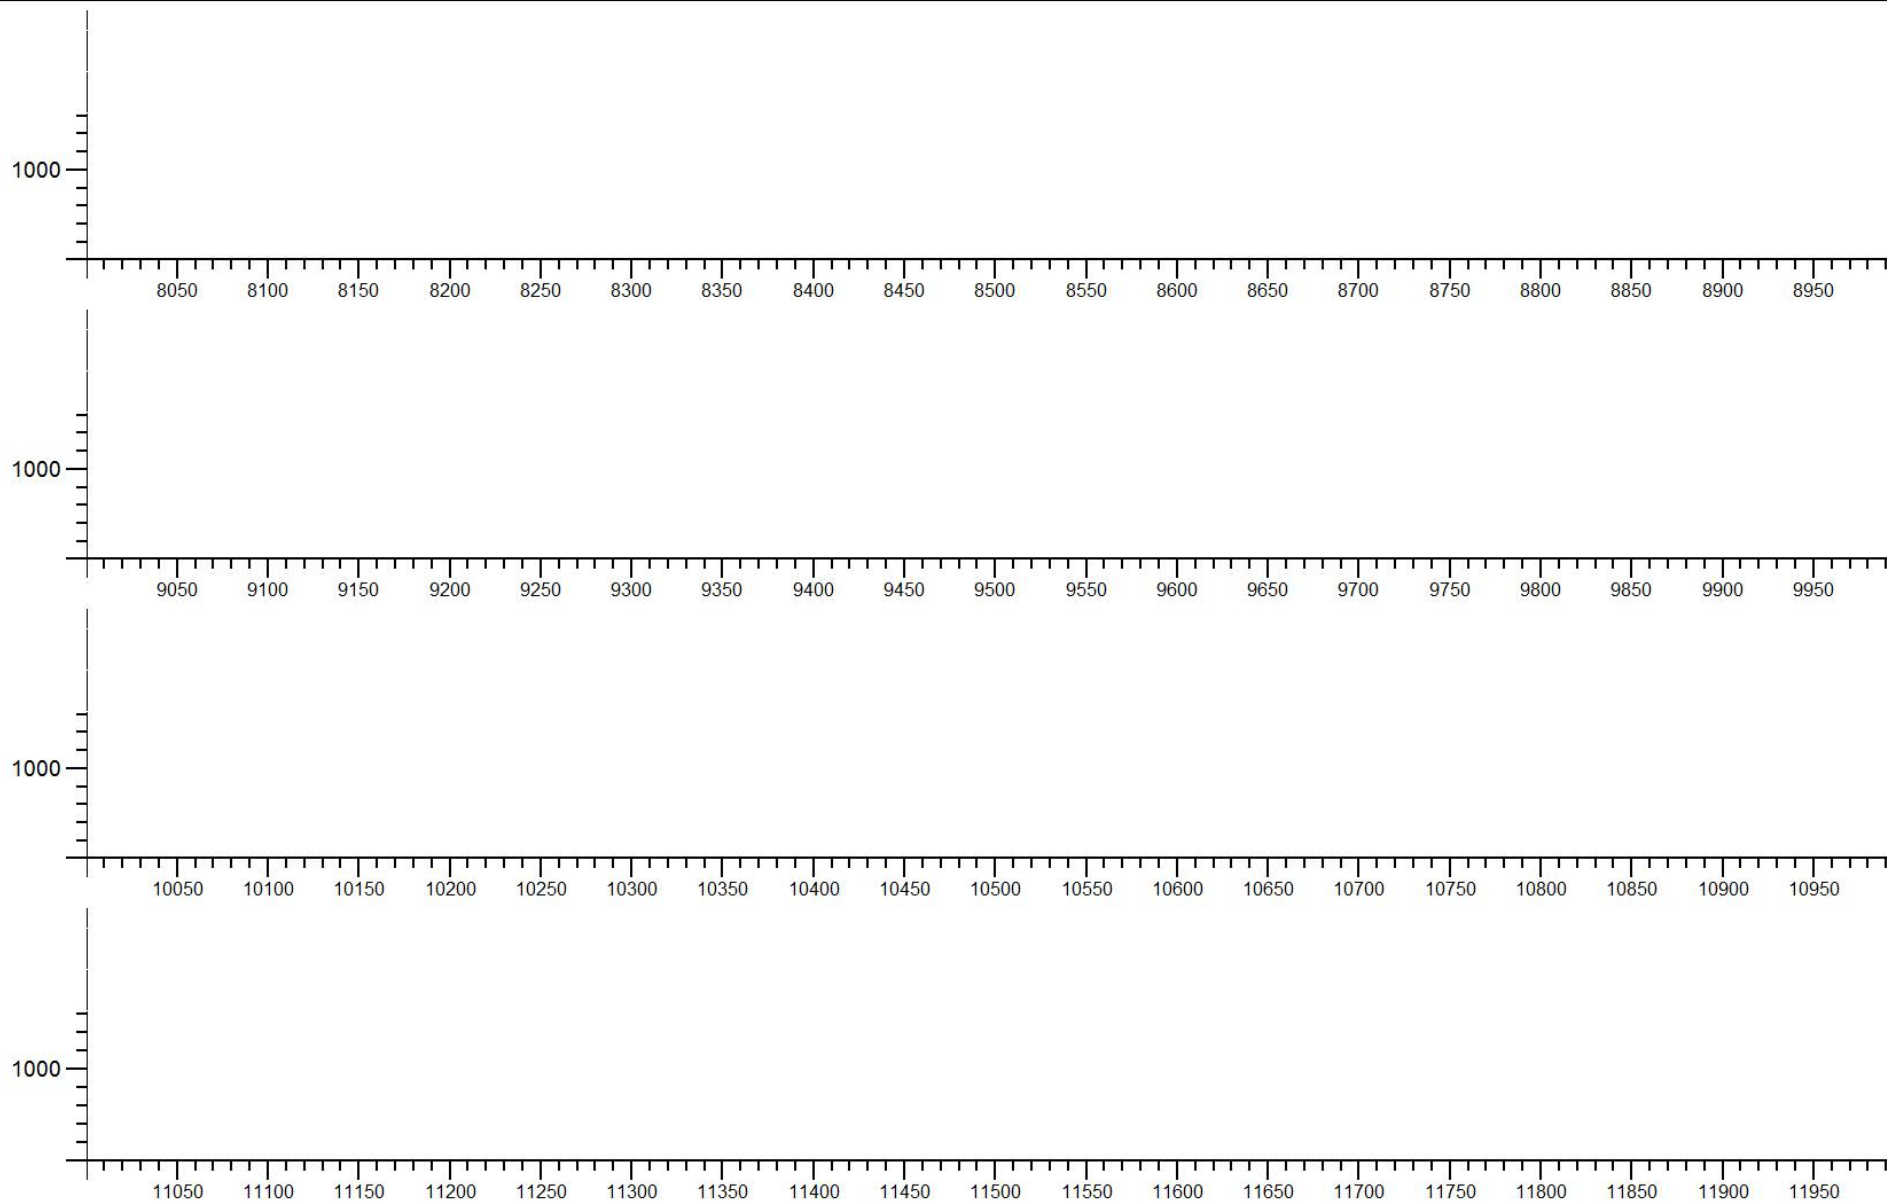

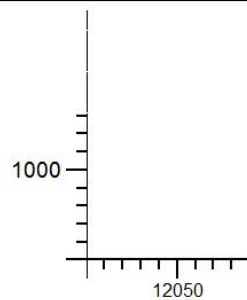

Supplement: raw_material.zip [file raw_material.zip]

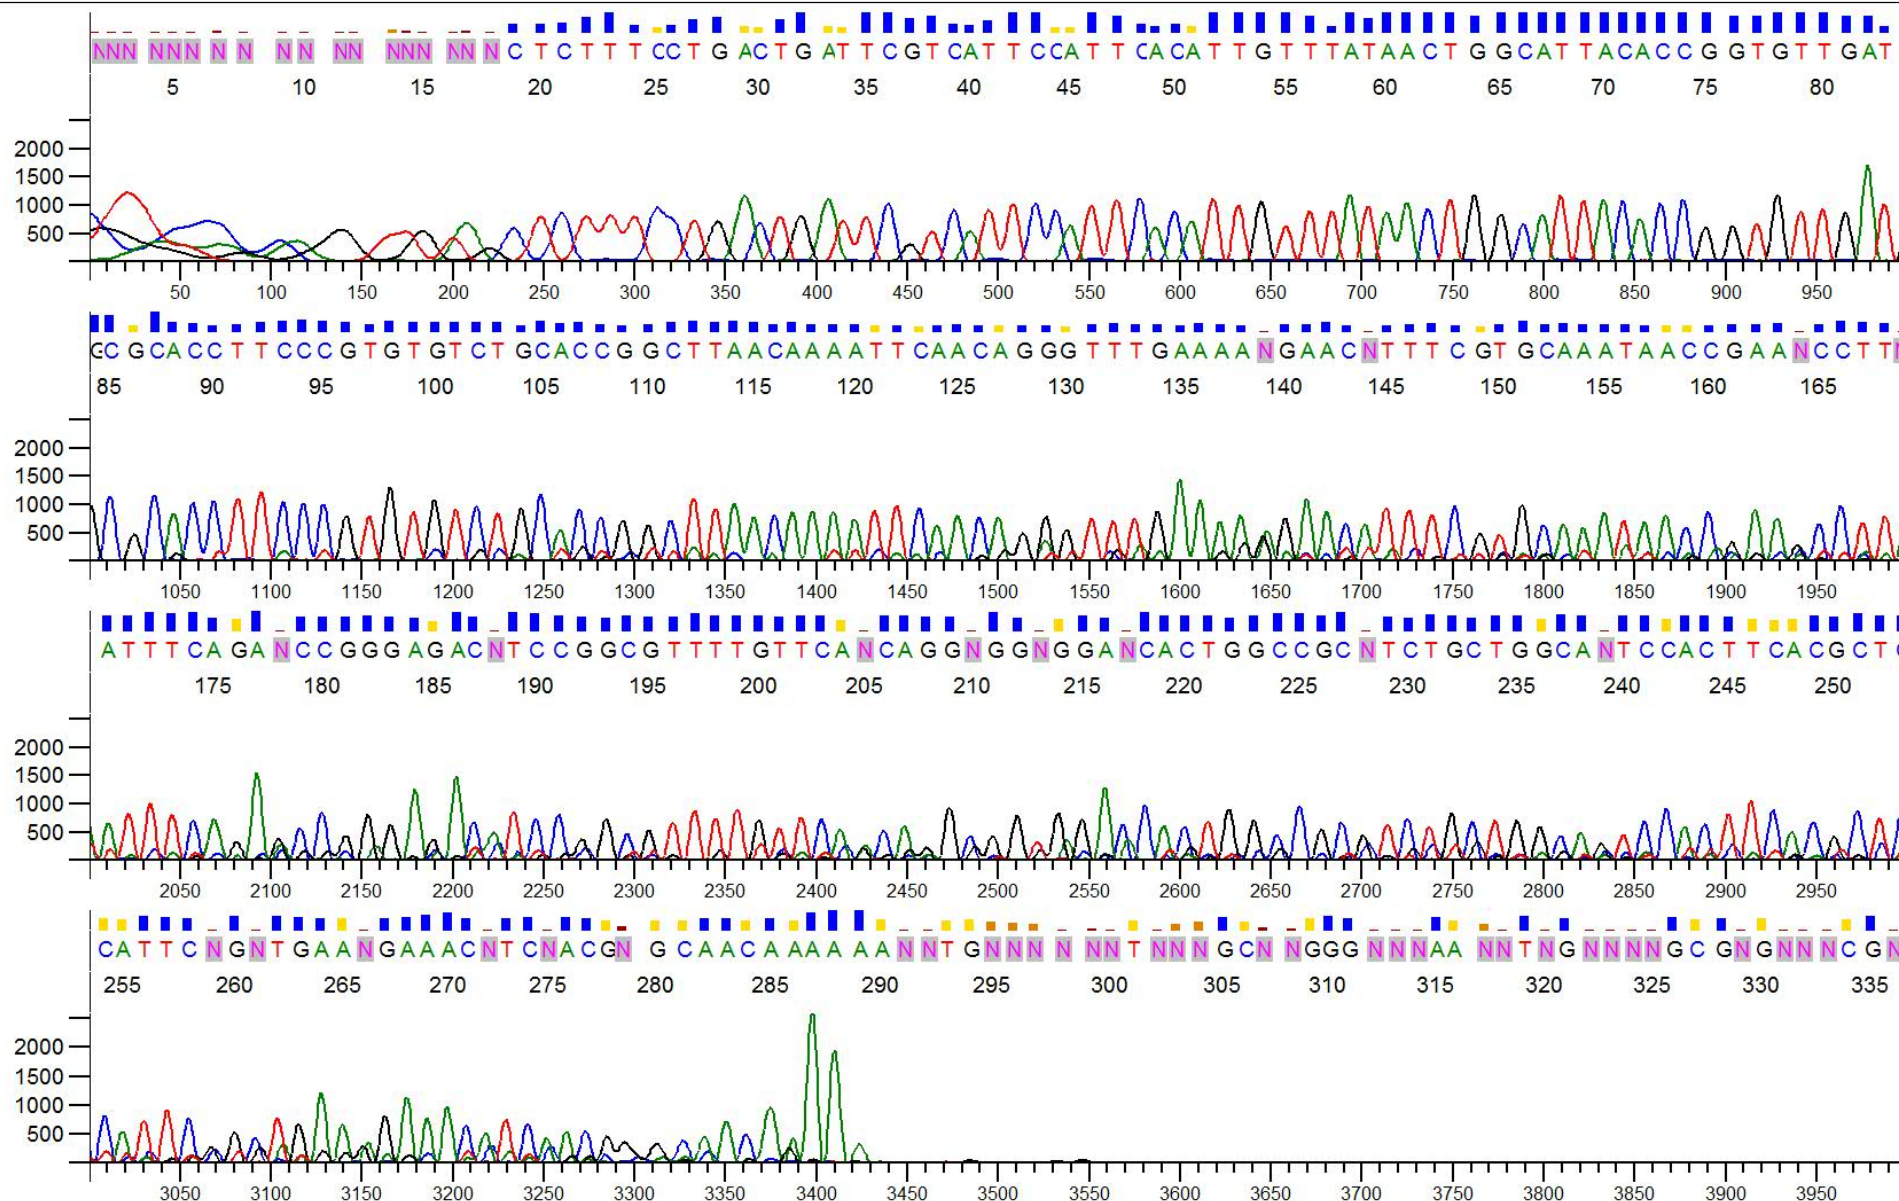

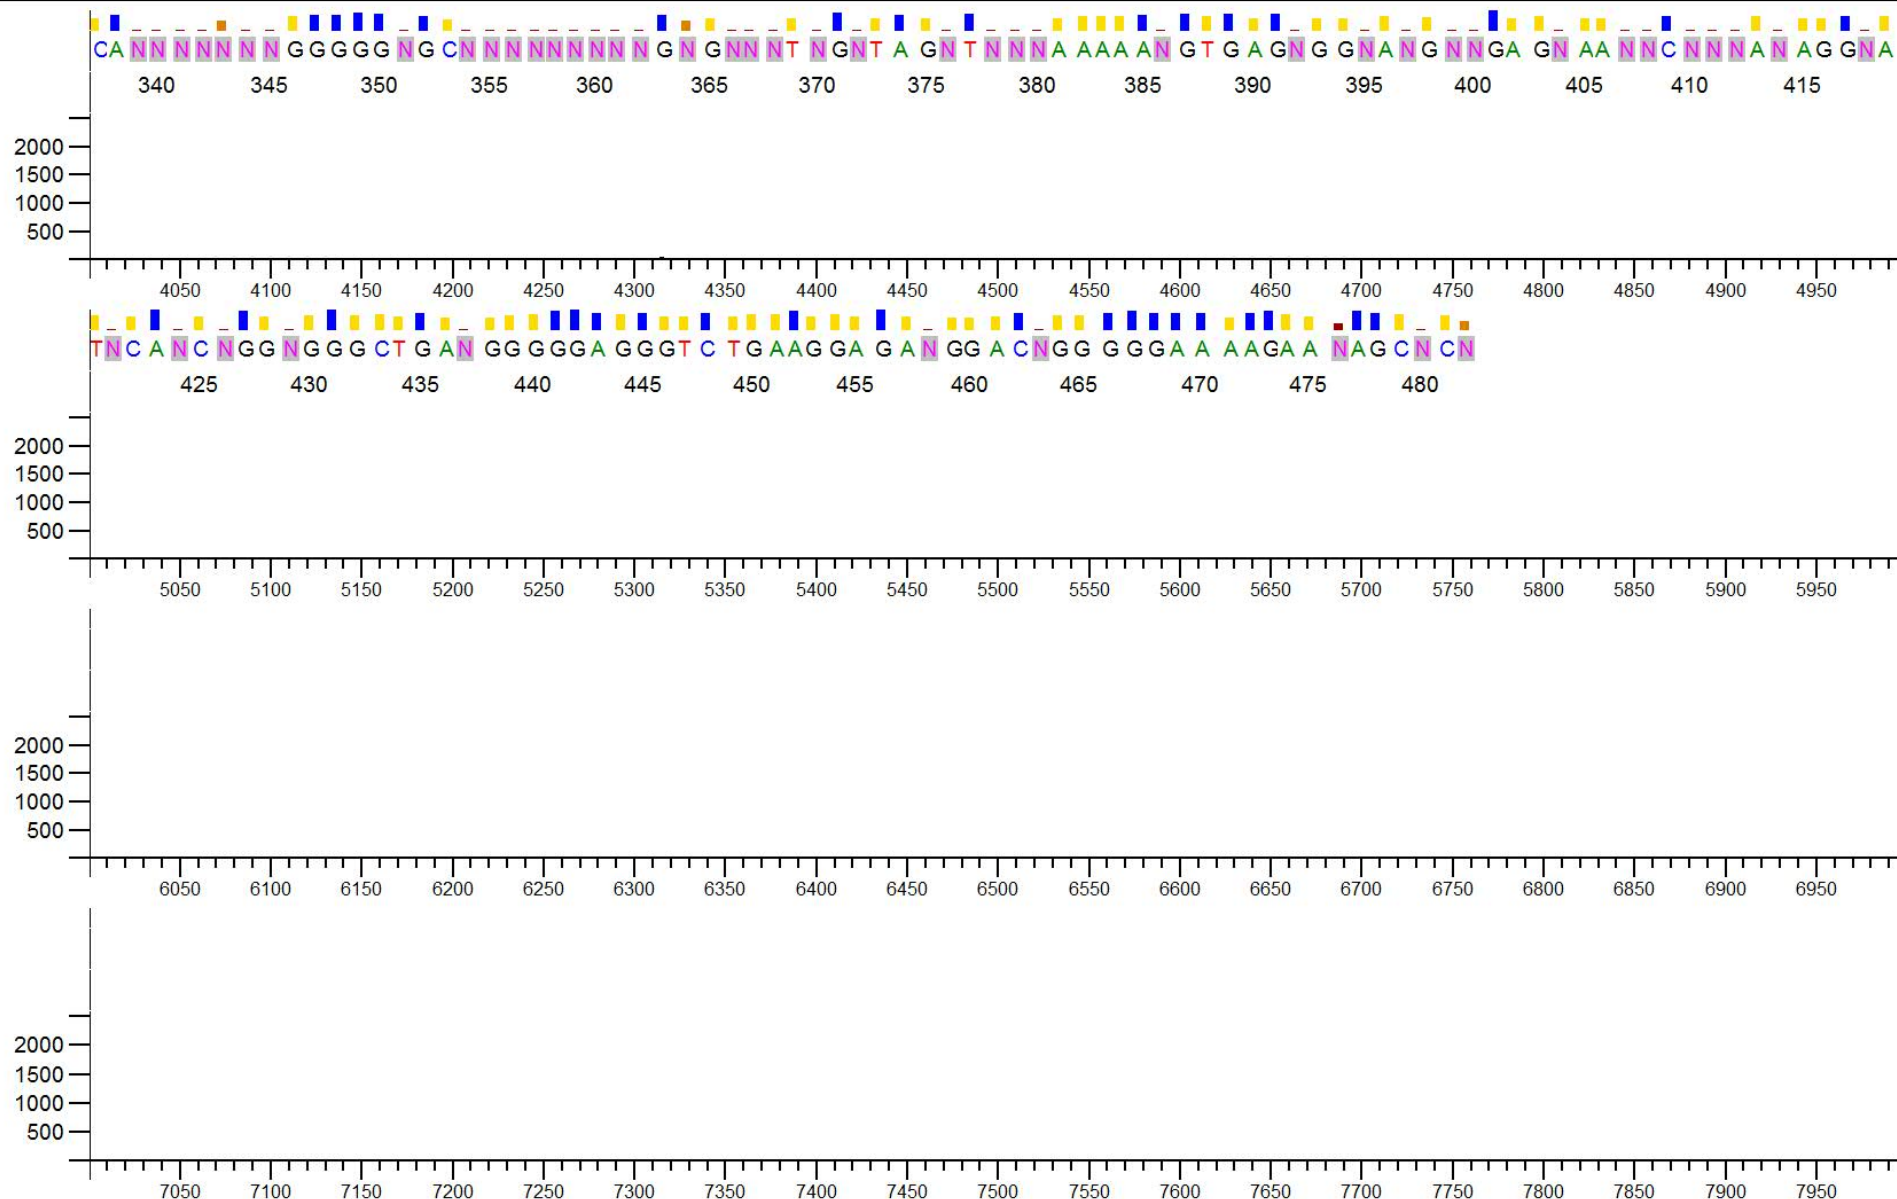

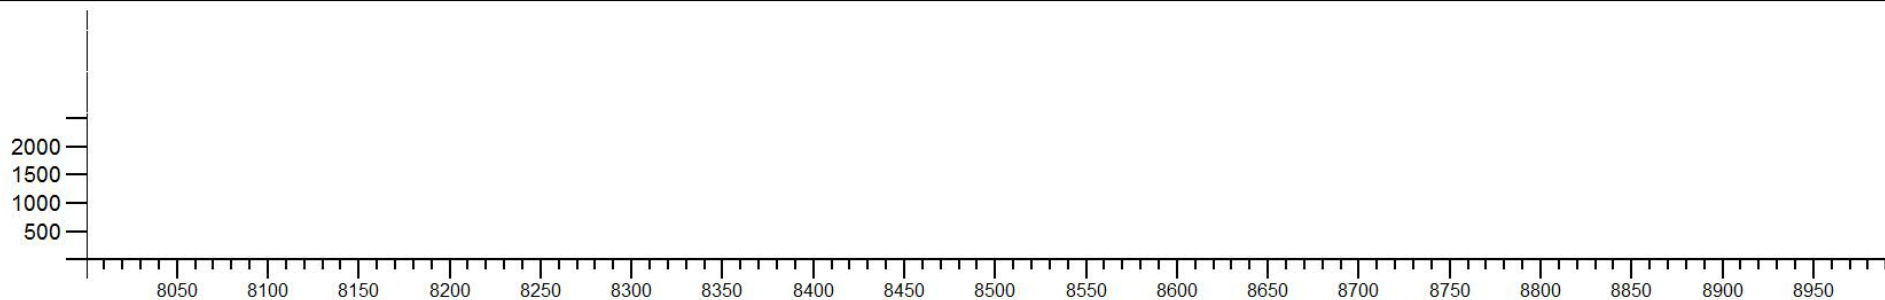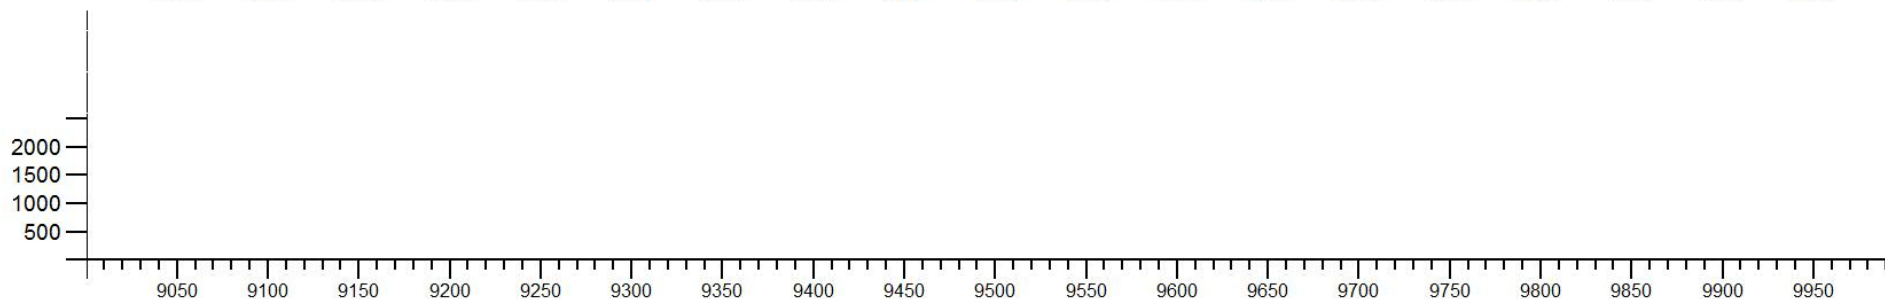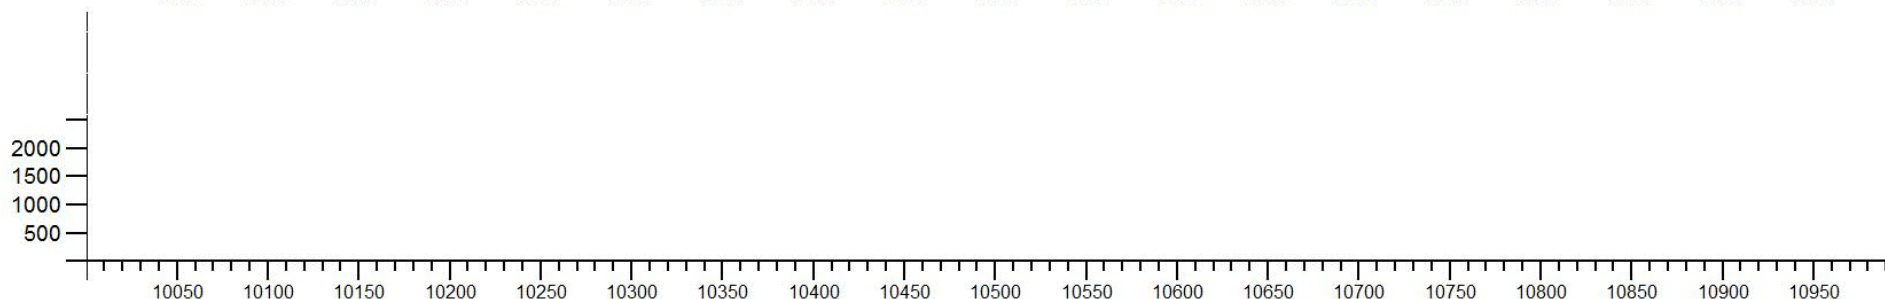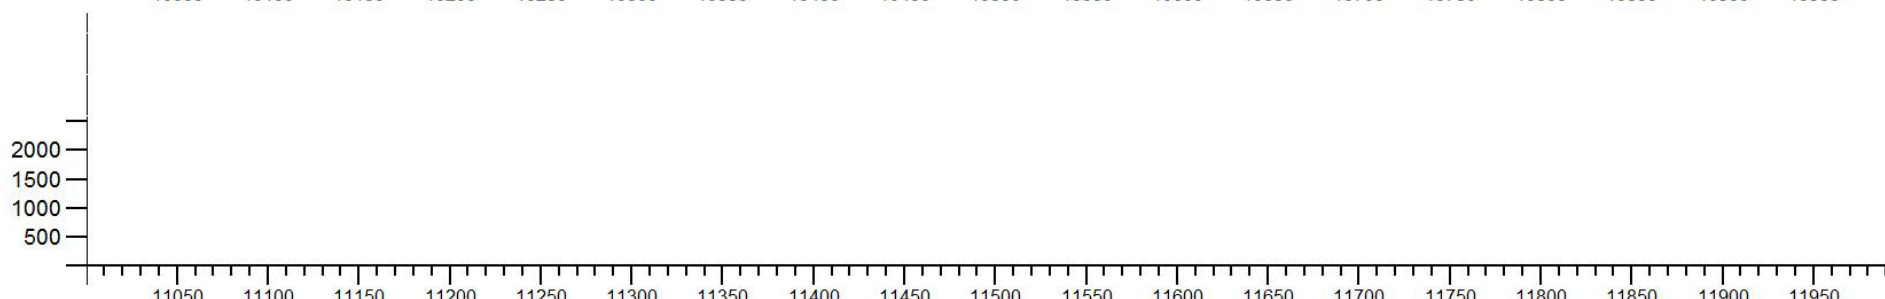



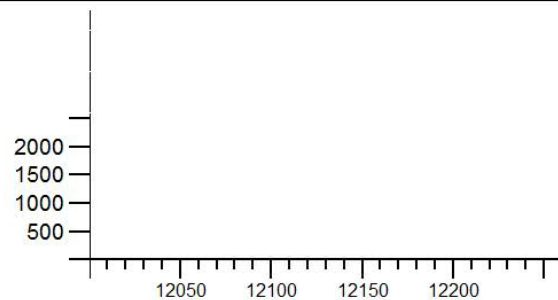

Supplement: raw_material.zip [file raw_material.zip]

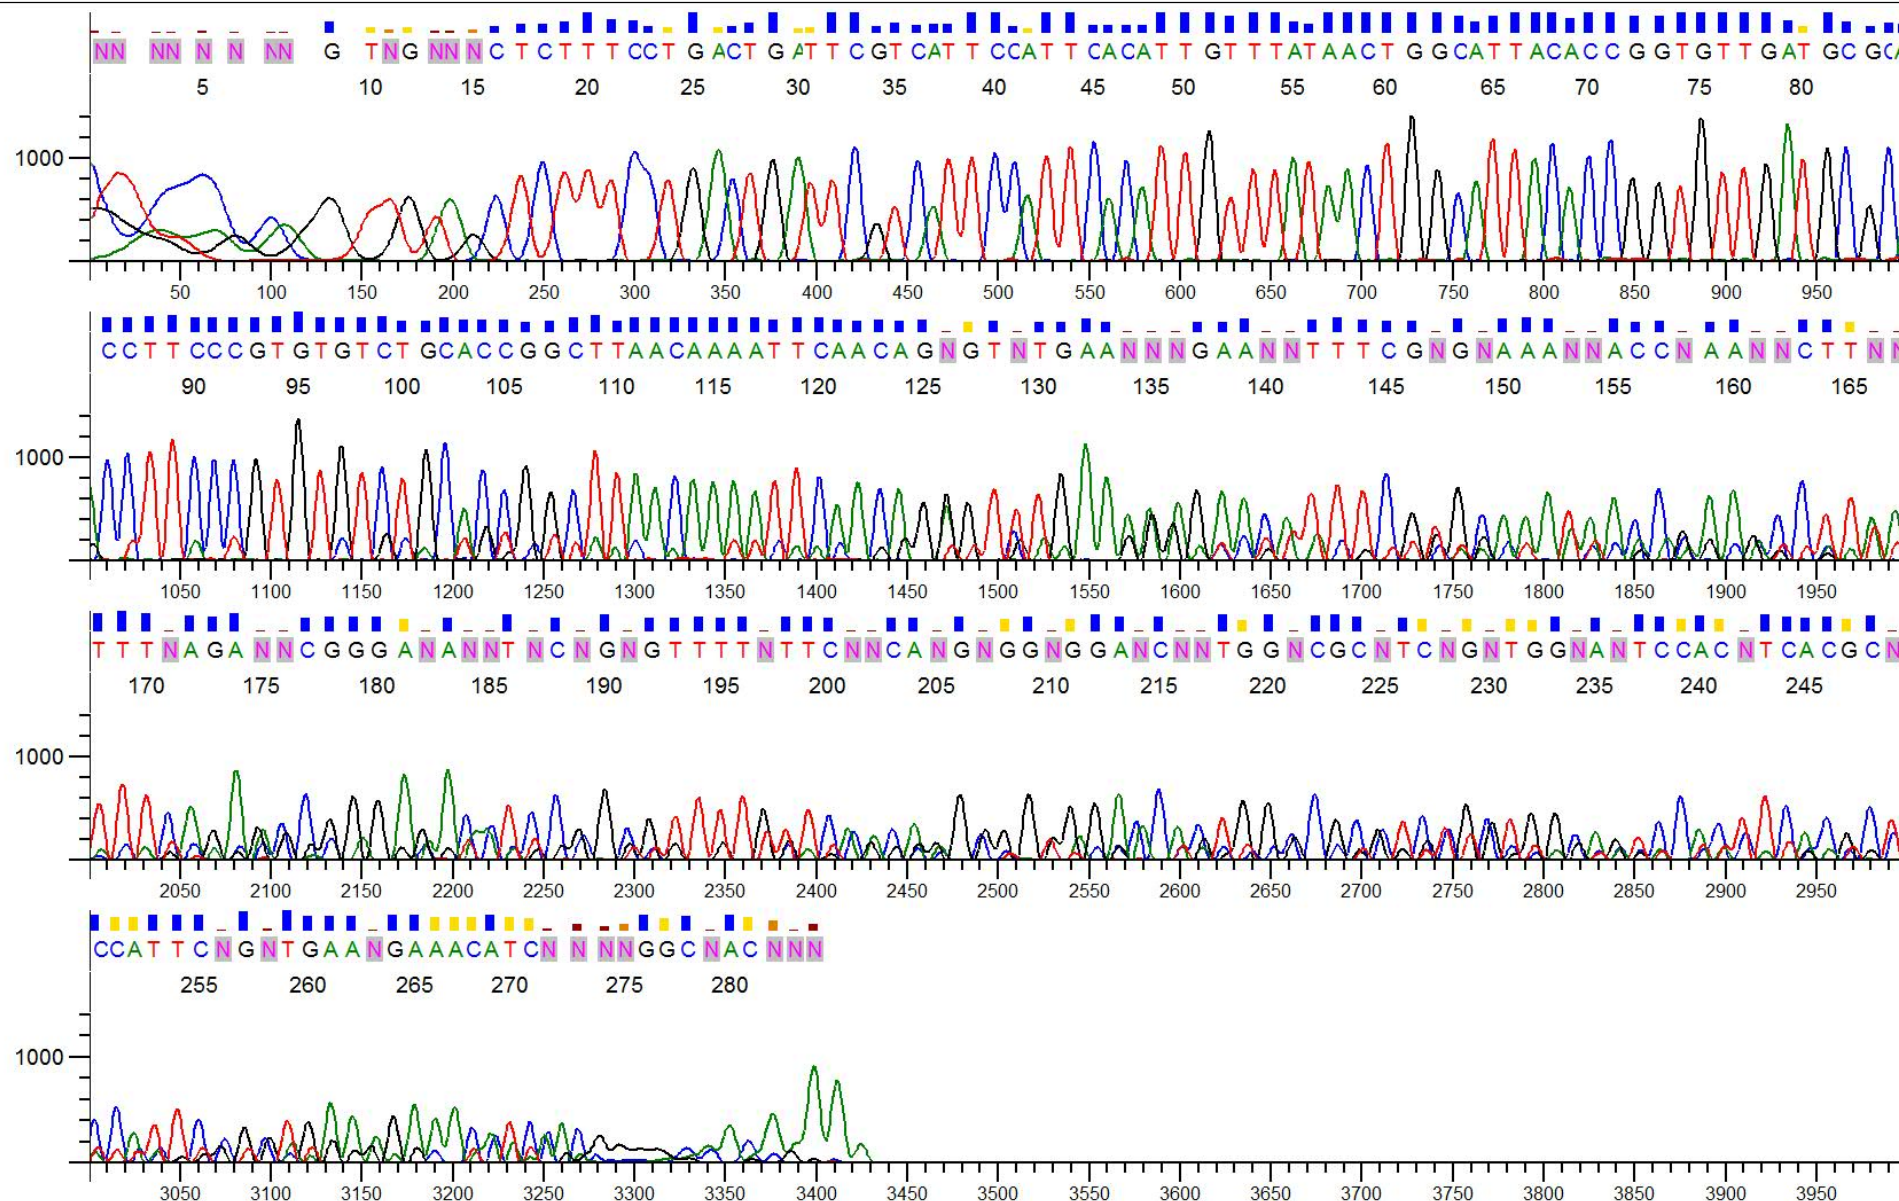

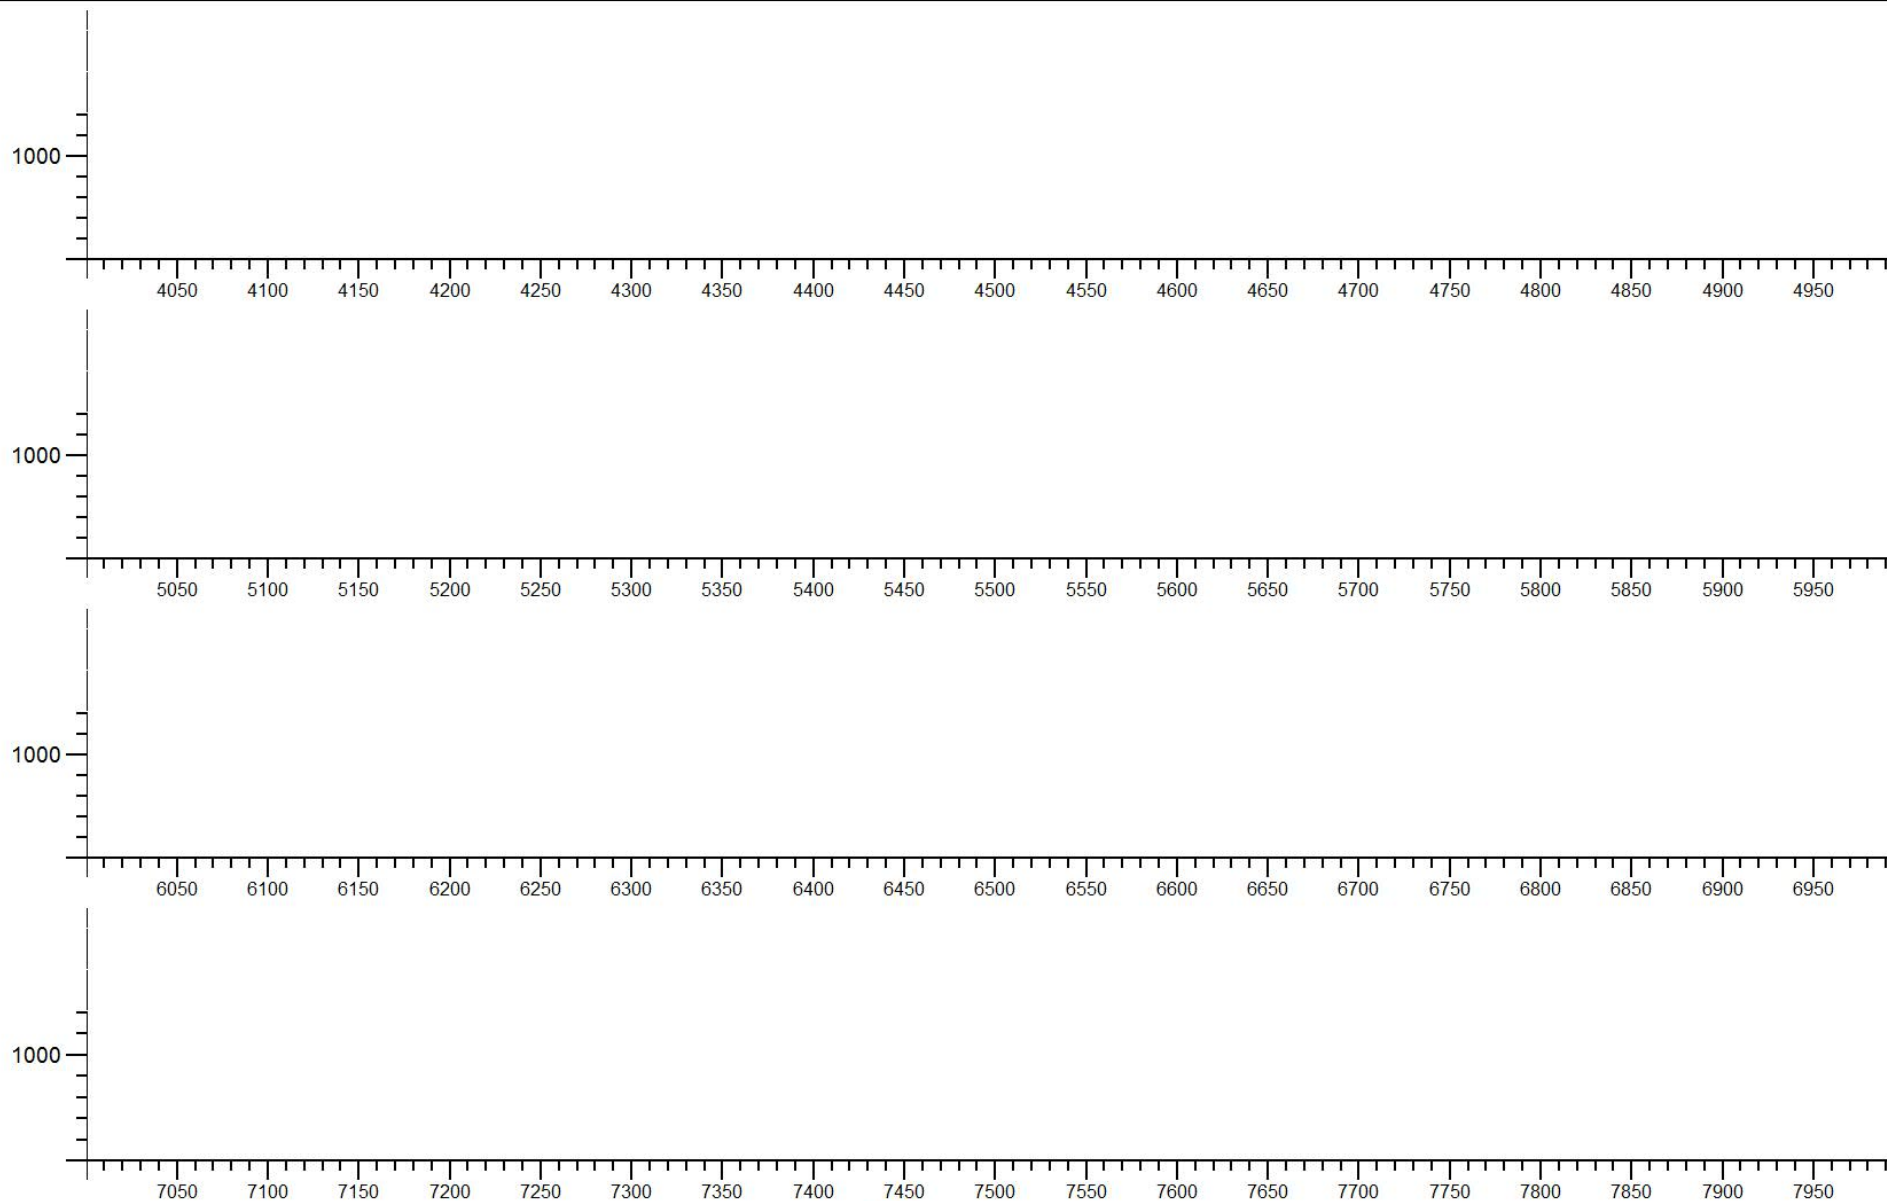

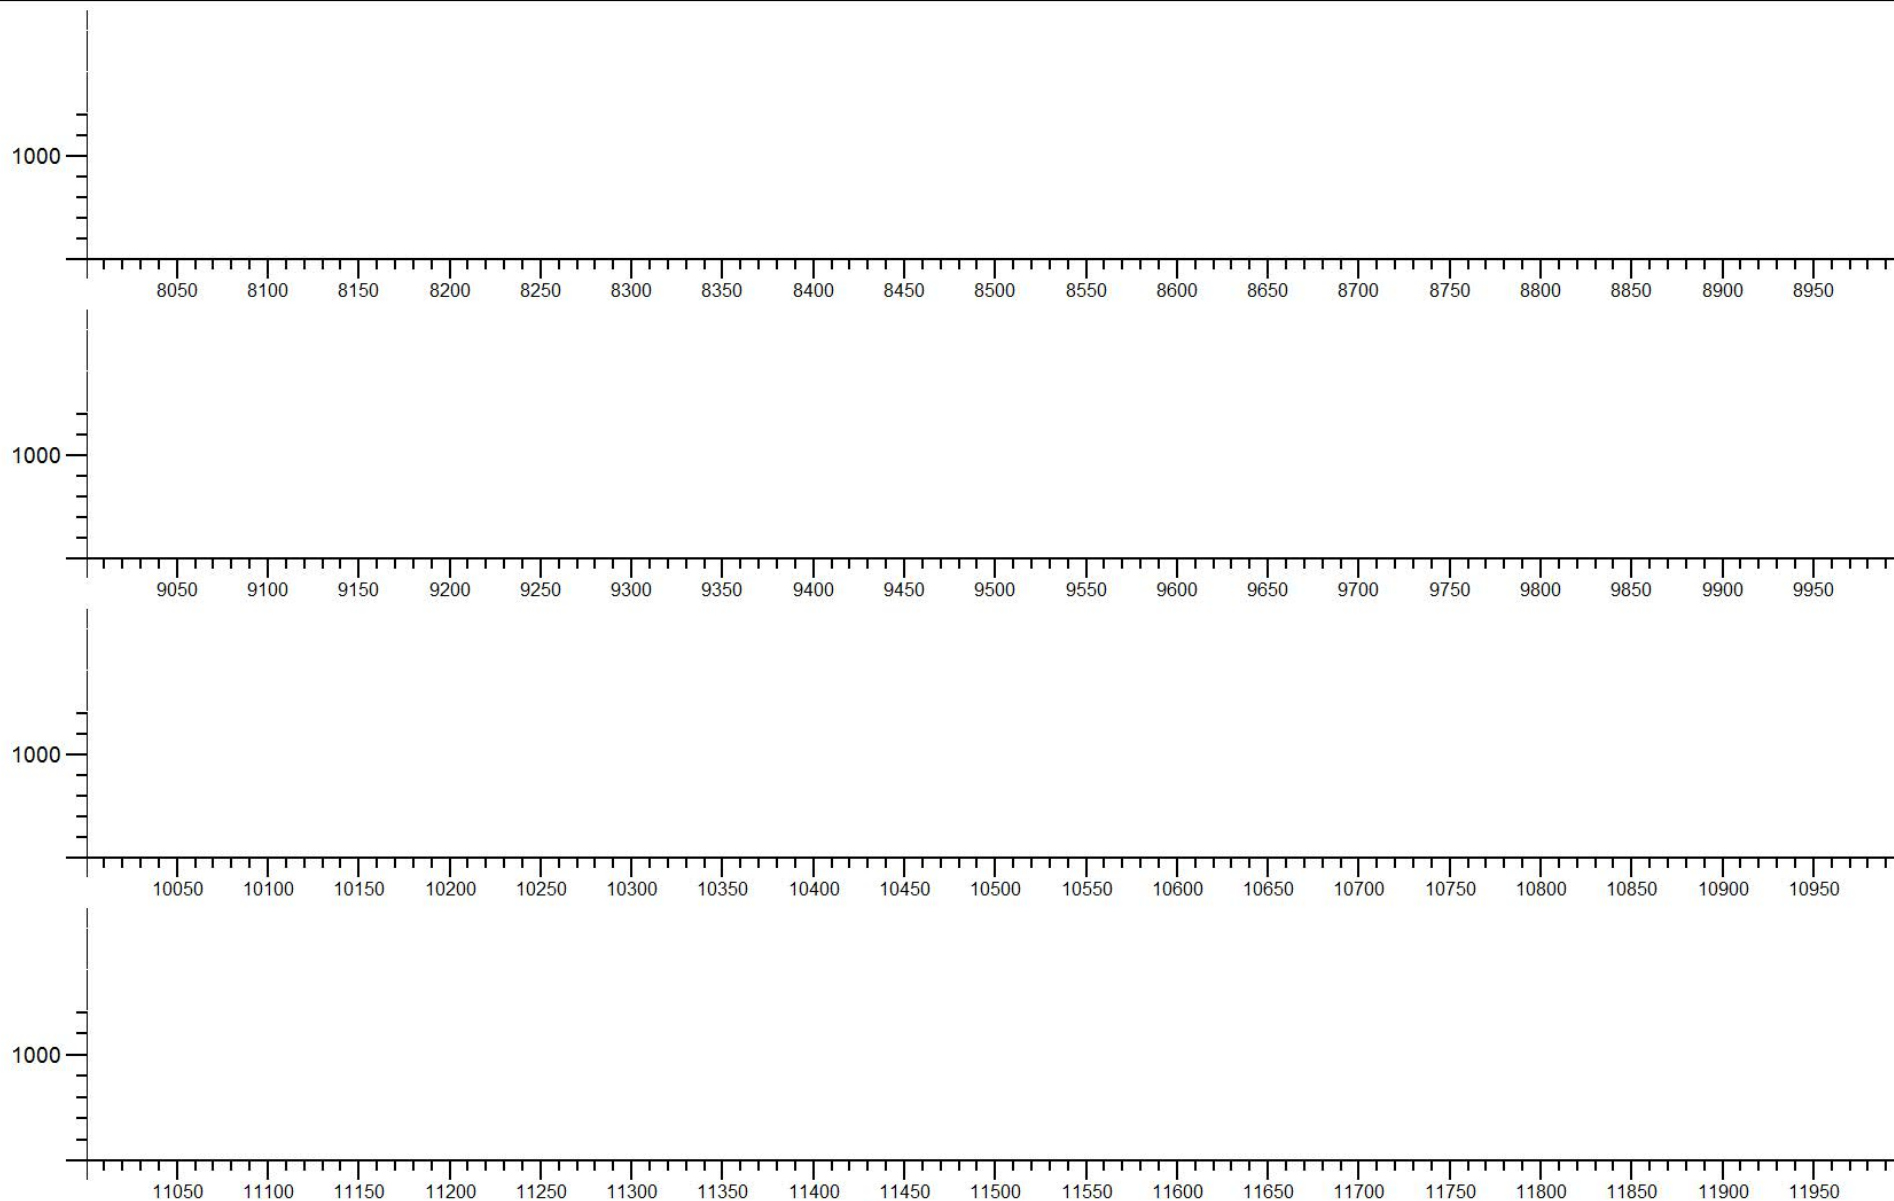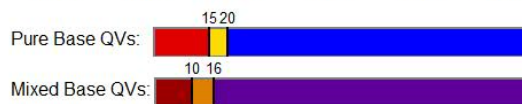

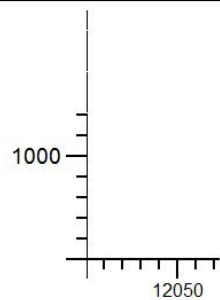

Supplement: raw_material.zip [file raw_material.zip]

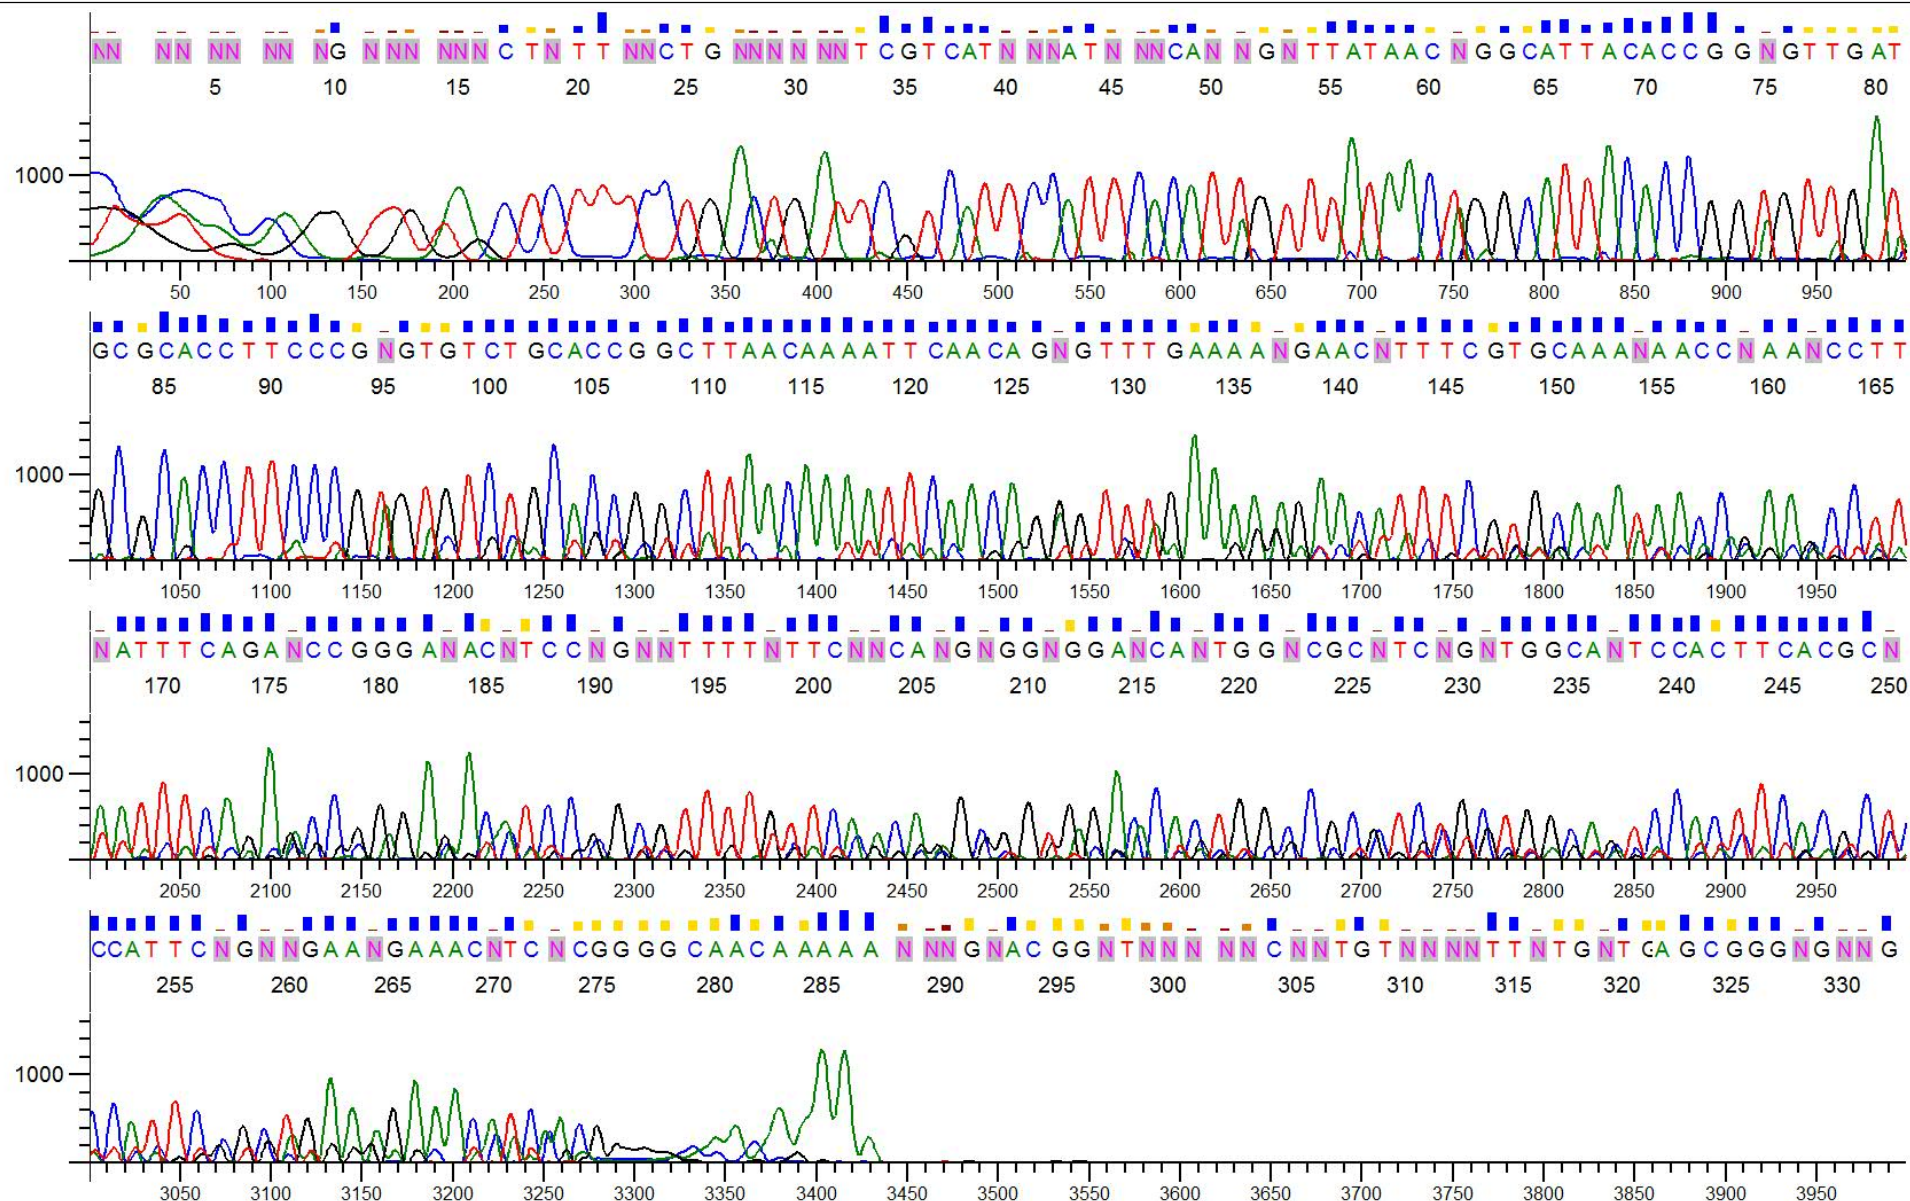

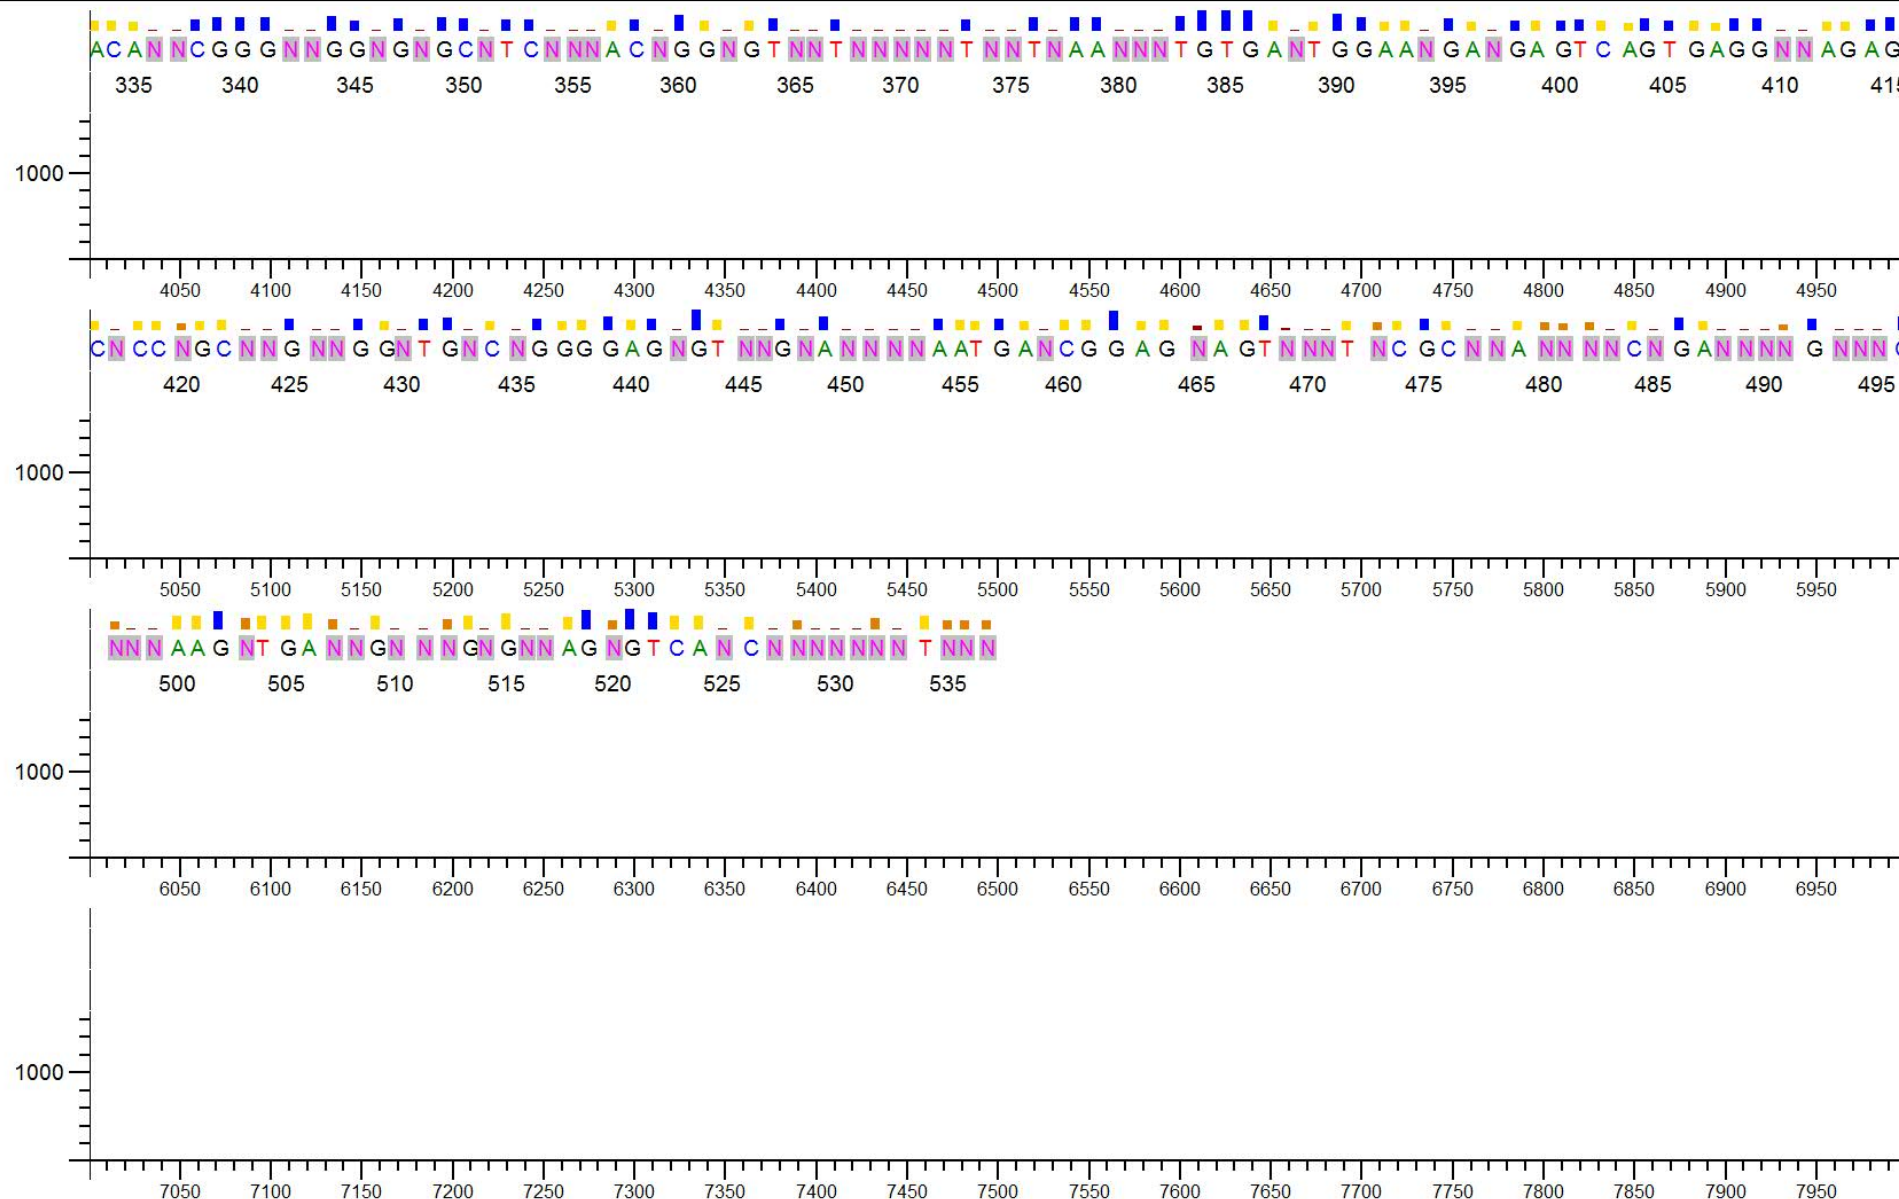

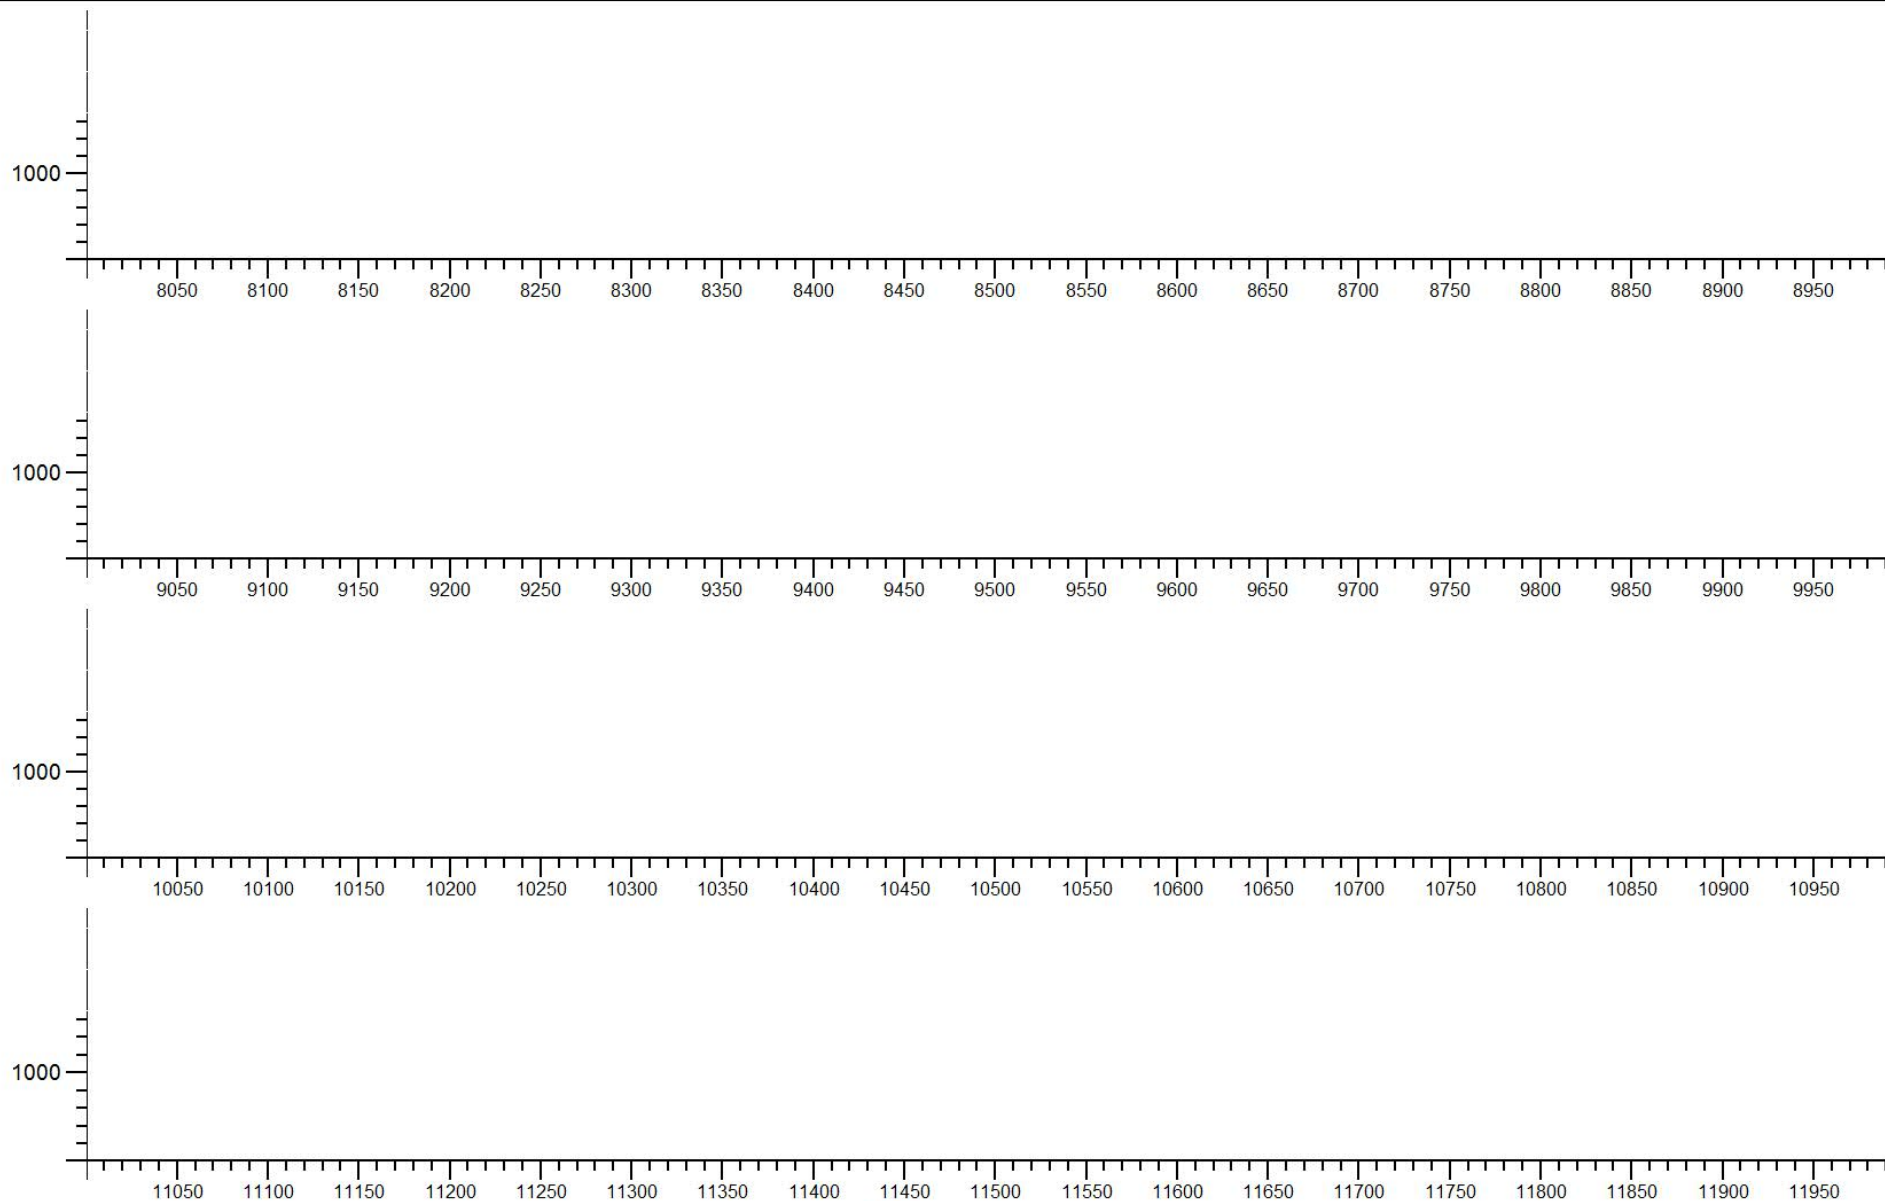



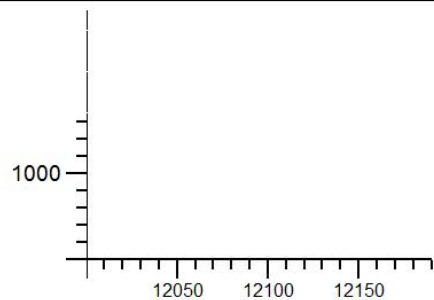

Supplement: raw_material.zip [file raw_material.zip]

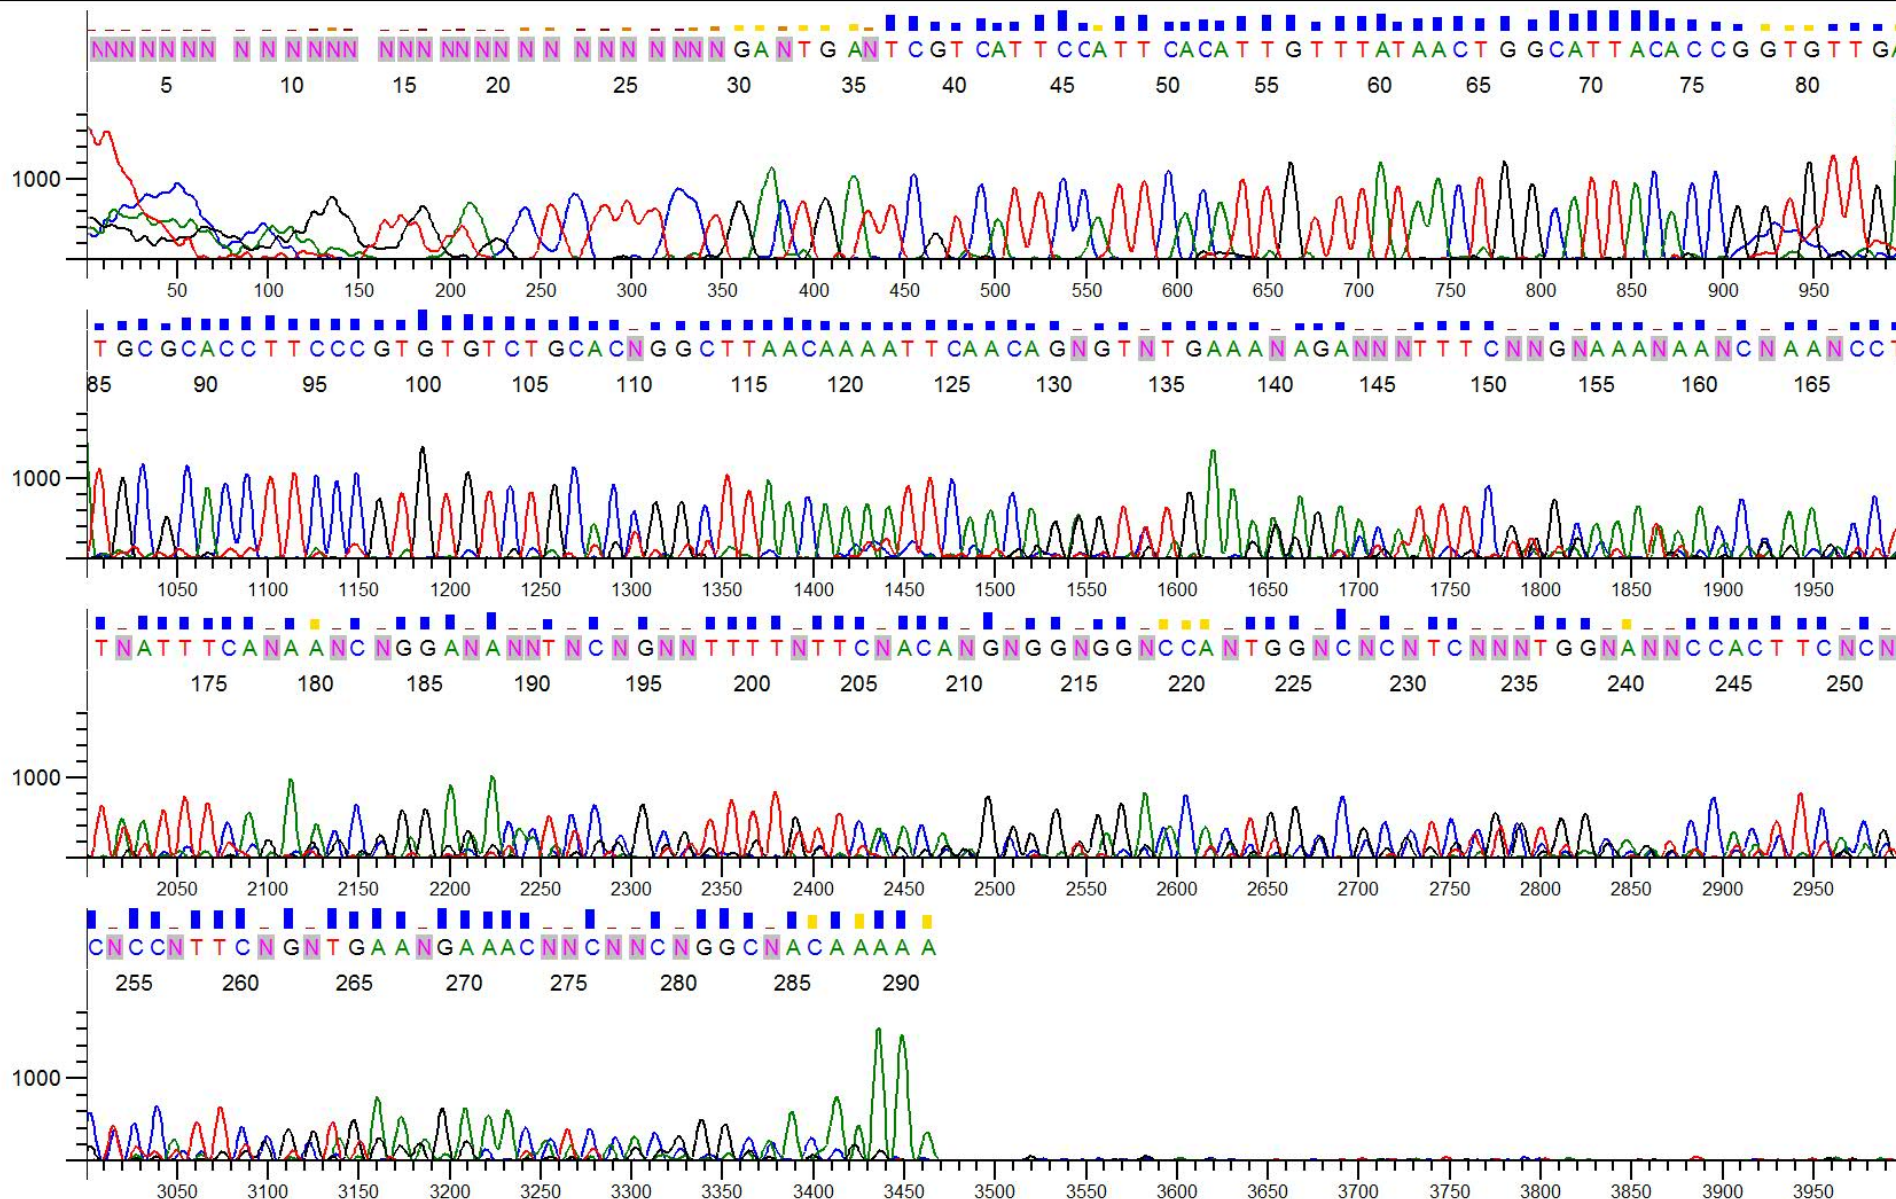

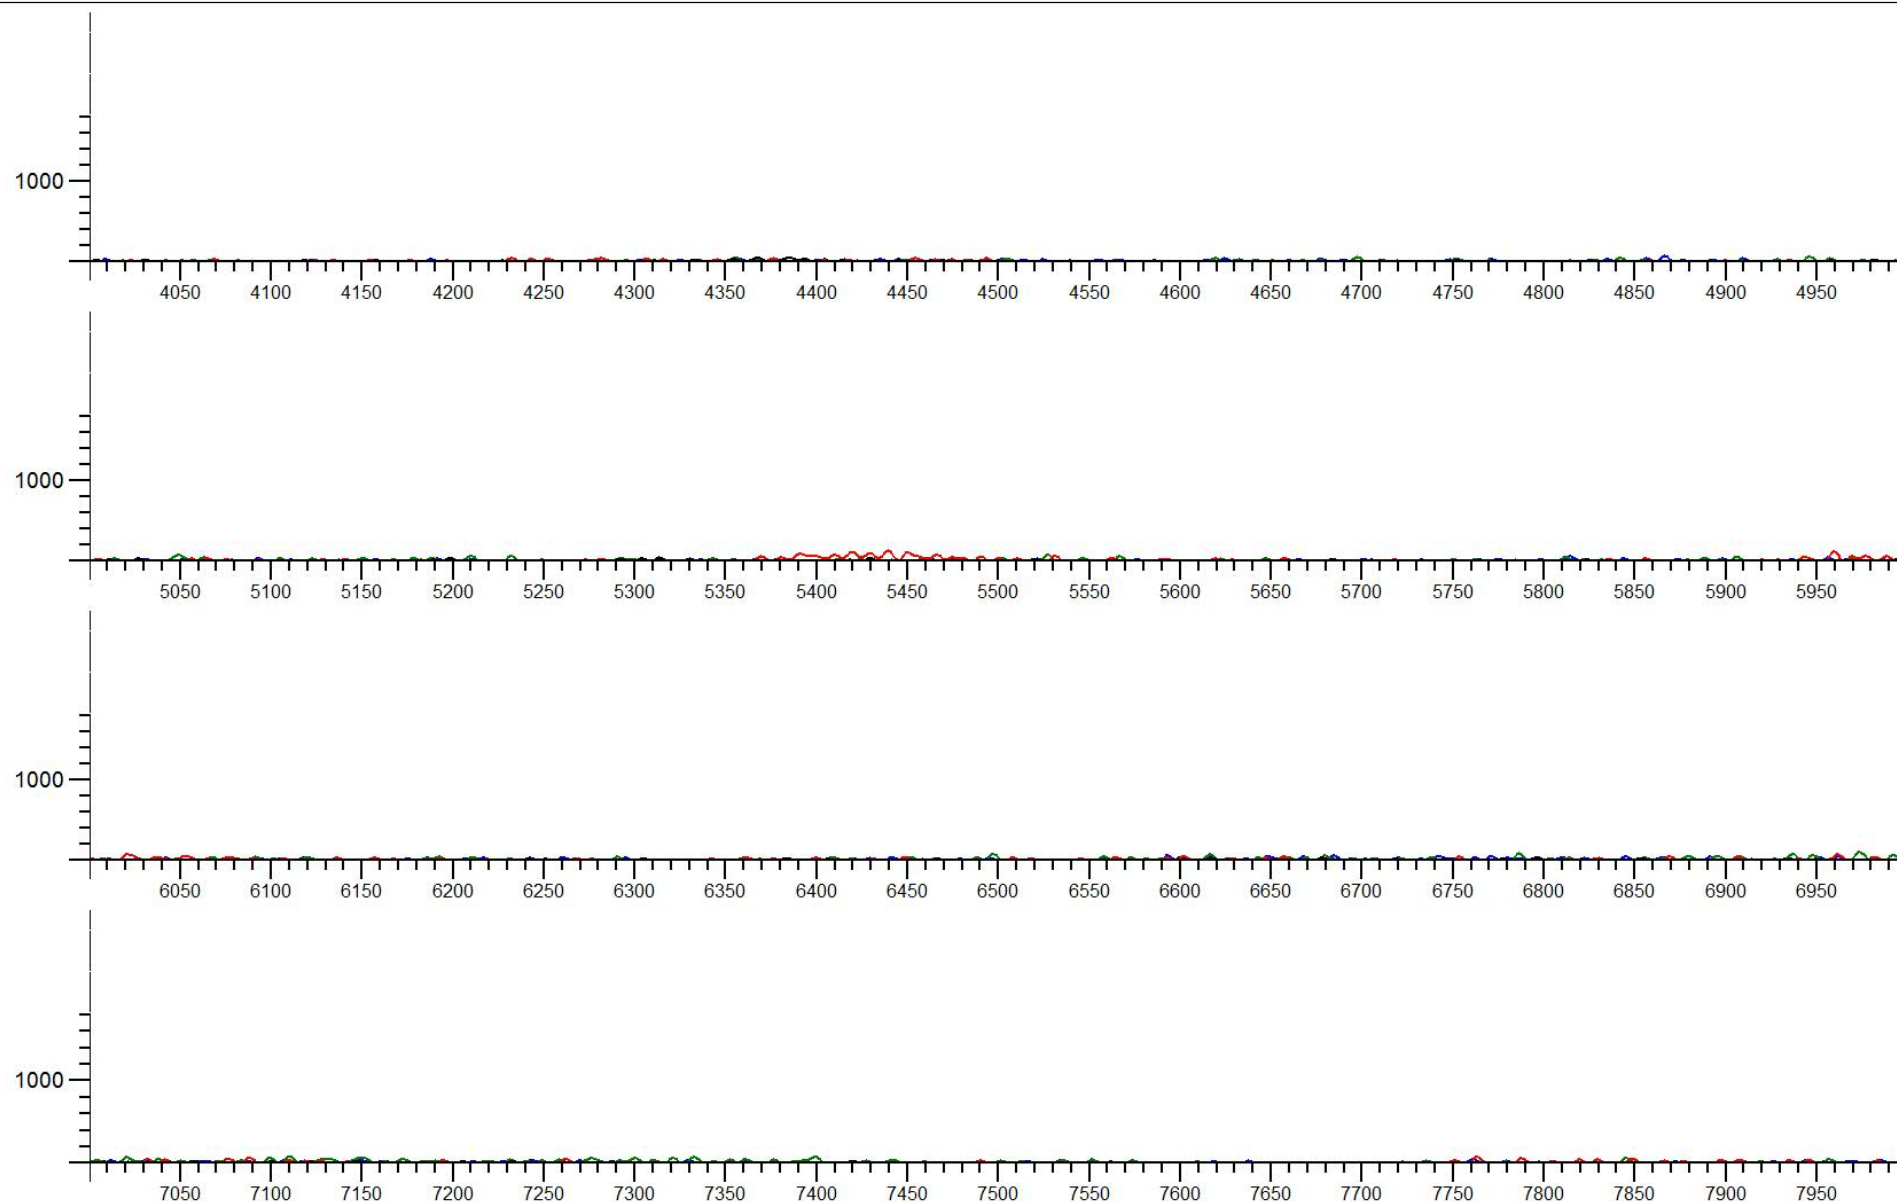

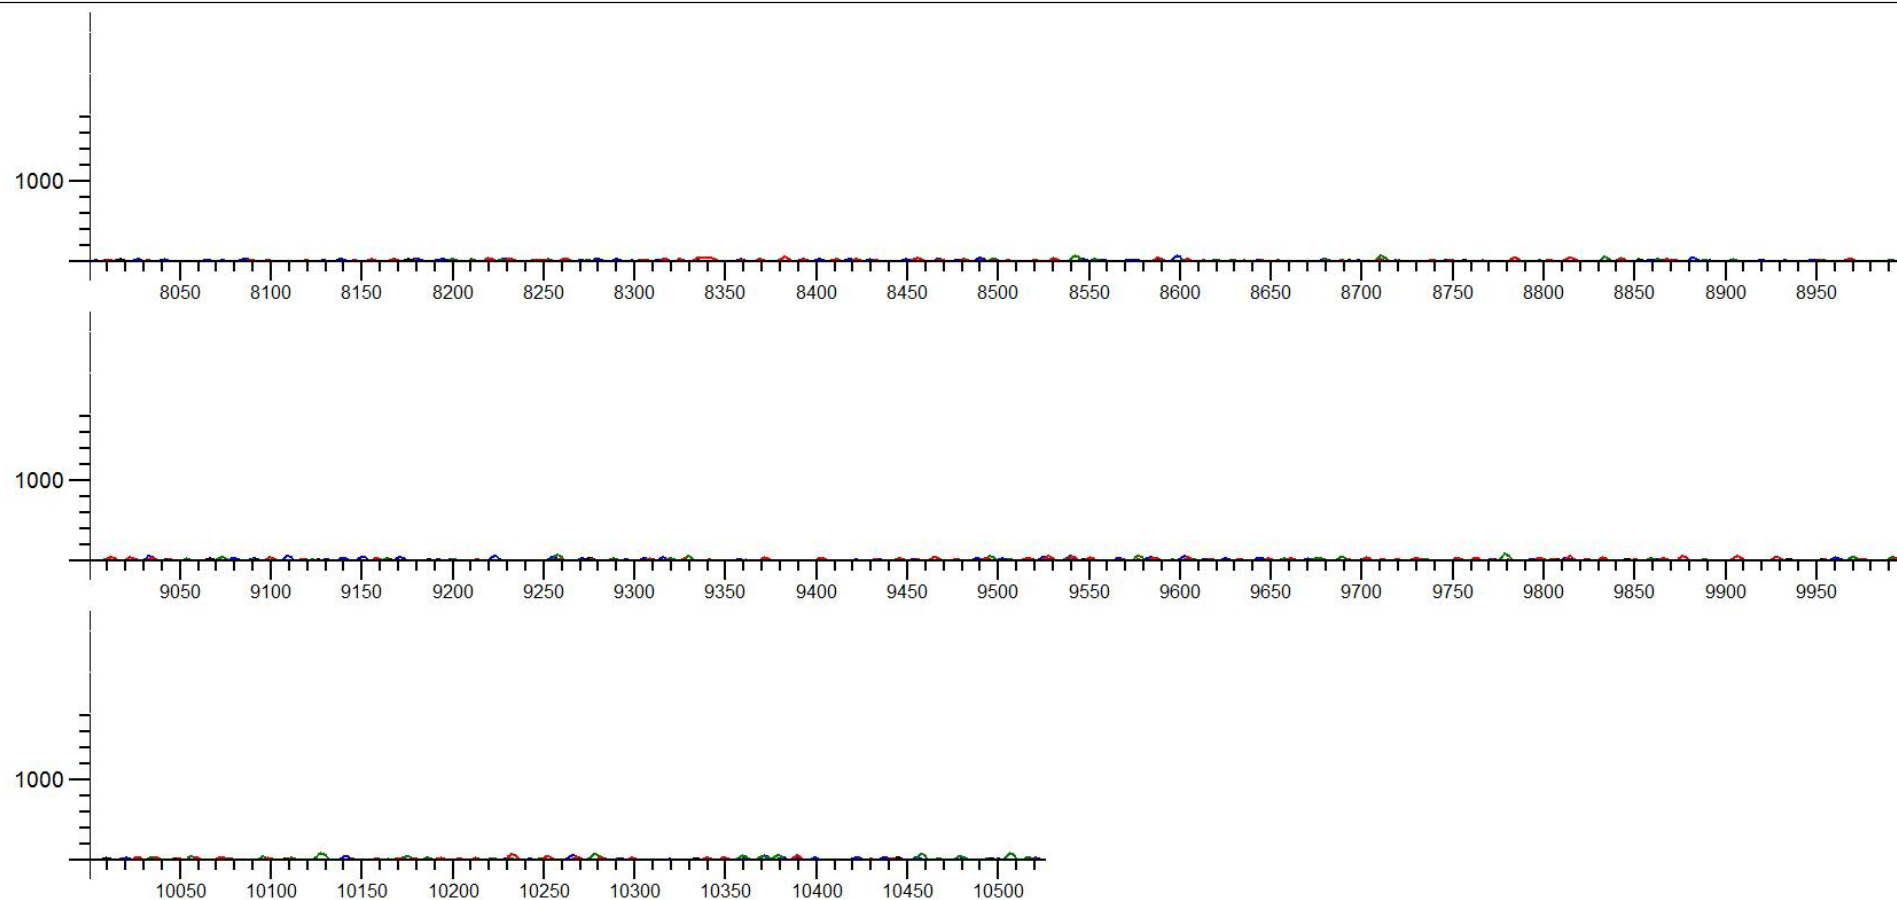

Supplement: raw_material.zip [file raw_material.zip]

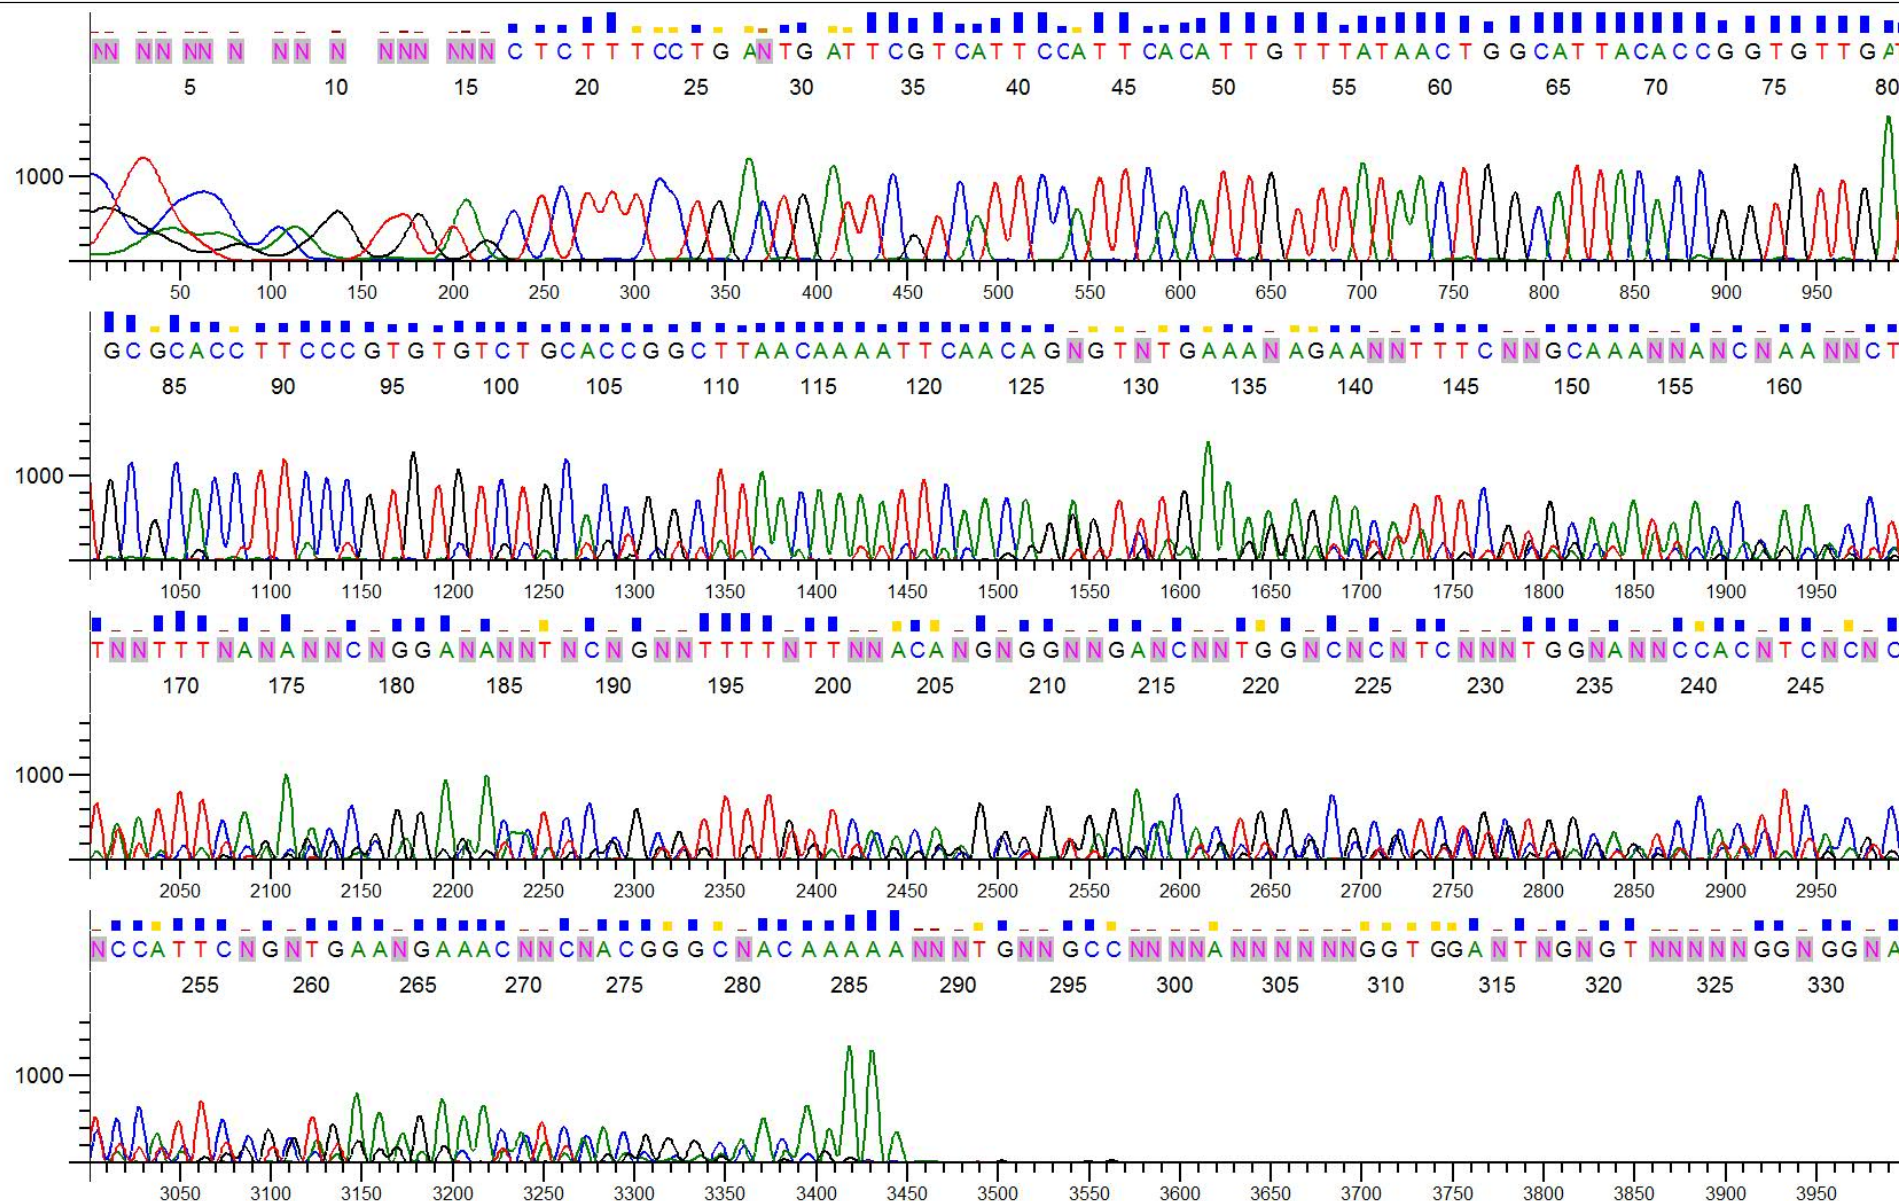

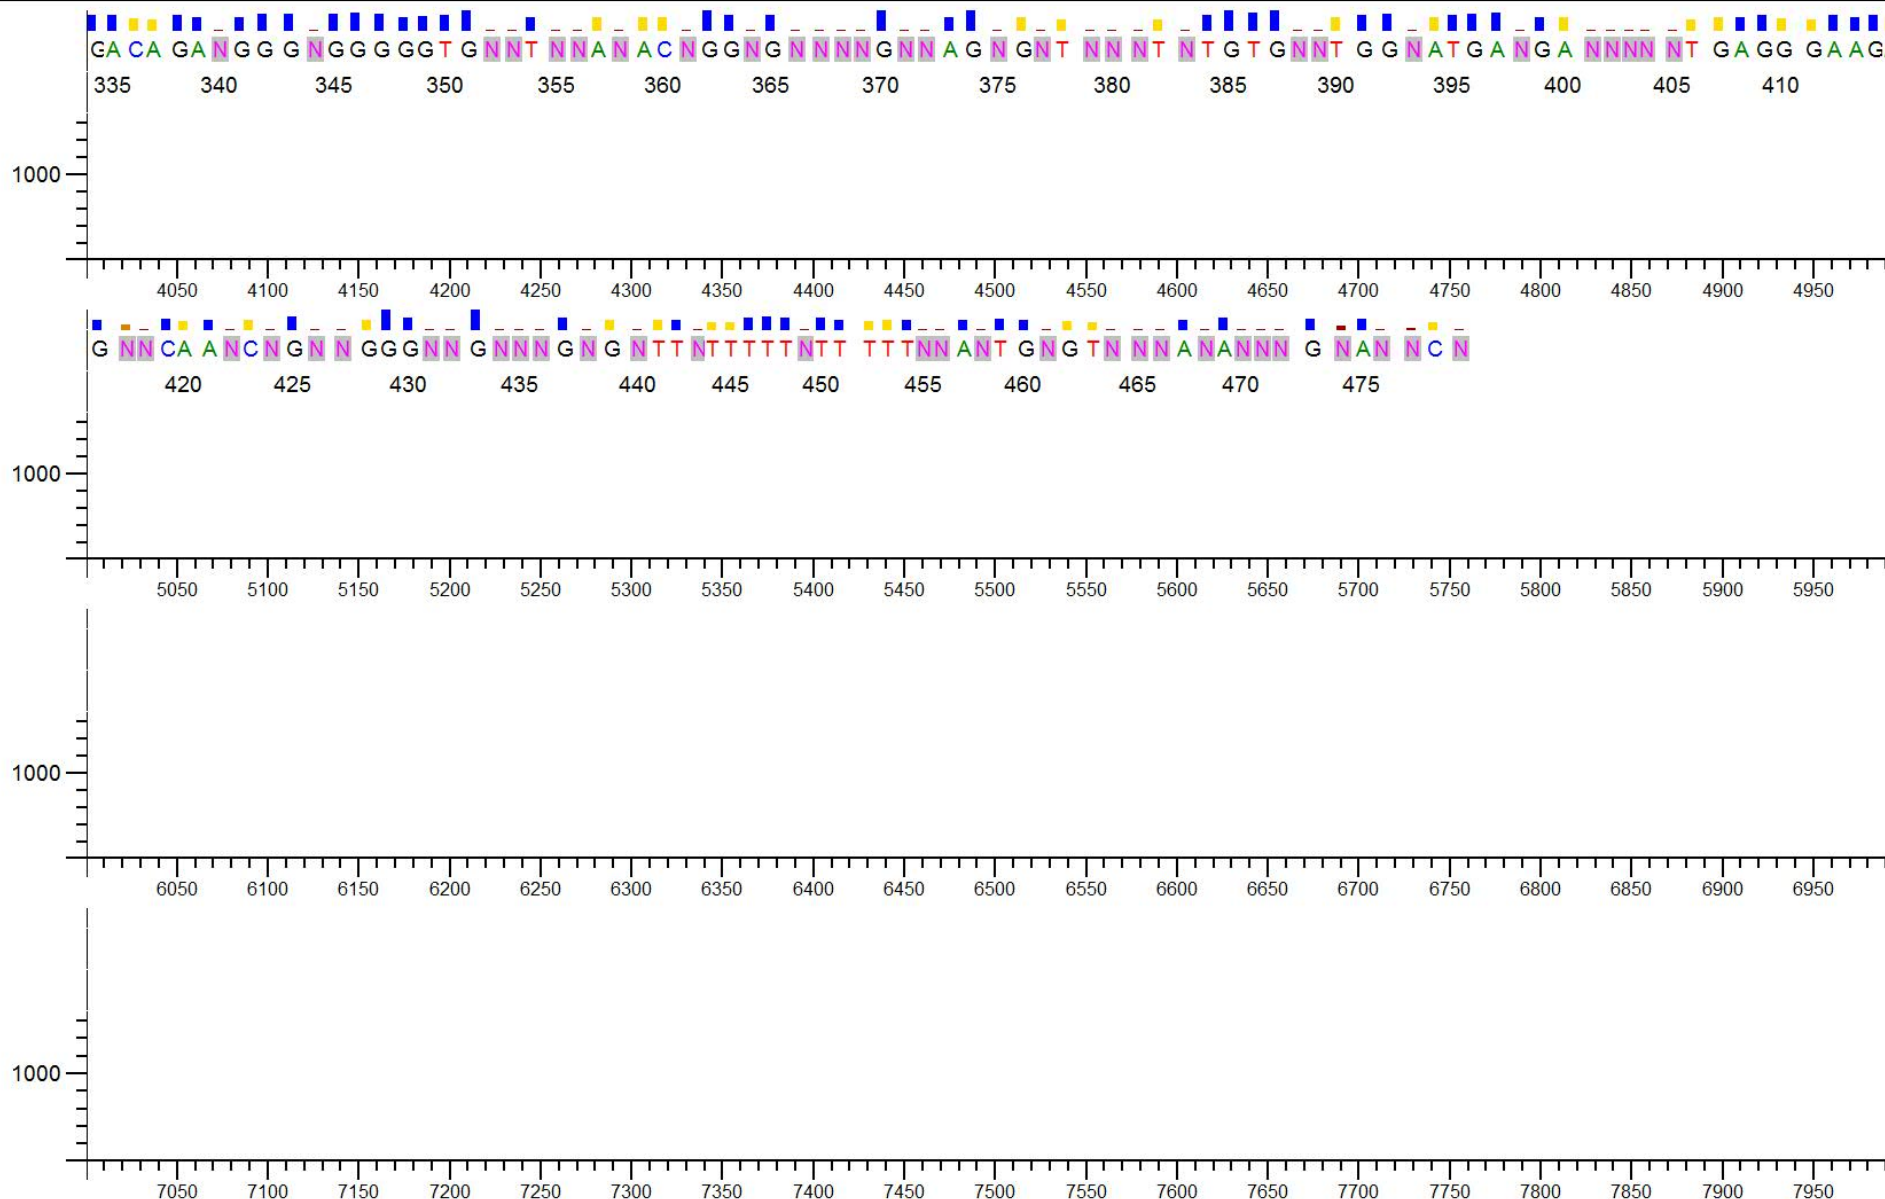

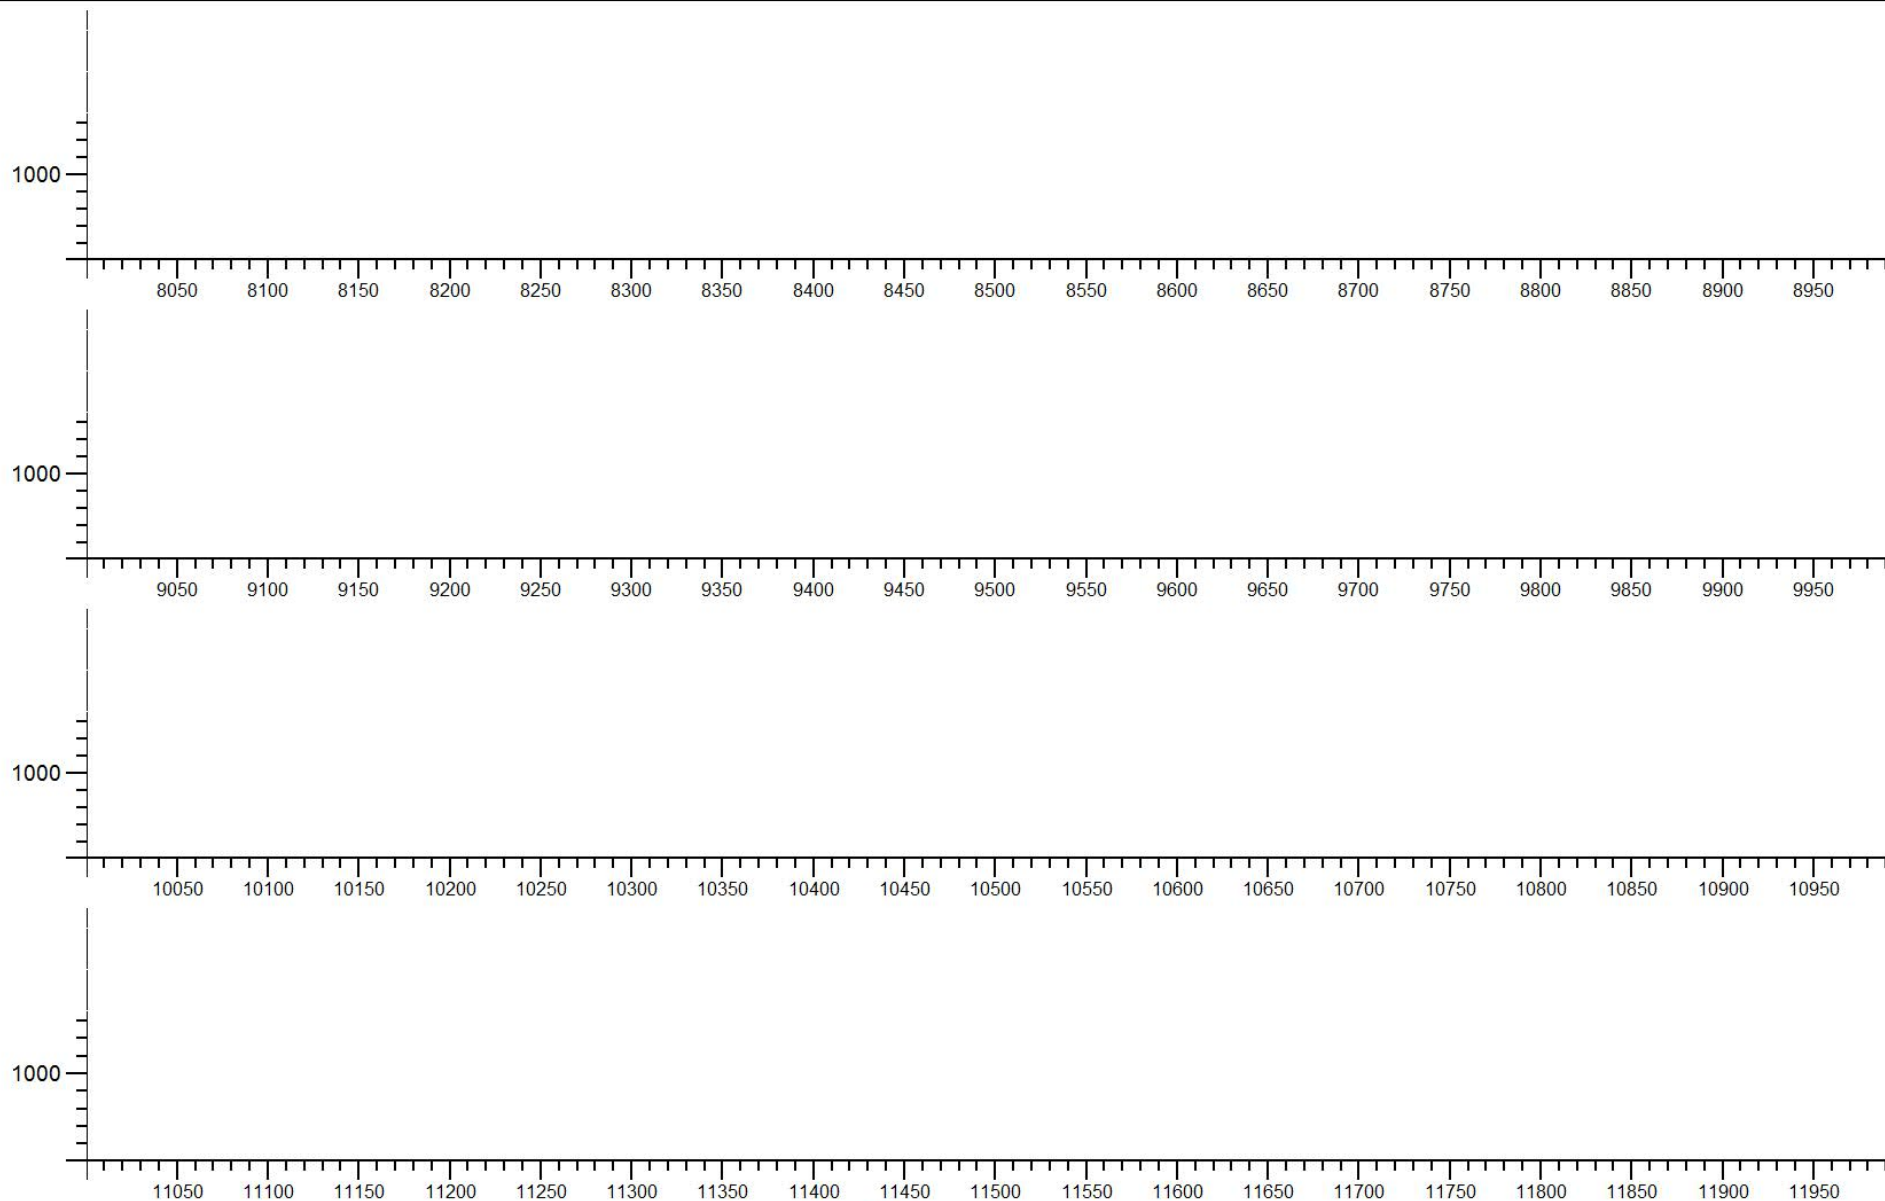



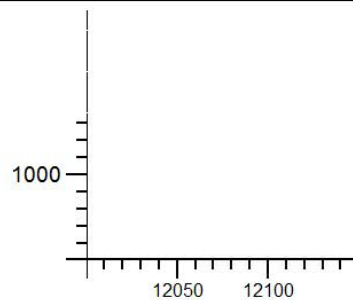

Supplement: raw_material.zip [file raw_material.zip]

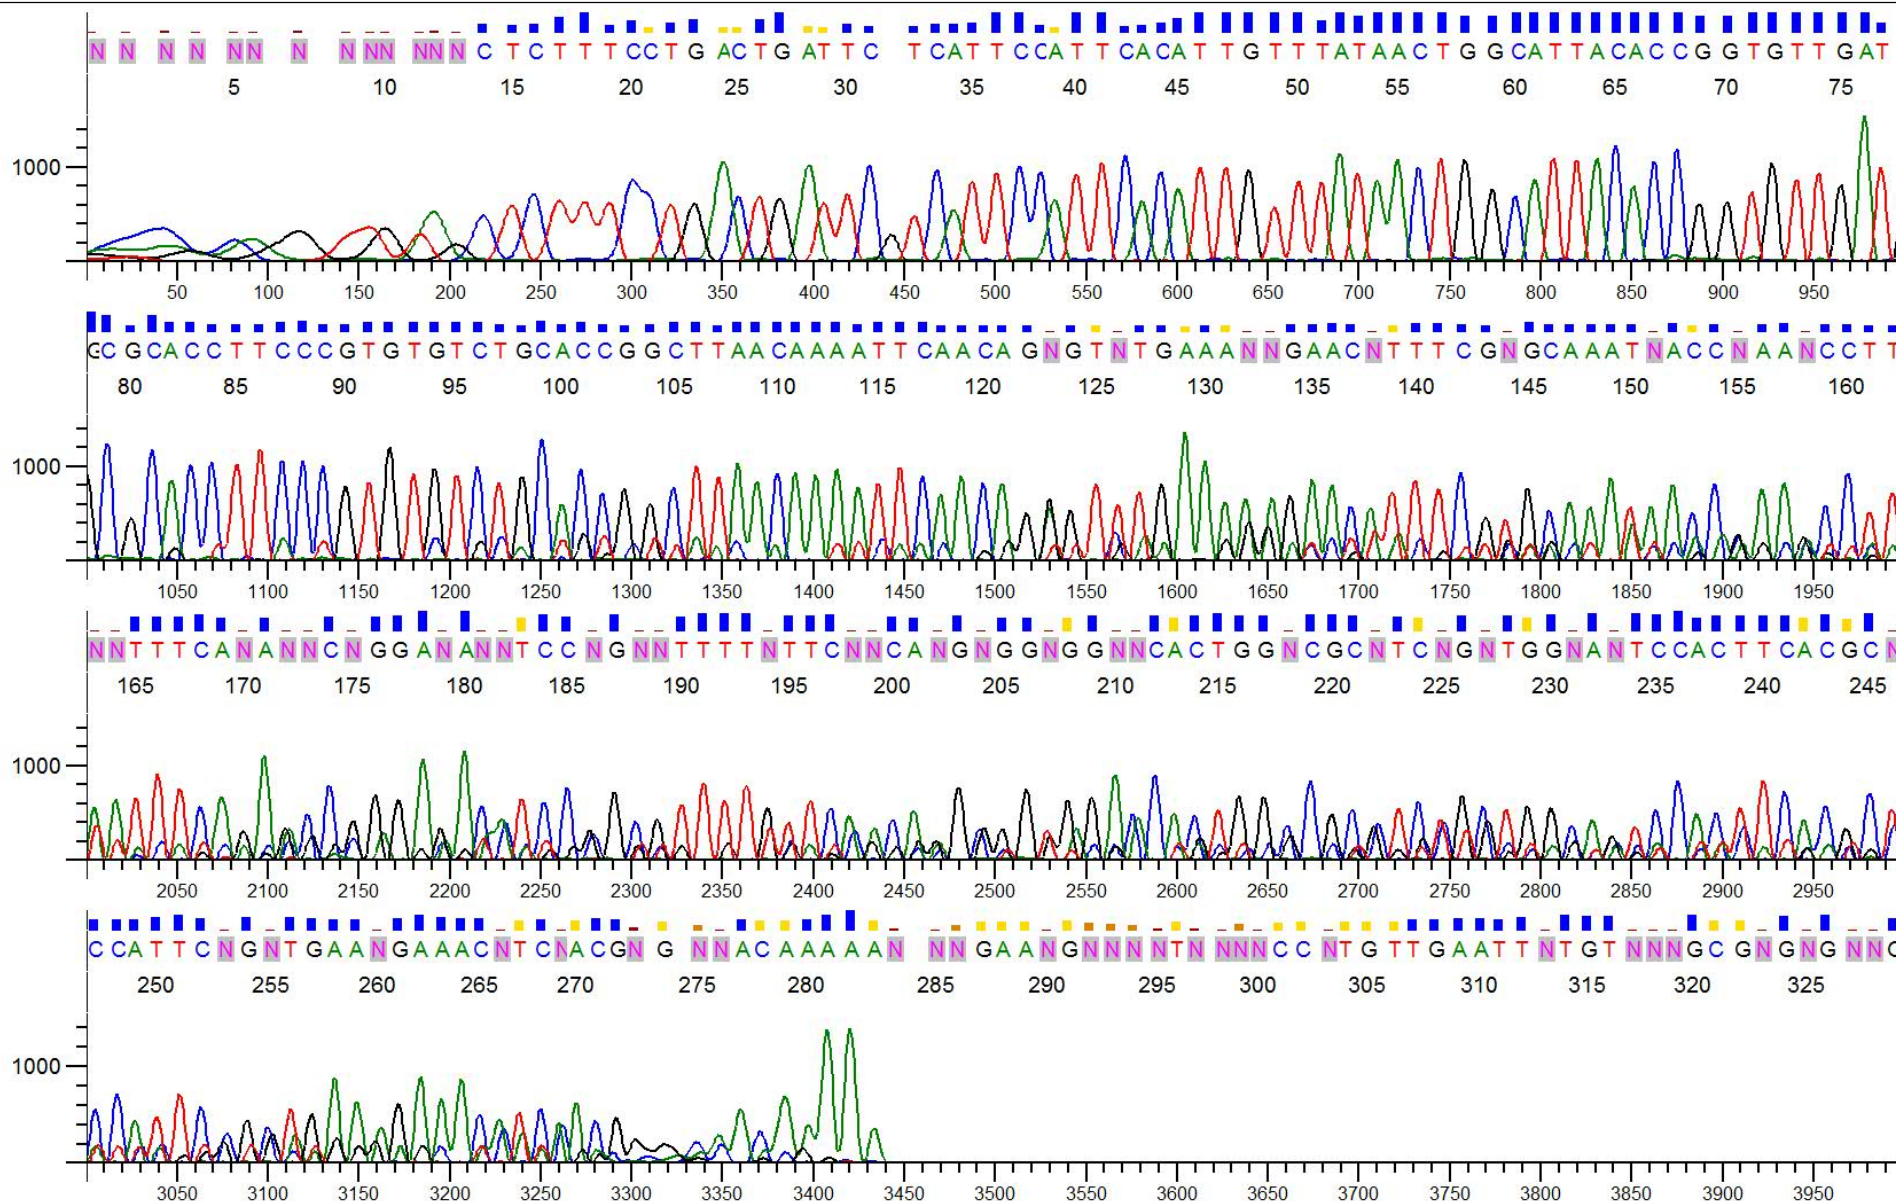

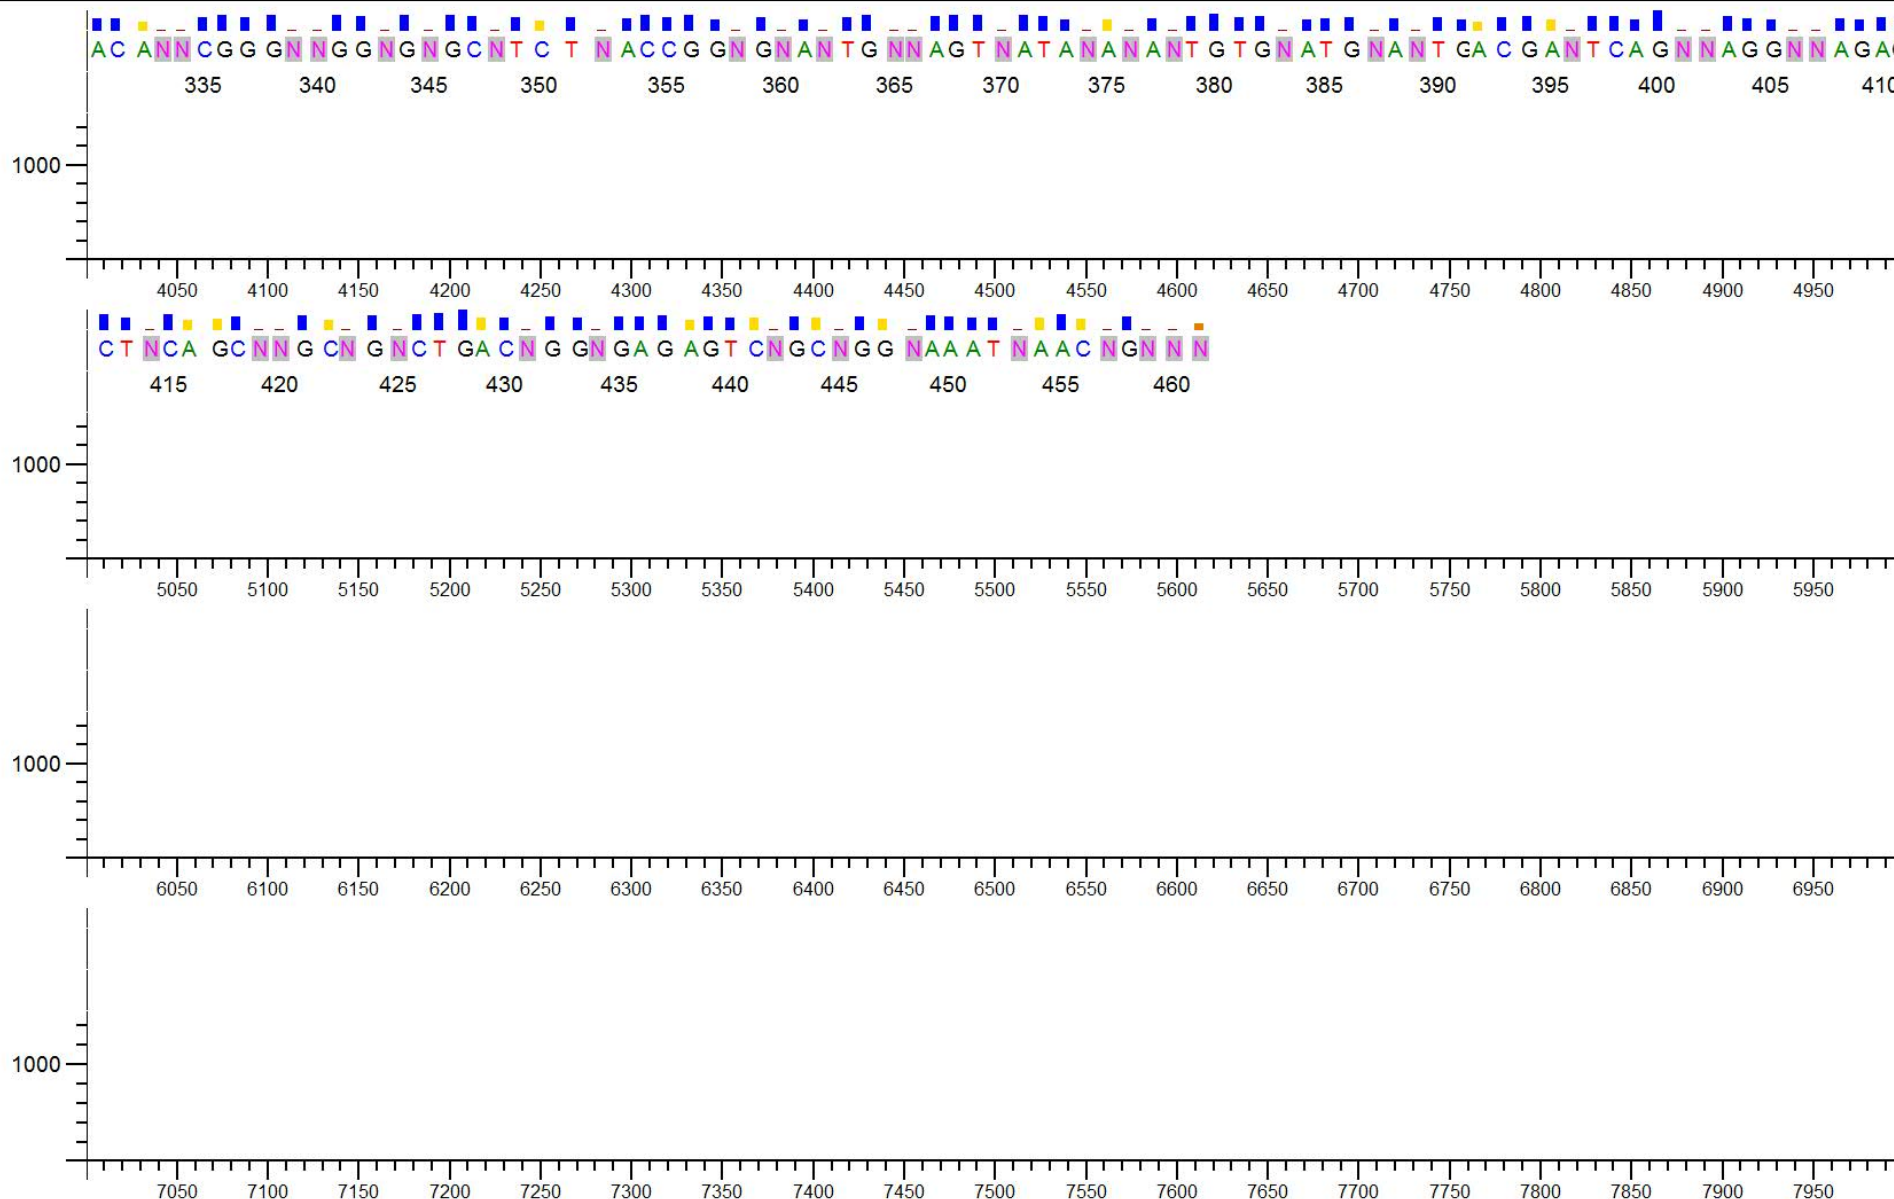

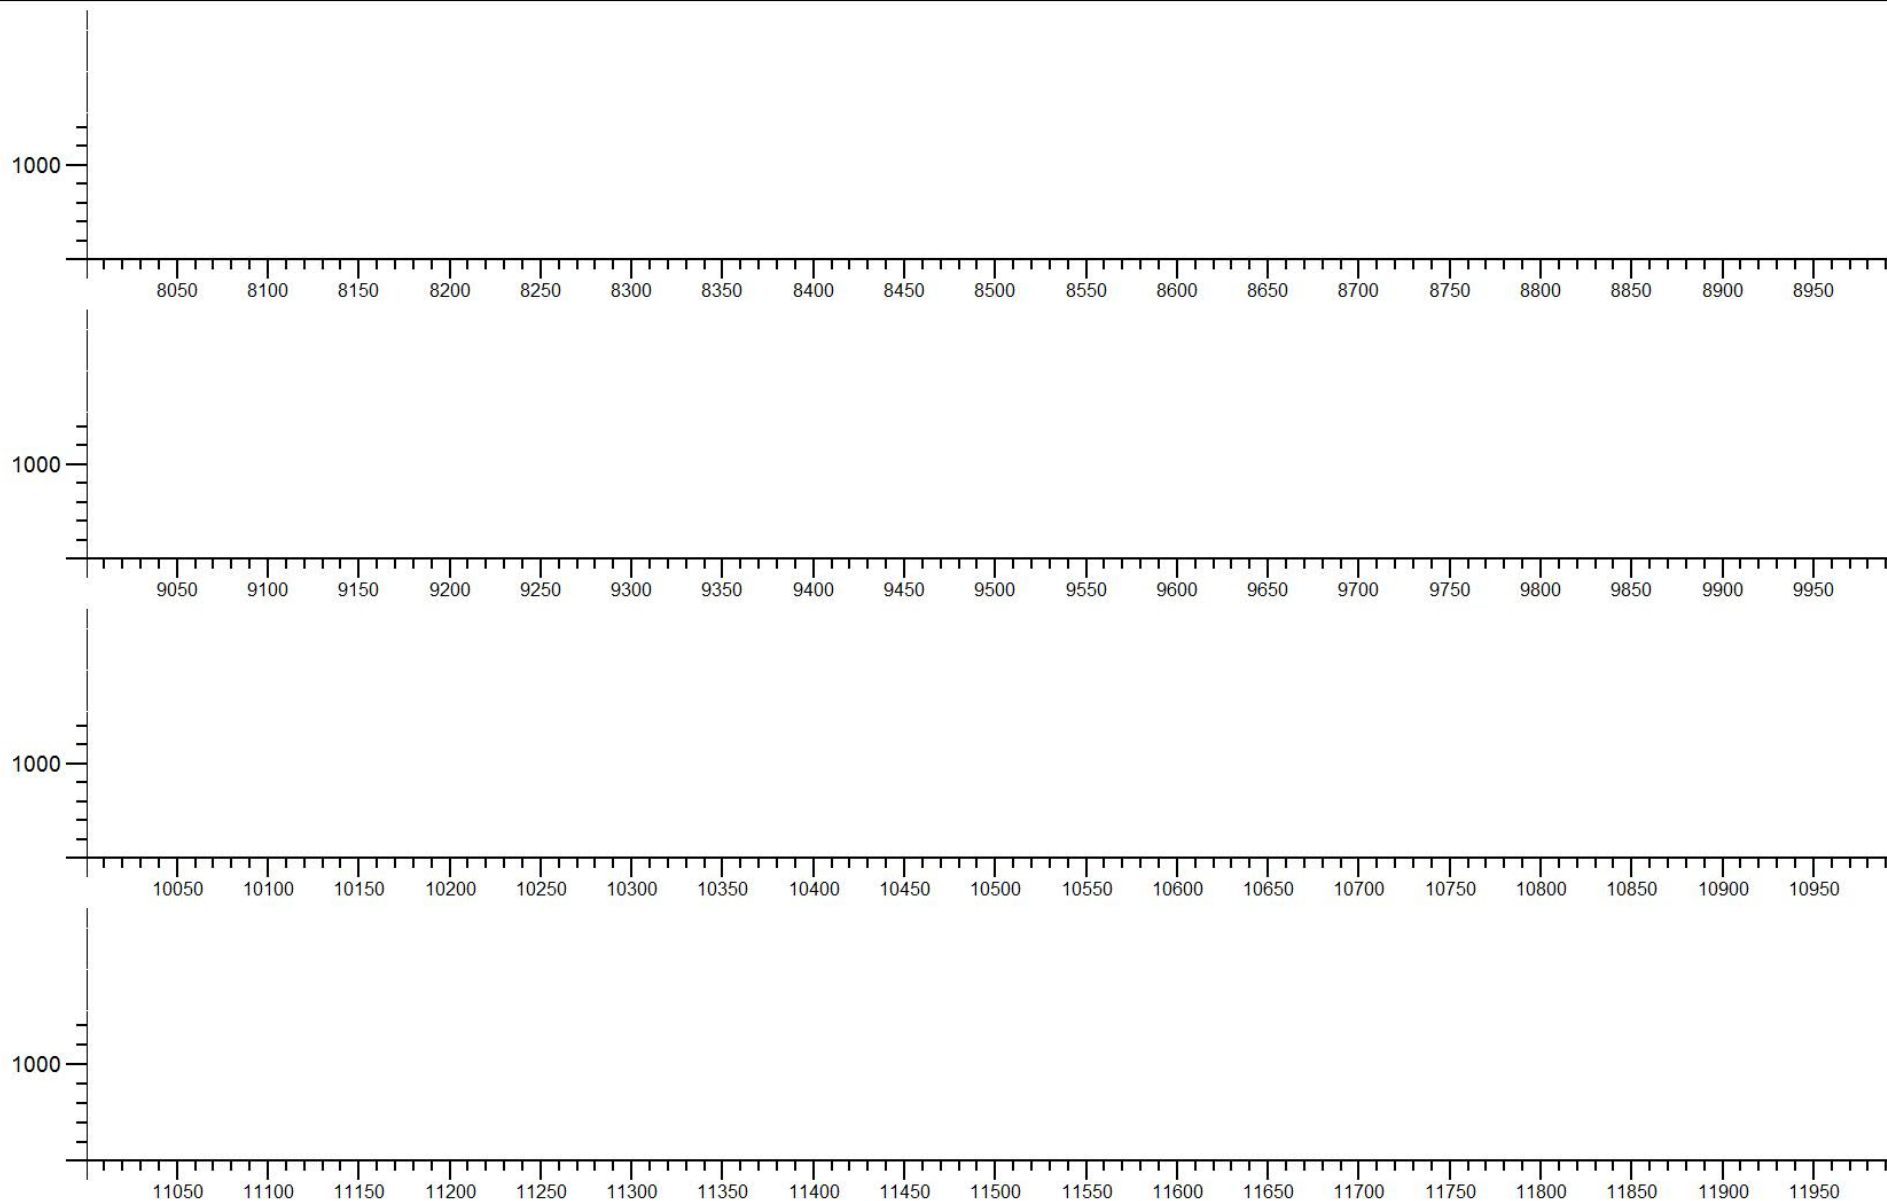

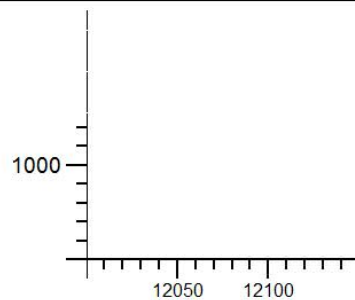

Supplement: raw_material.zip [file raw_material.zip]

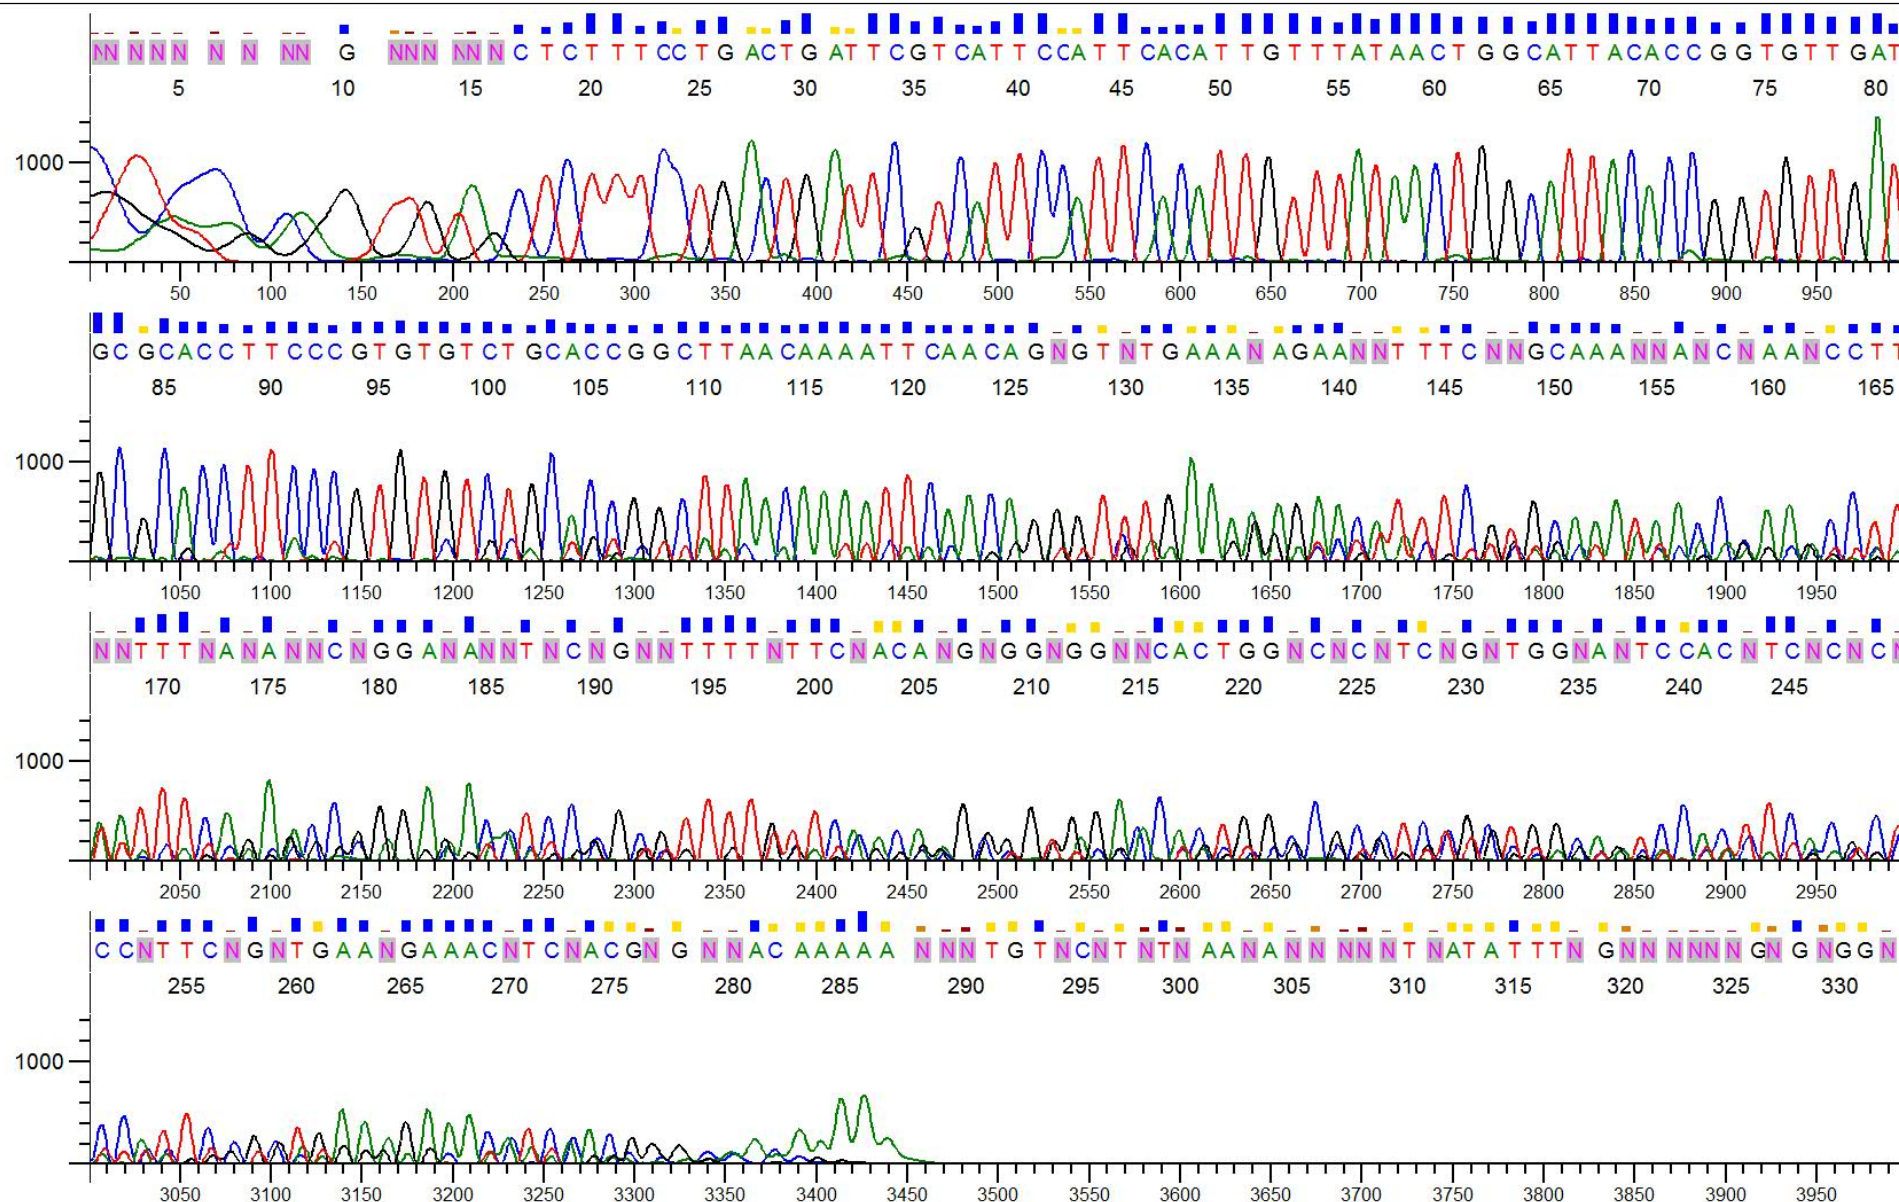

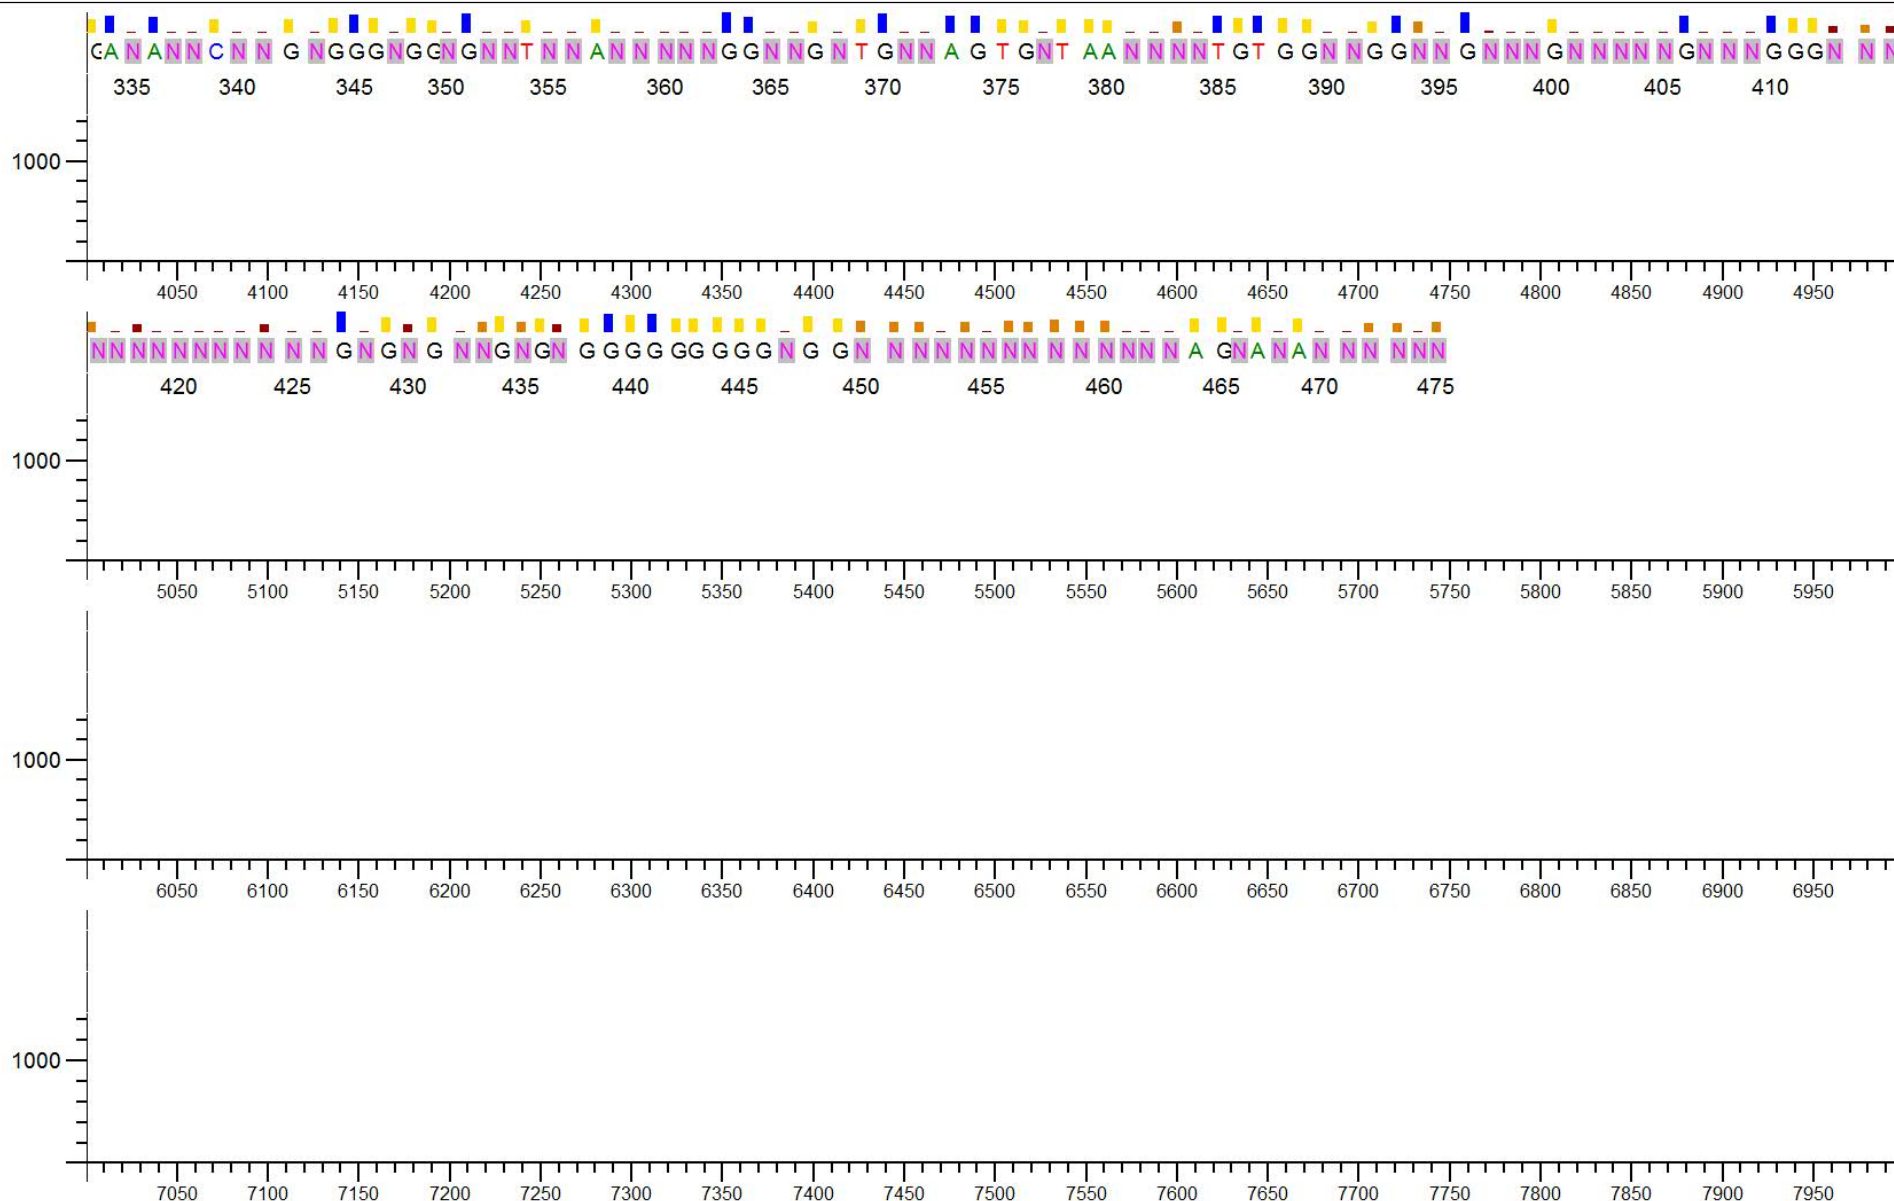

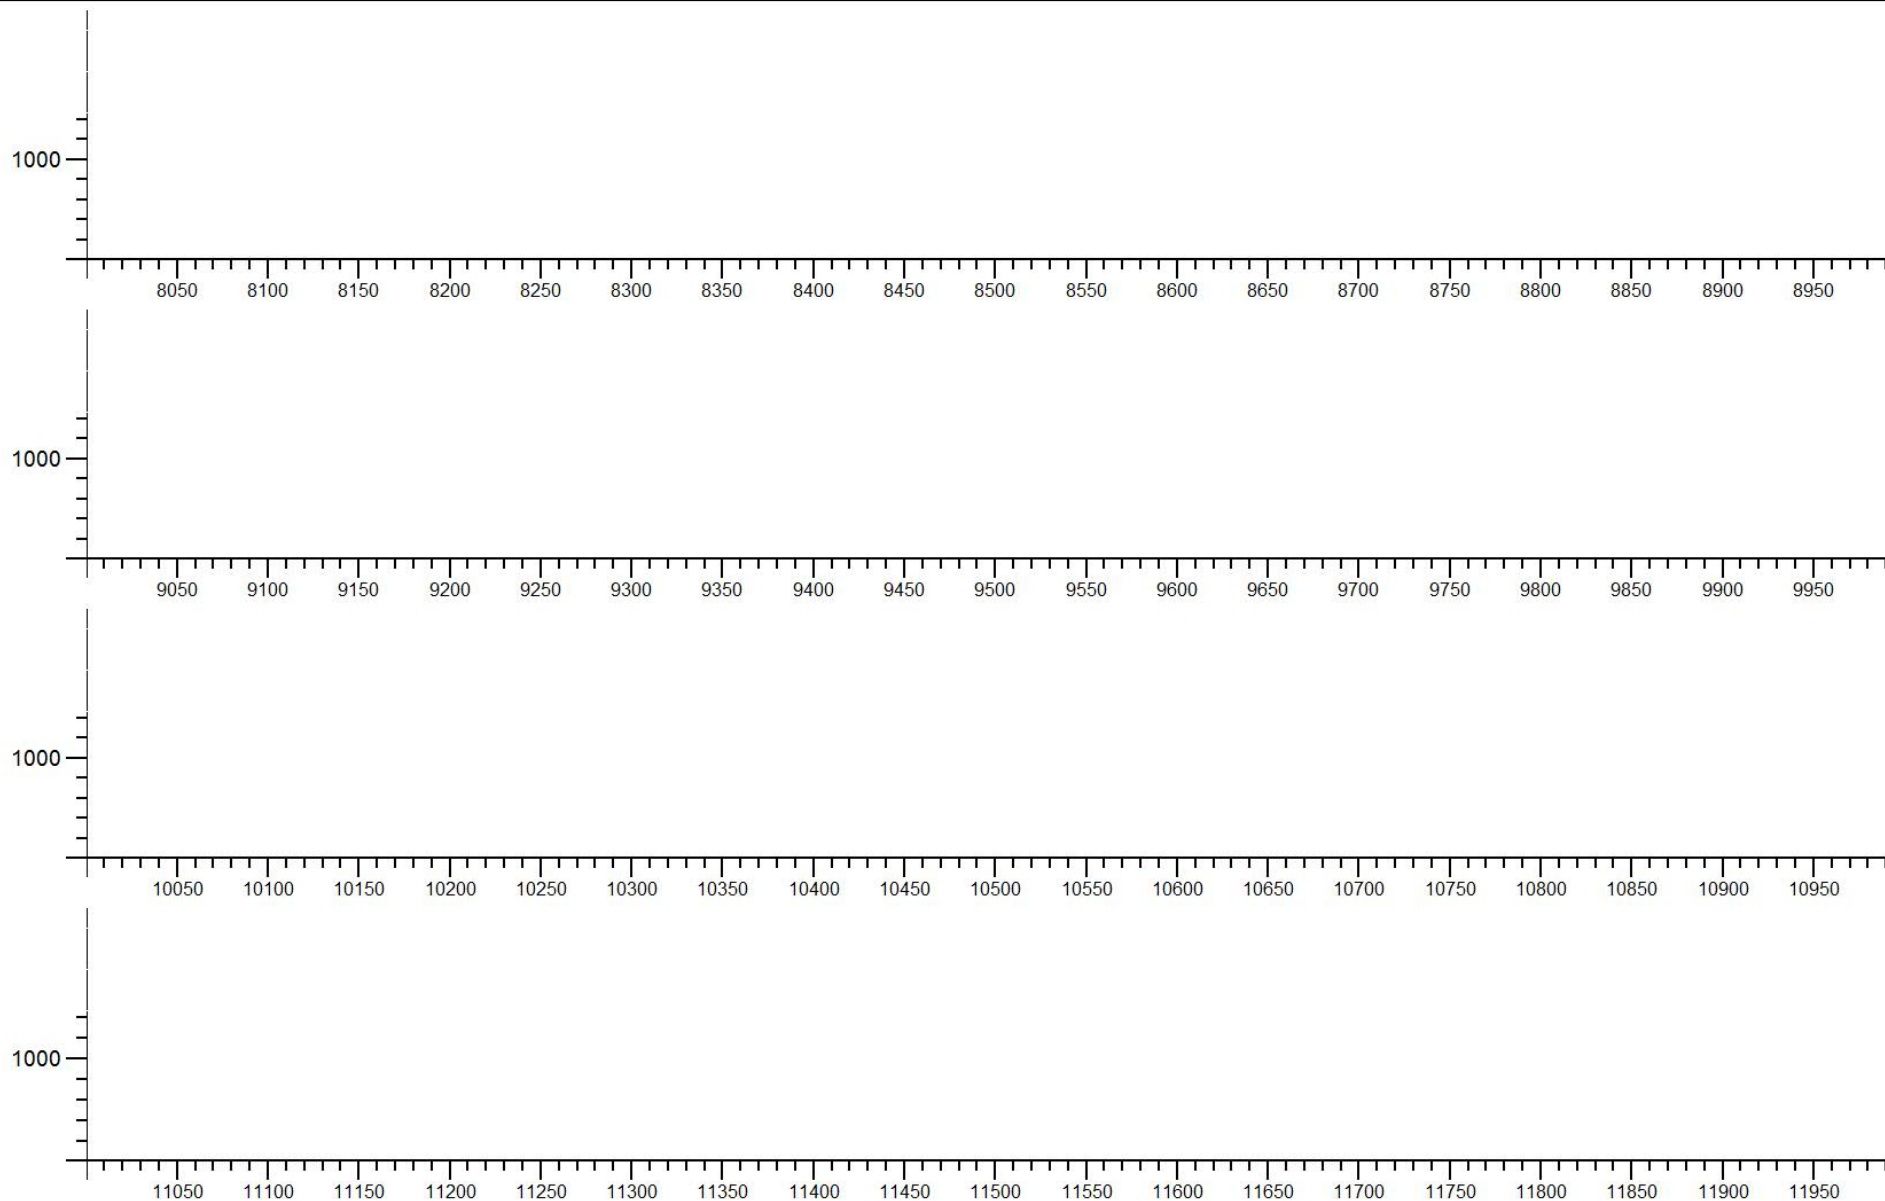

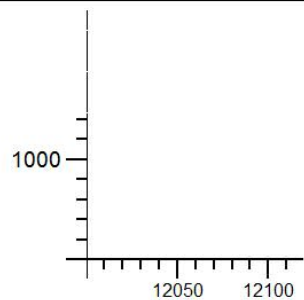

Supplement: raw_material.zip [file raw_material.zip]

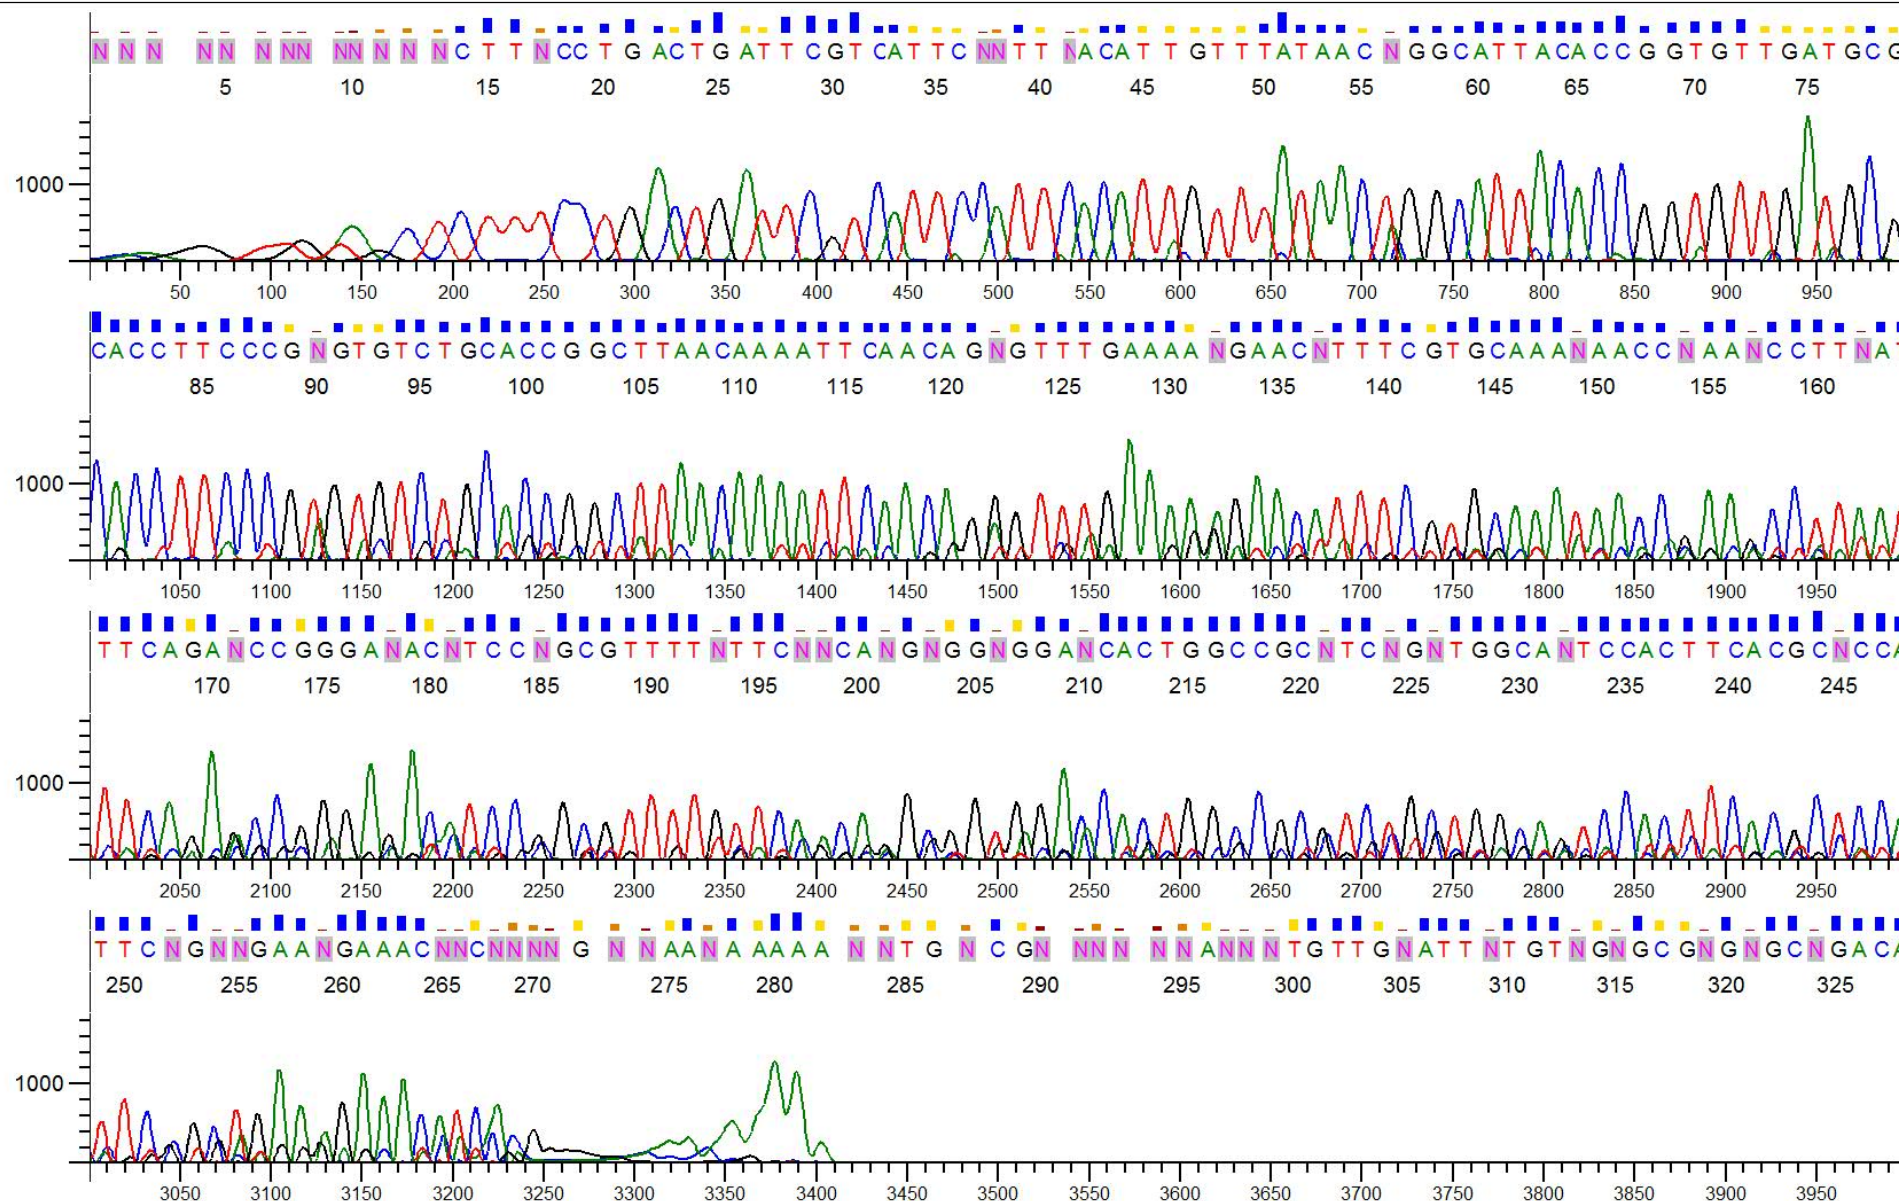

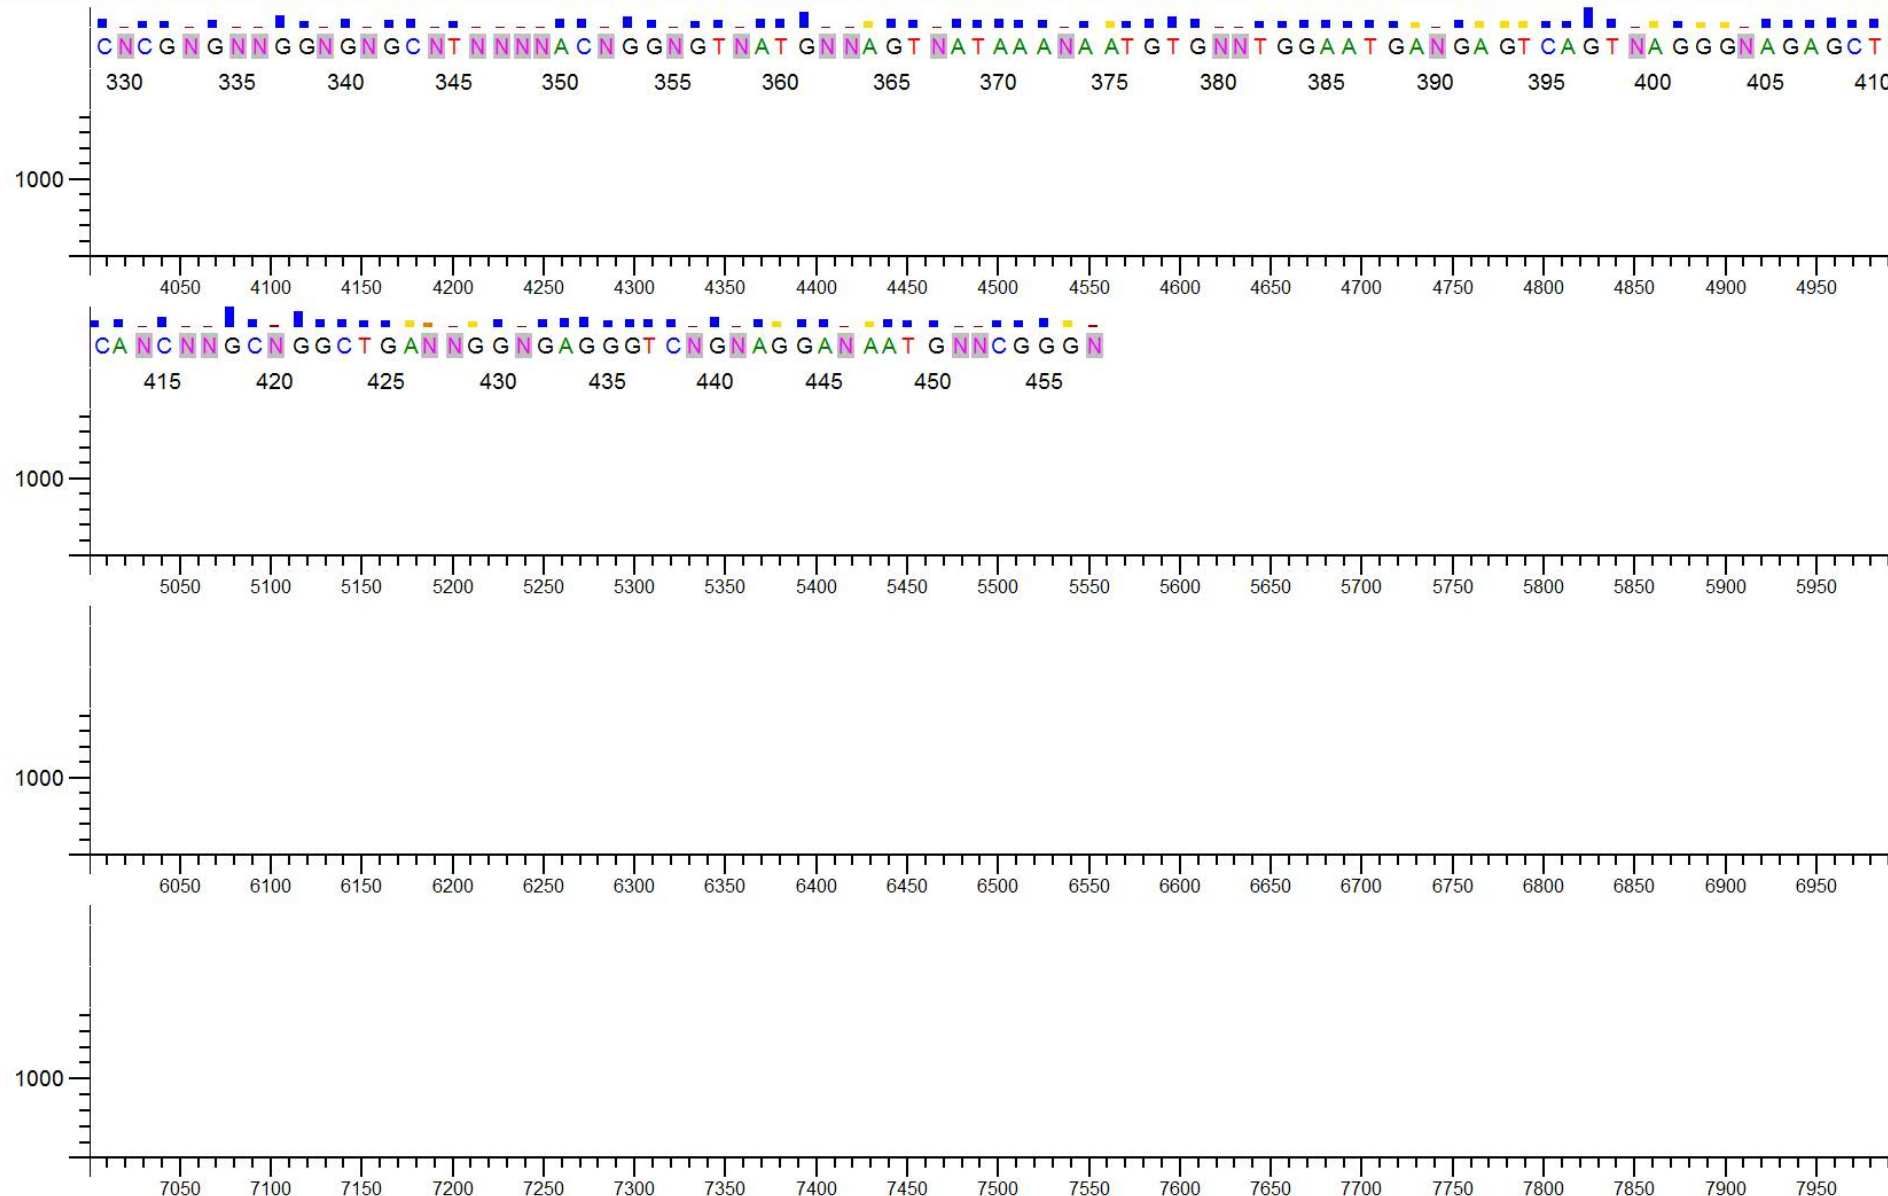

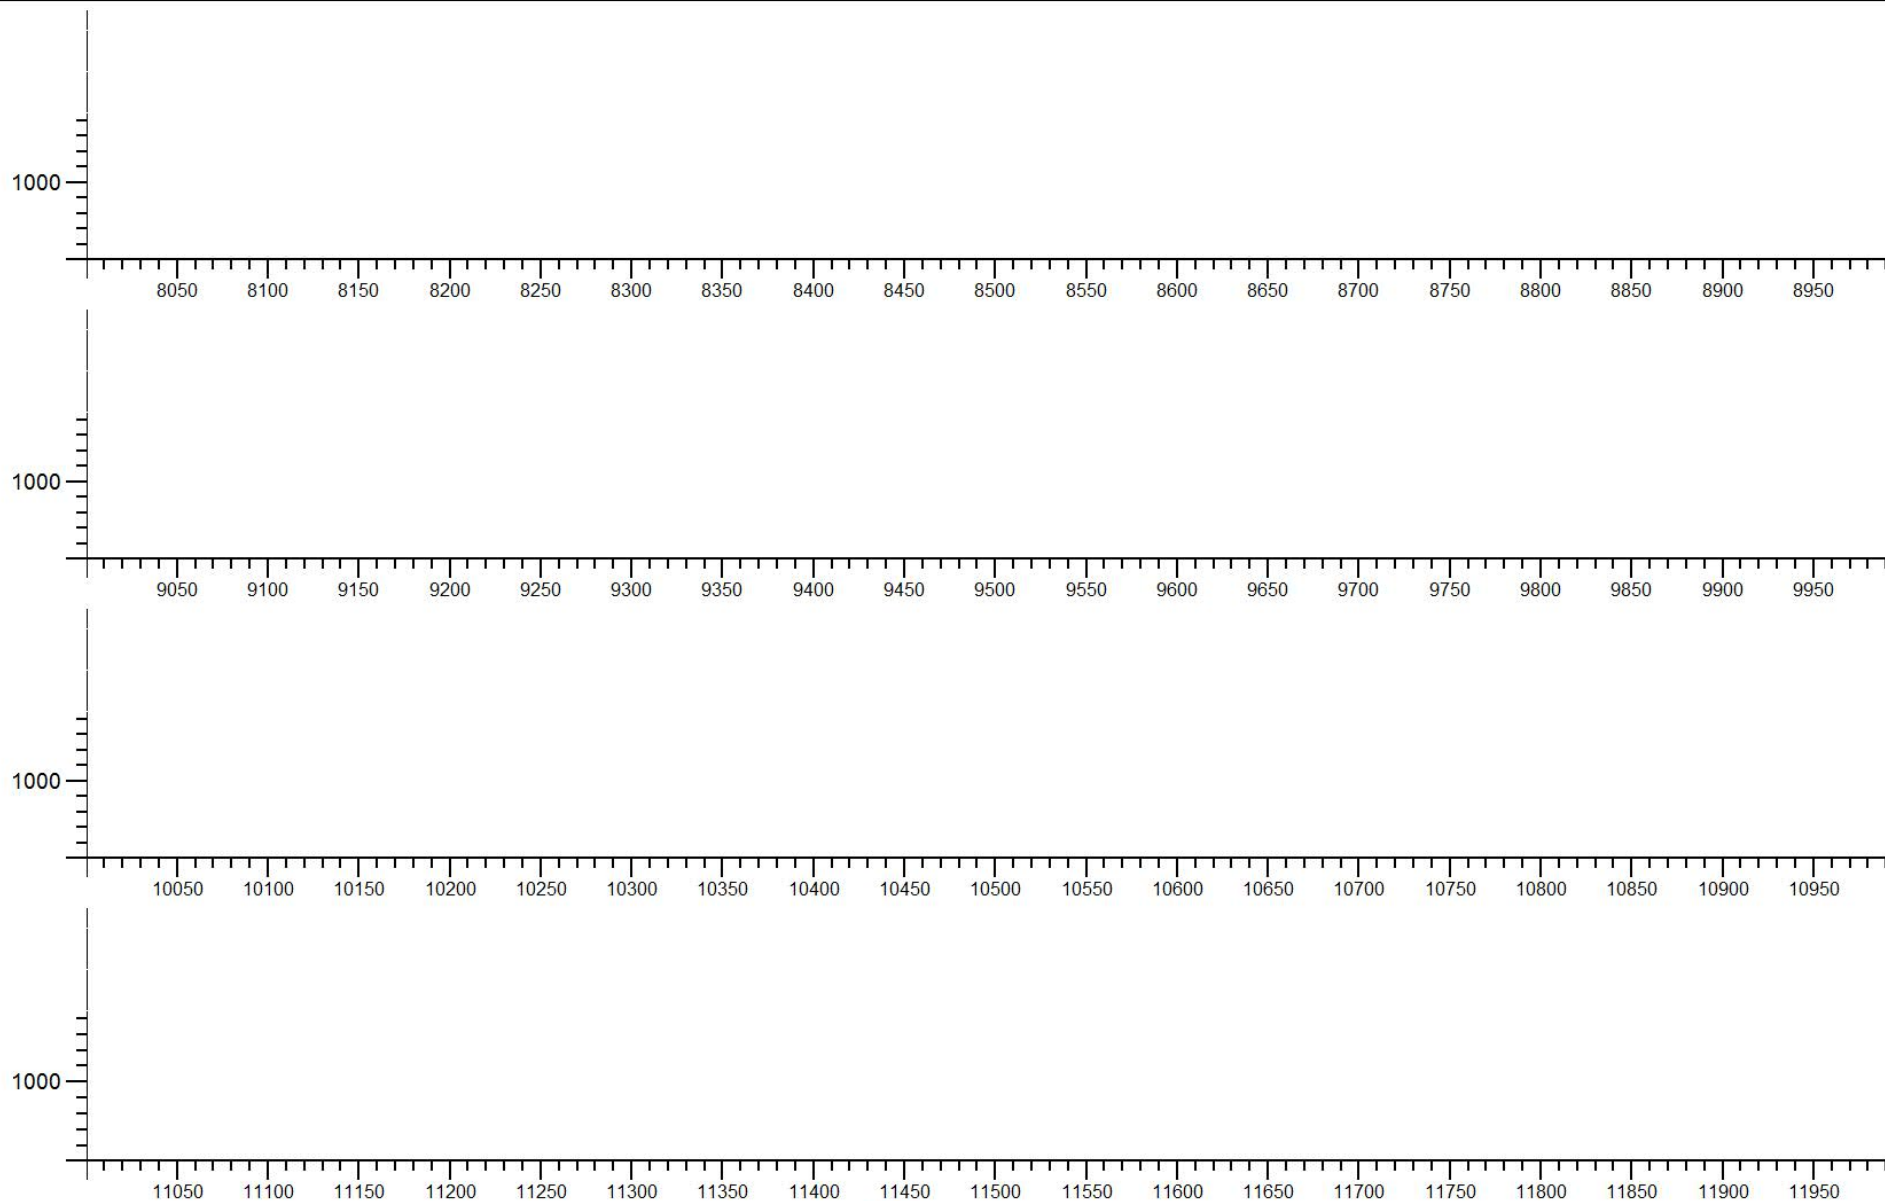



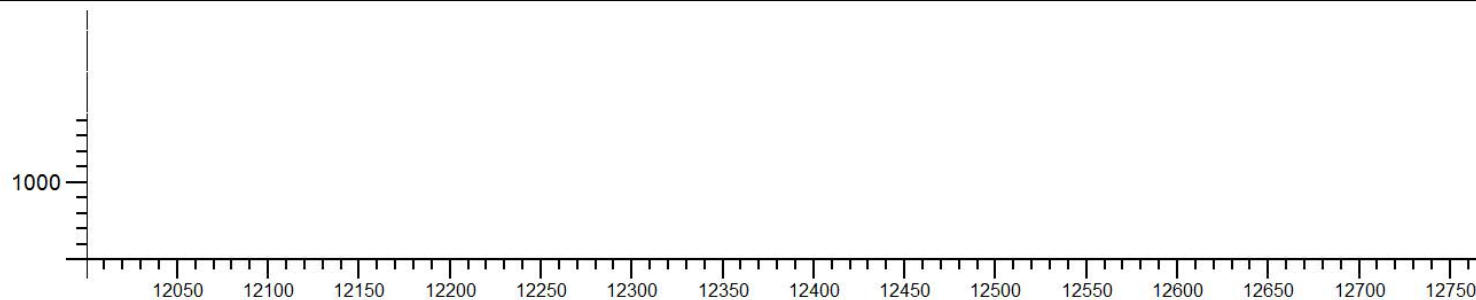

Supplement: raw_material.zip [file raw_material.zip]

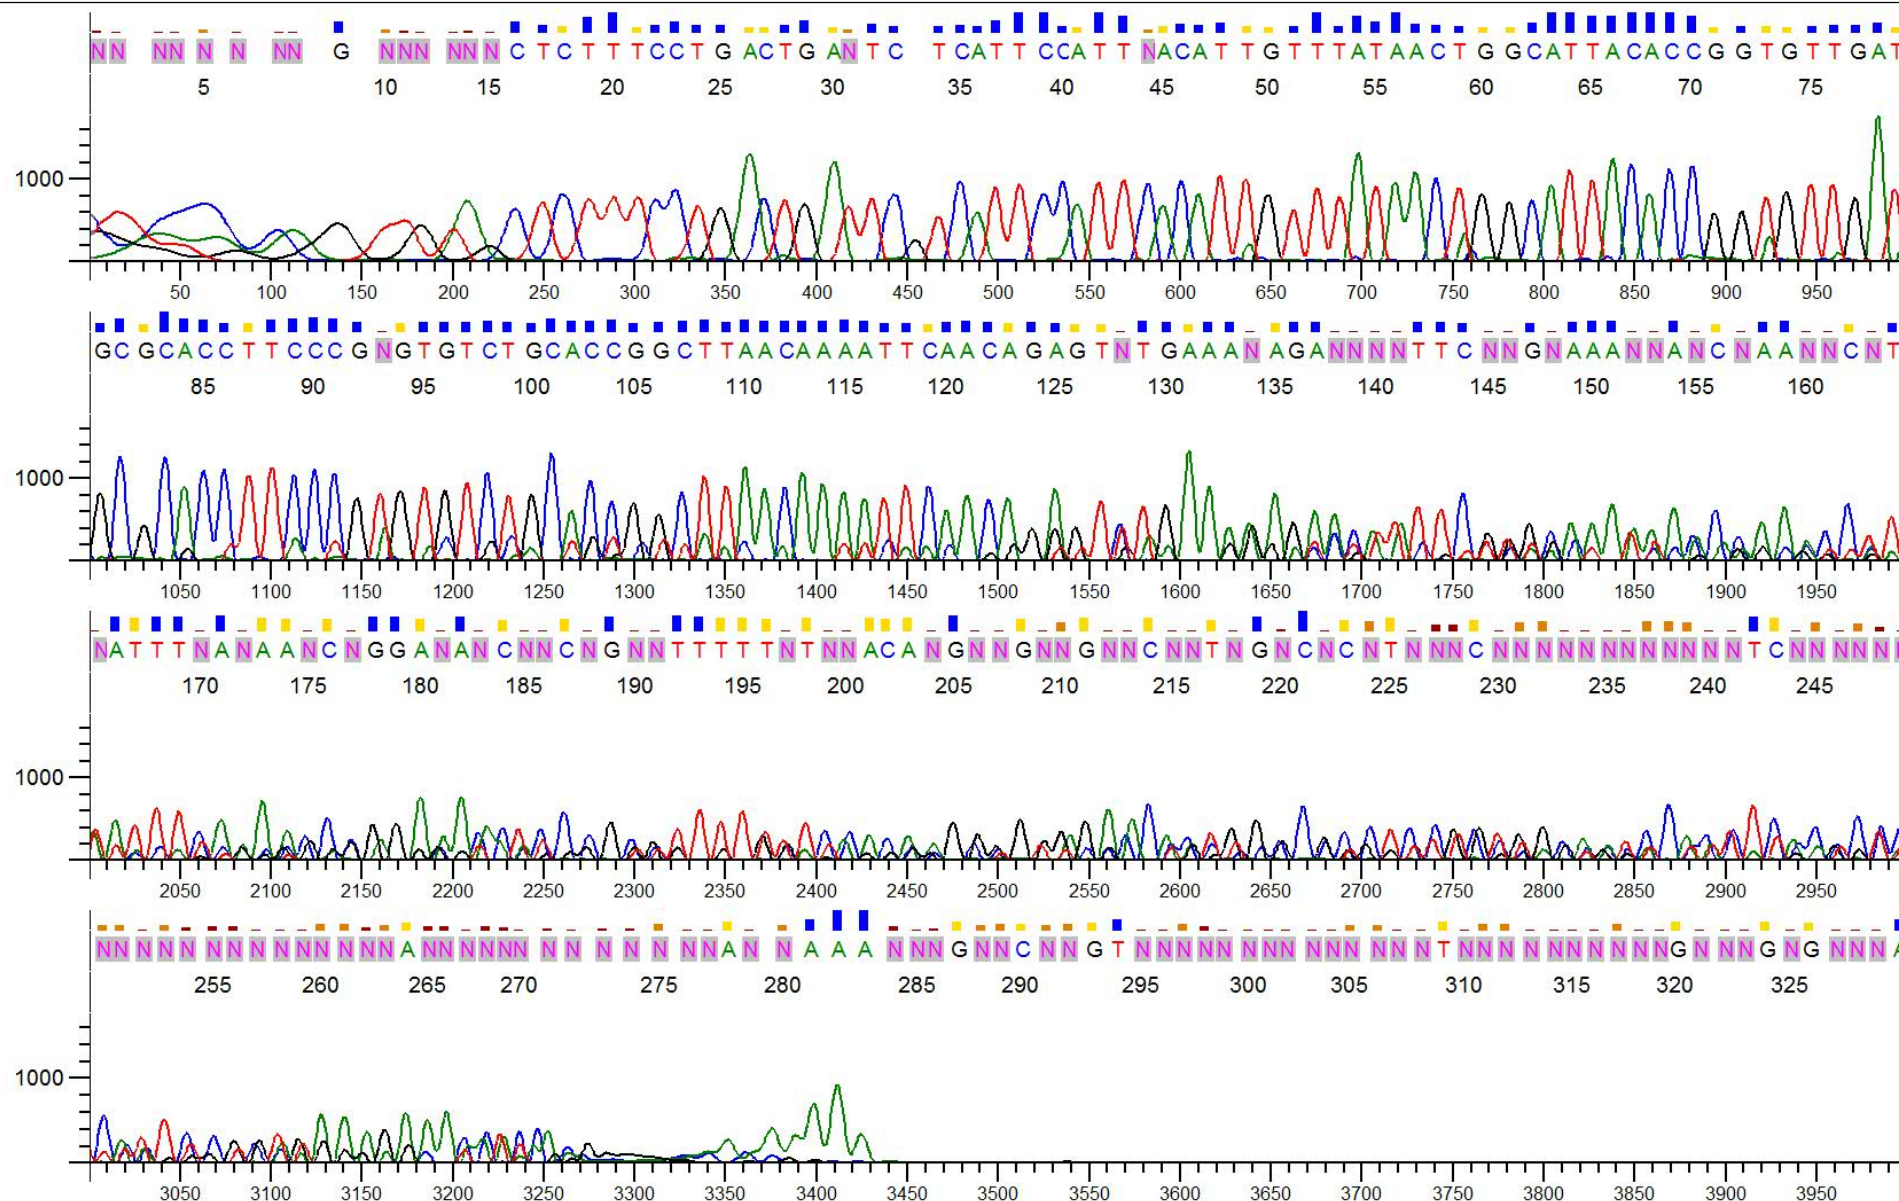

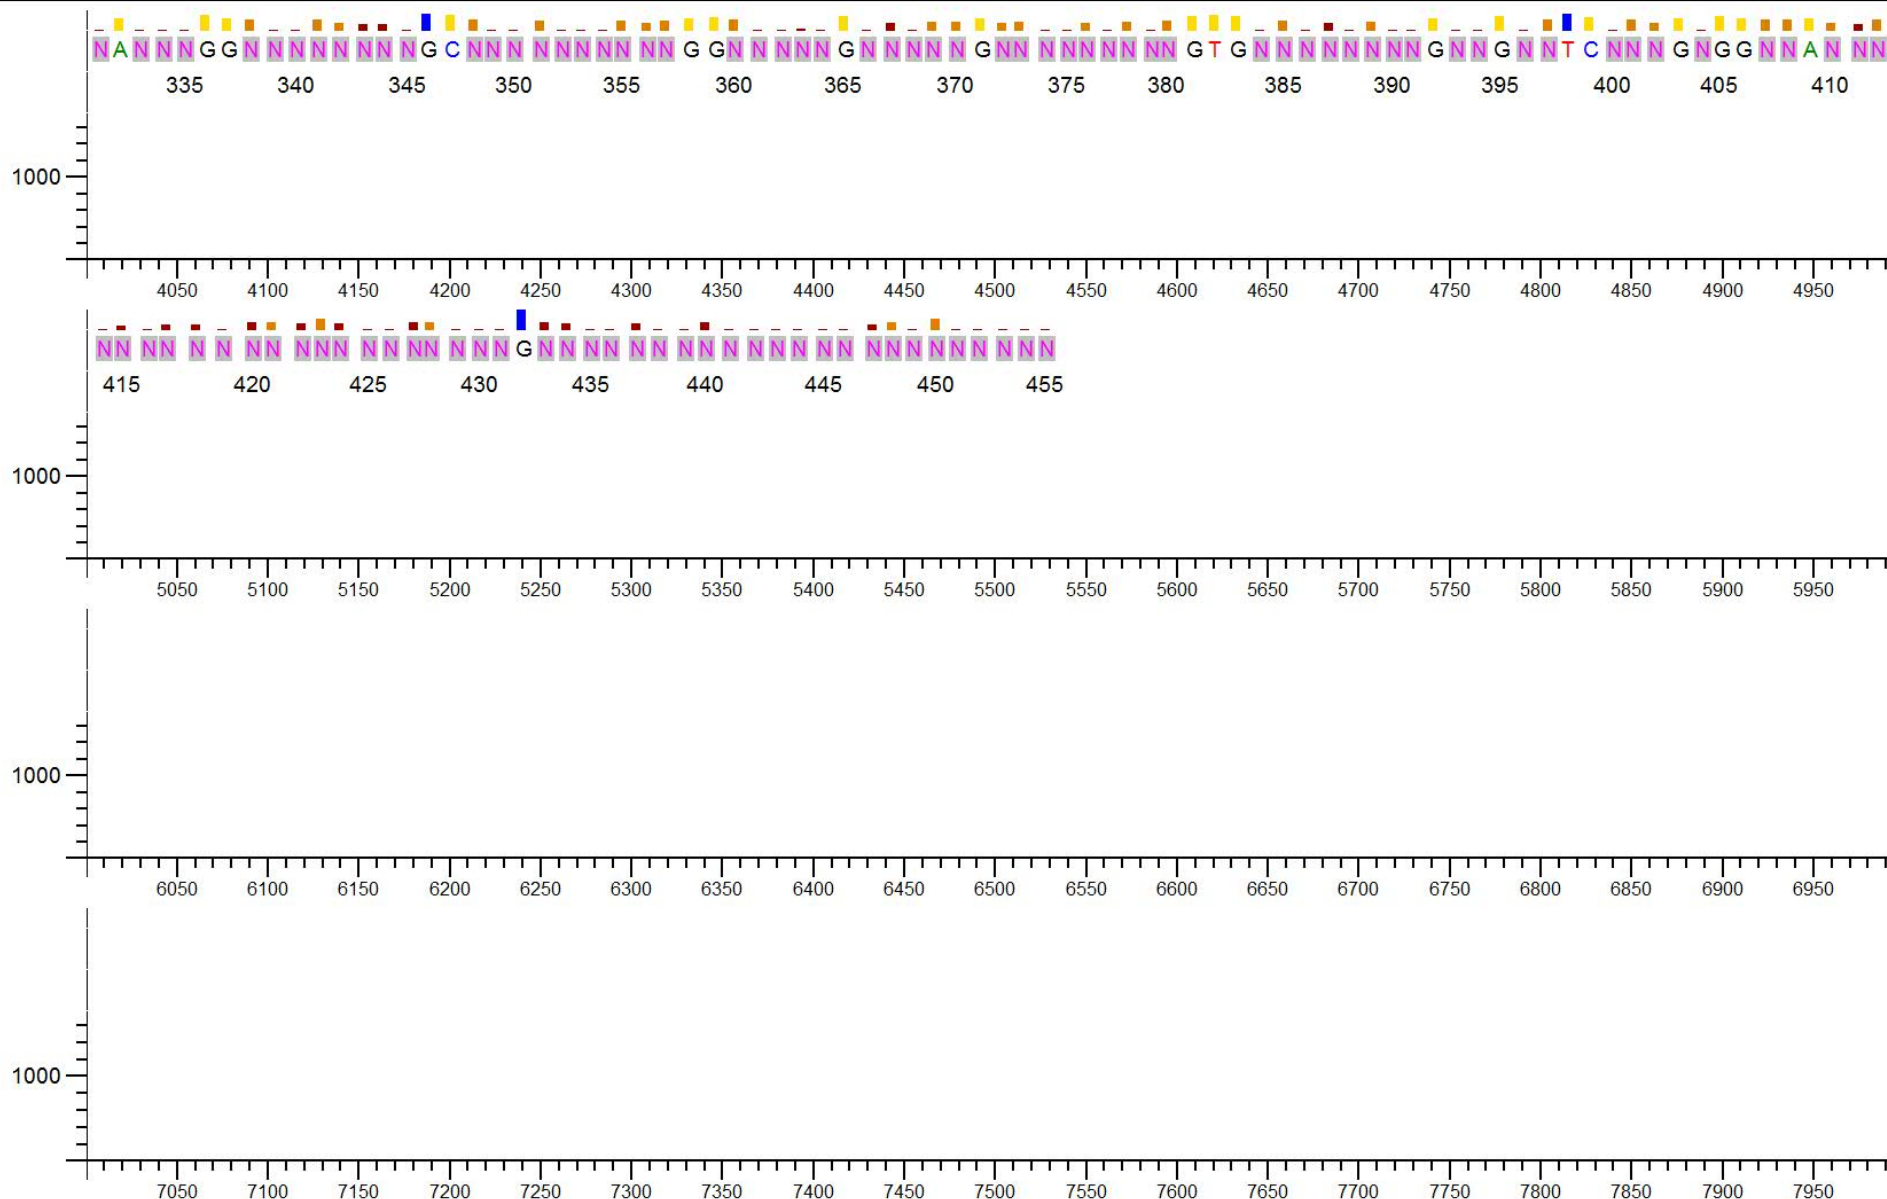

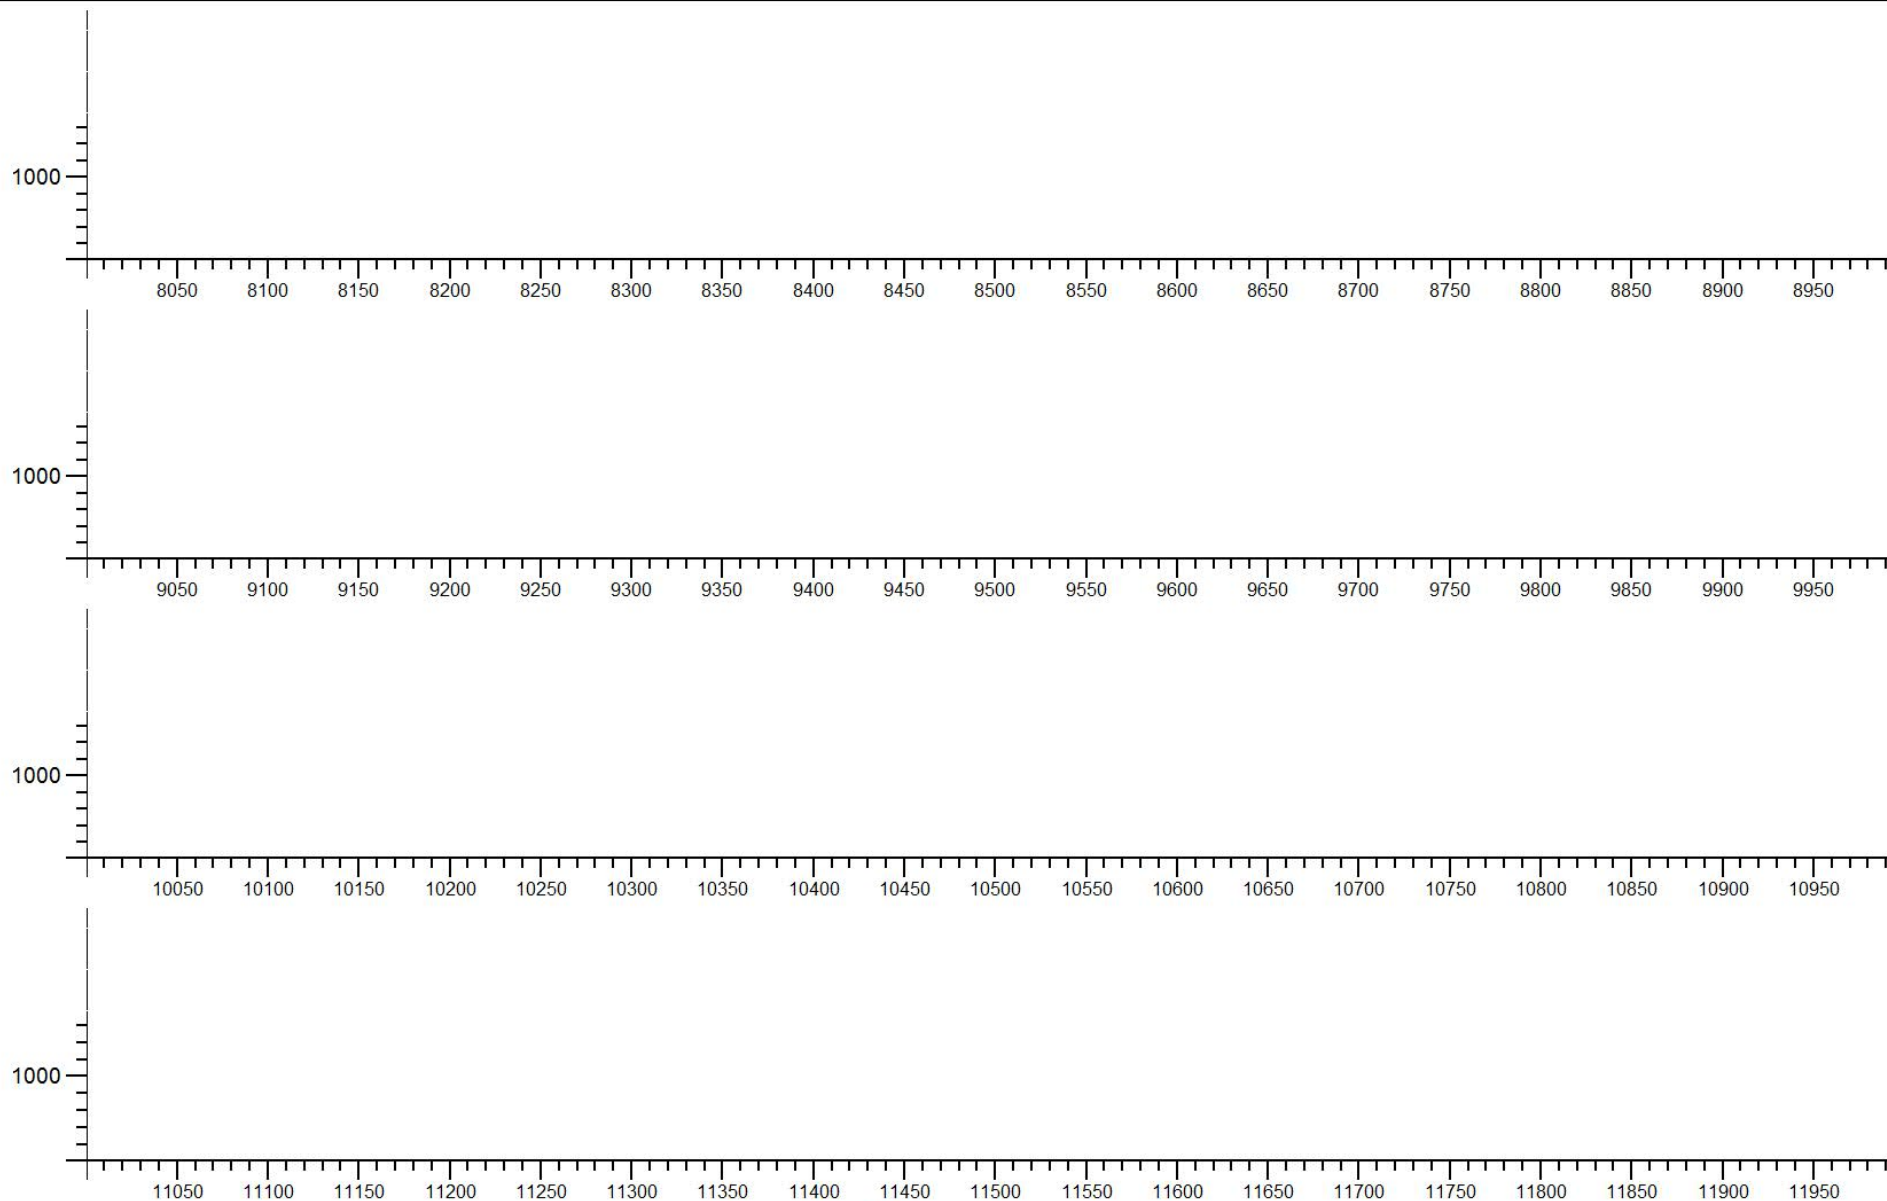

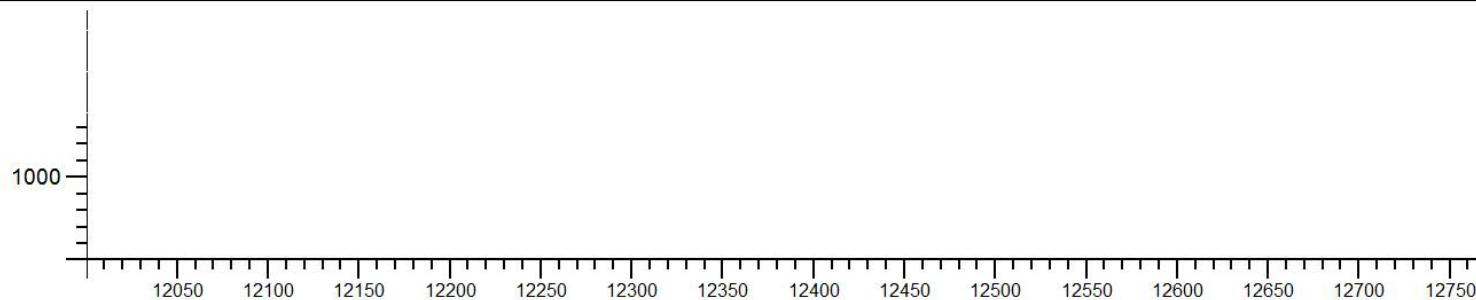

Supplement: raw_material.zip [file raw_material.zip]

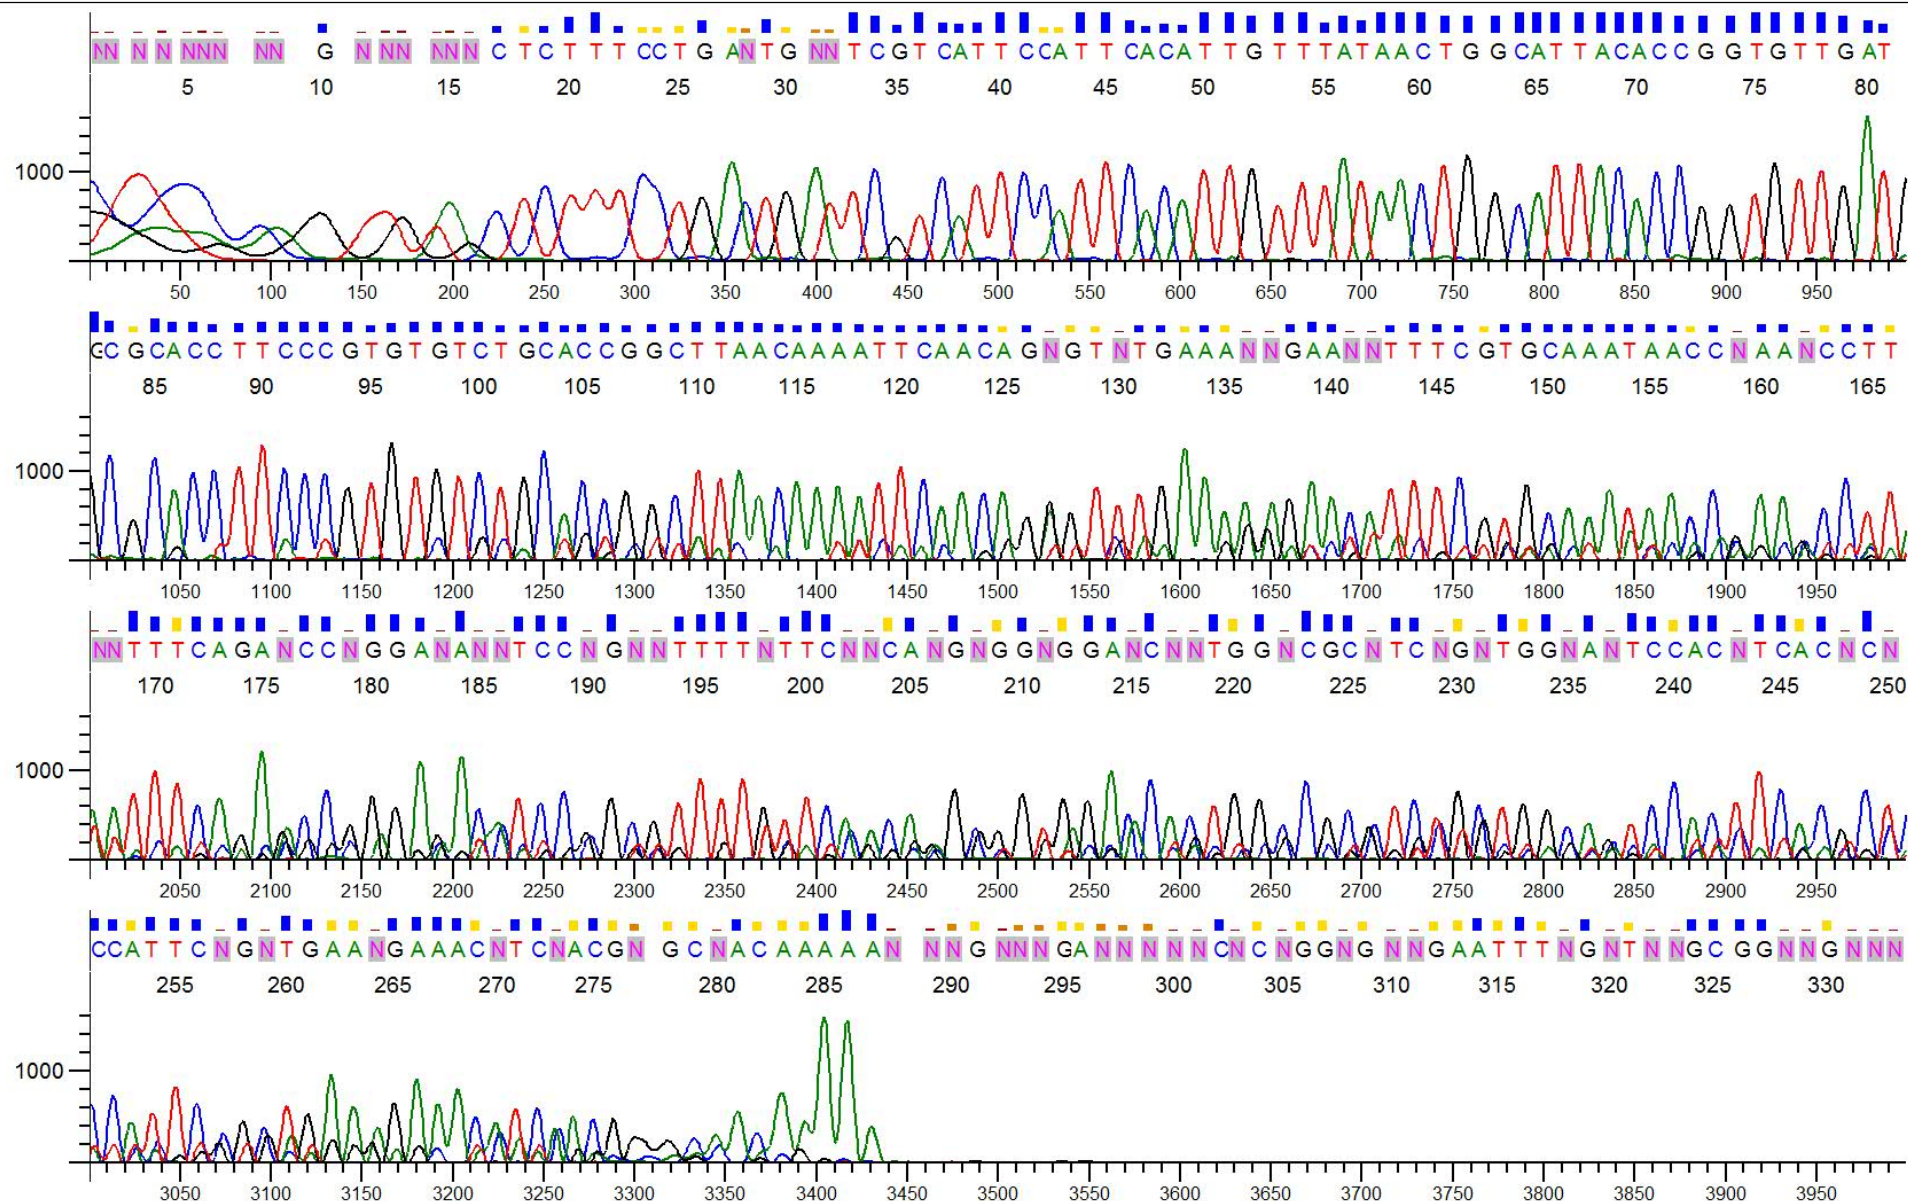

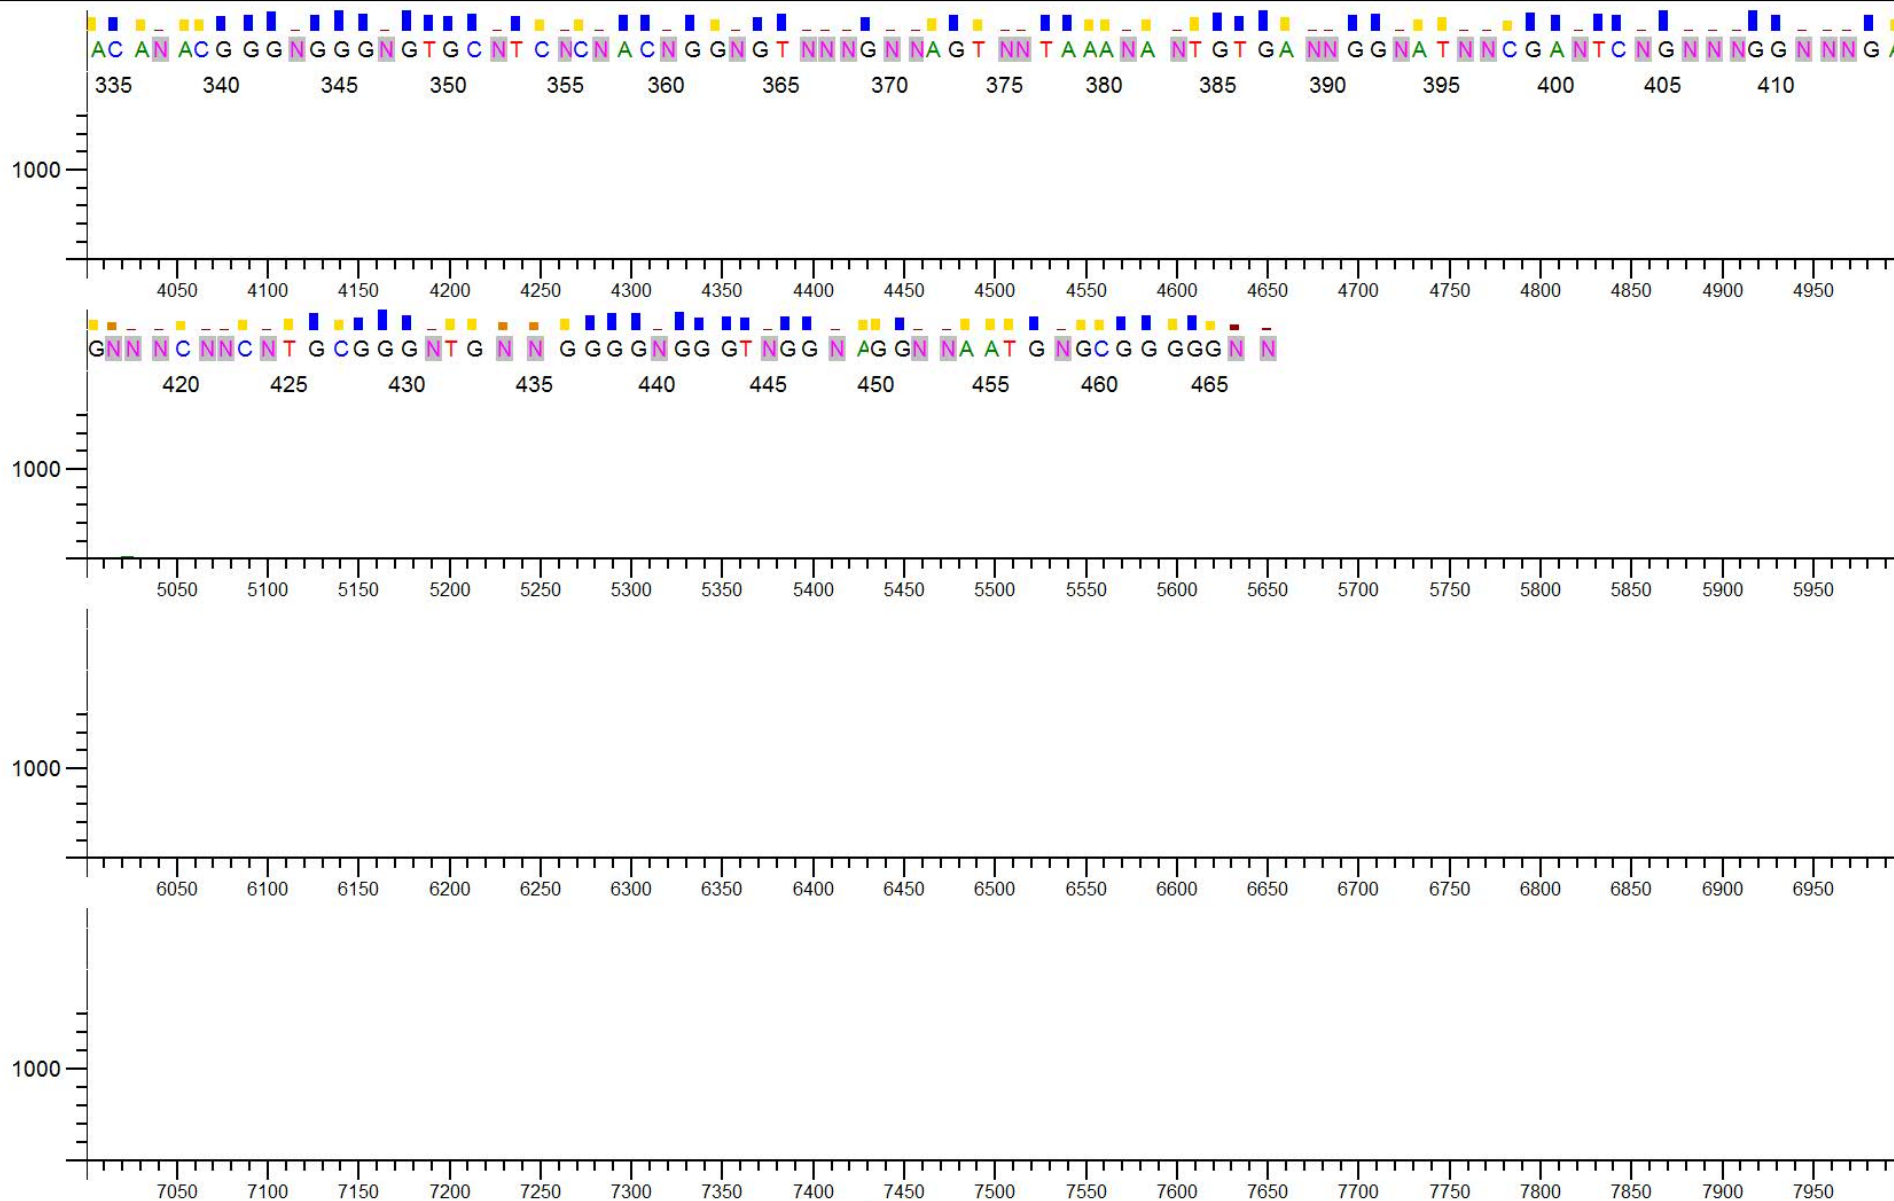

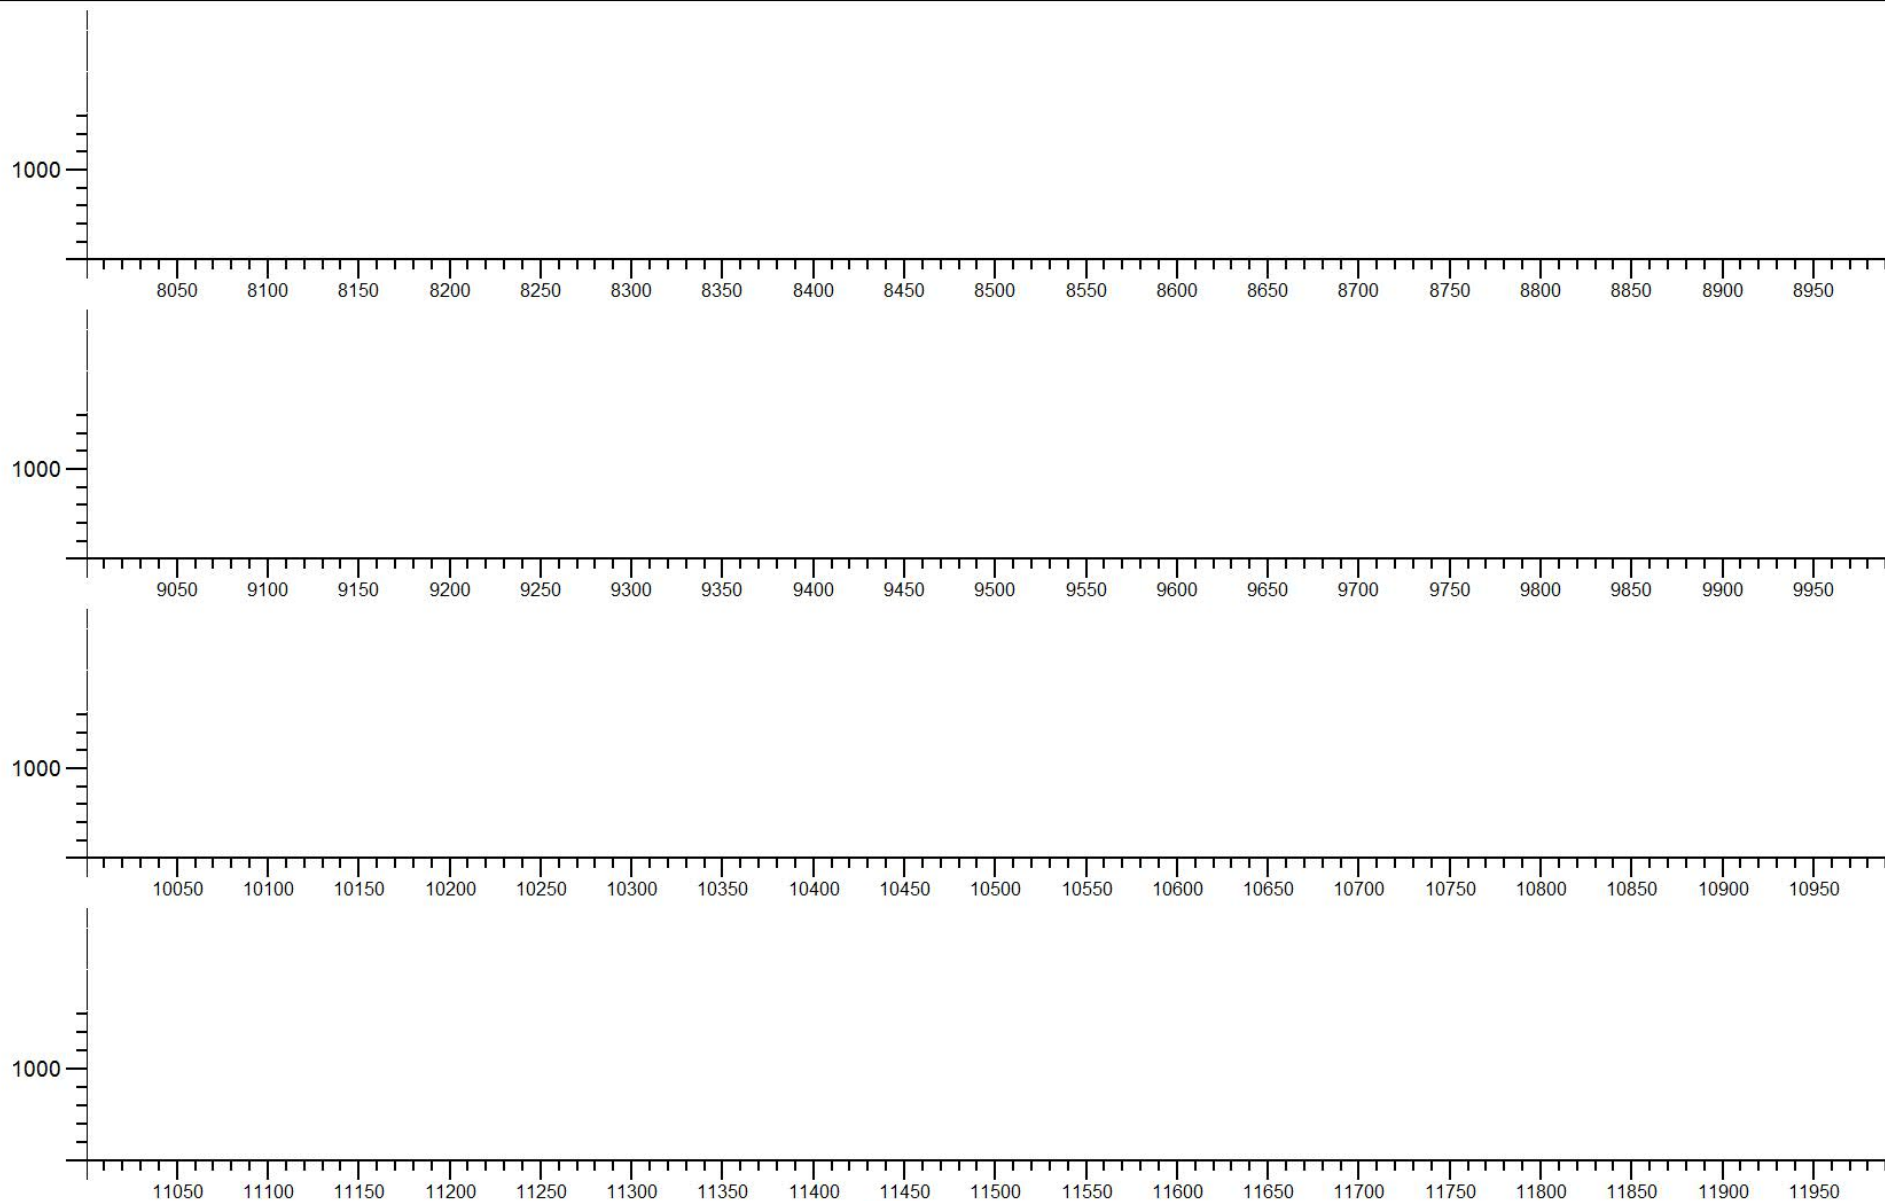



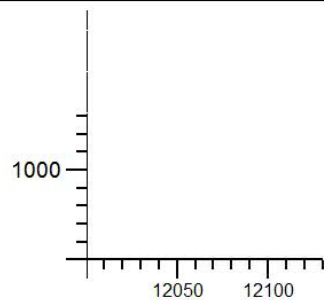

Supplement: raw_material.zip [file raw_material.zip]

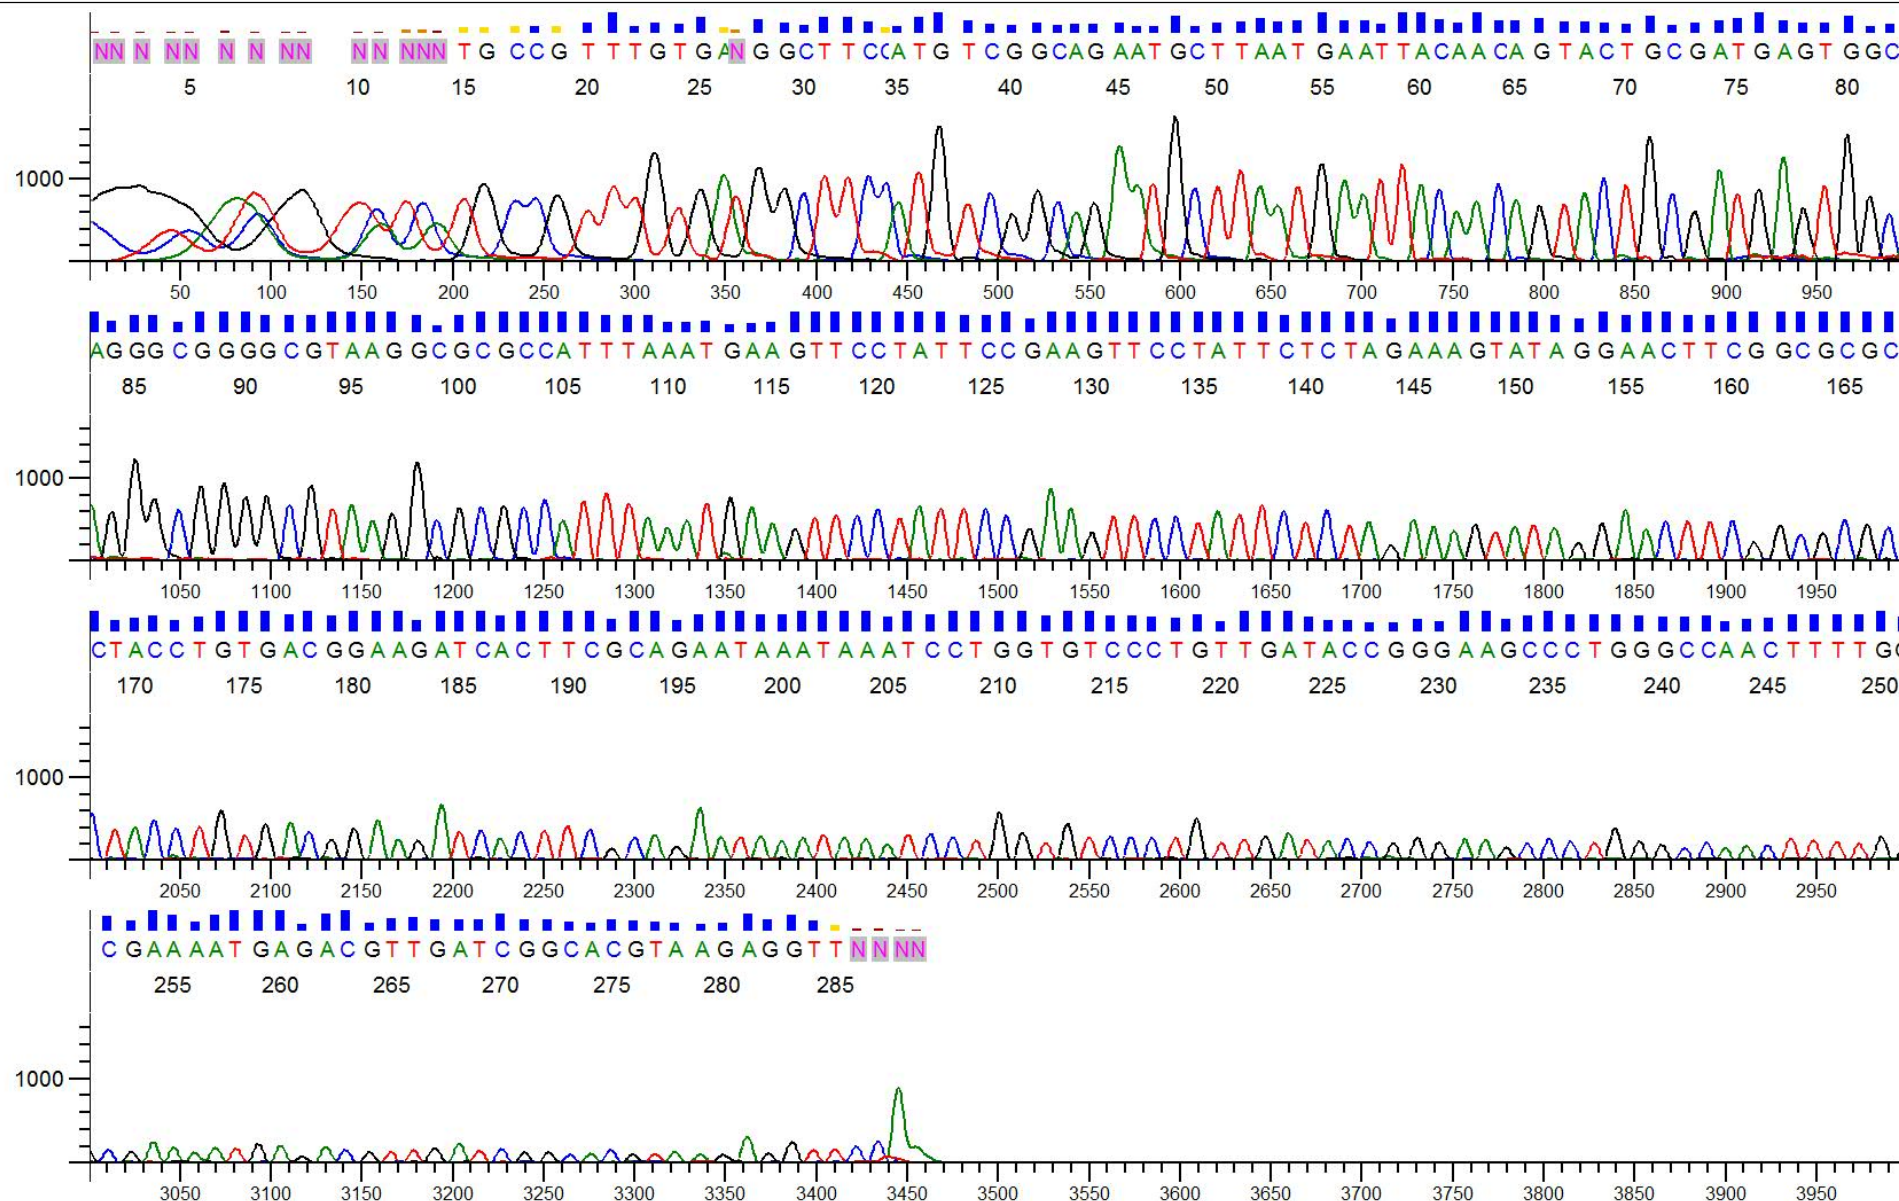

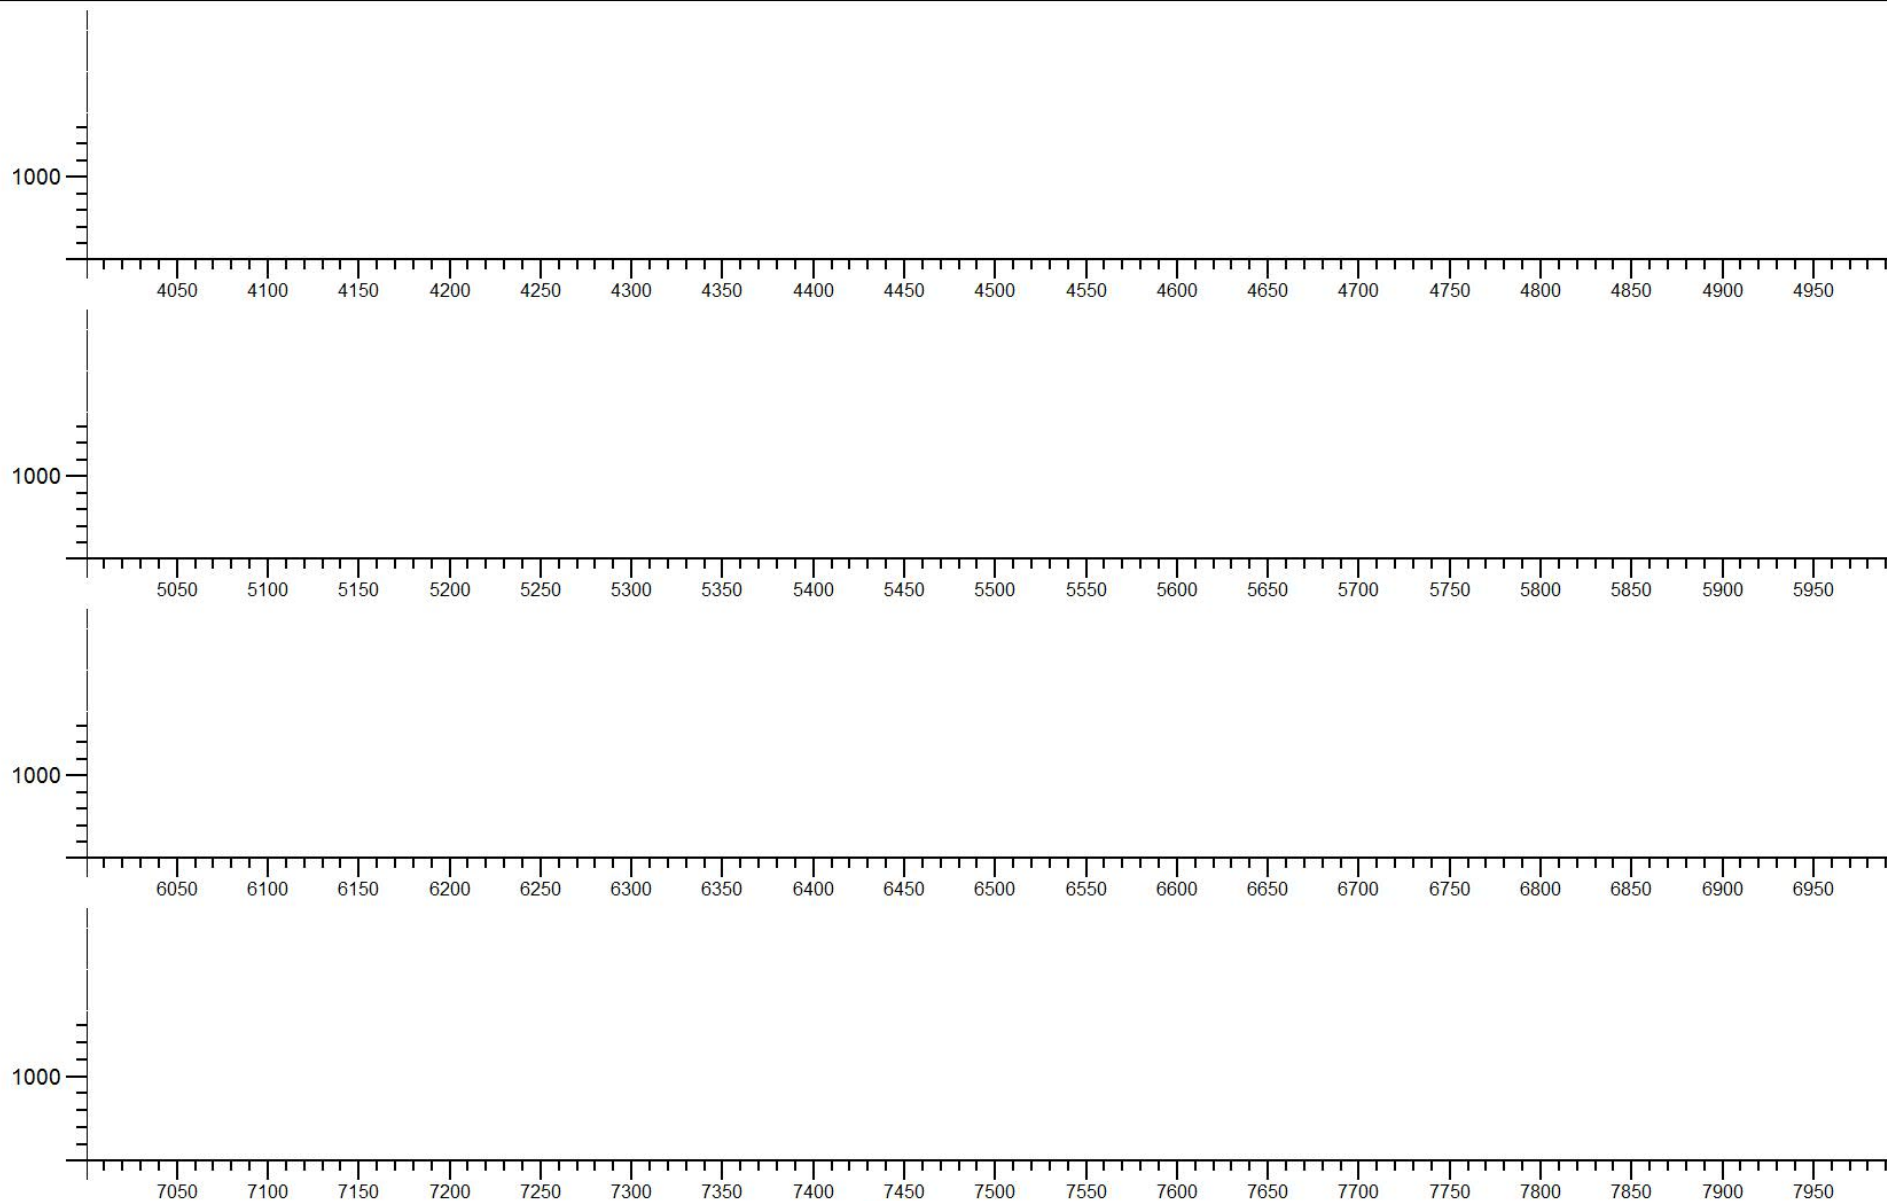

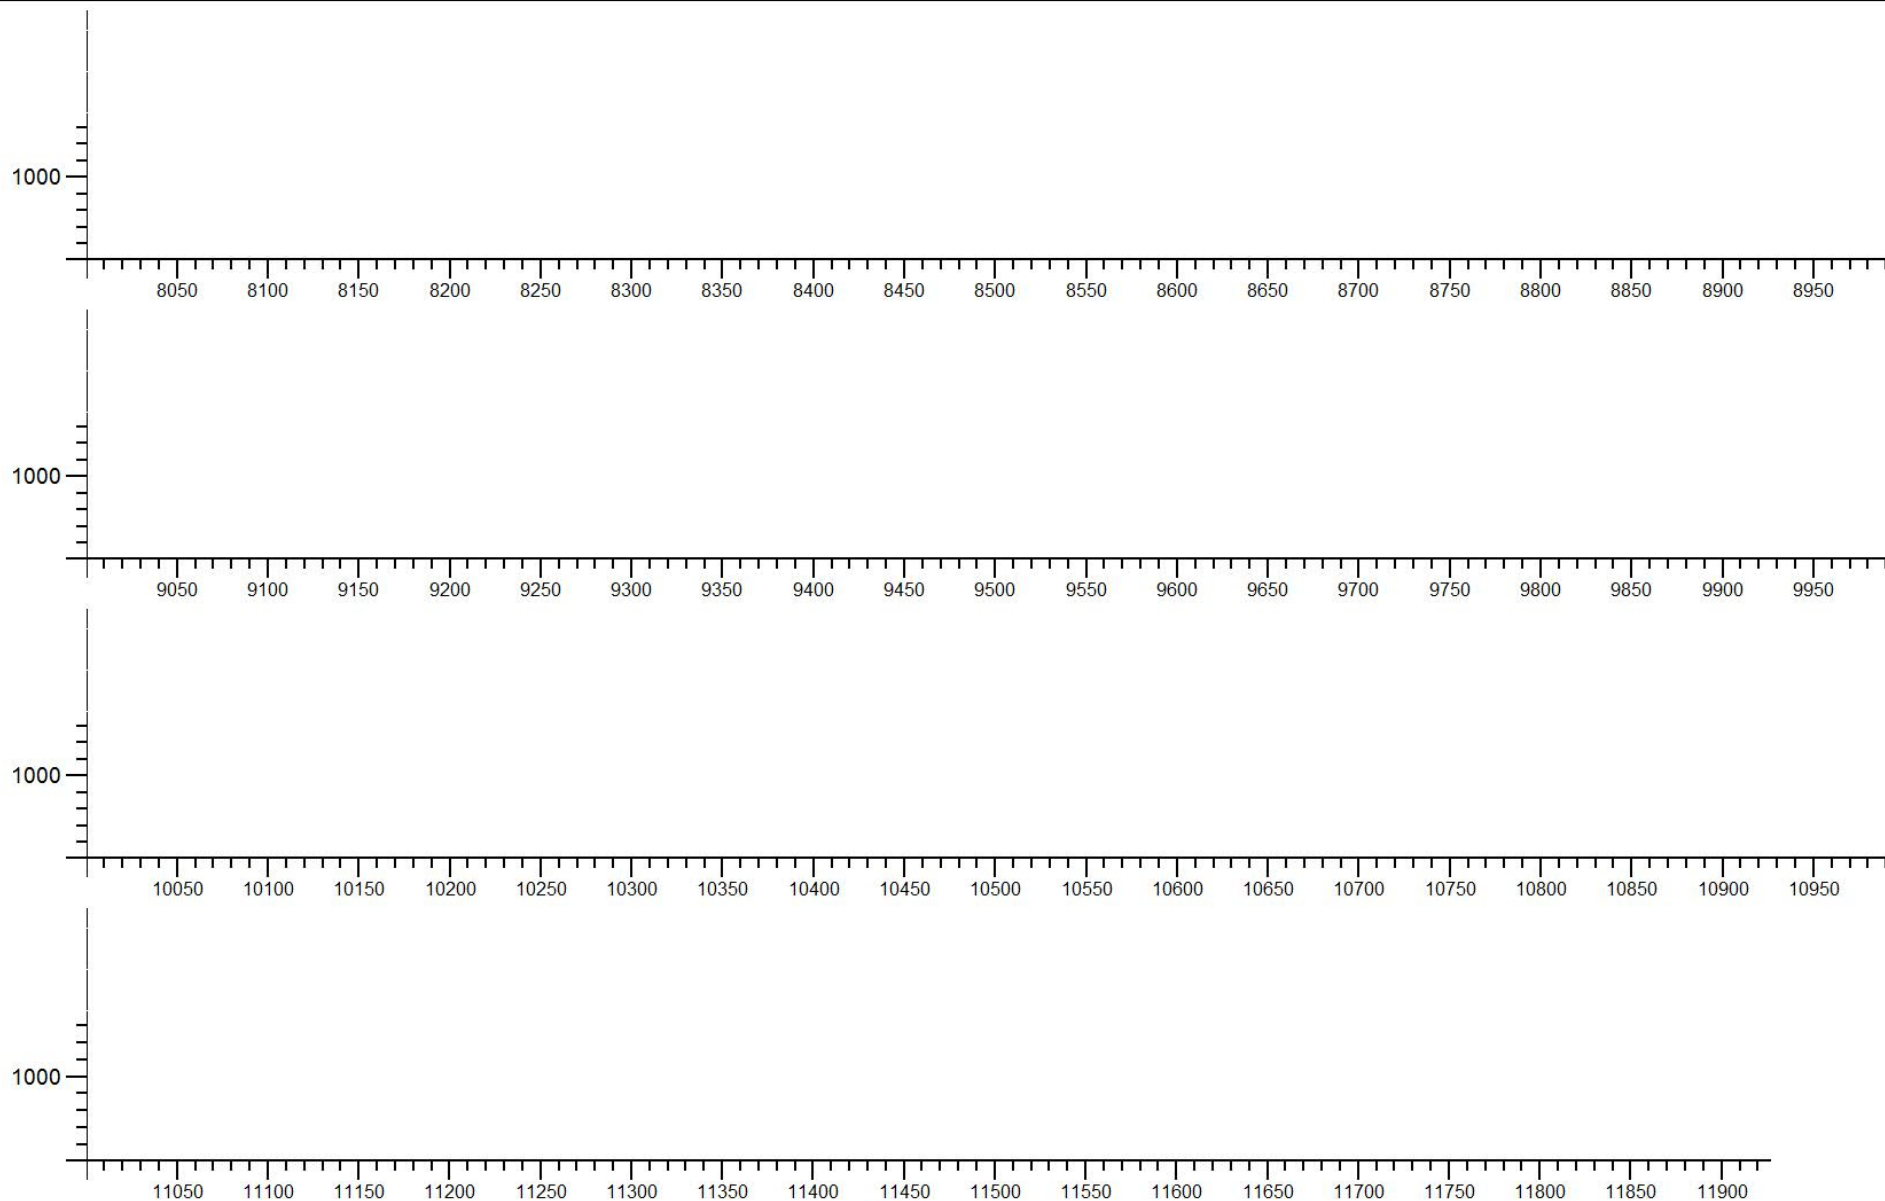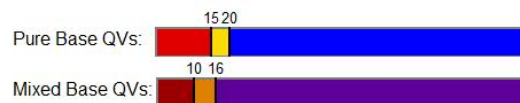

Supplement: raw_material.zip [file raw_material.zip]

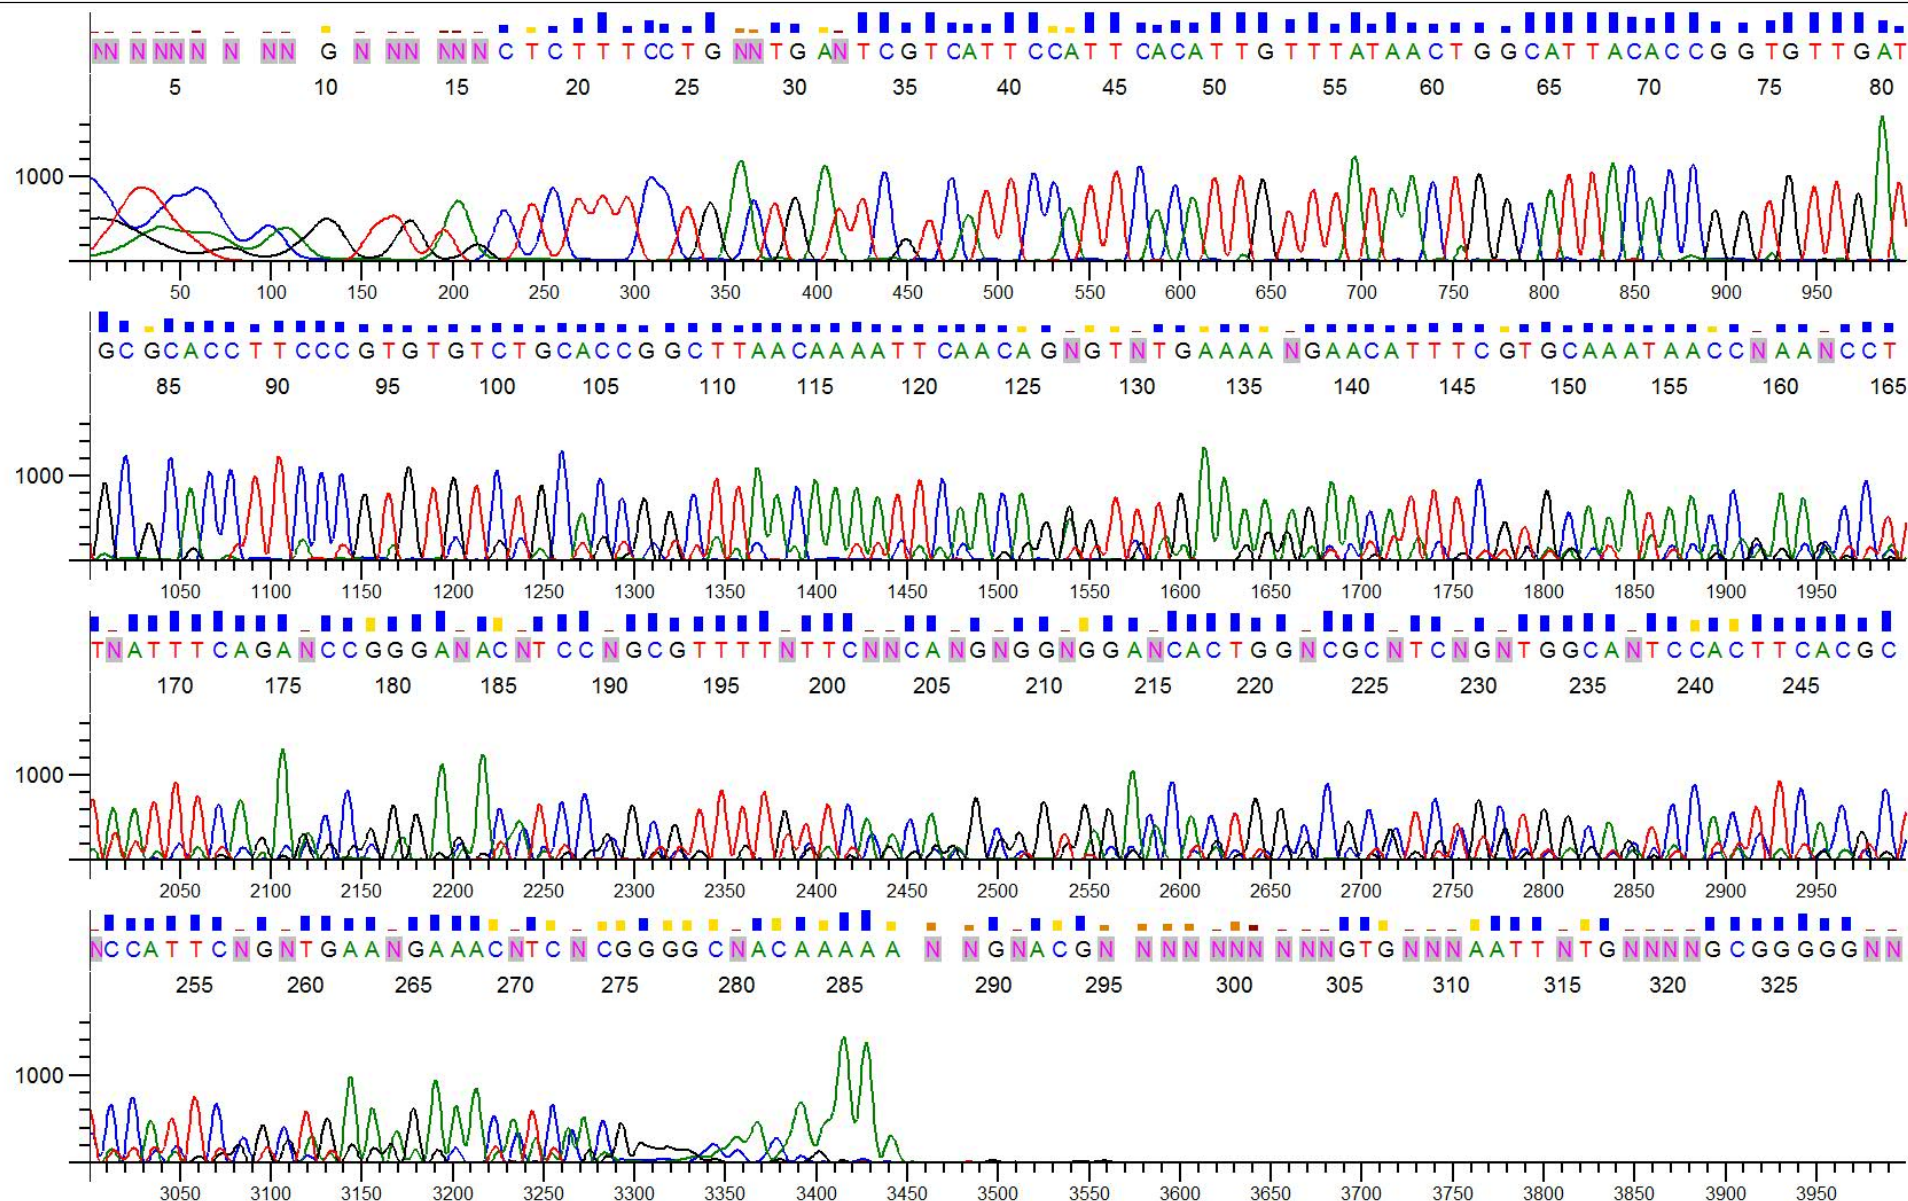

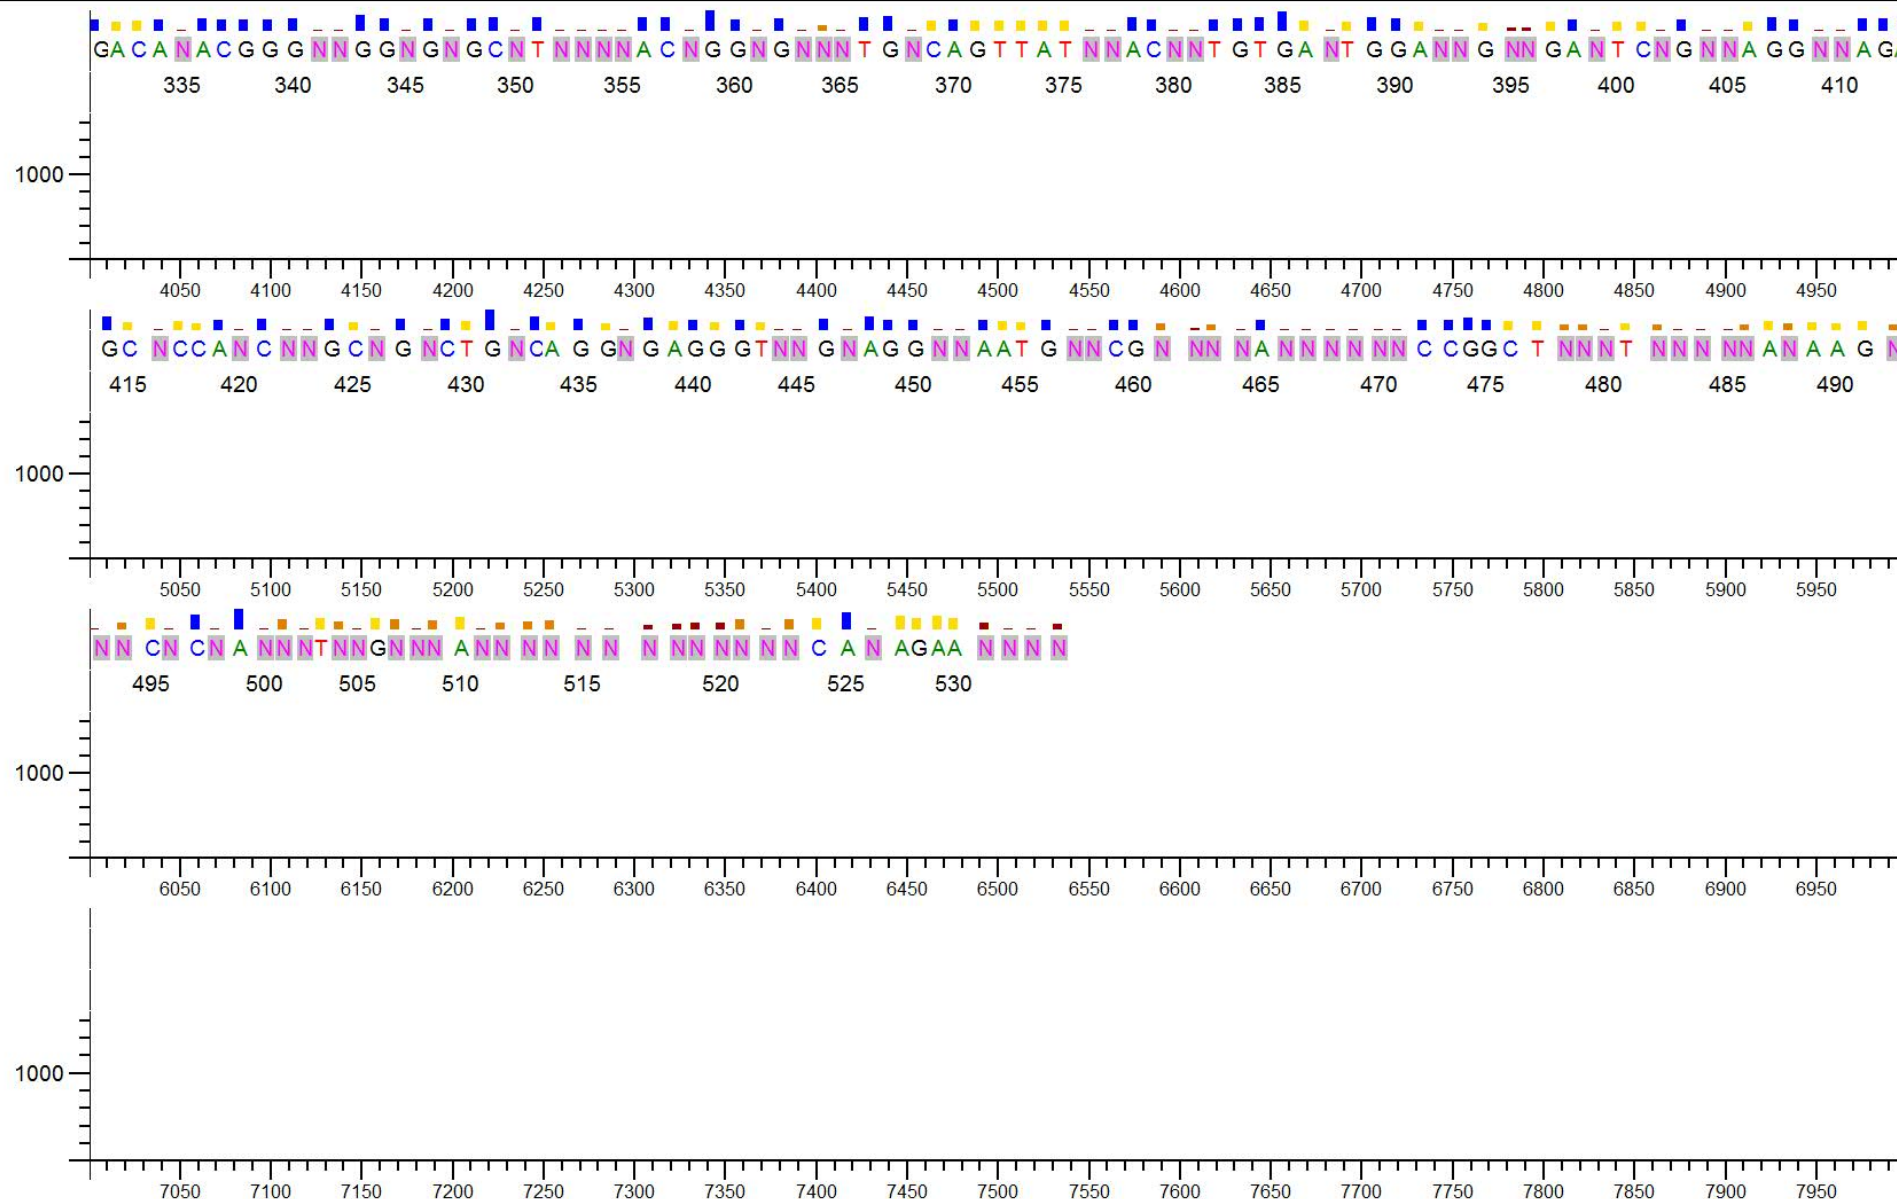

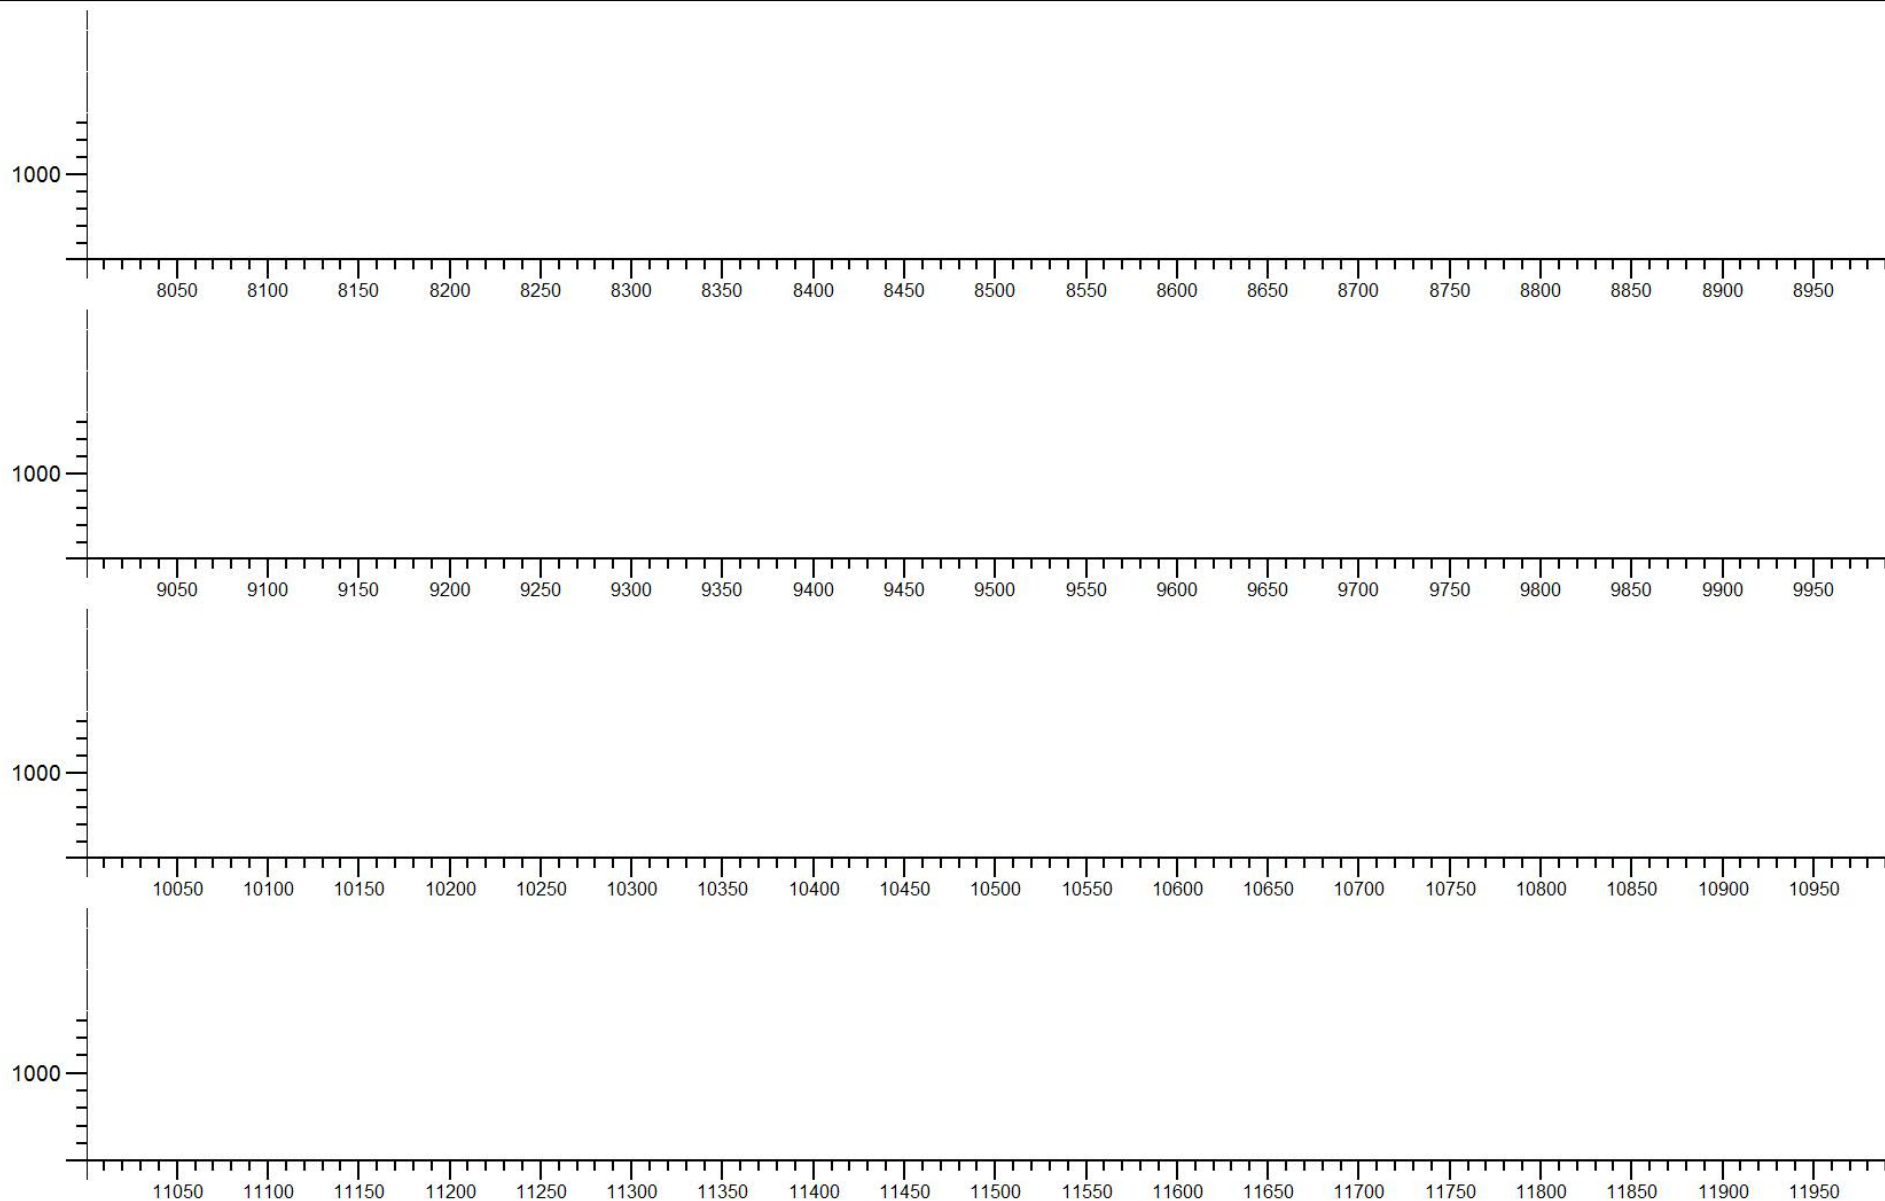



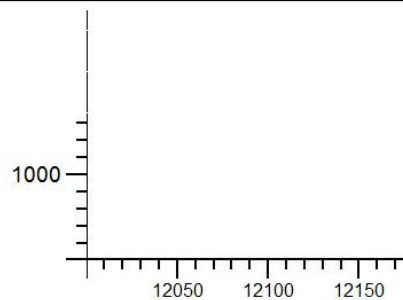

Supplement: raw_material.zip [file raw_material.zip]

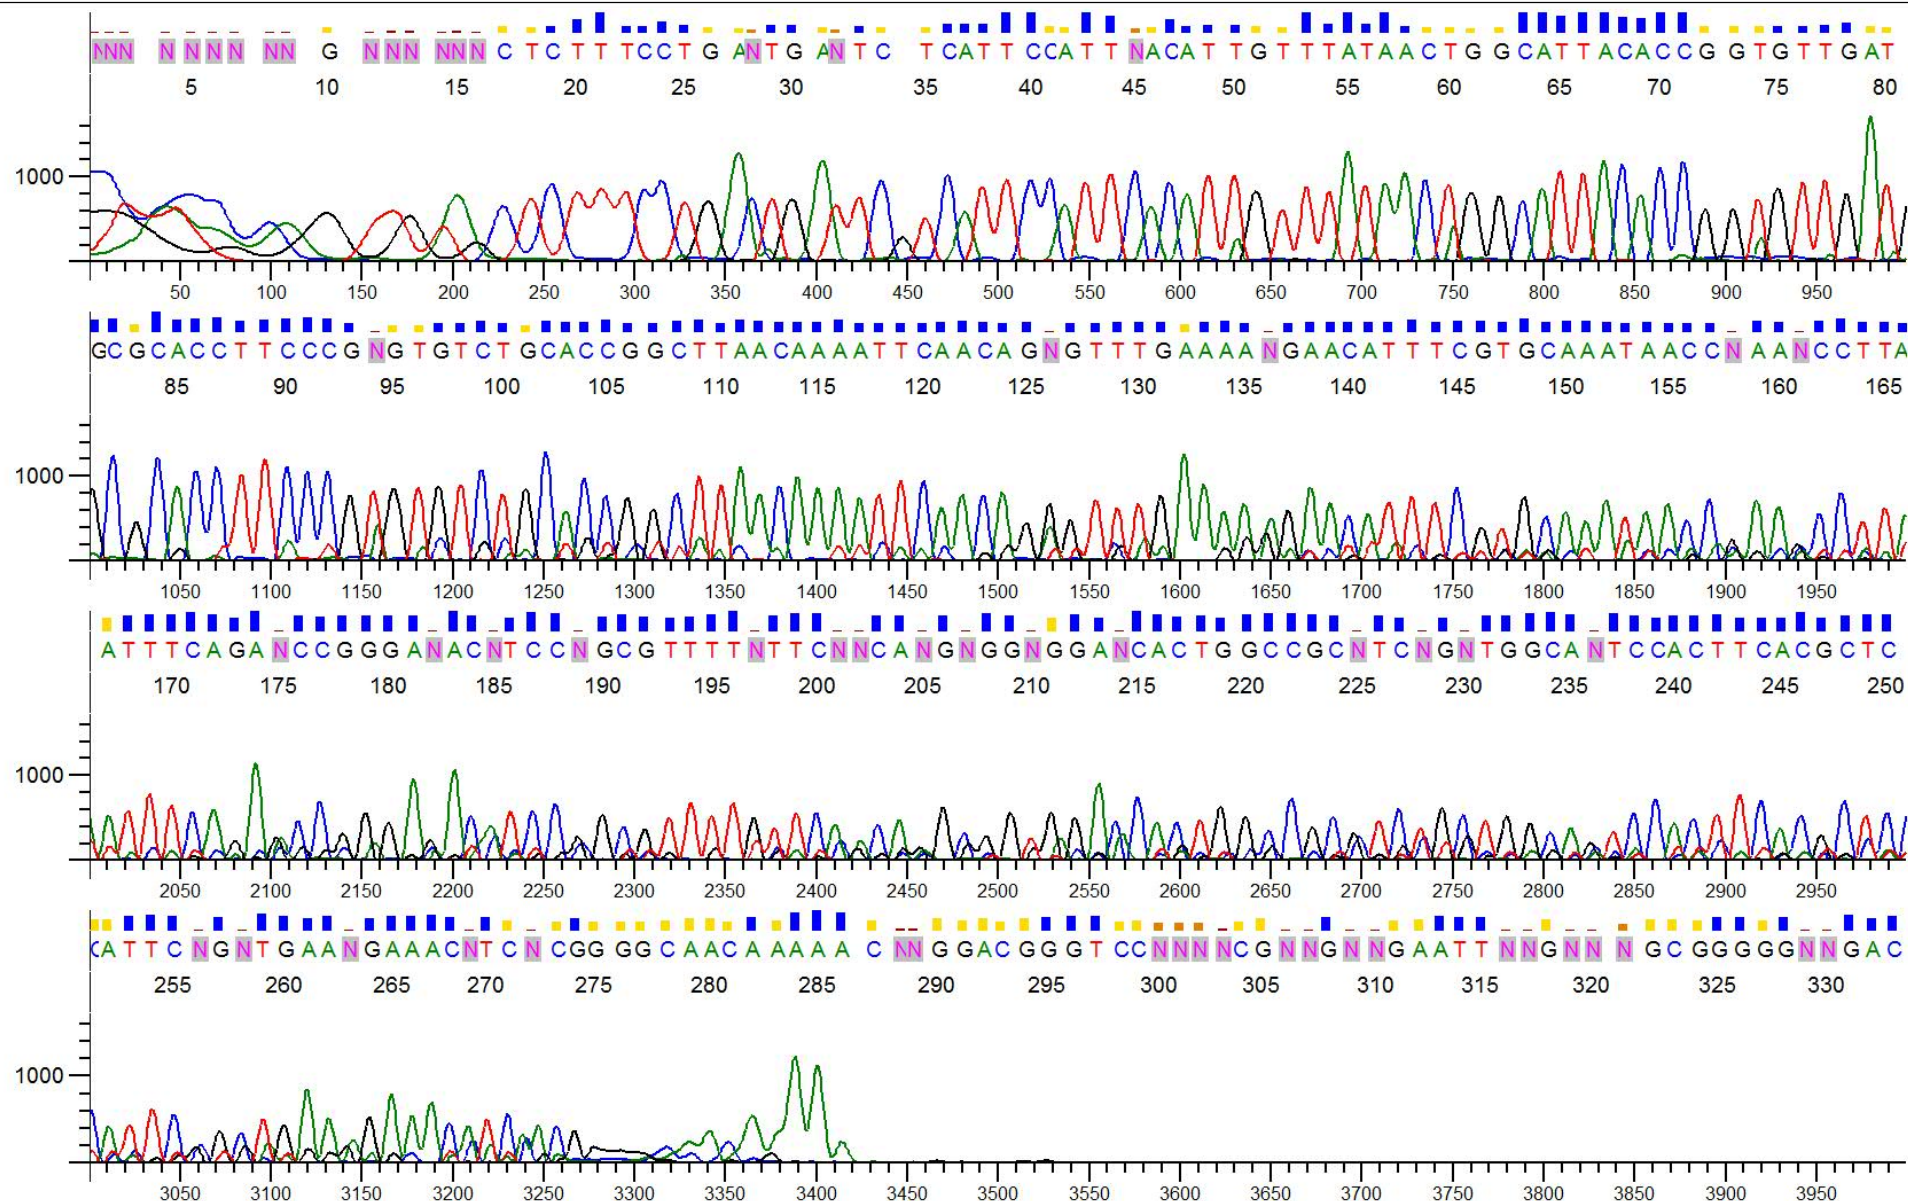

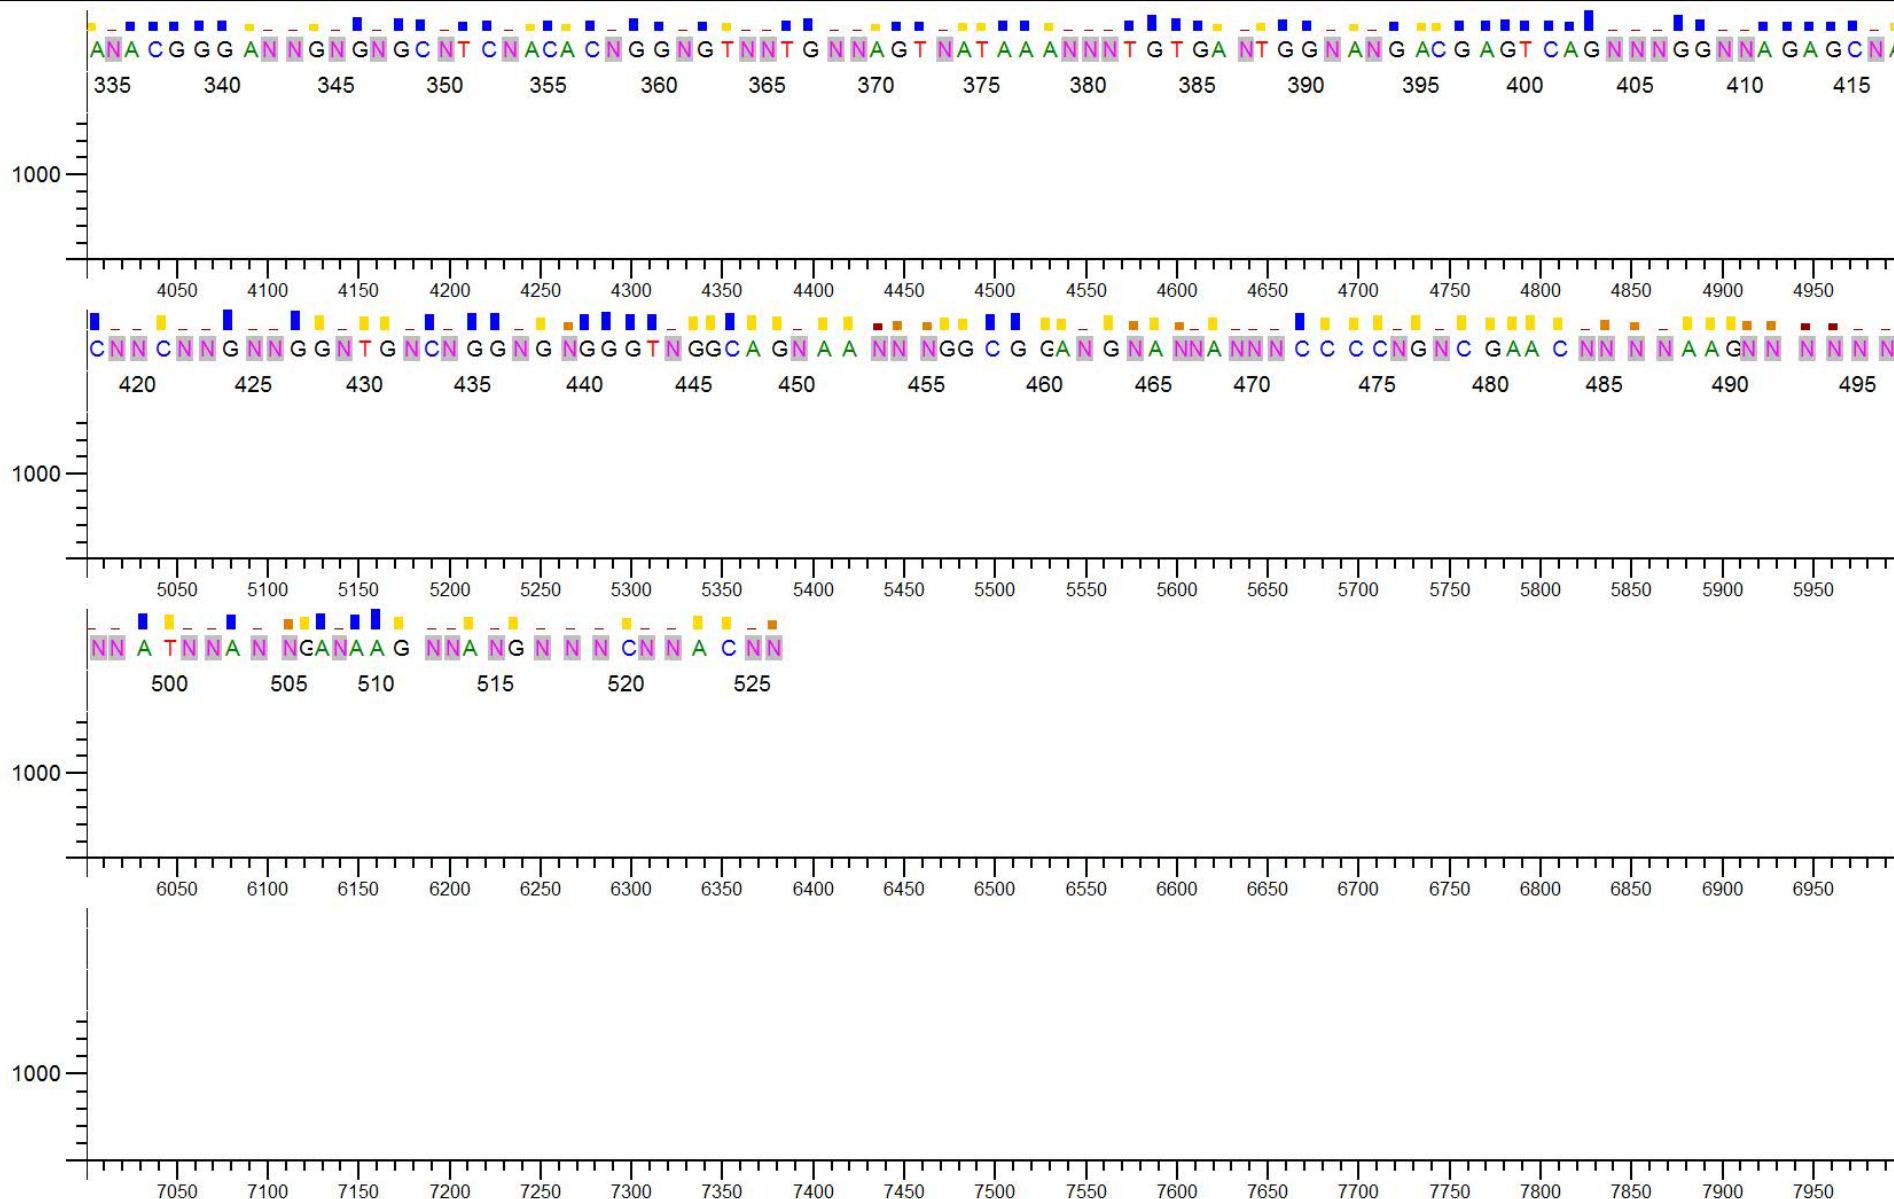

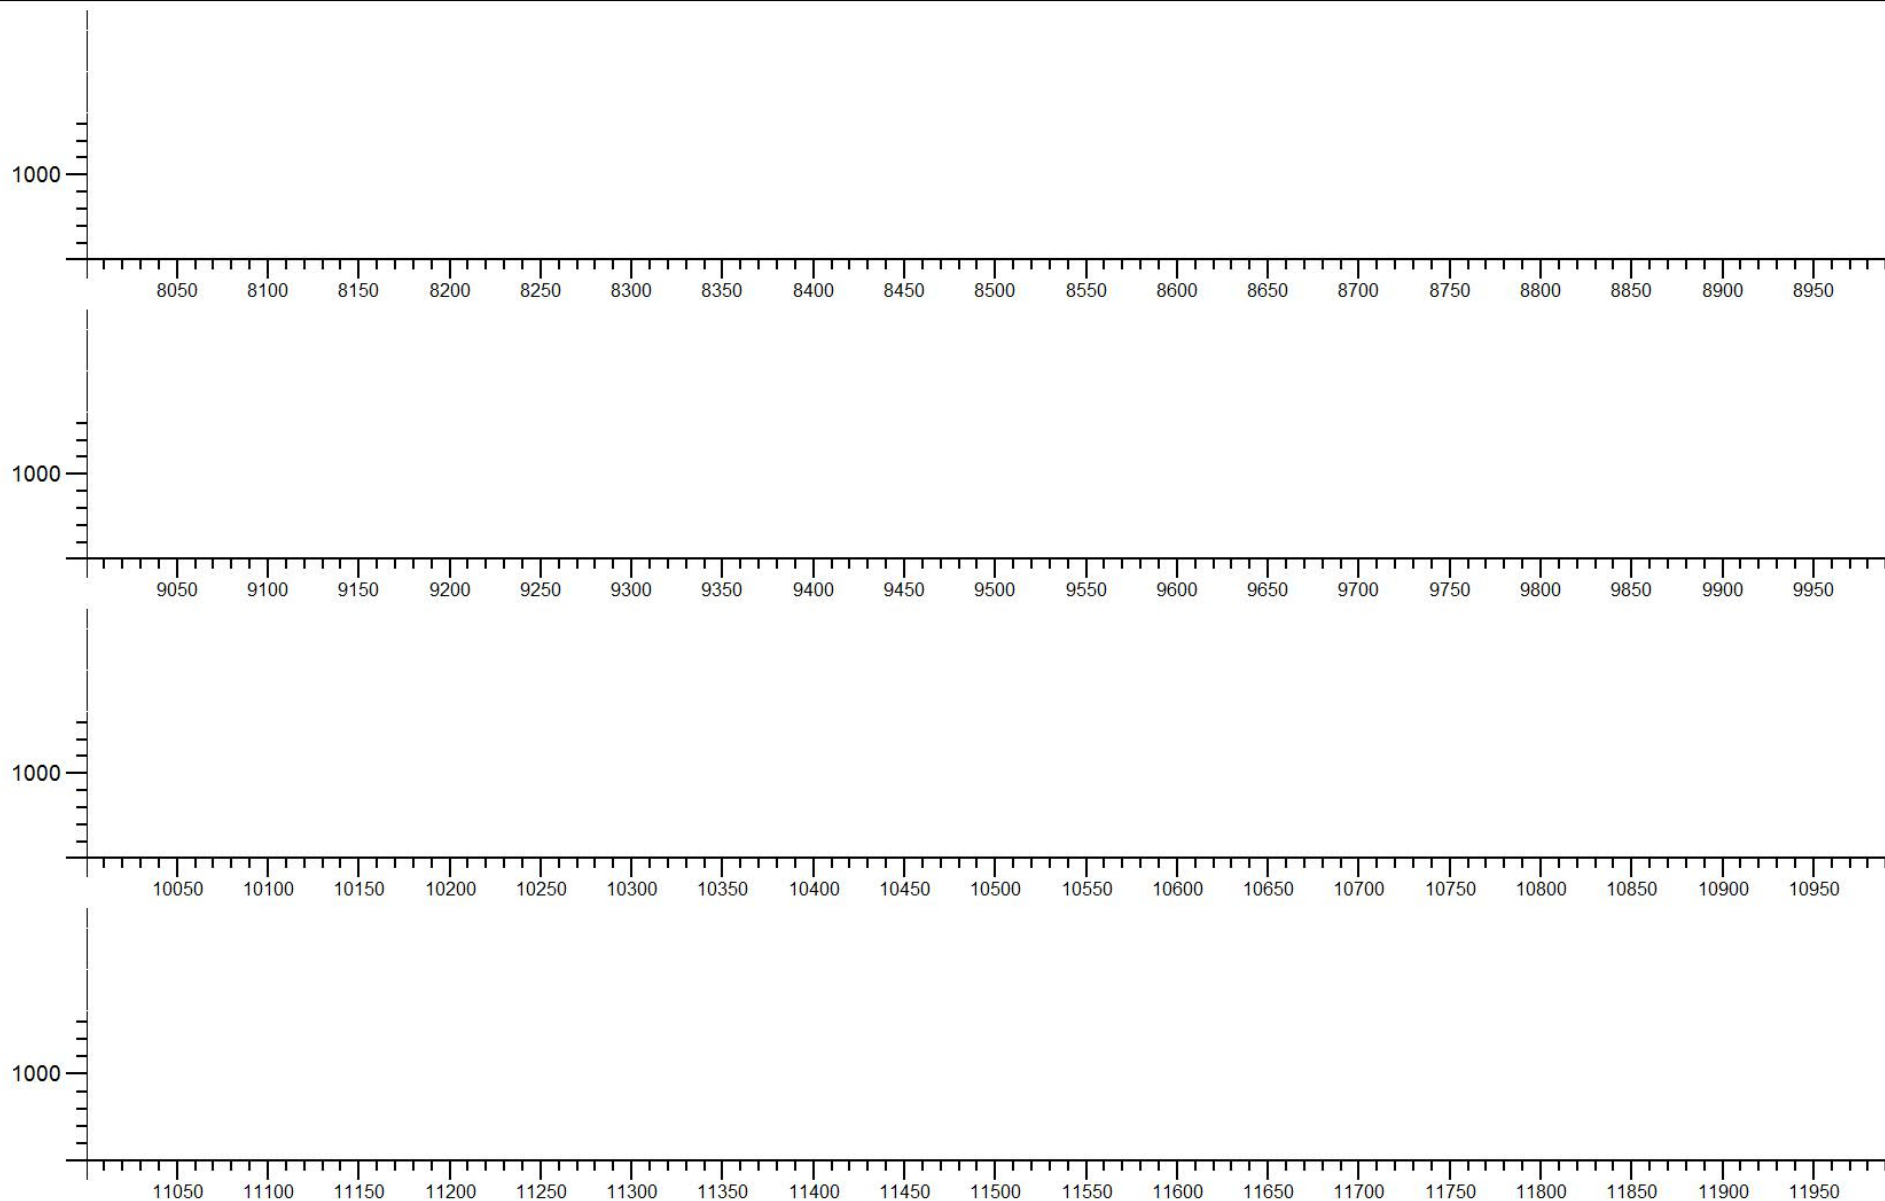



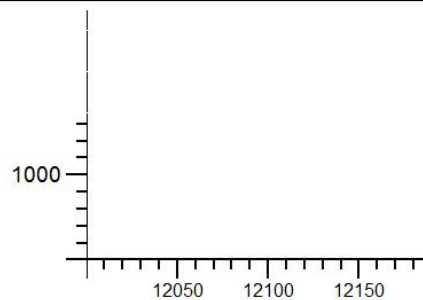

Supplement: raw_material.zip [file raw_material.zip]

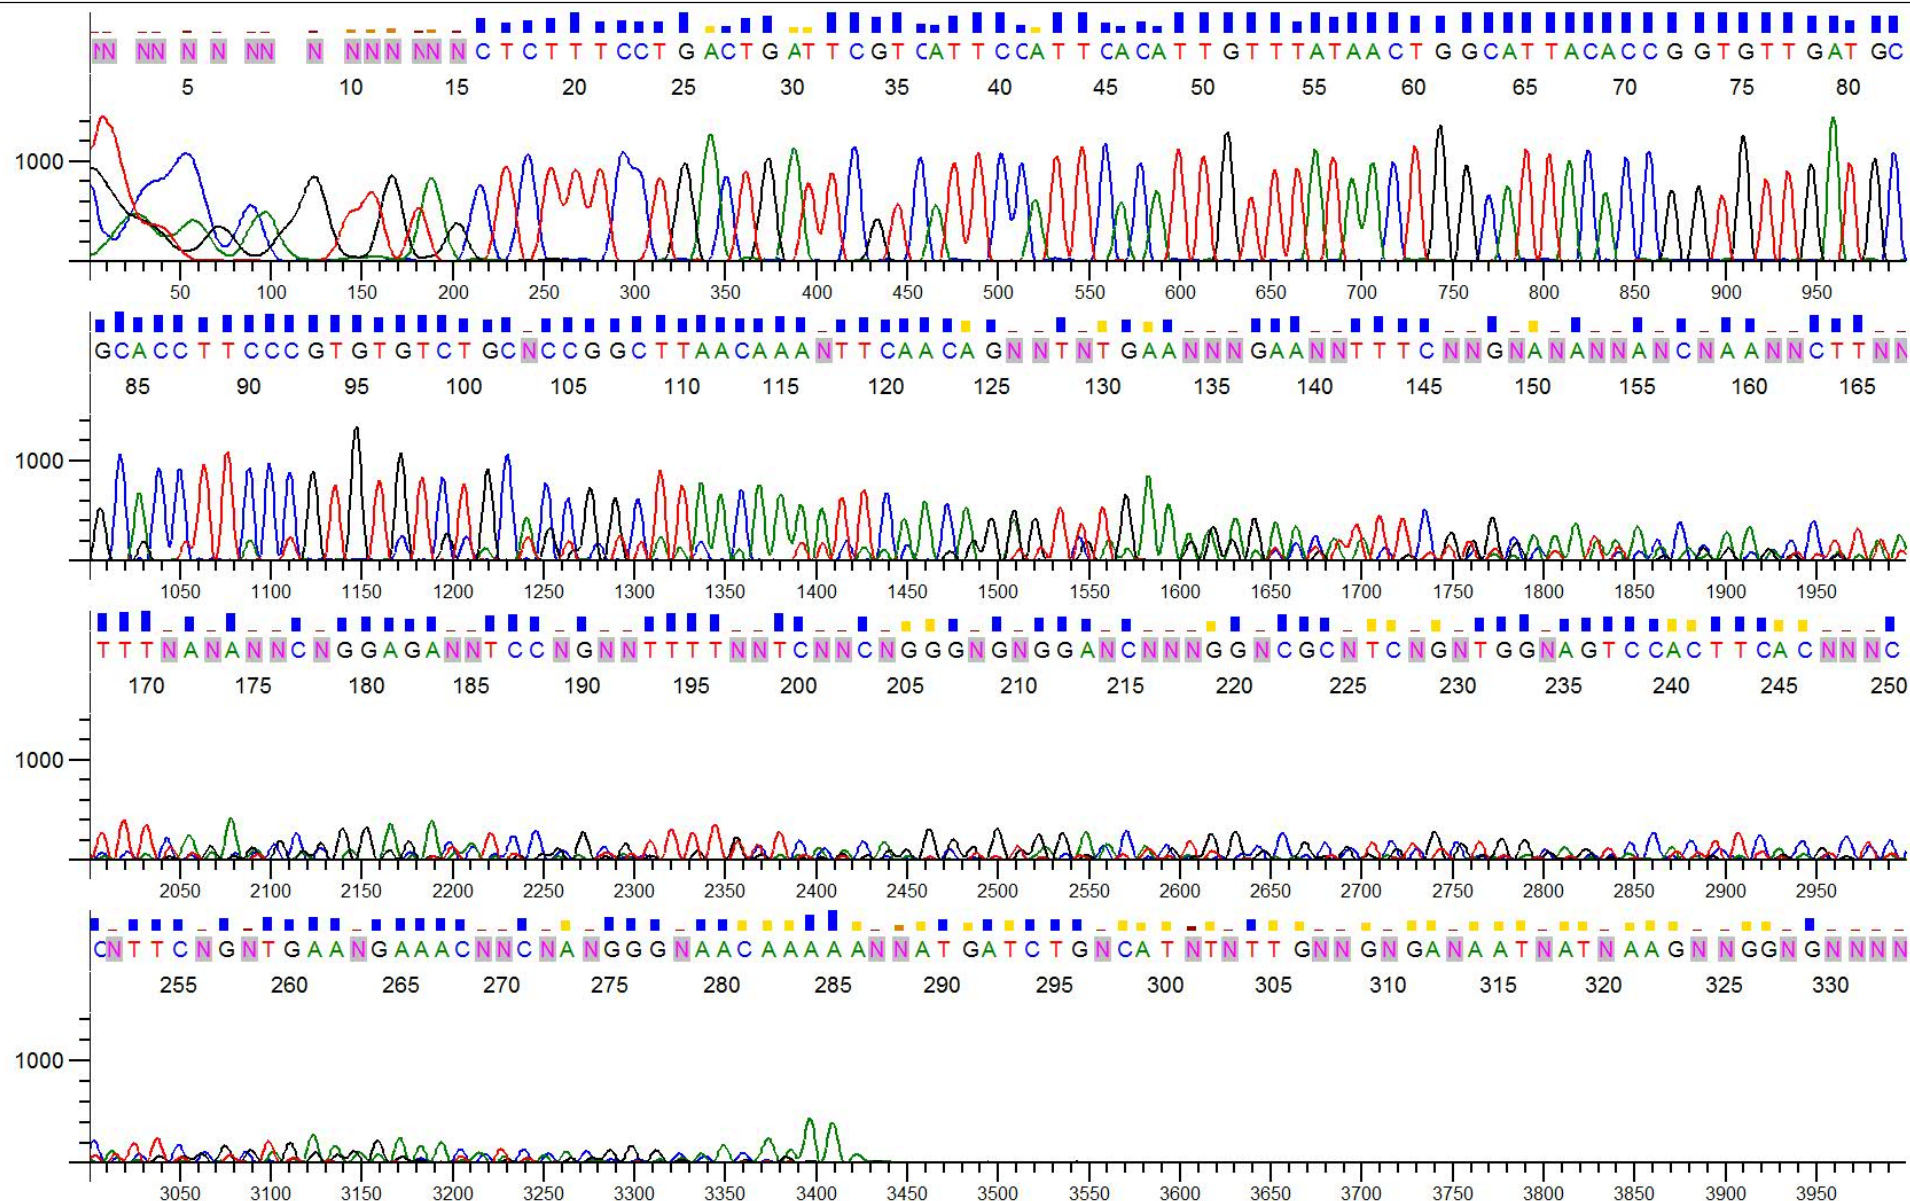

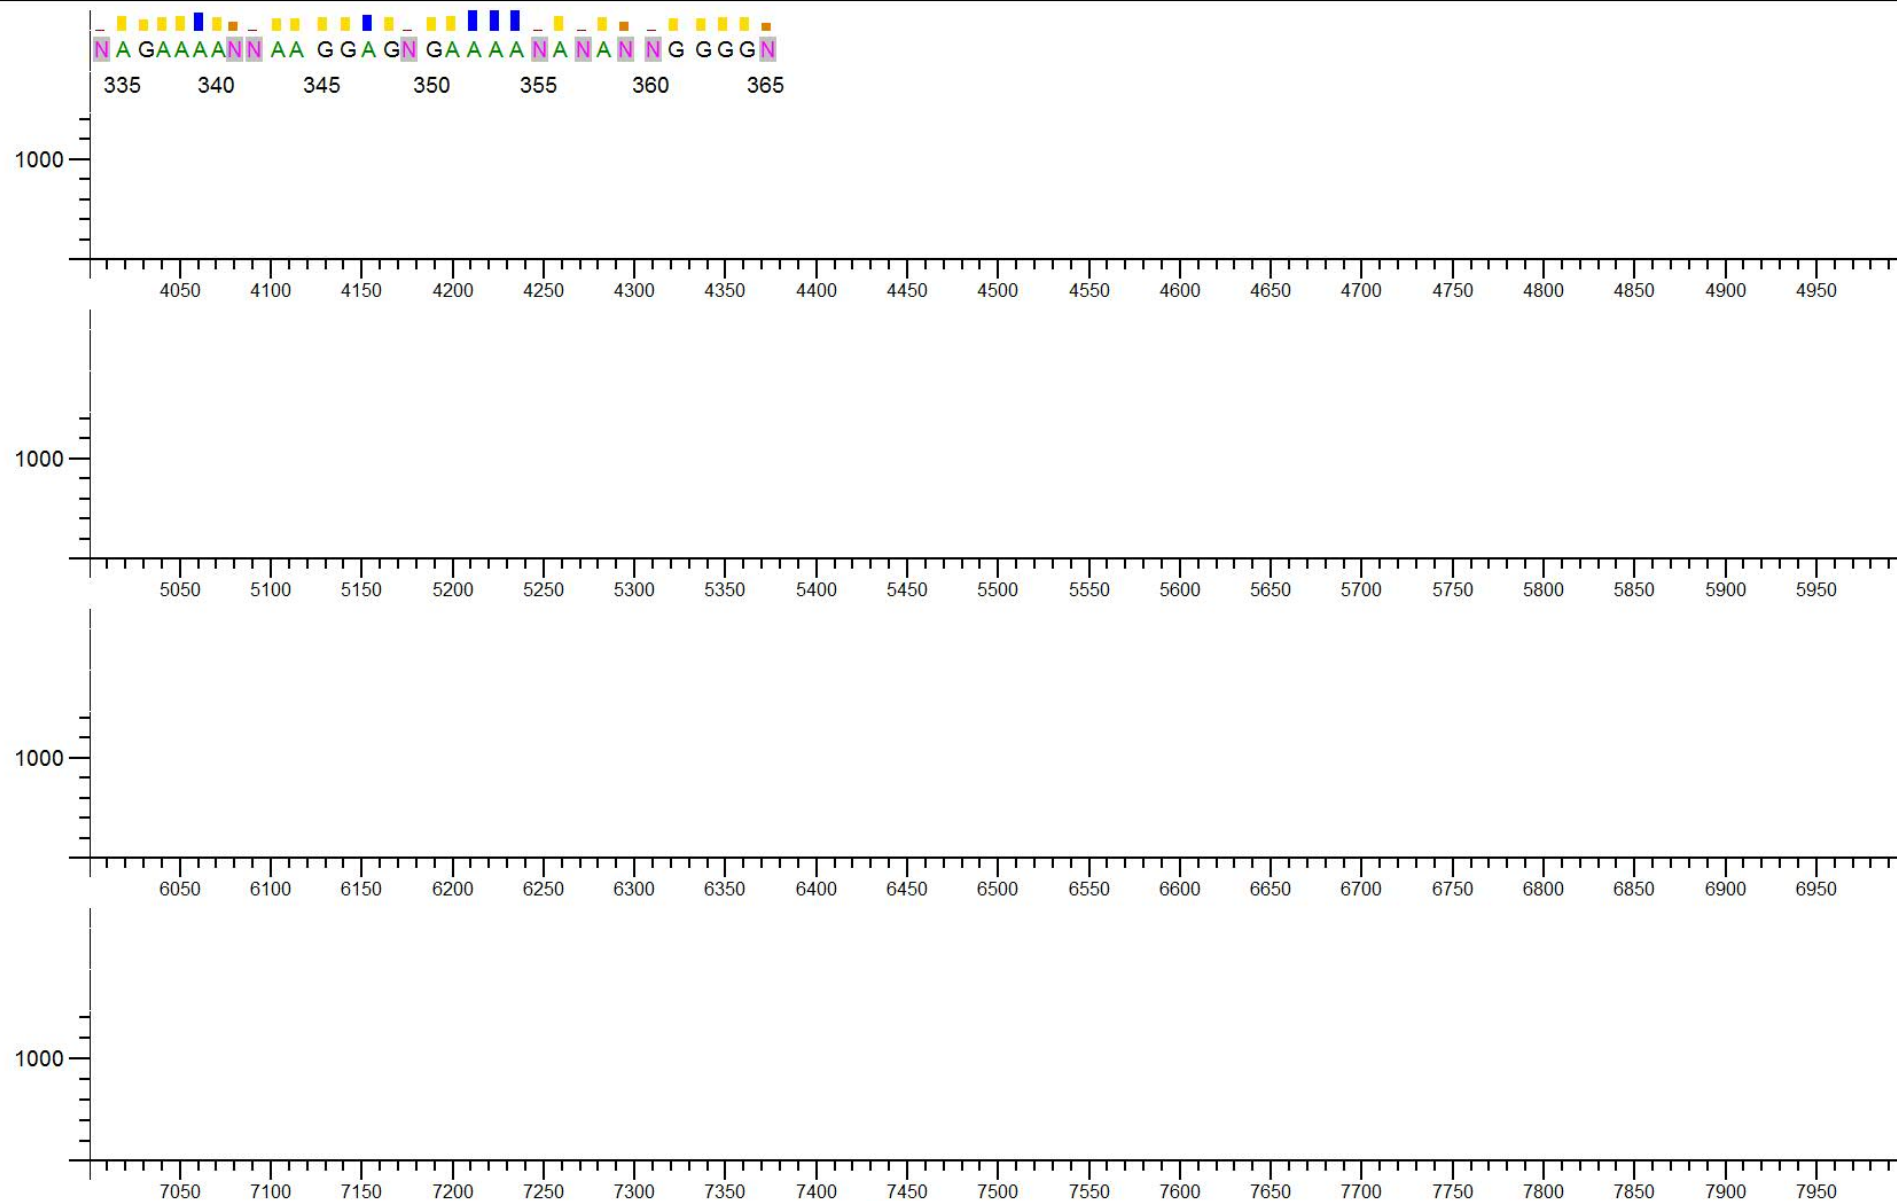

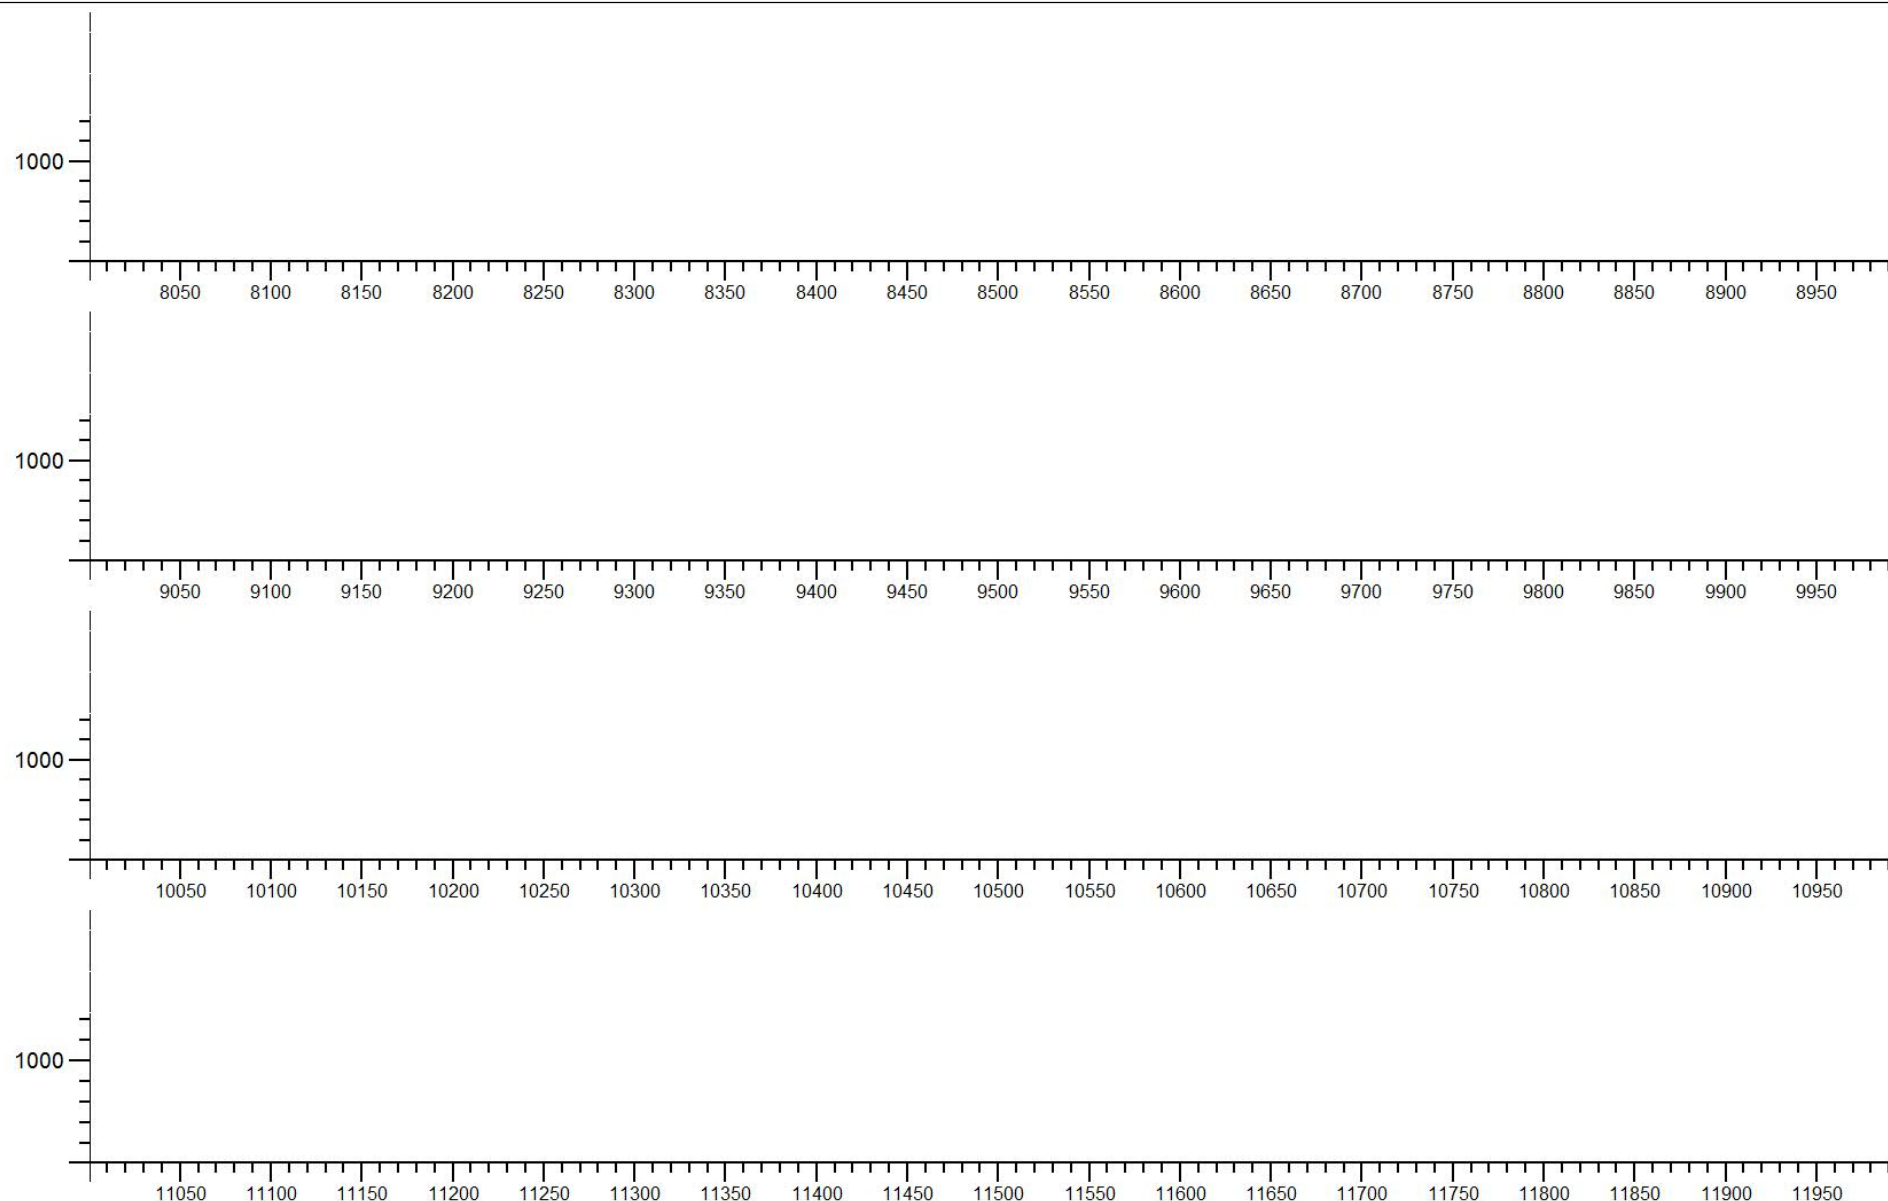

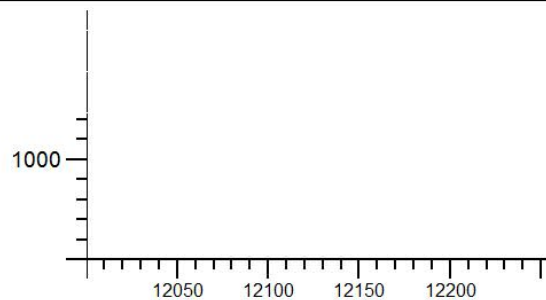

Supplement: raw_material.zip [file raw_material.zip]

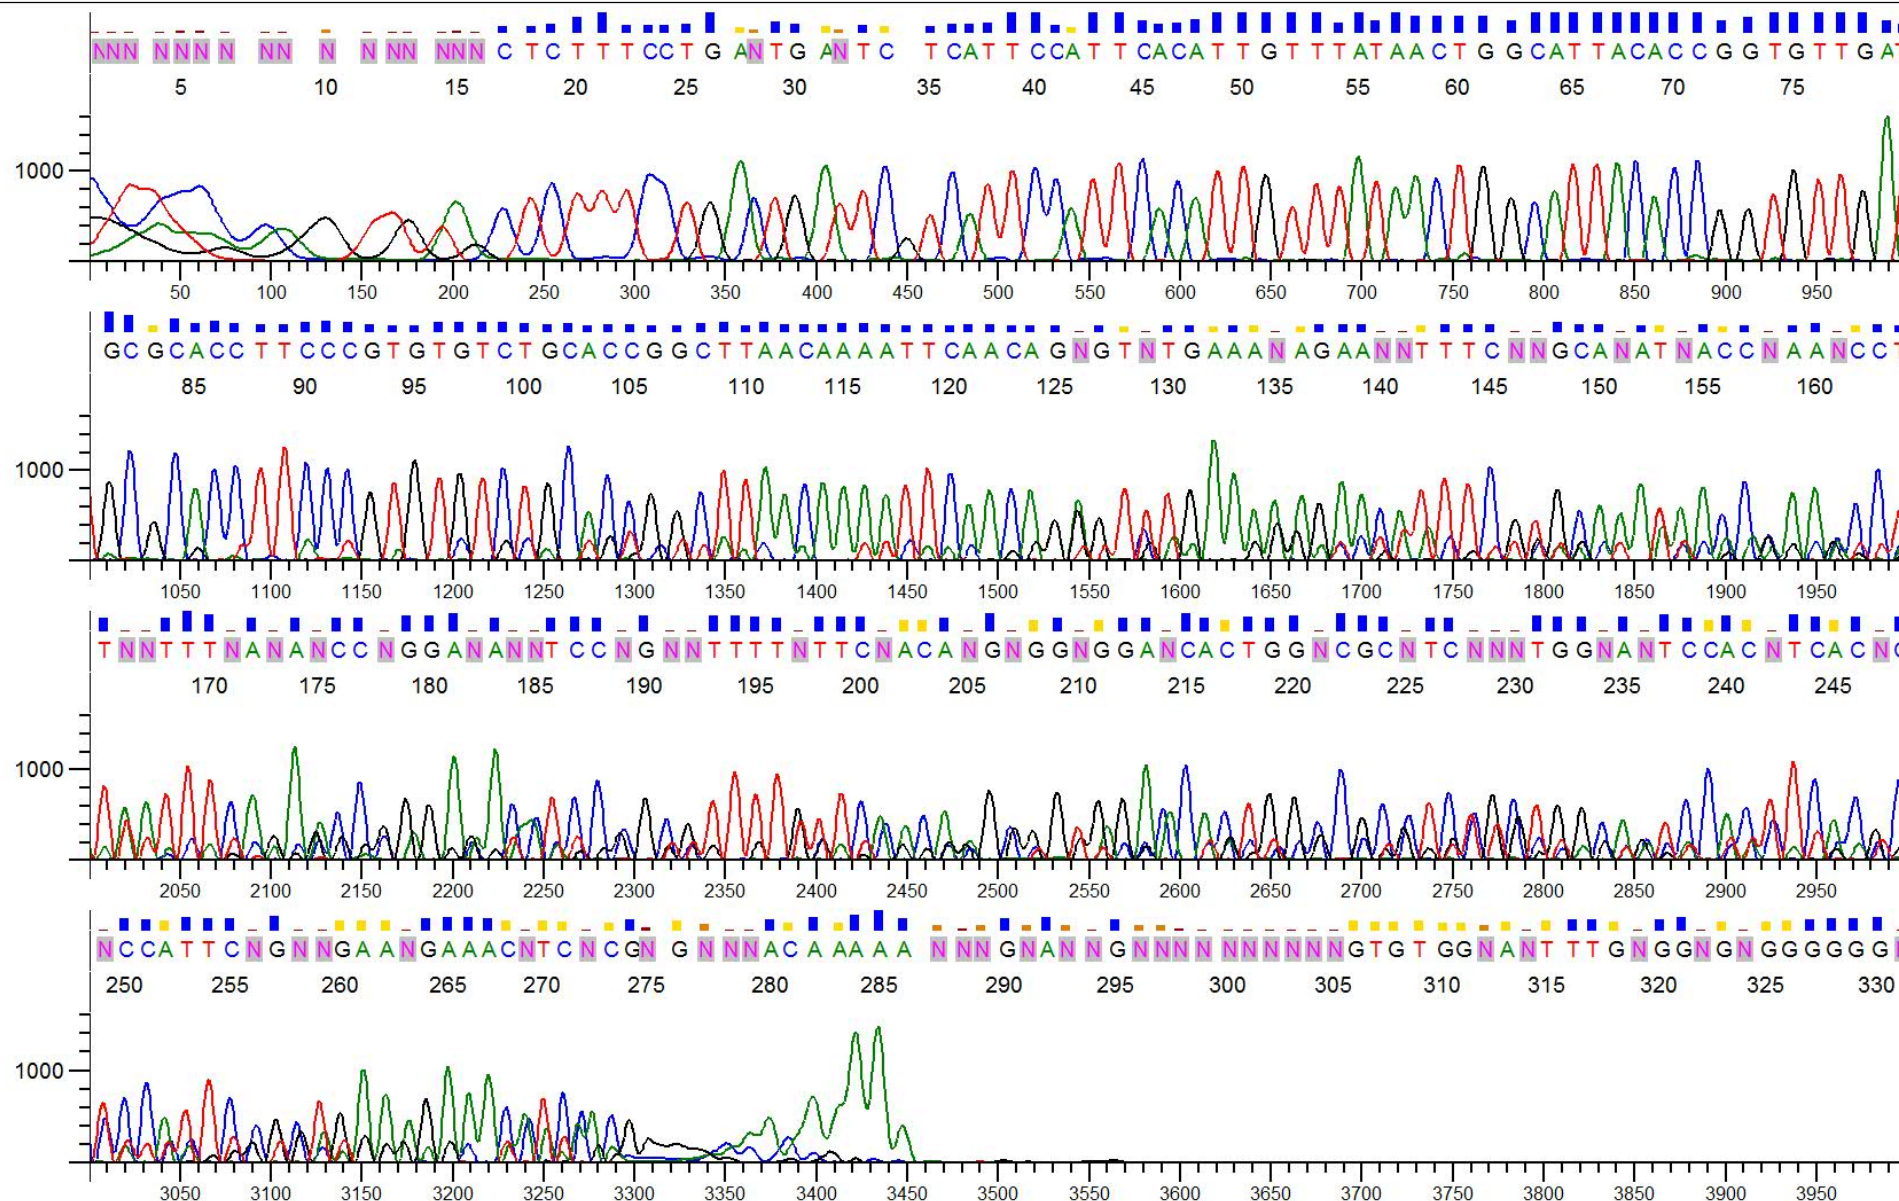

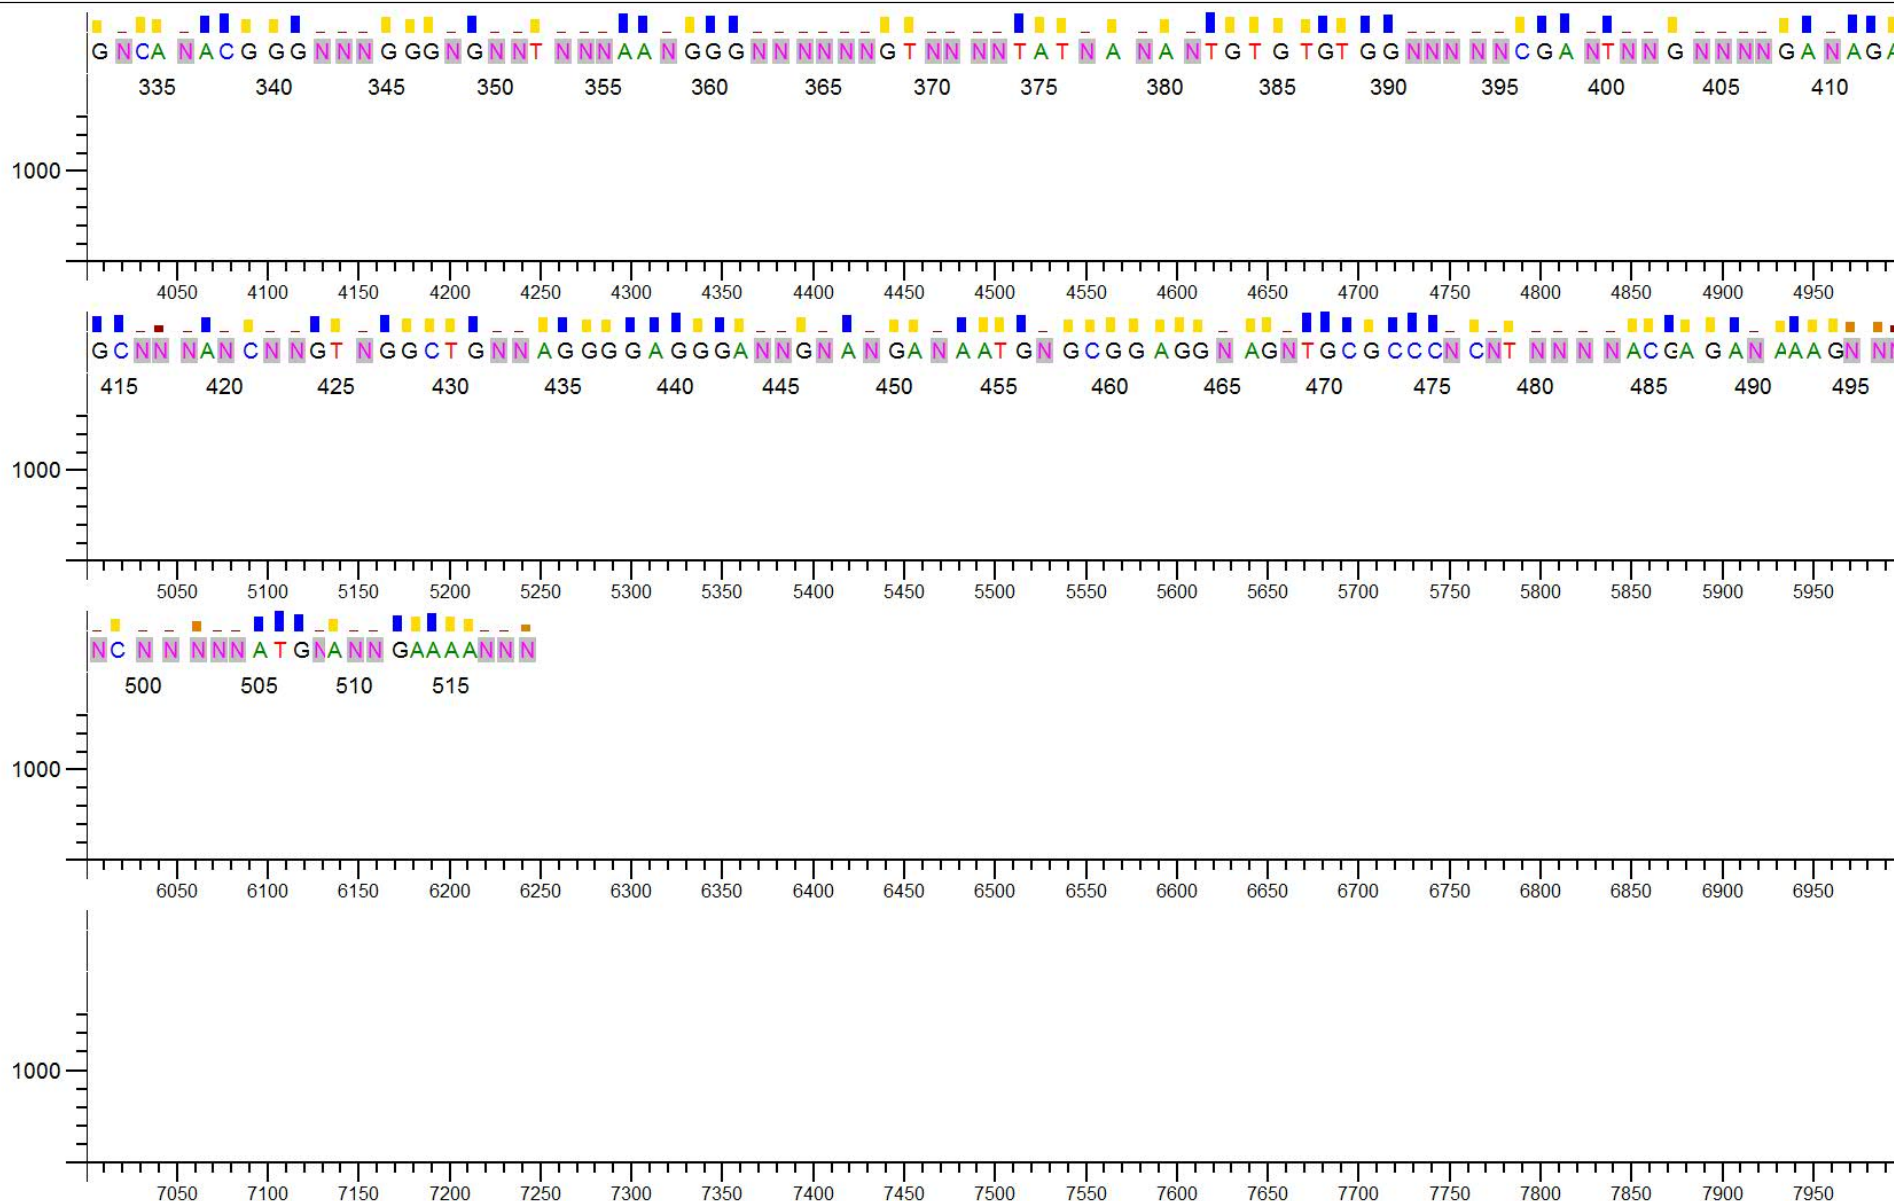

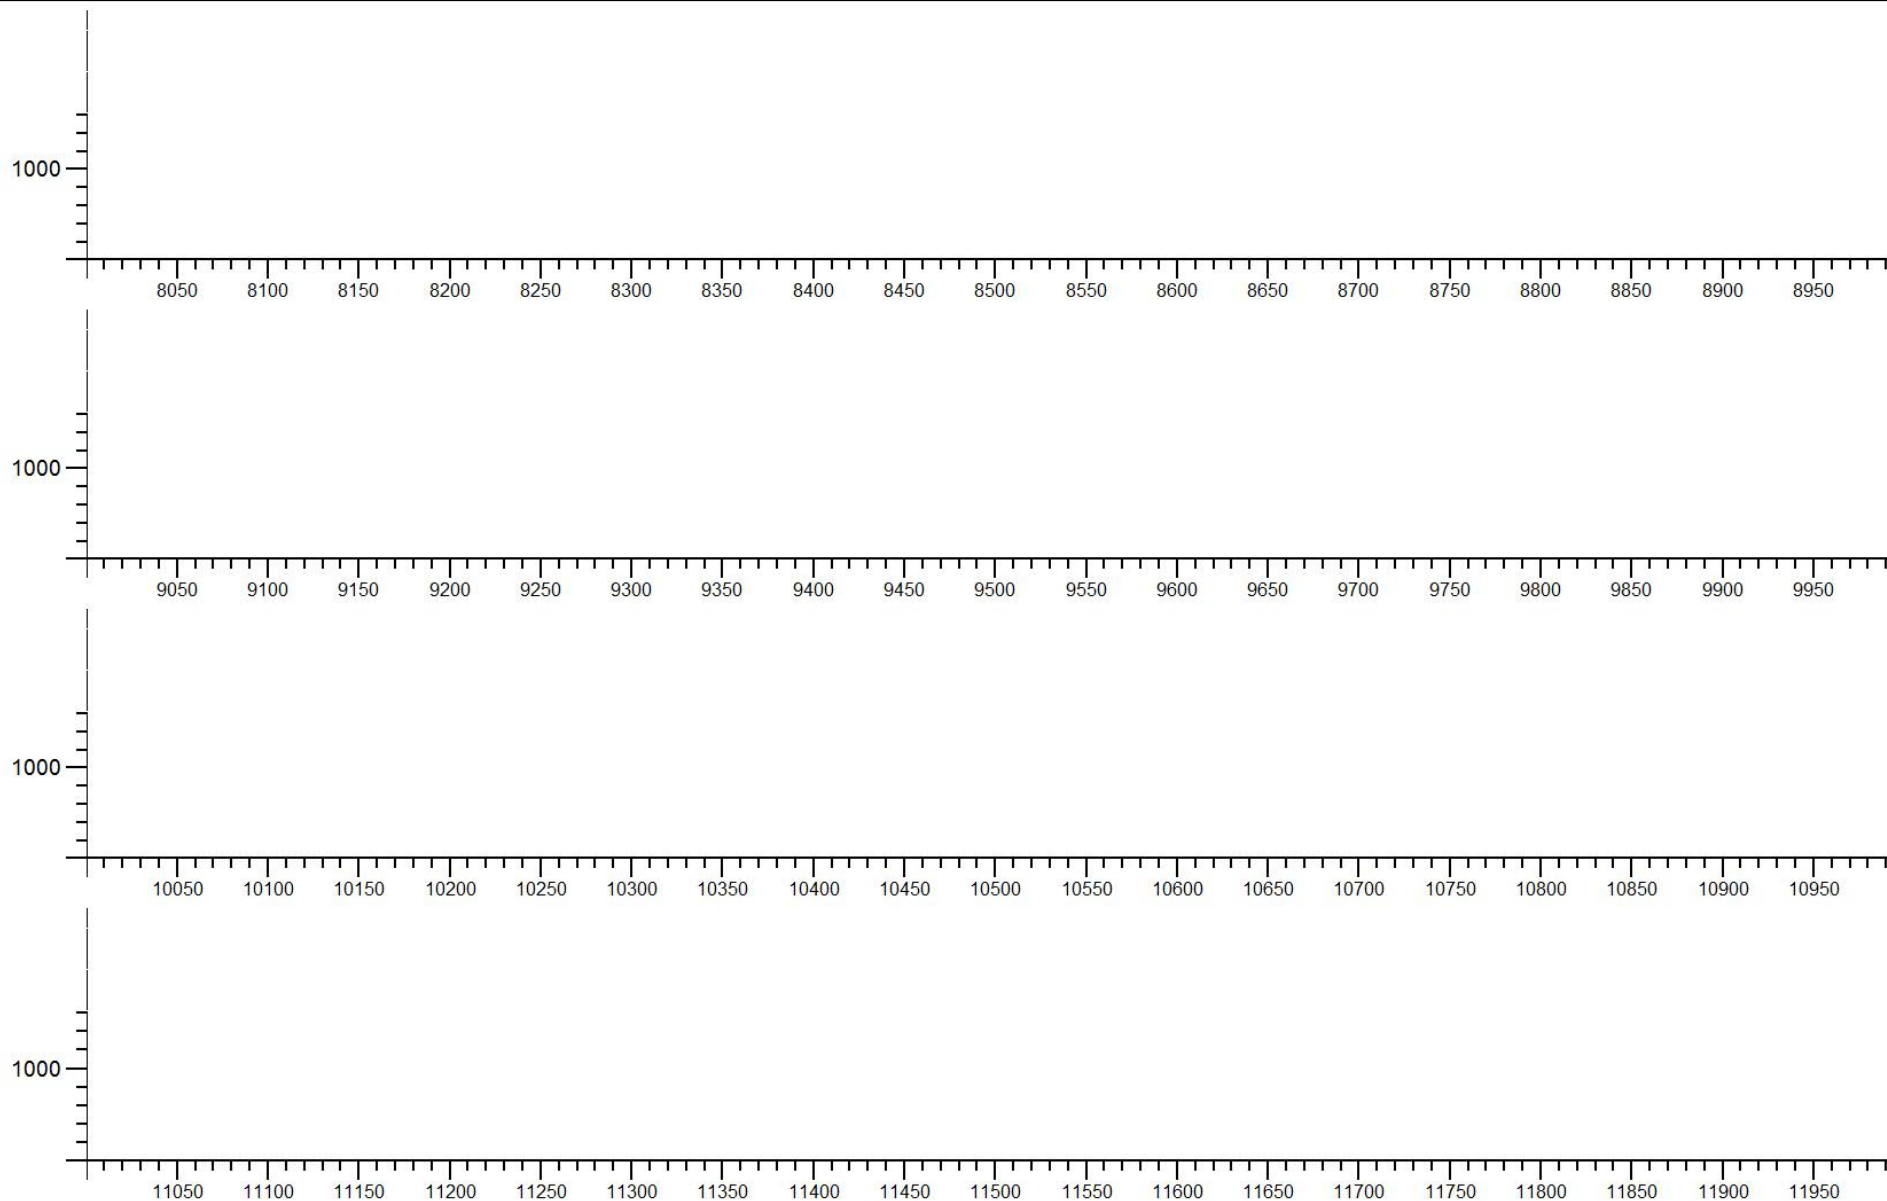

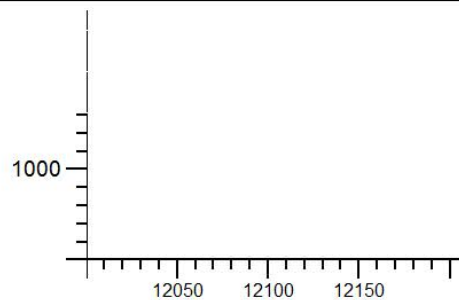

Supplement: raw_material.zip [file raw_material.zip]

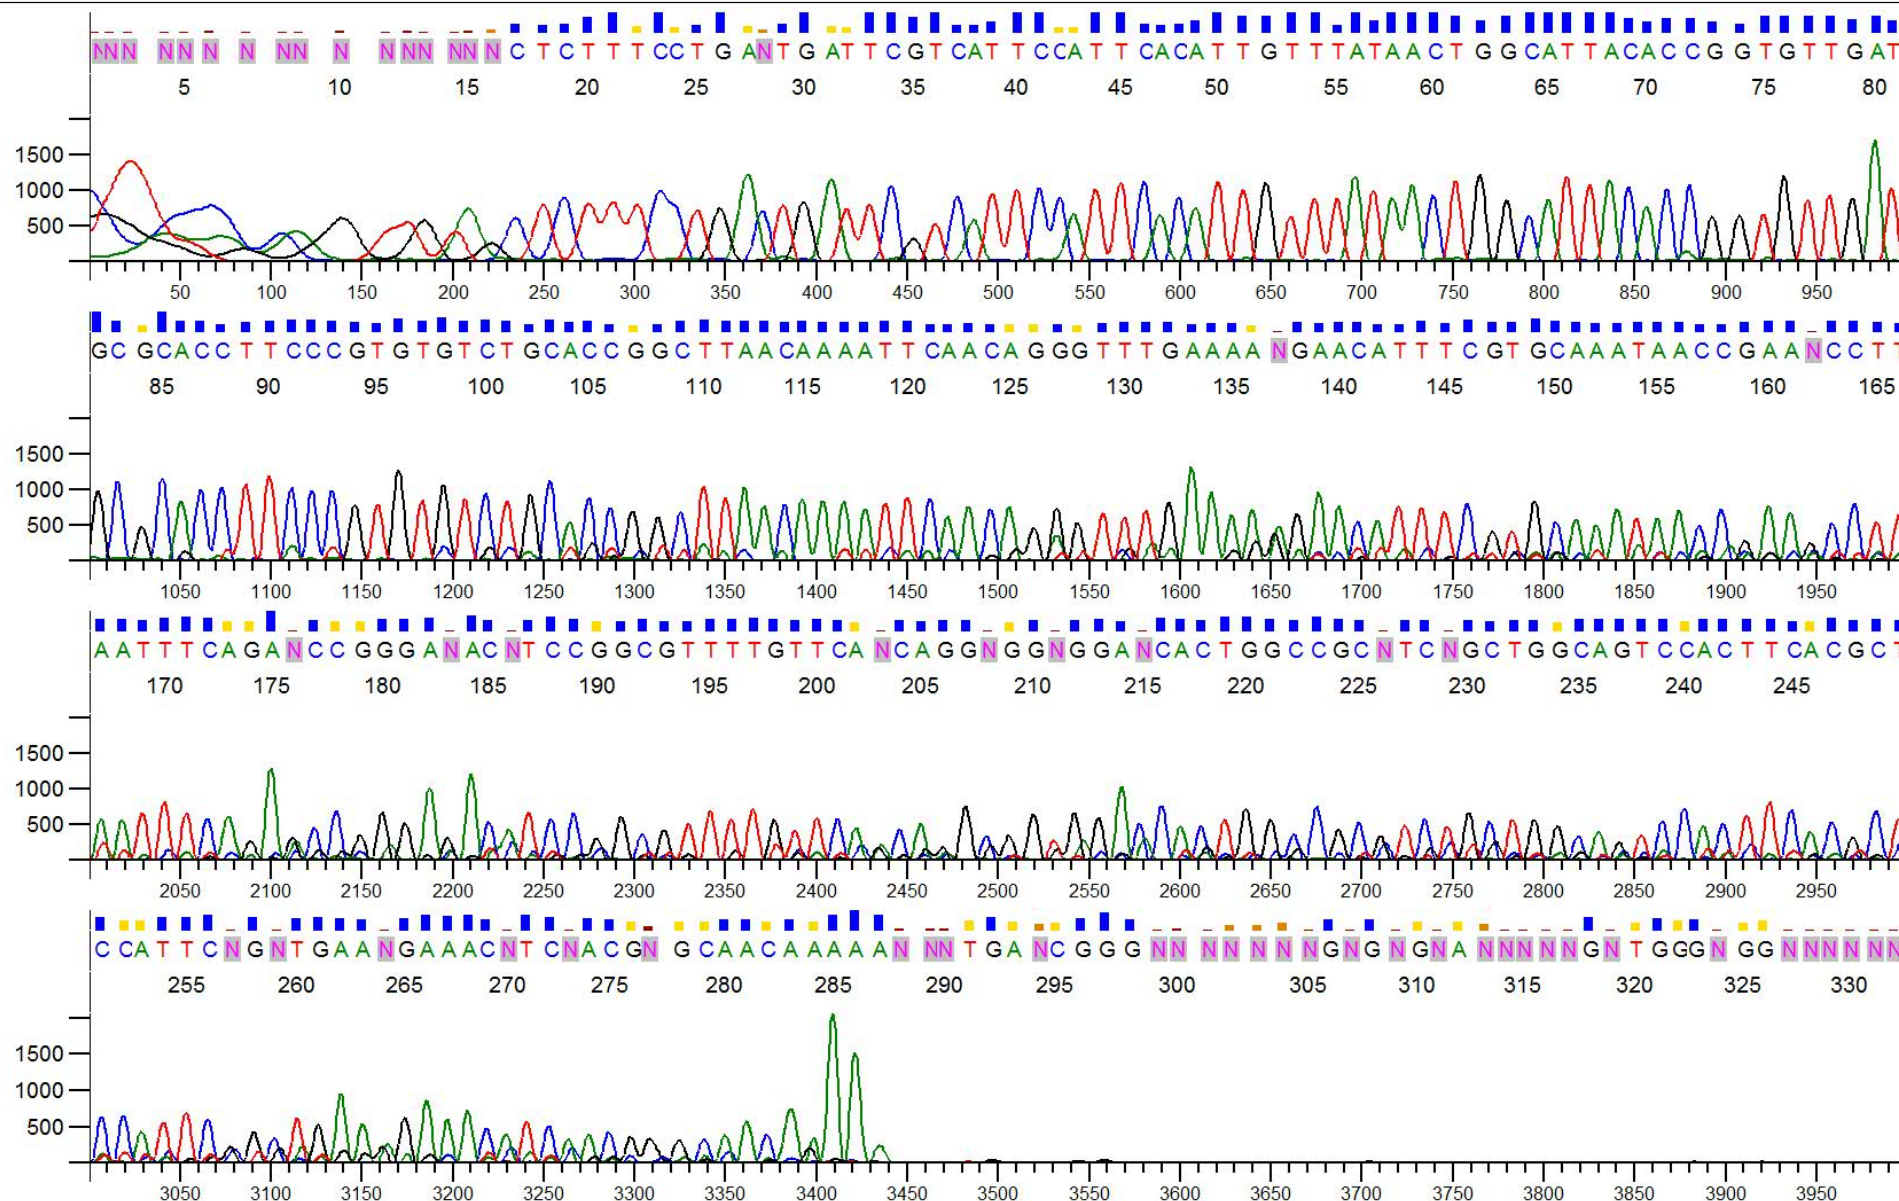

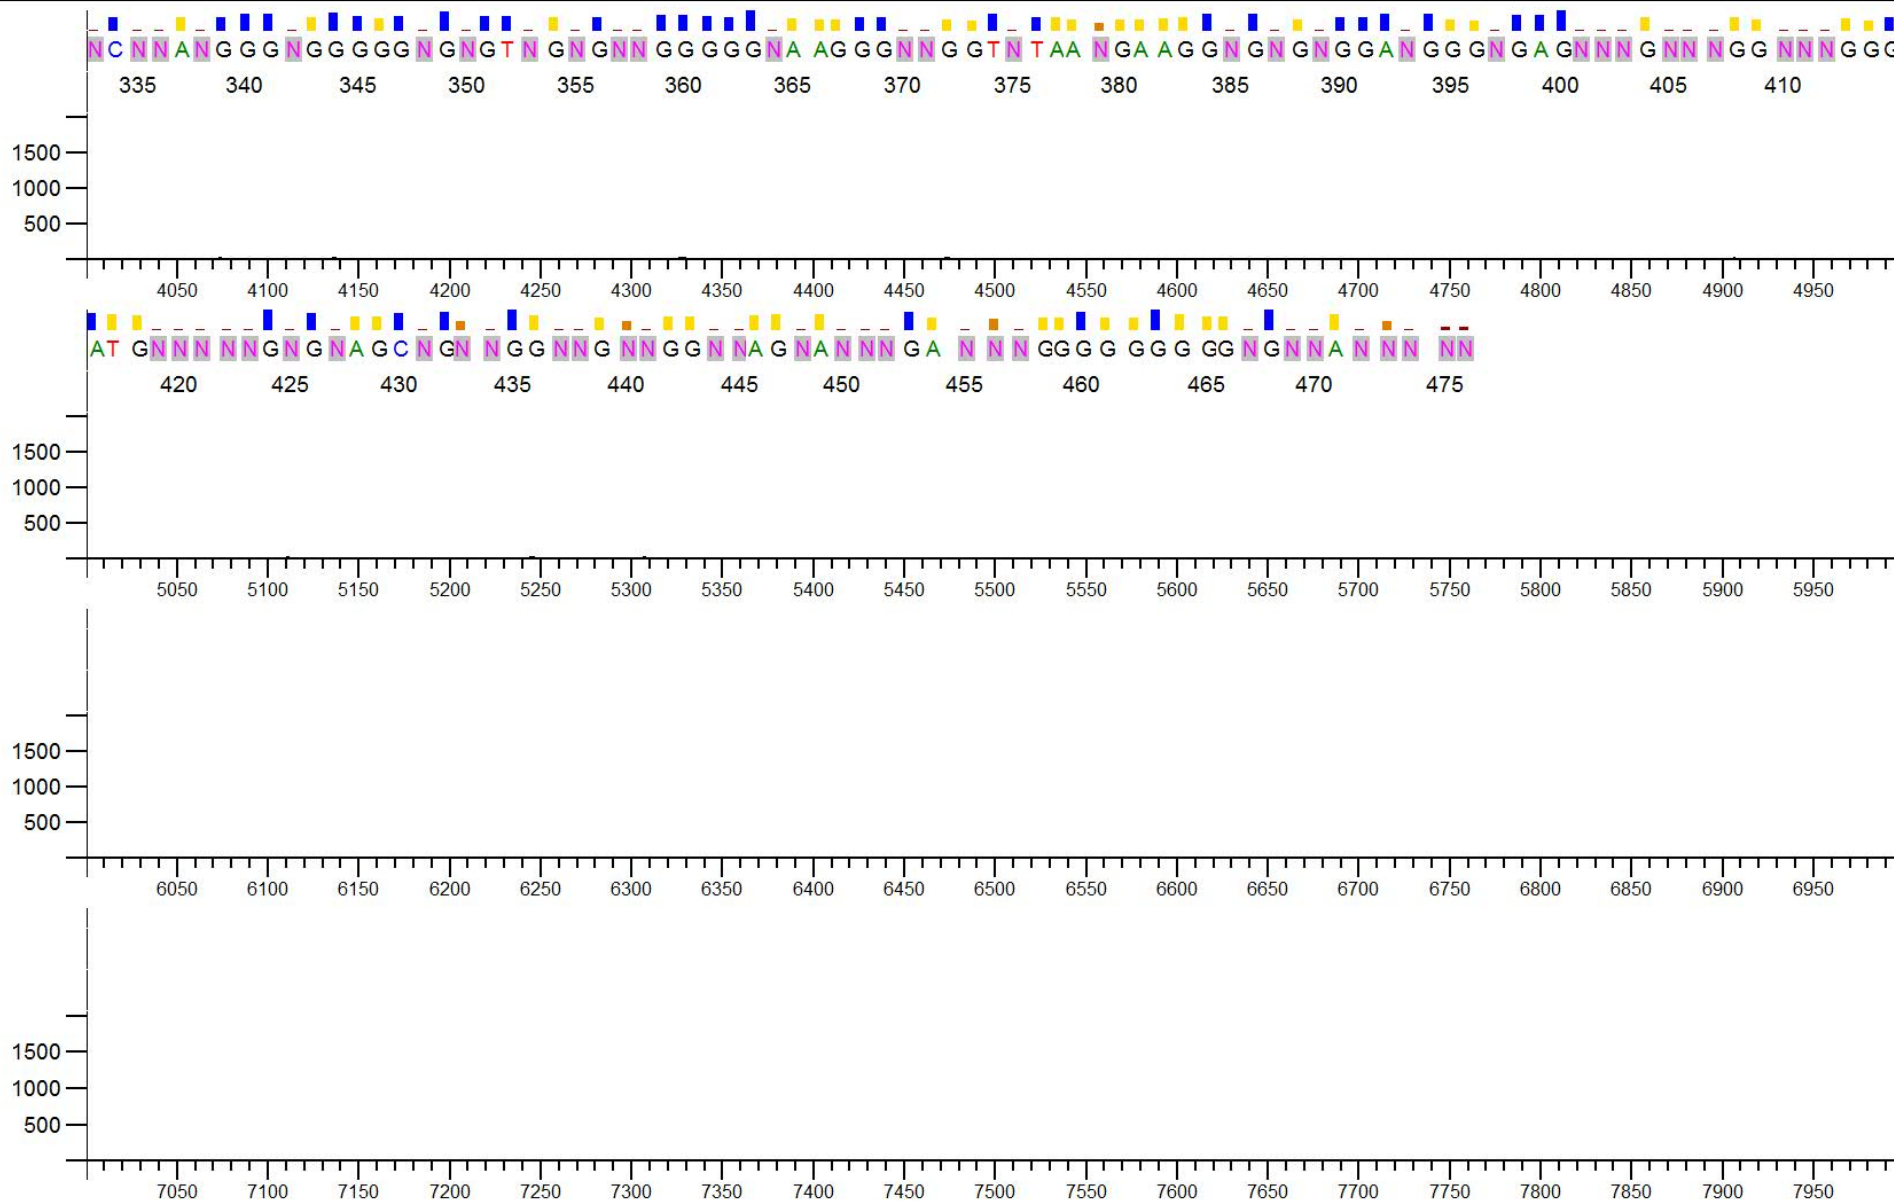

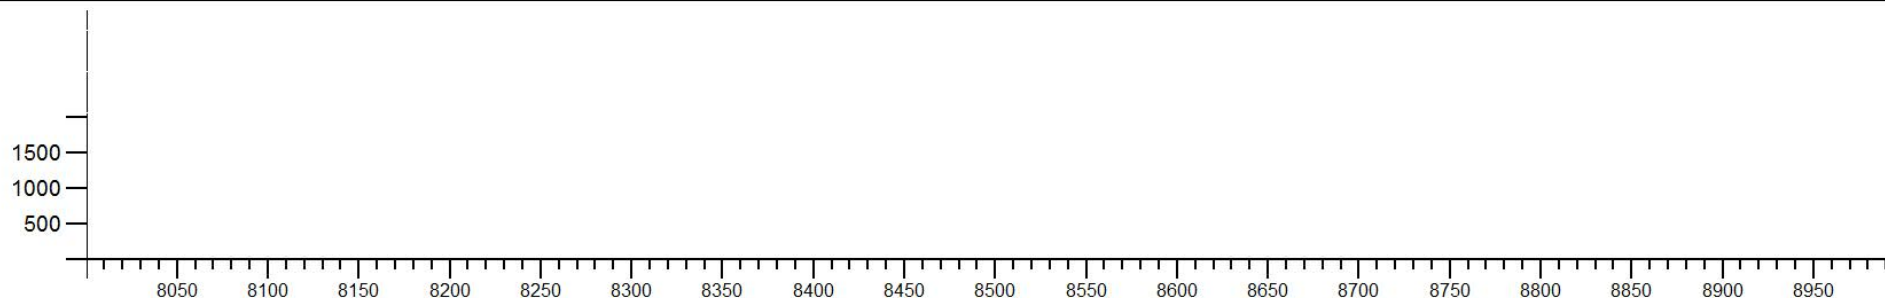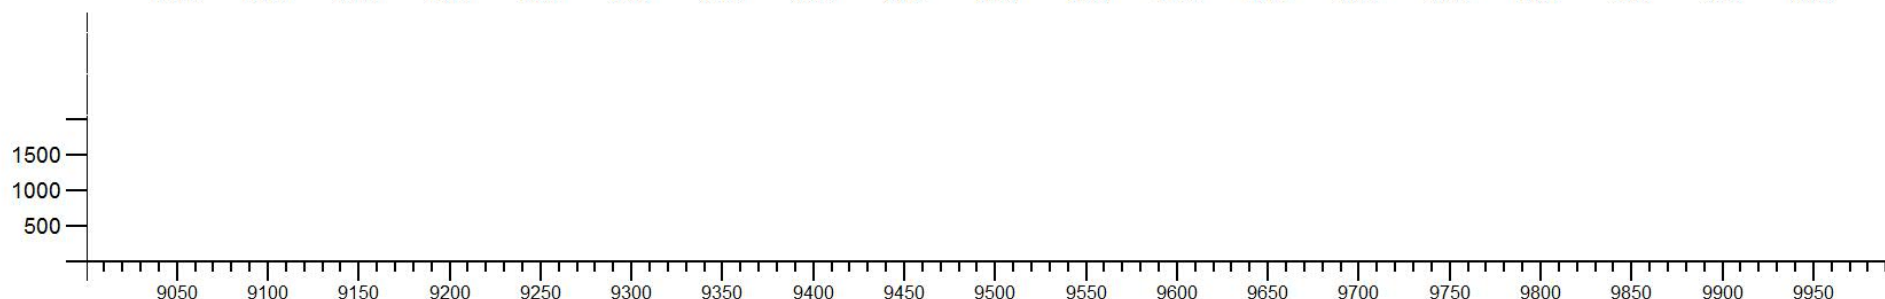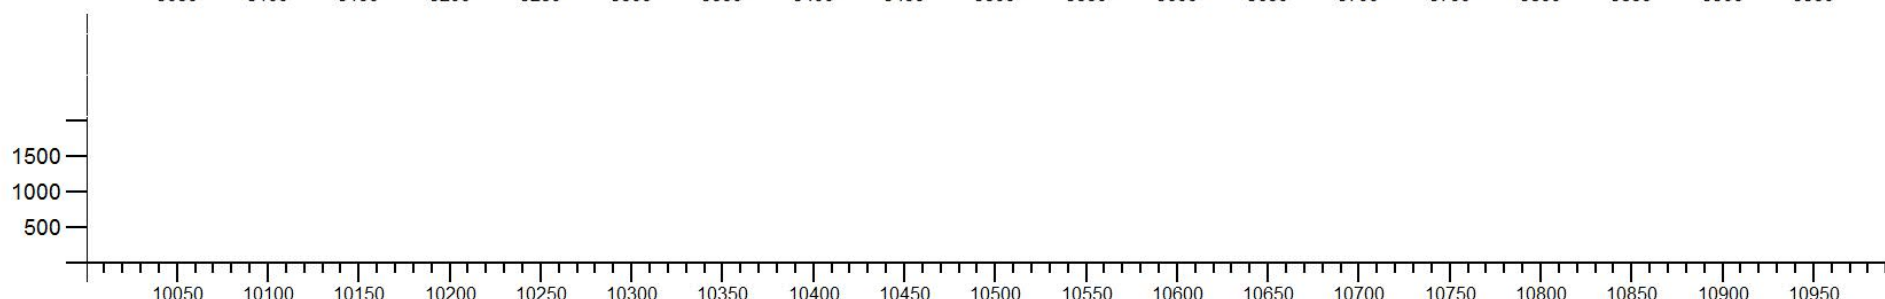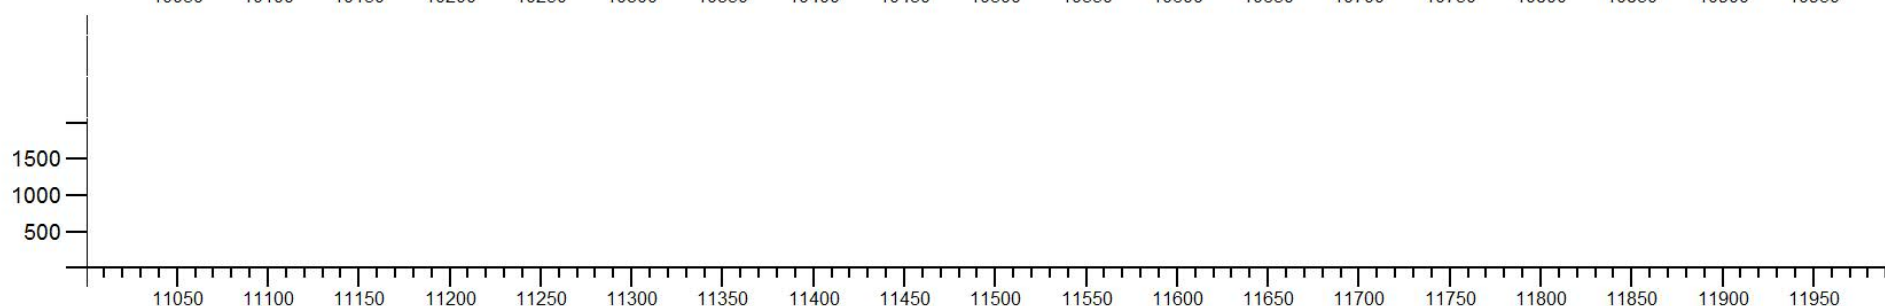

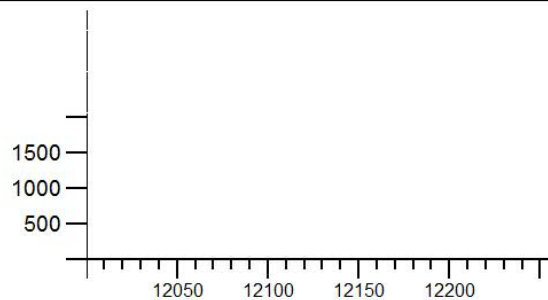

Supplement: raw_material.zip [file raw_material.zip]

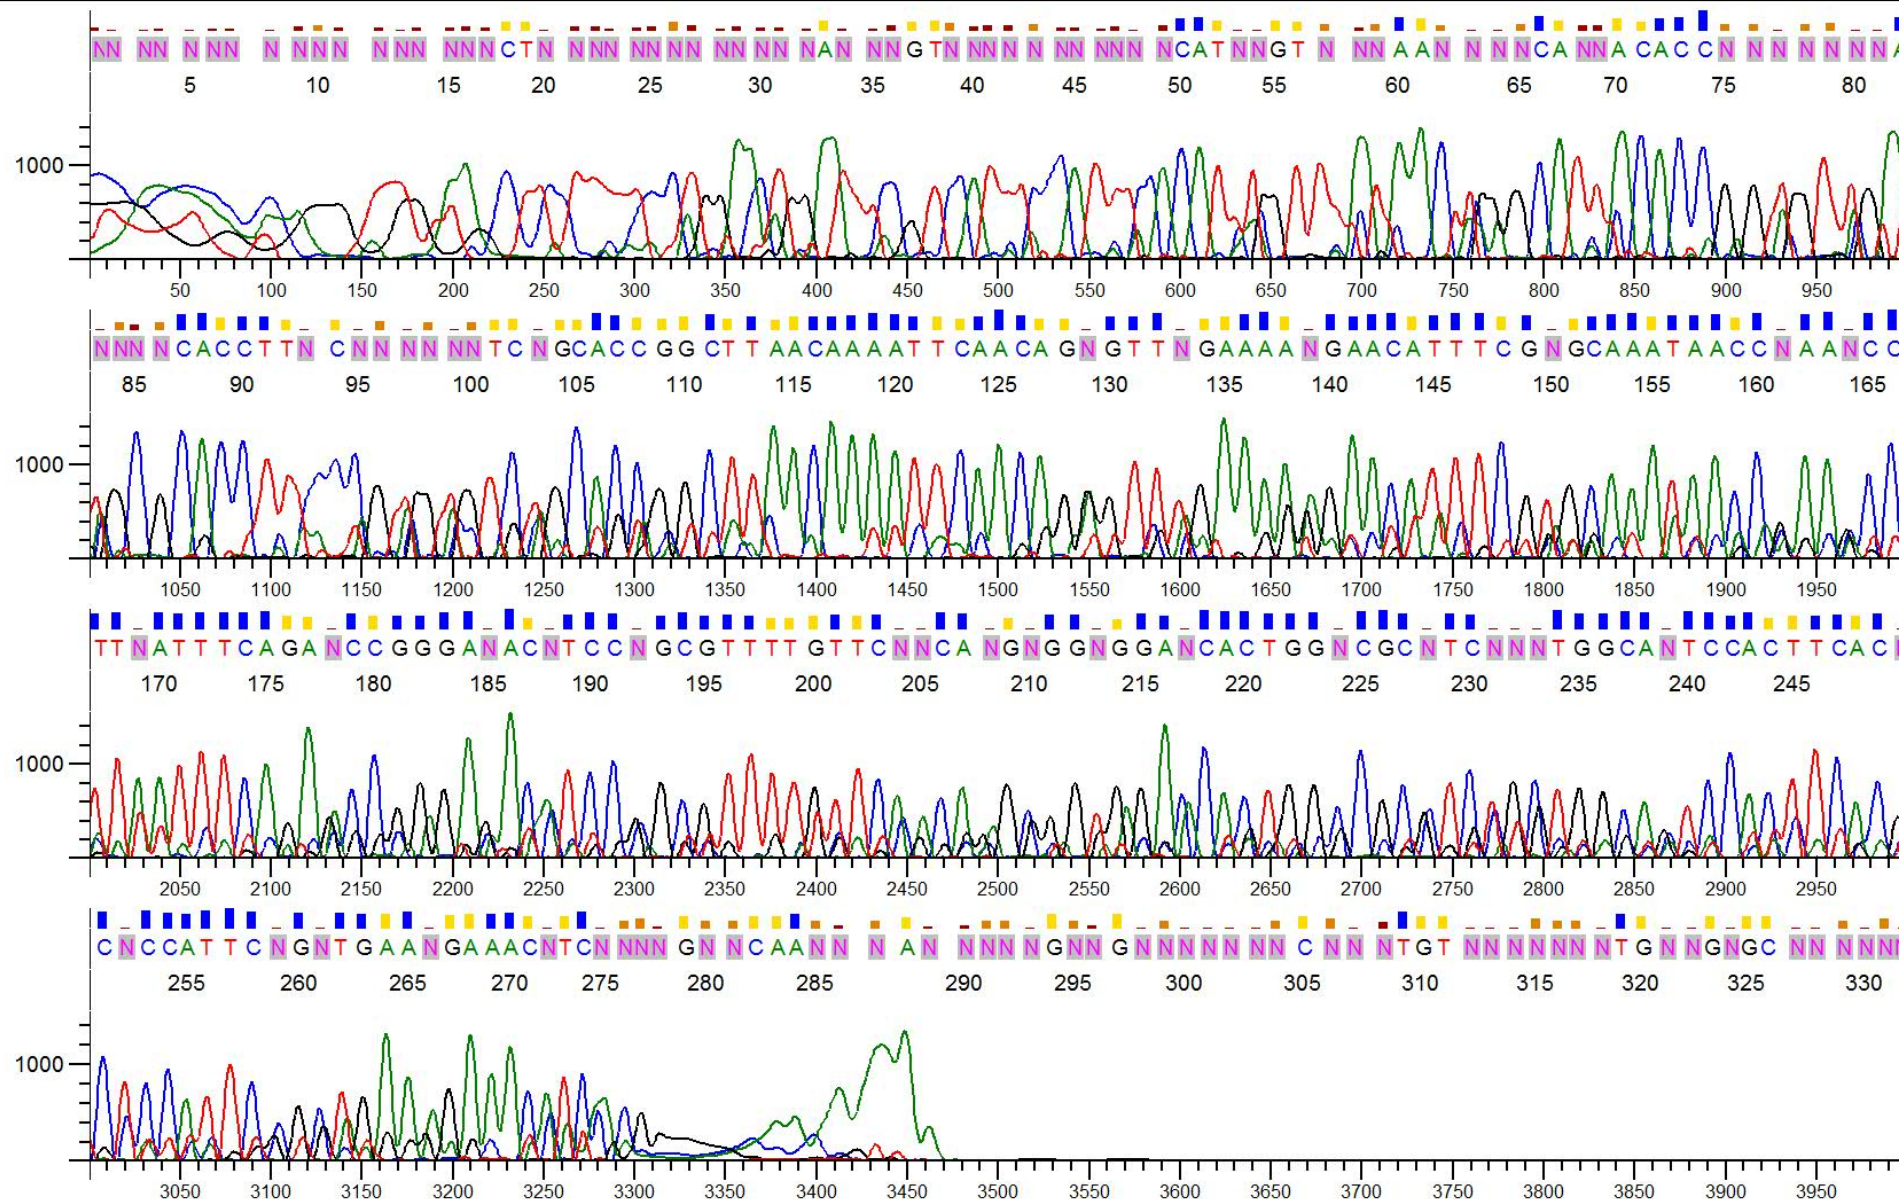

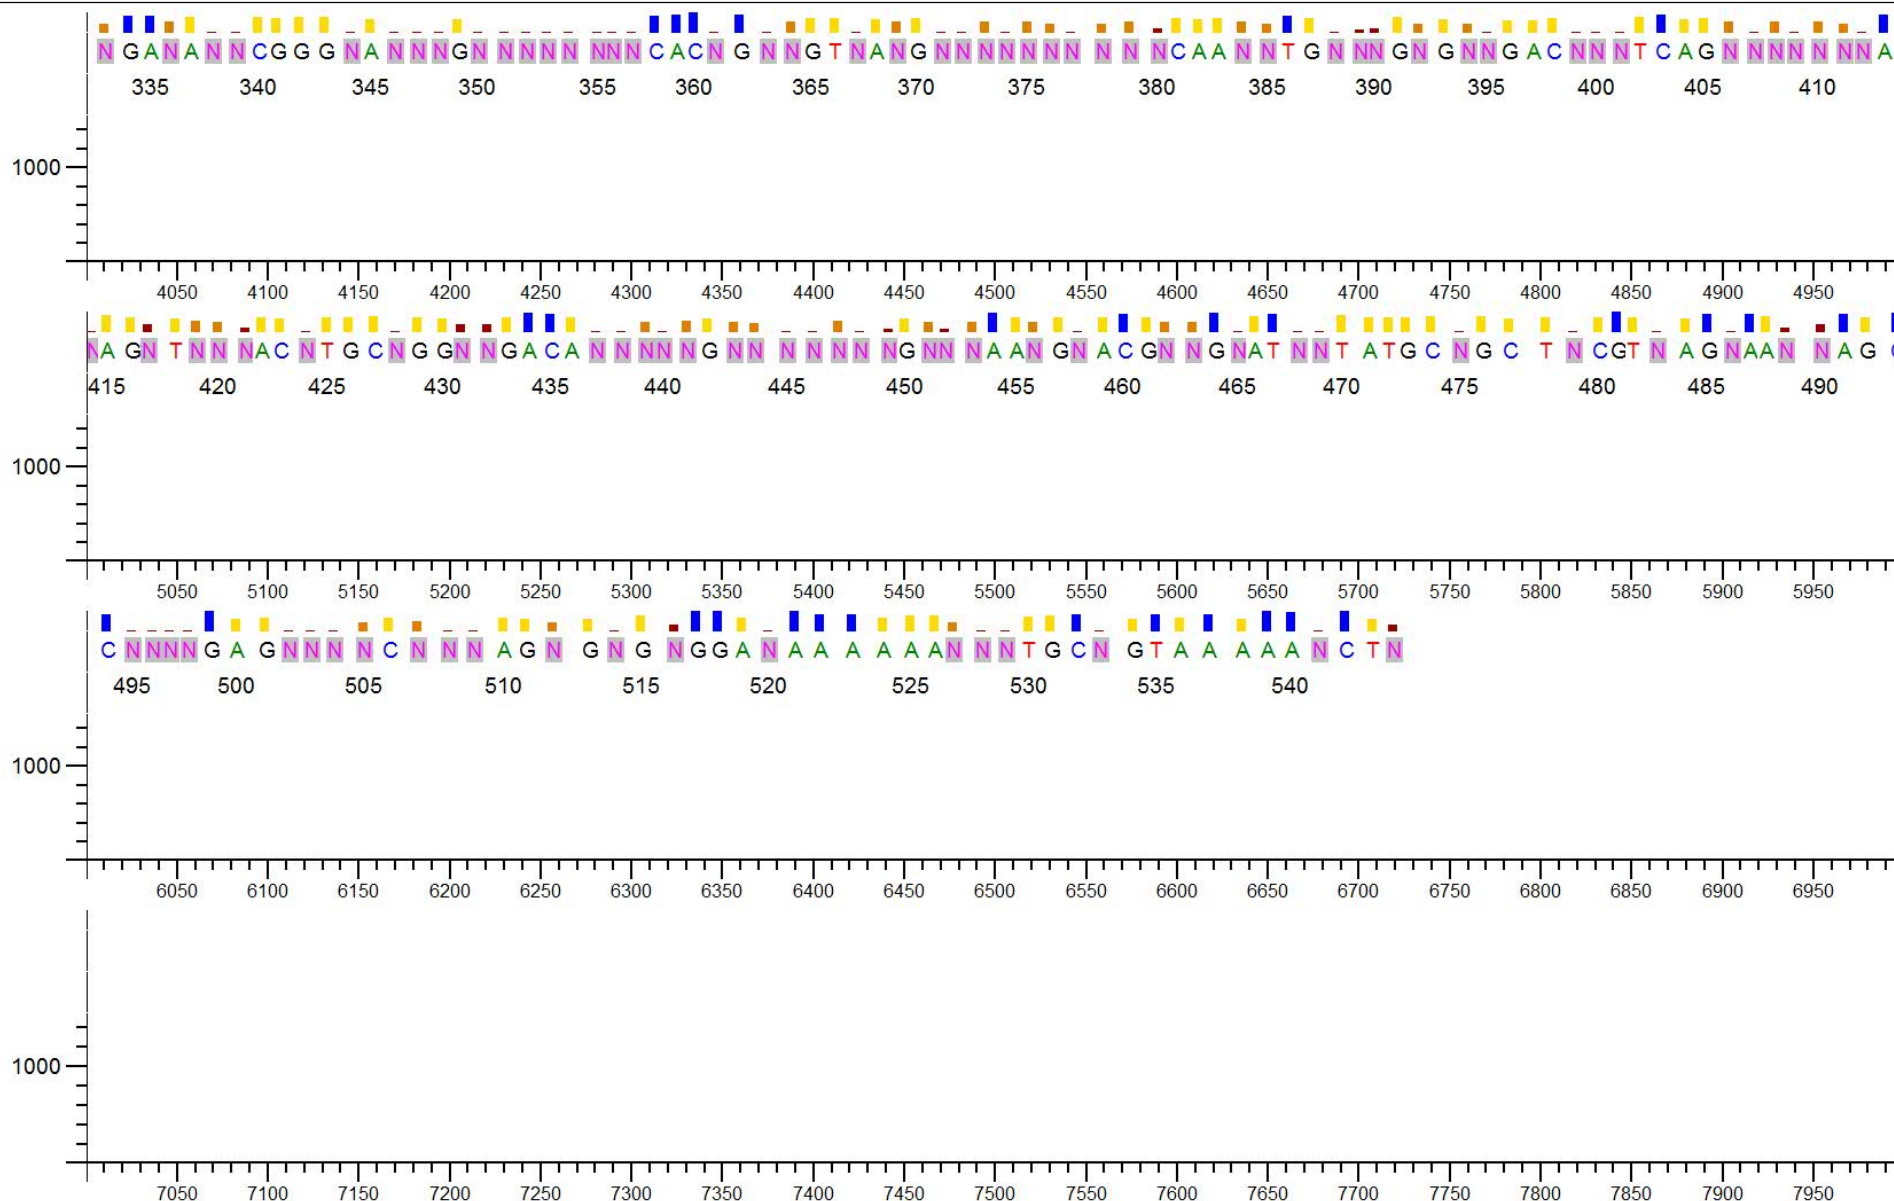



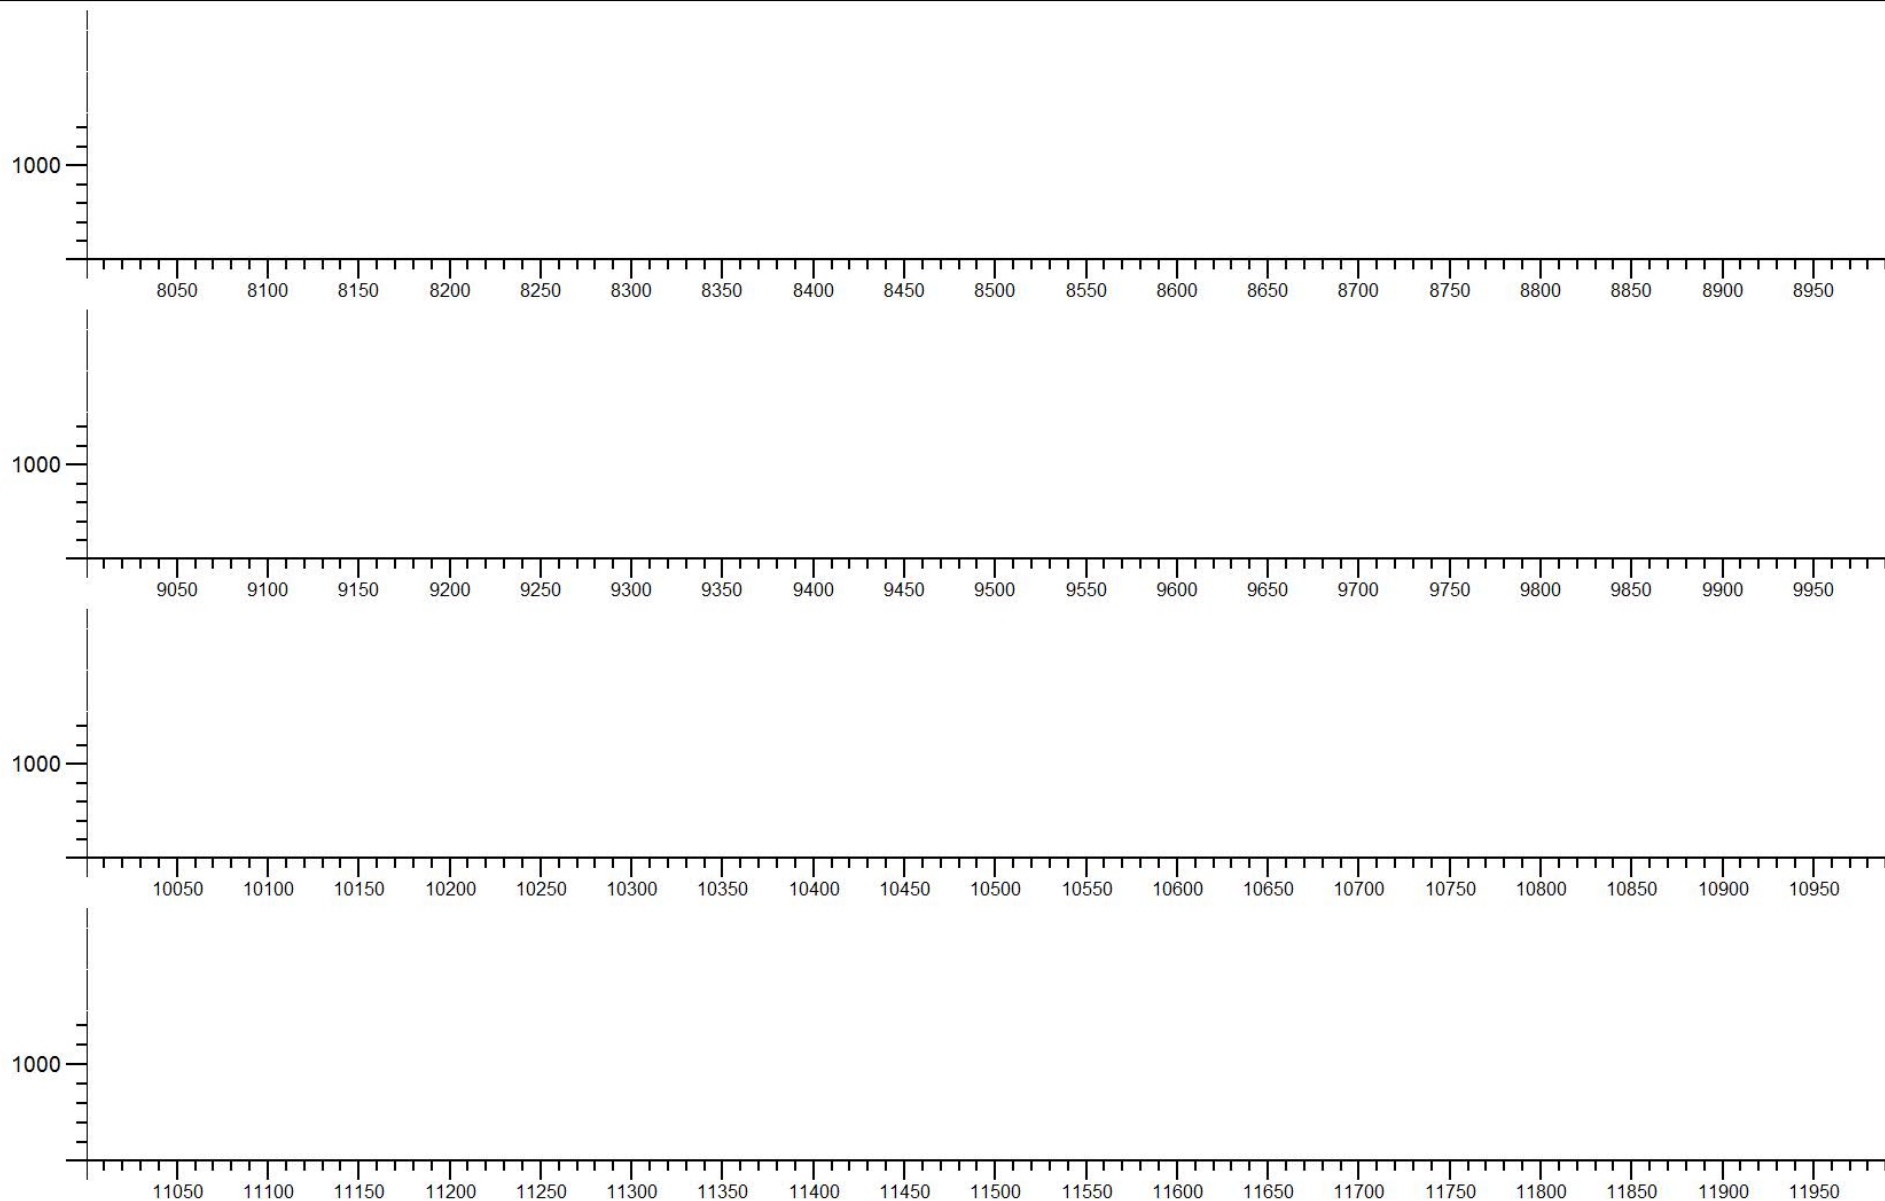

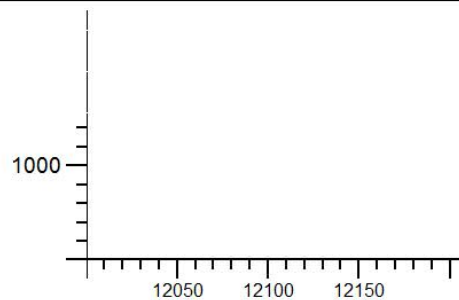

Supplement: raw_material.zip [file raw_material.zip]

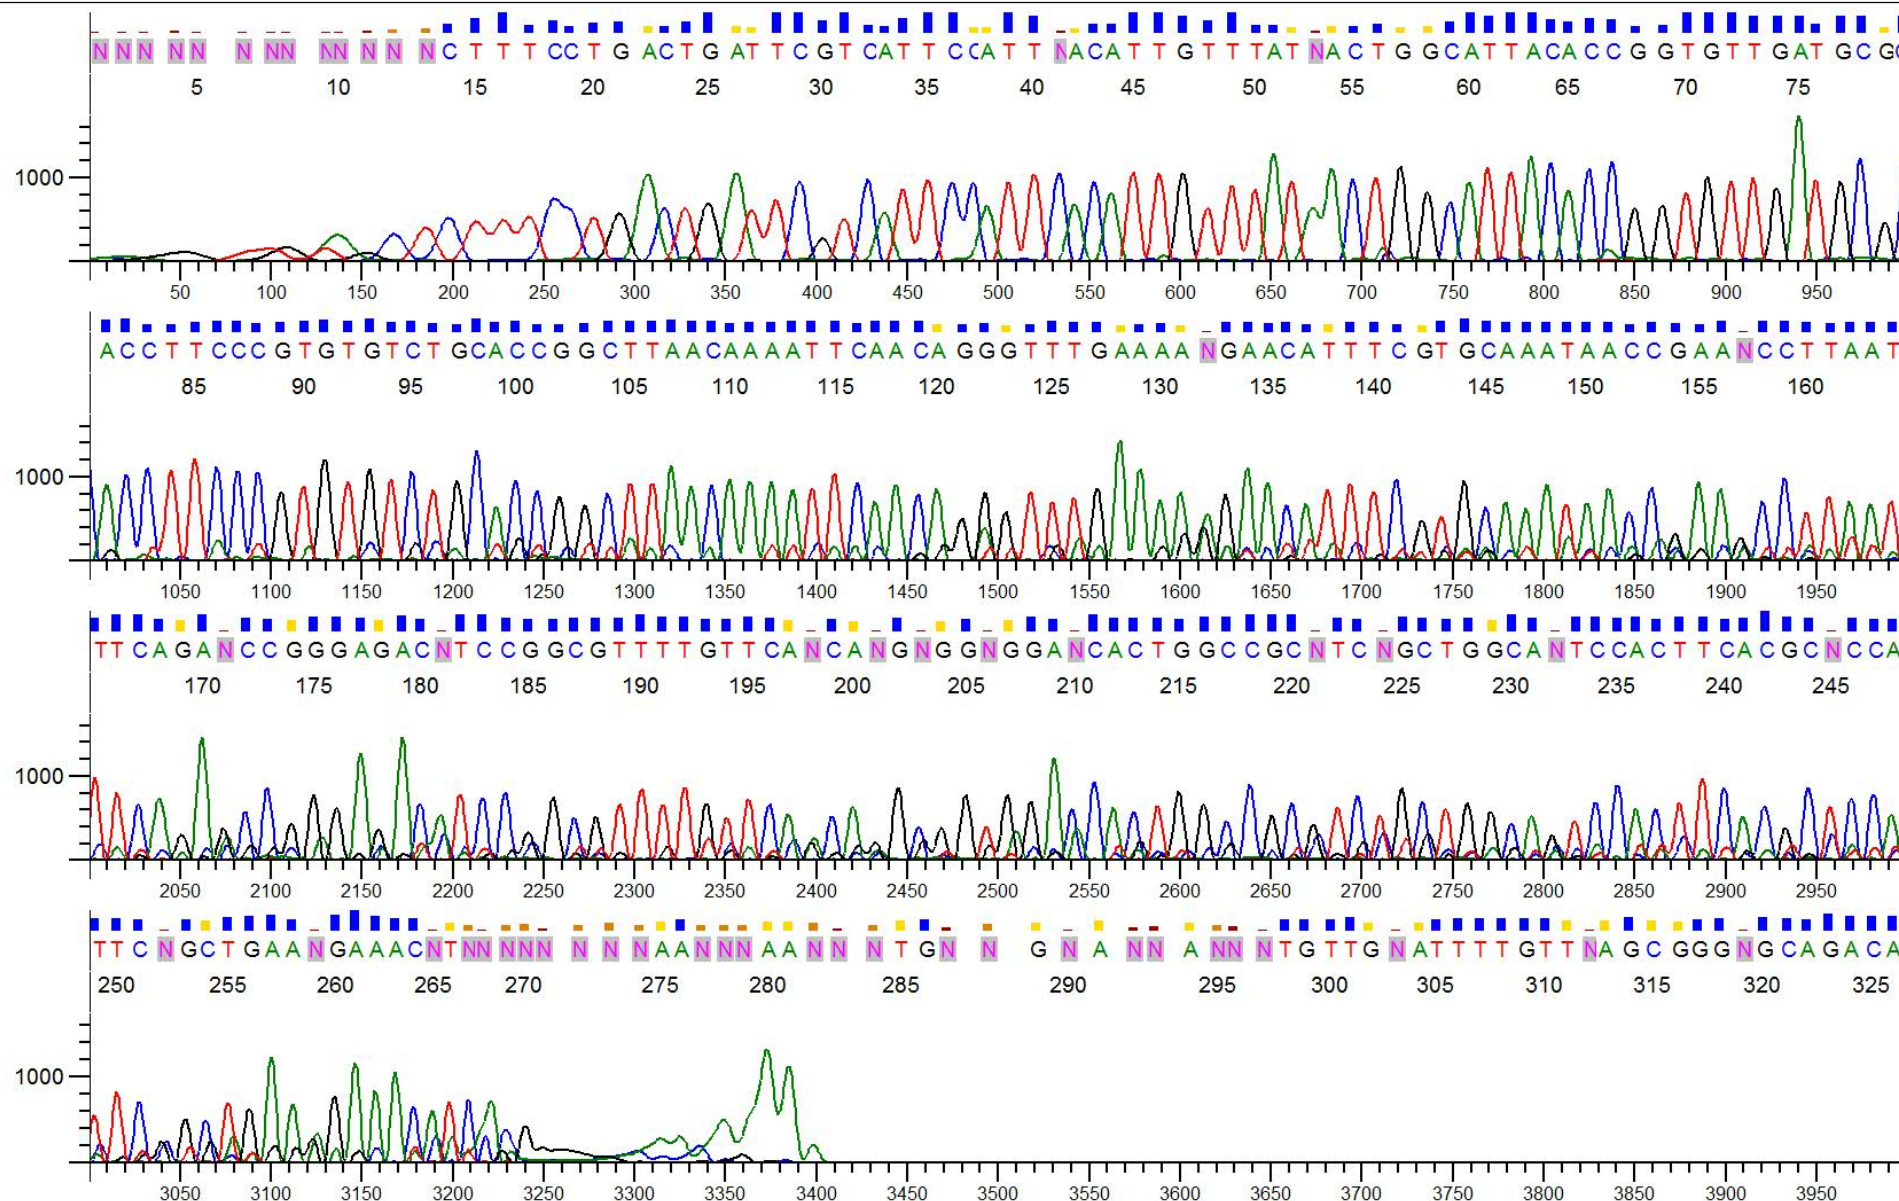

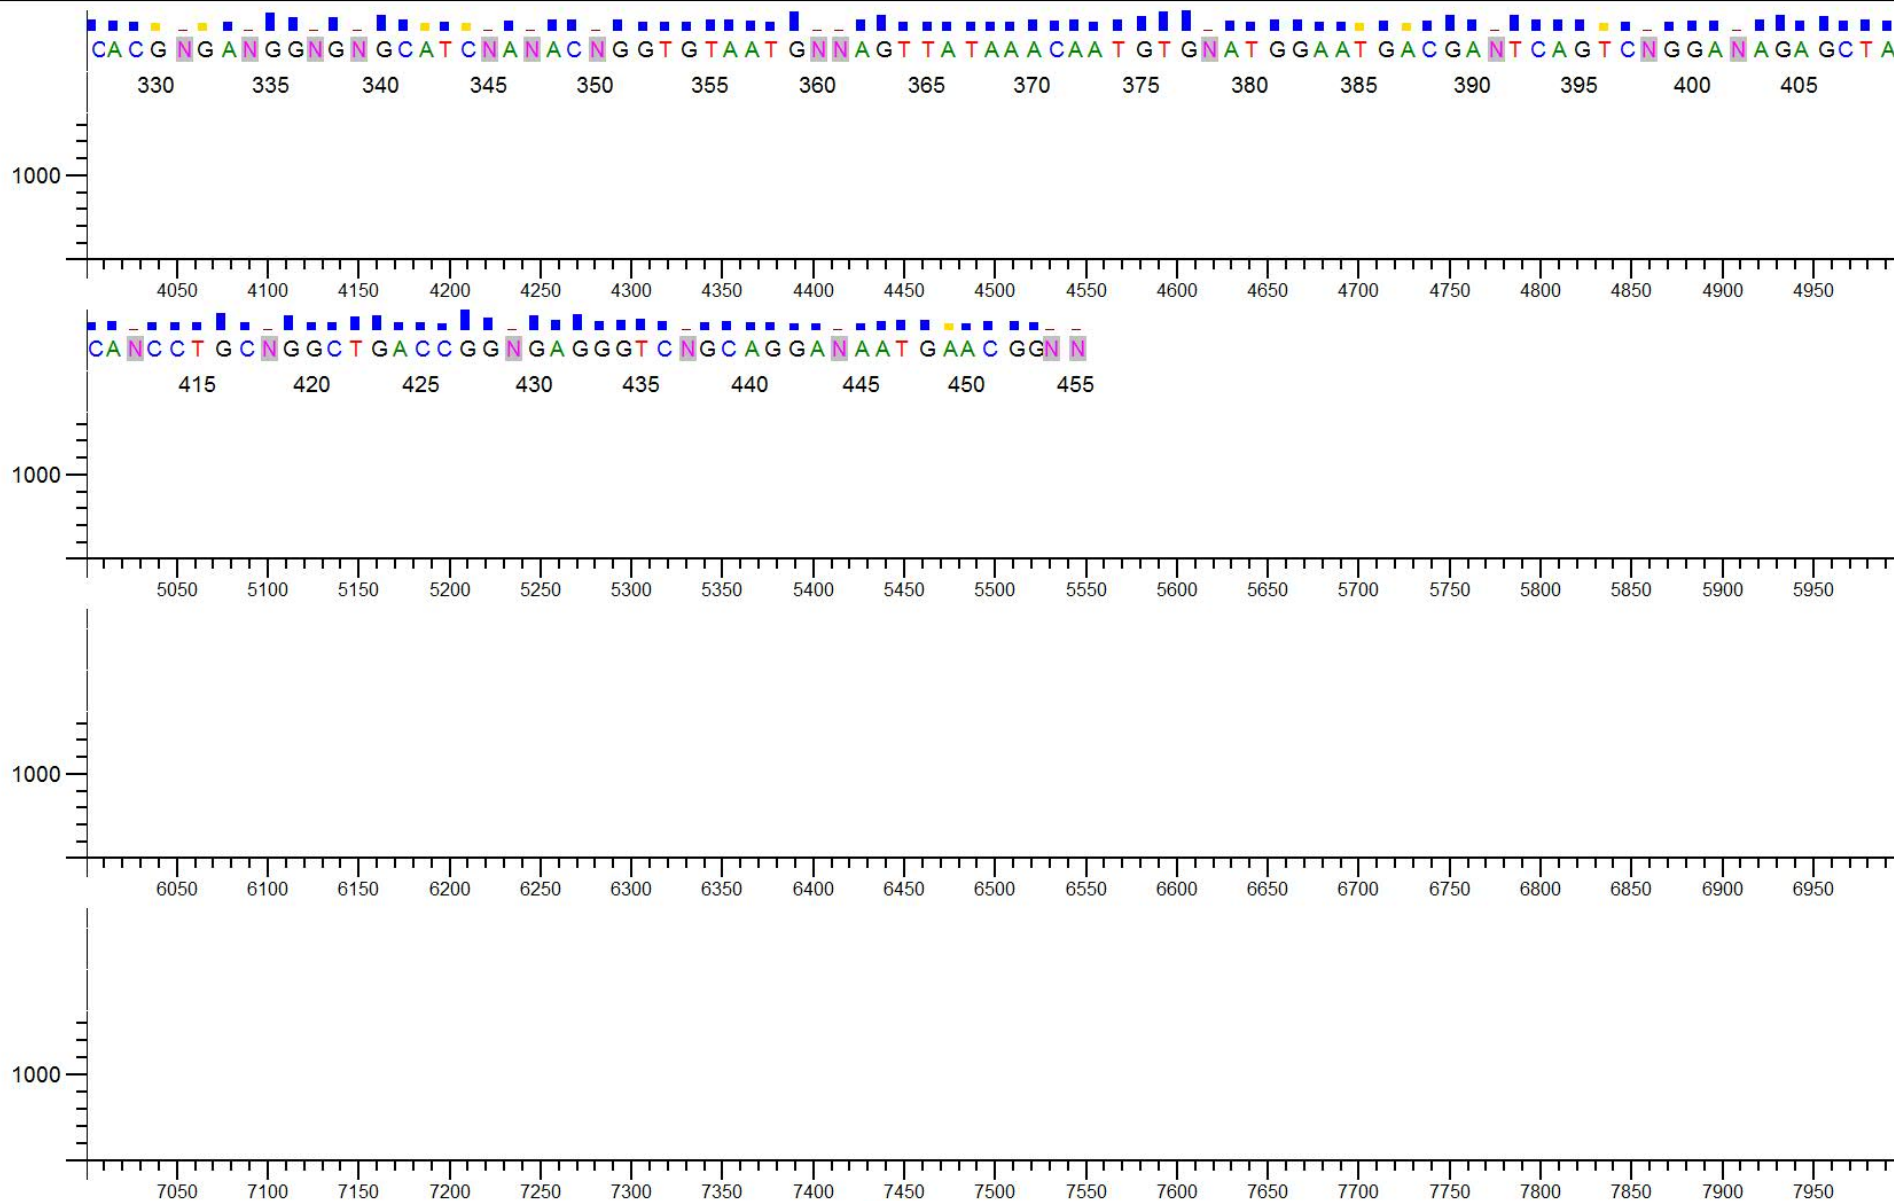

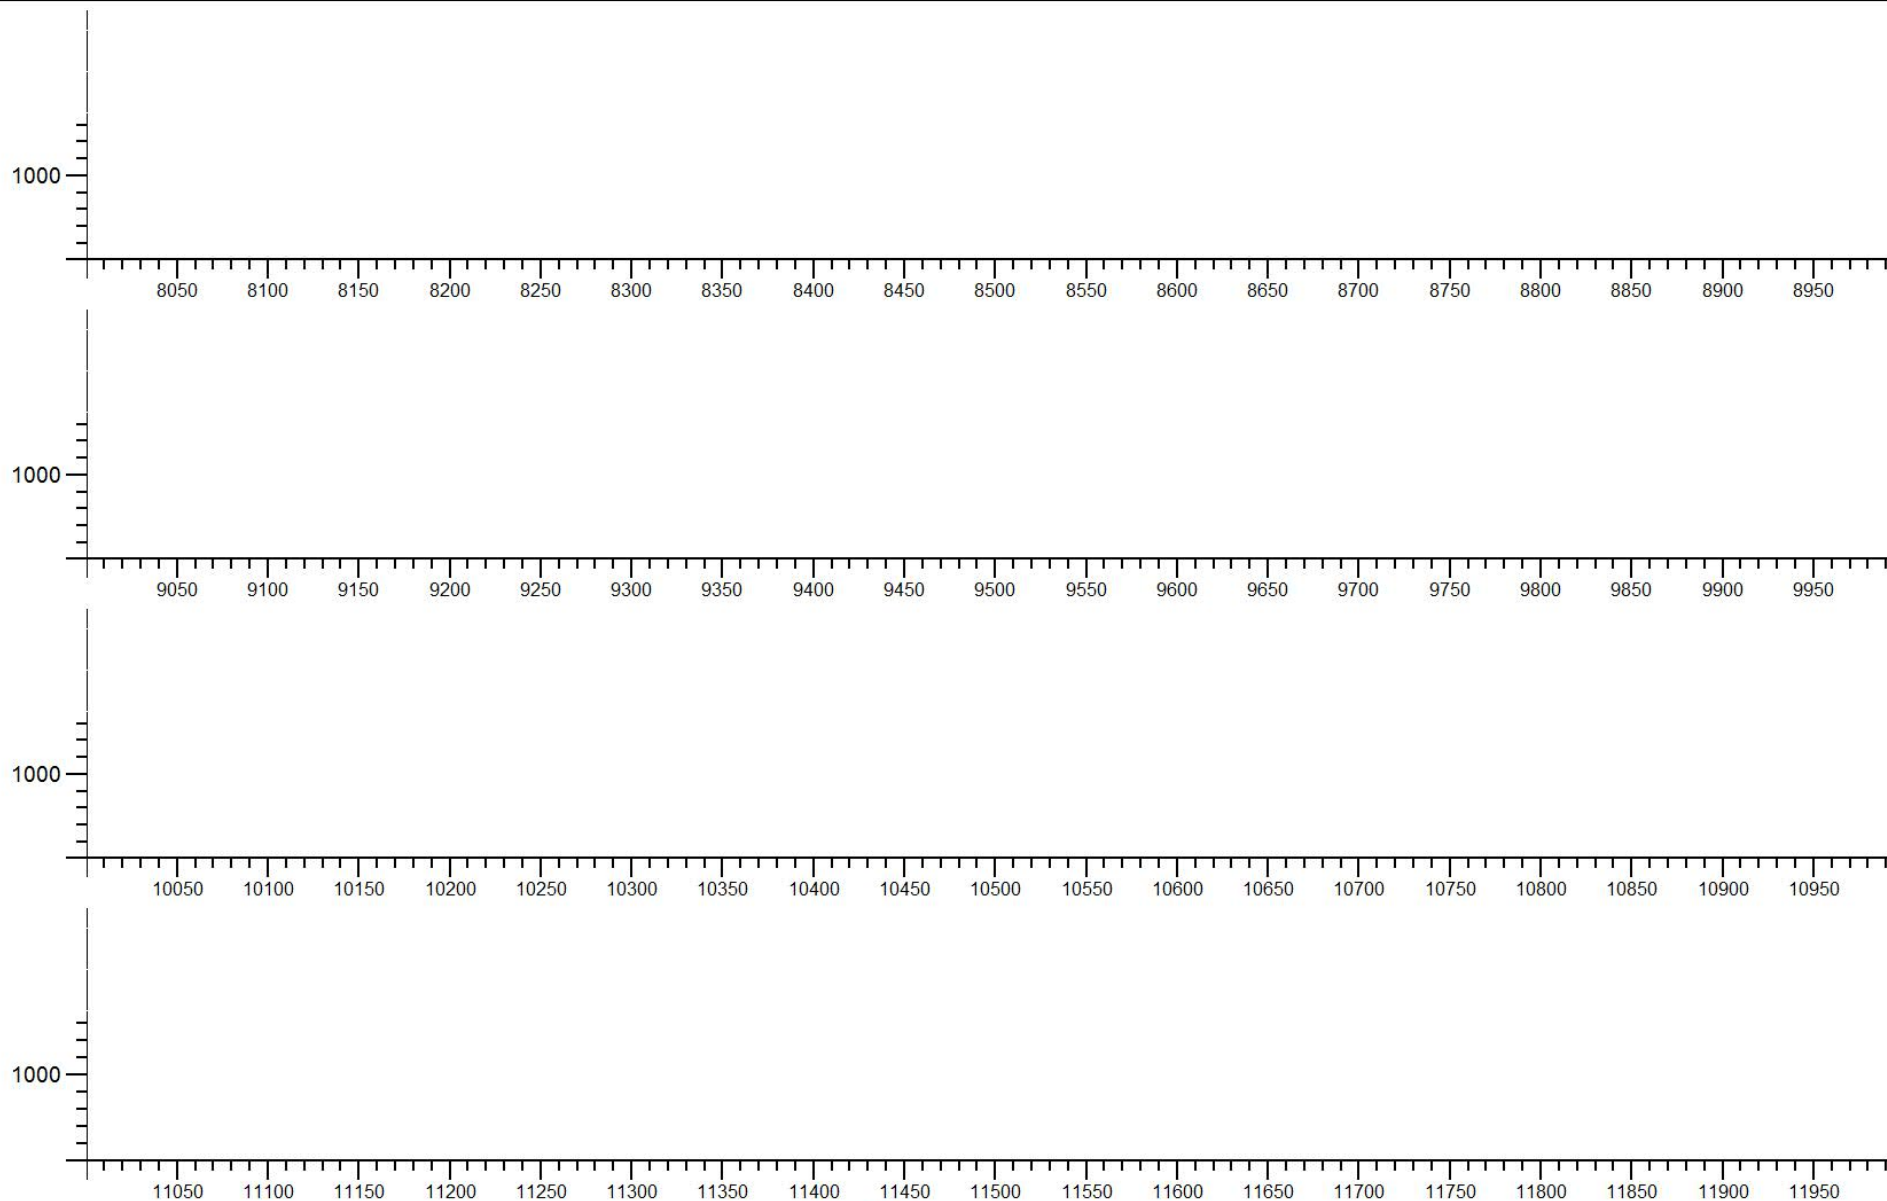



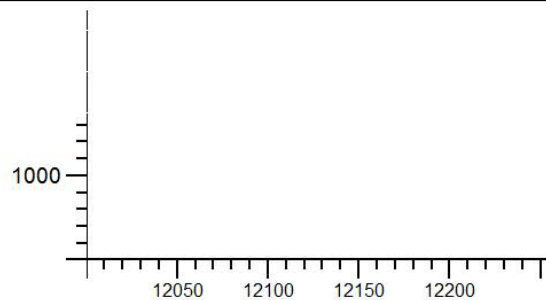

Supplement: raw_material.zip [file raw_material.zip]

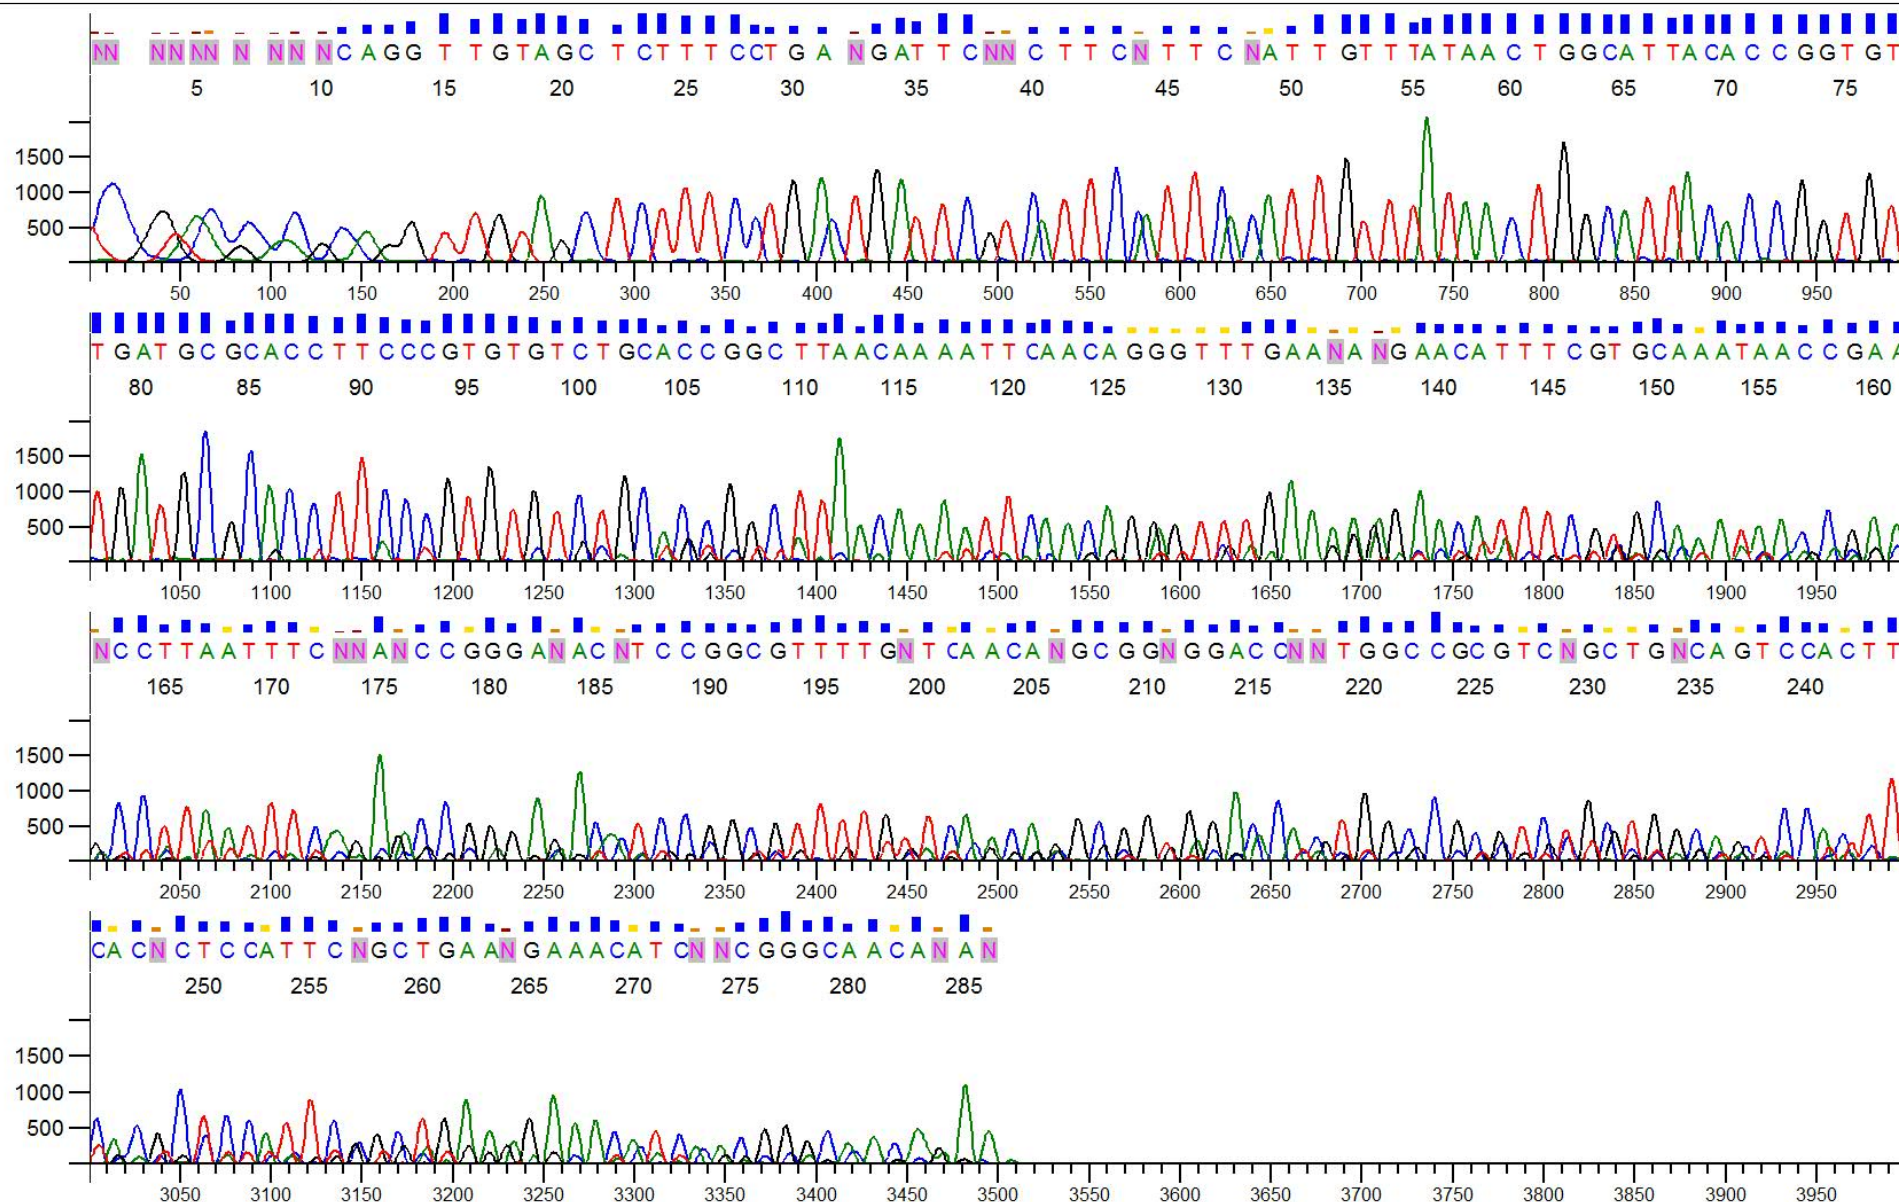

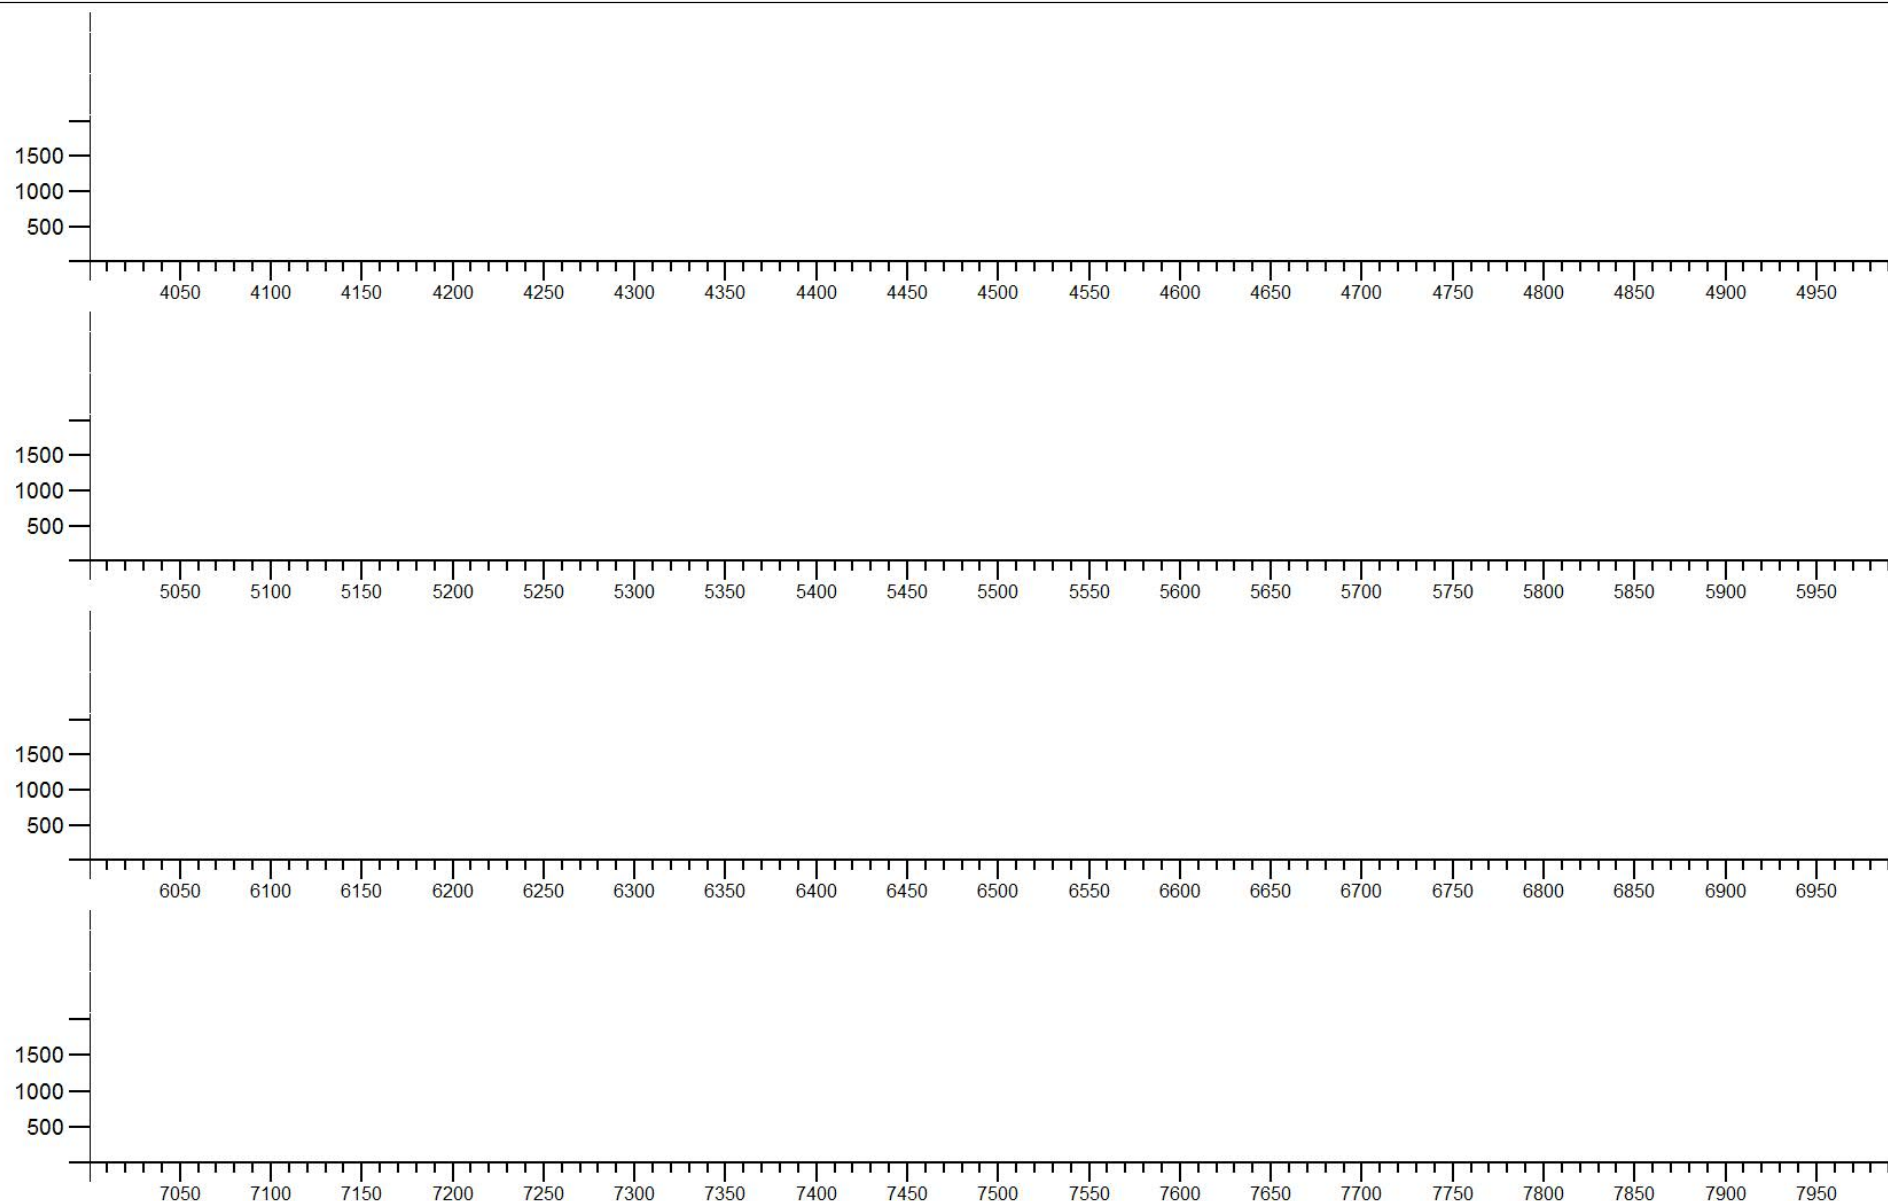

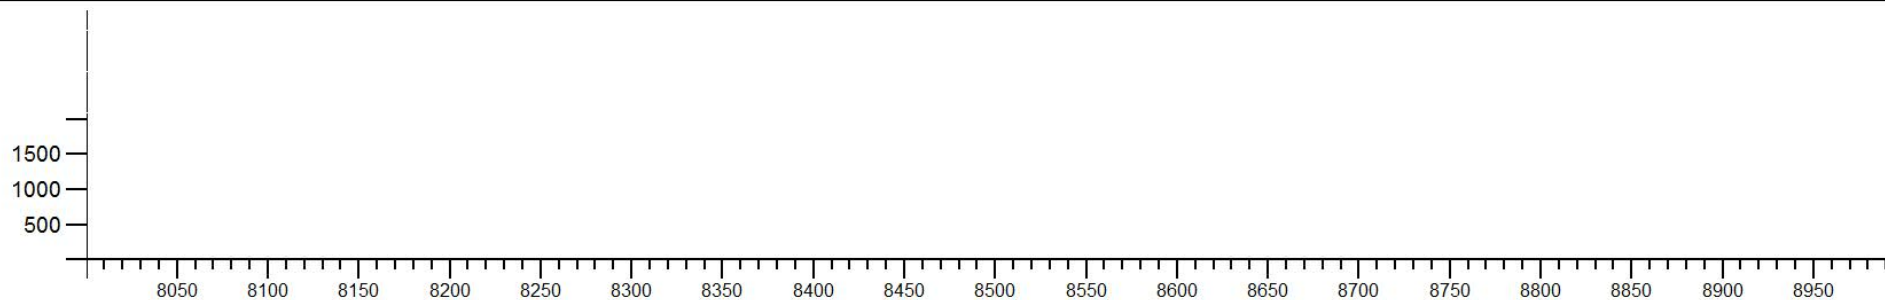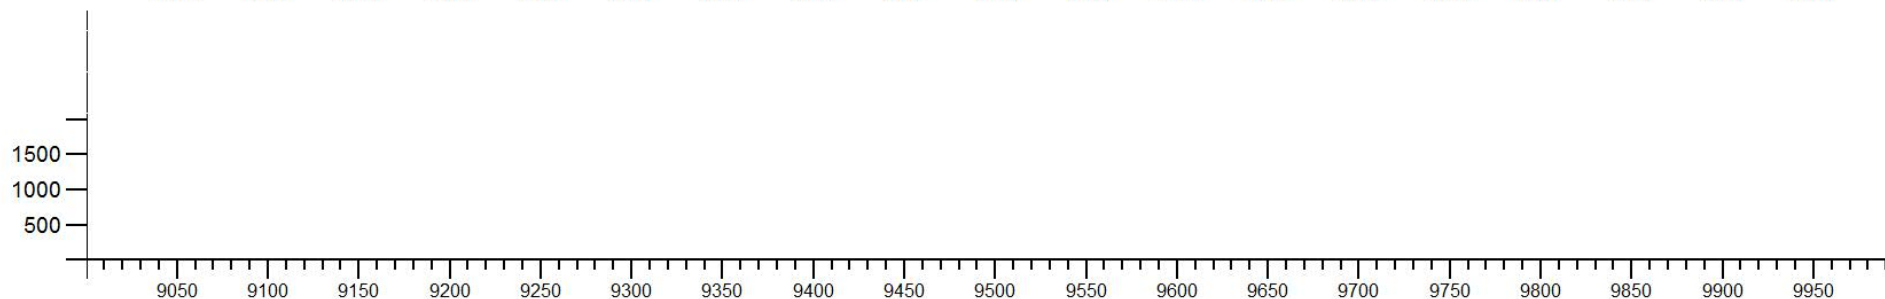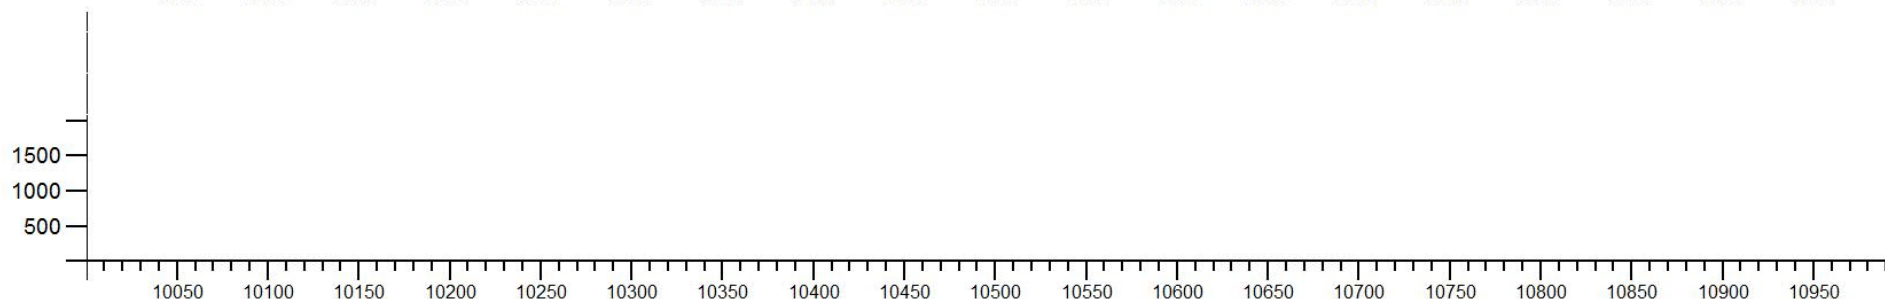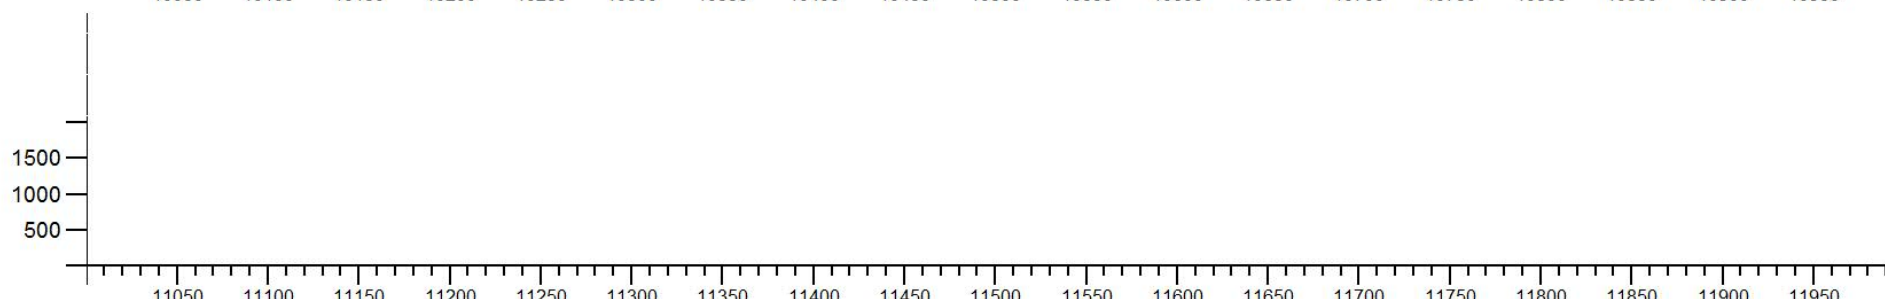

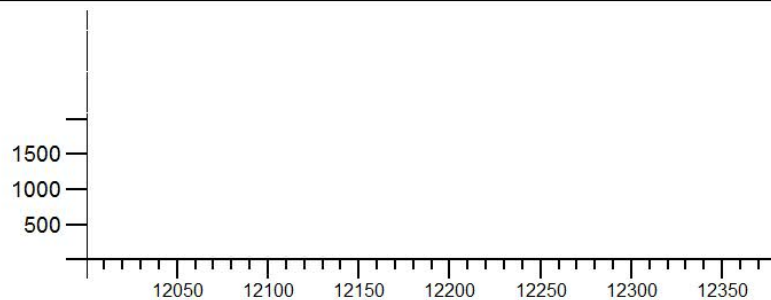

Supplement: raw_material.zip [file raw_material.zip]

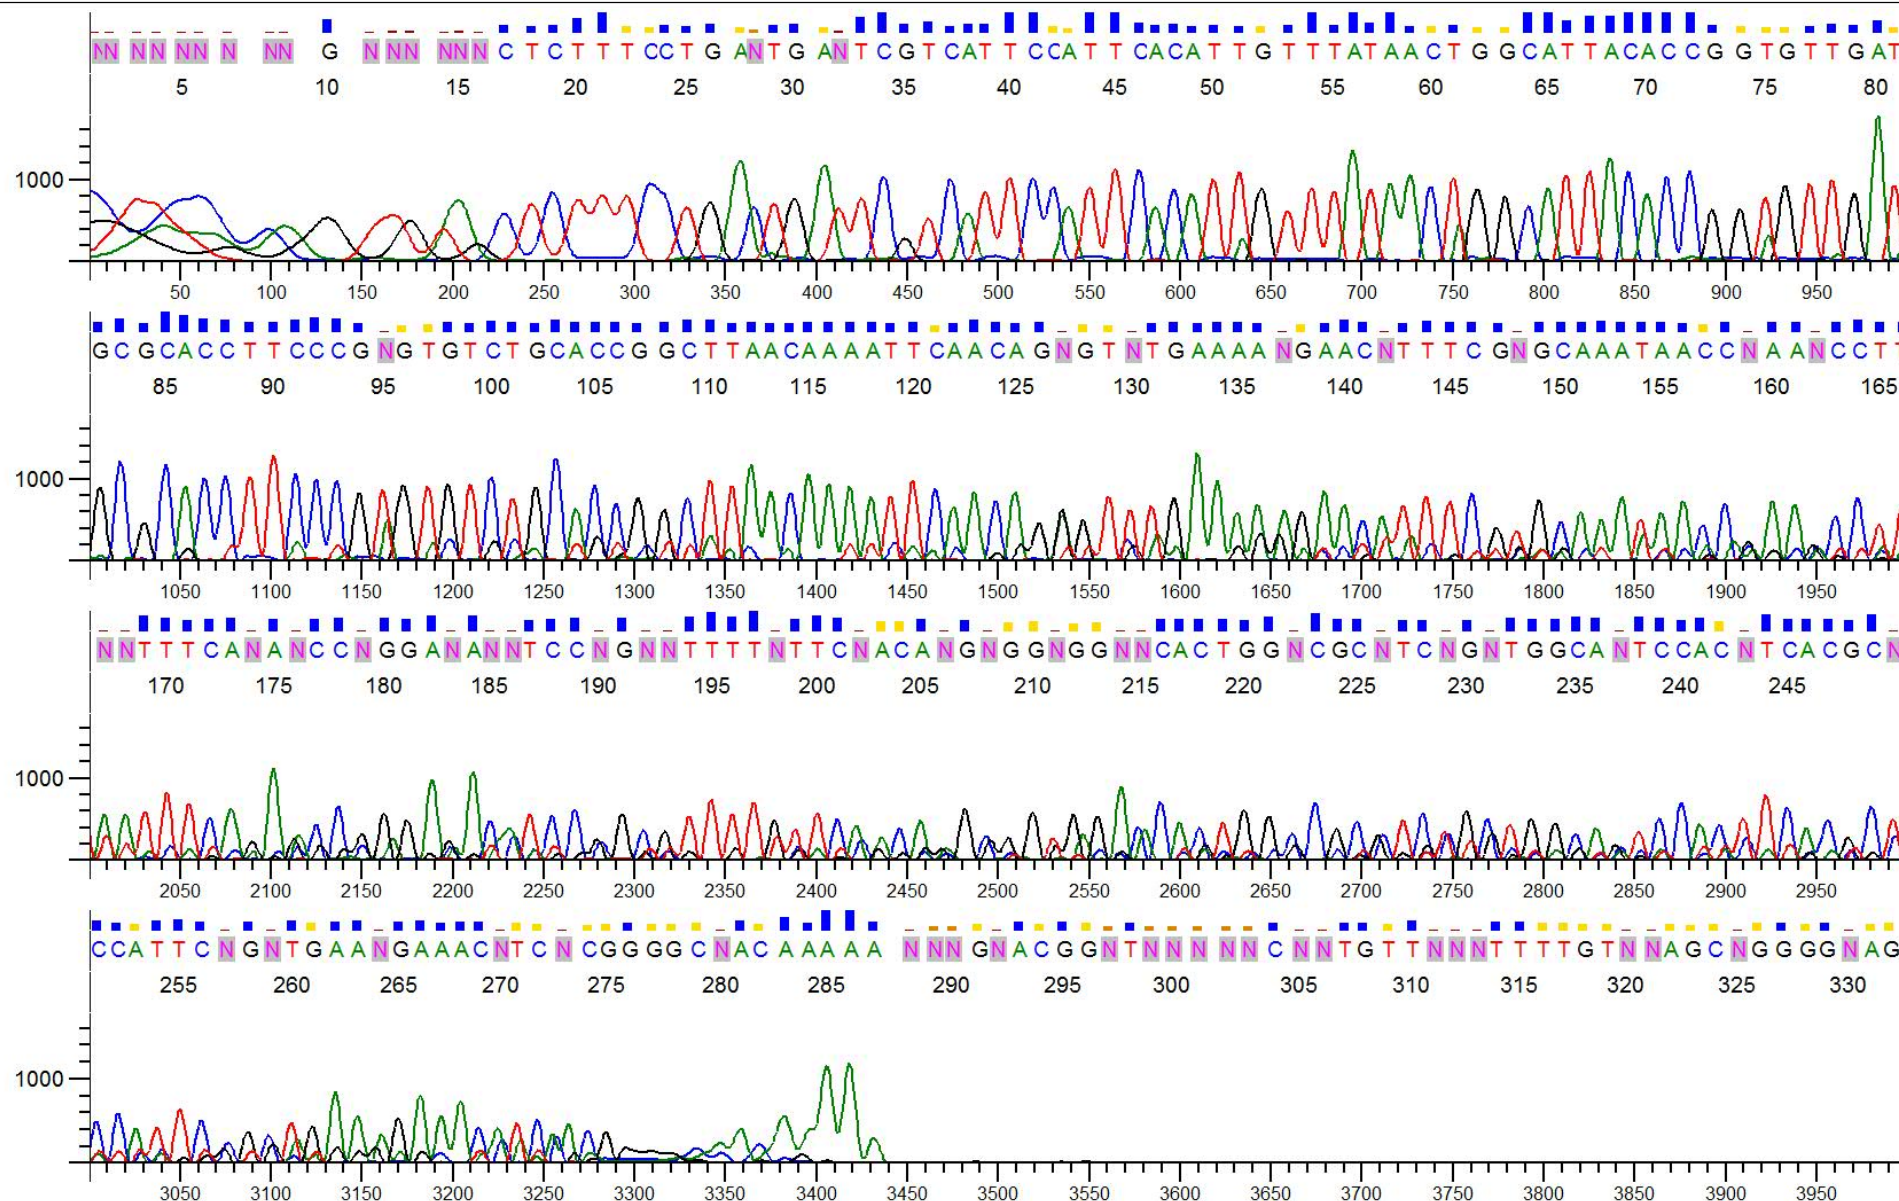

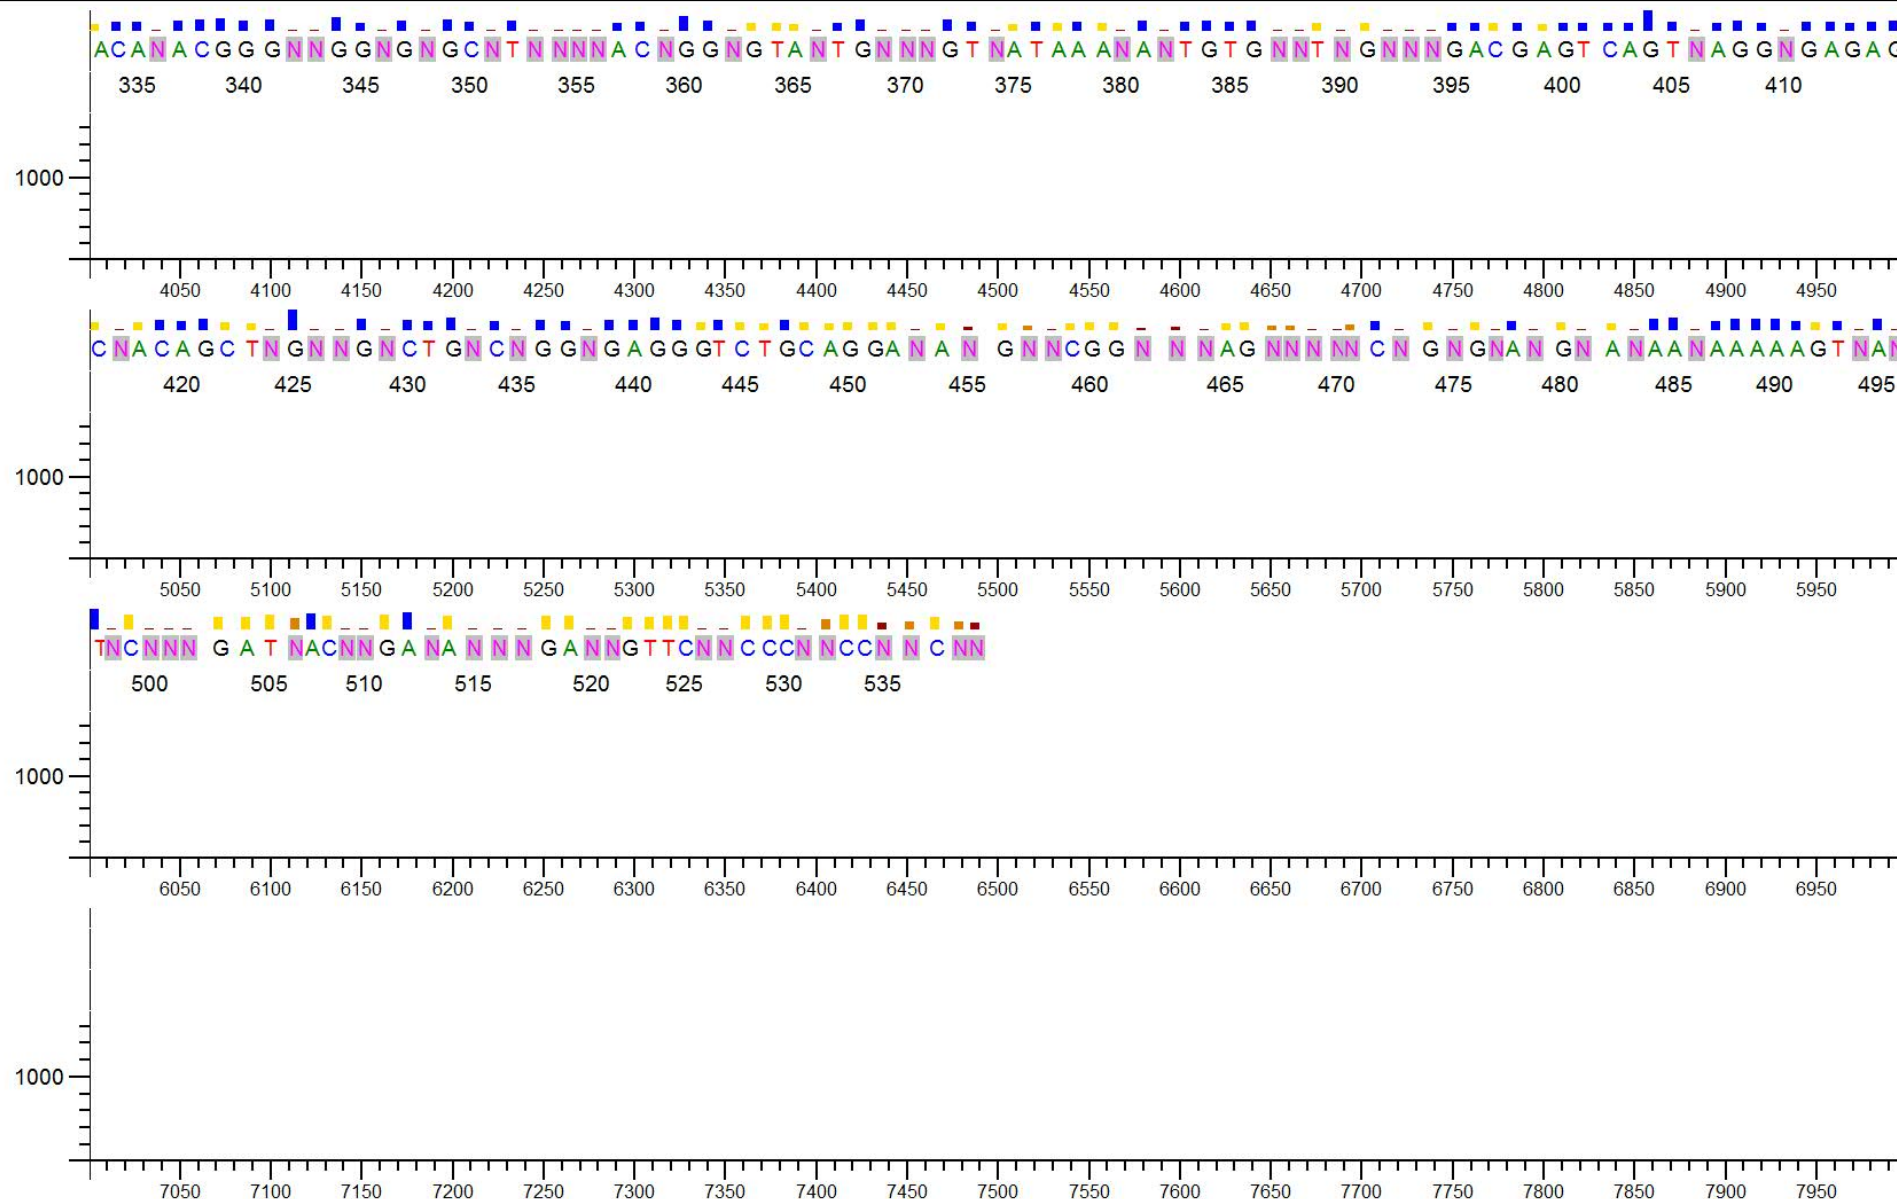

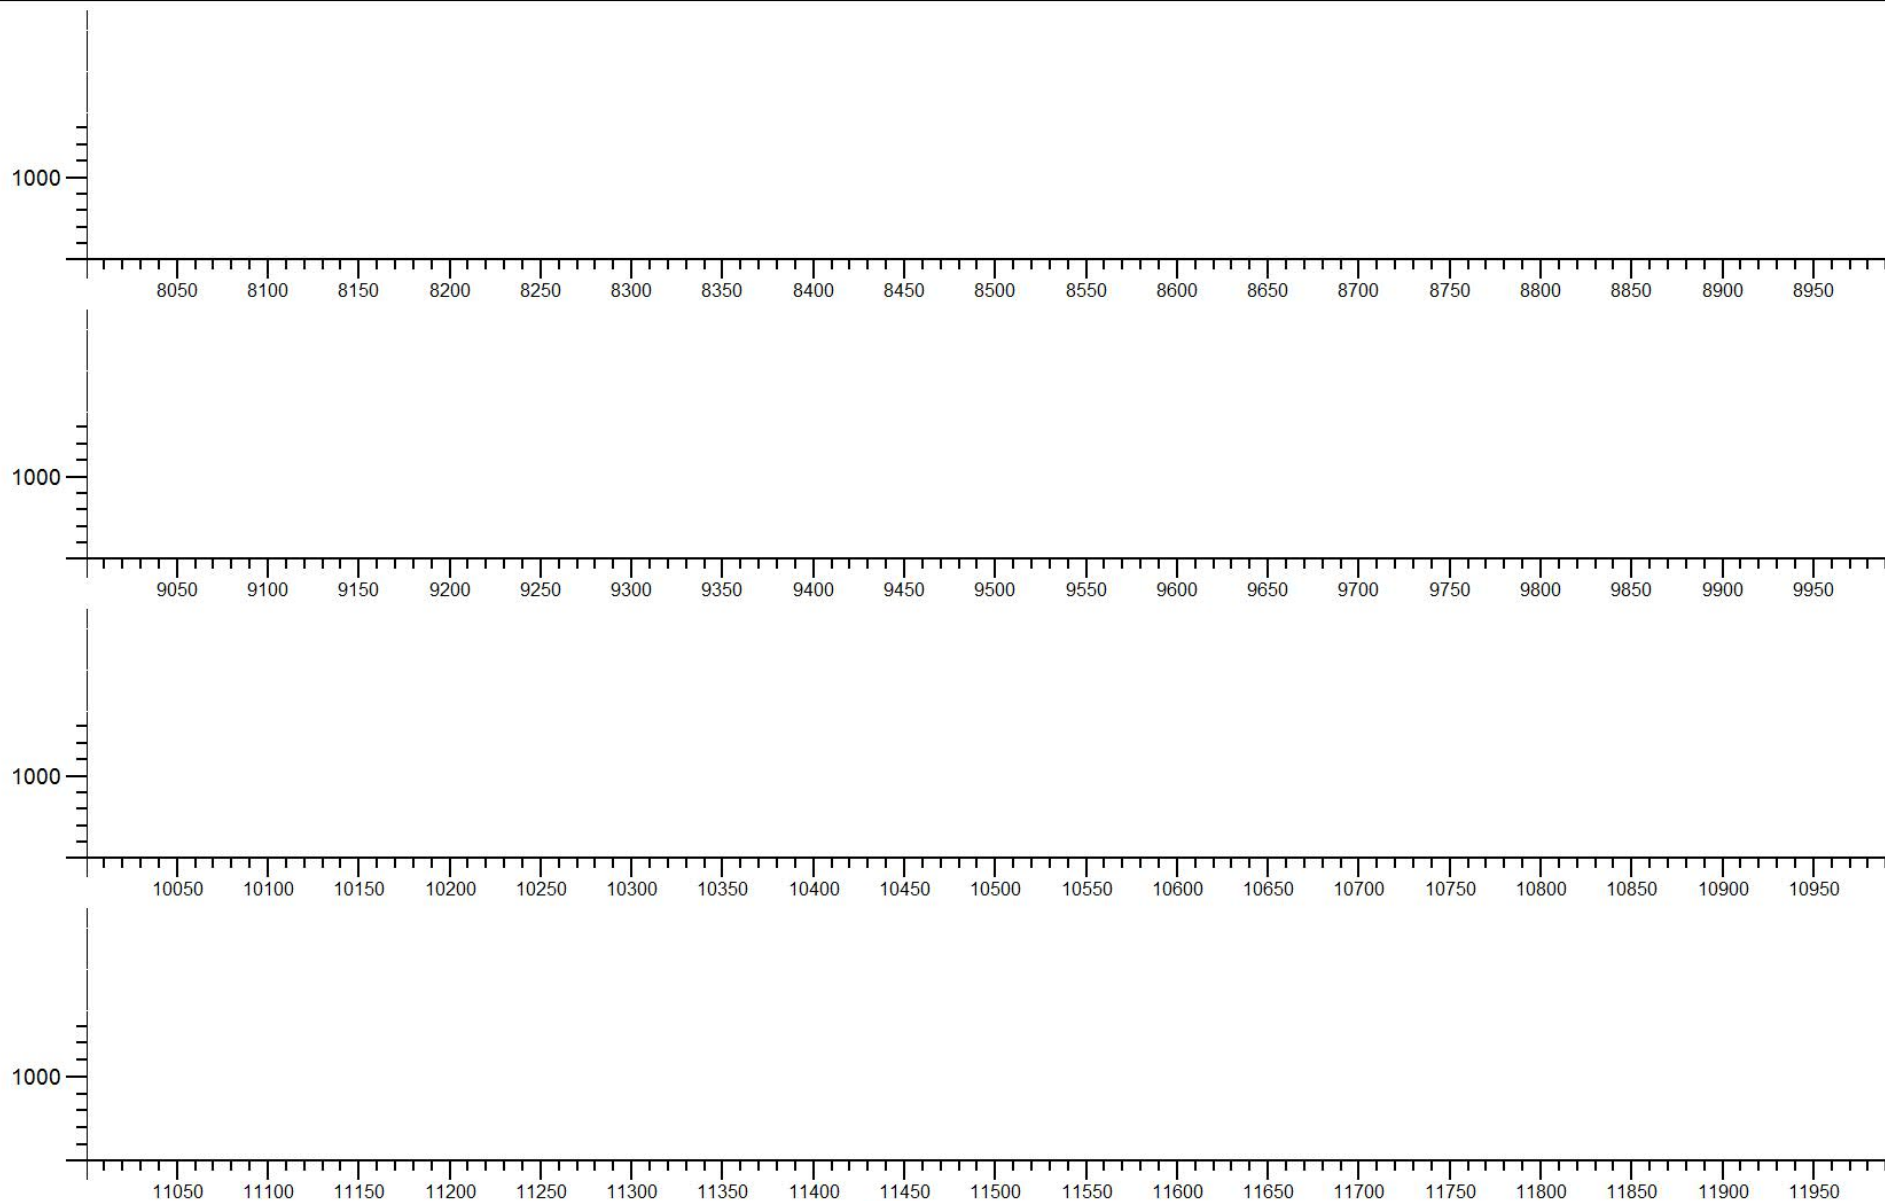



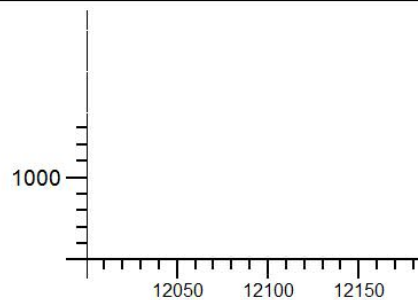

Supplement: raw_material.zip [file raw_material.zip]

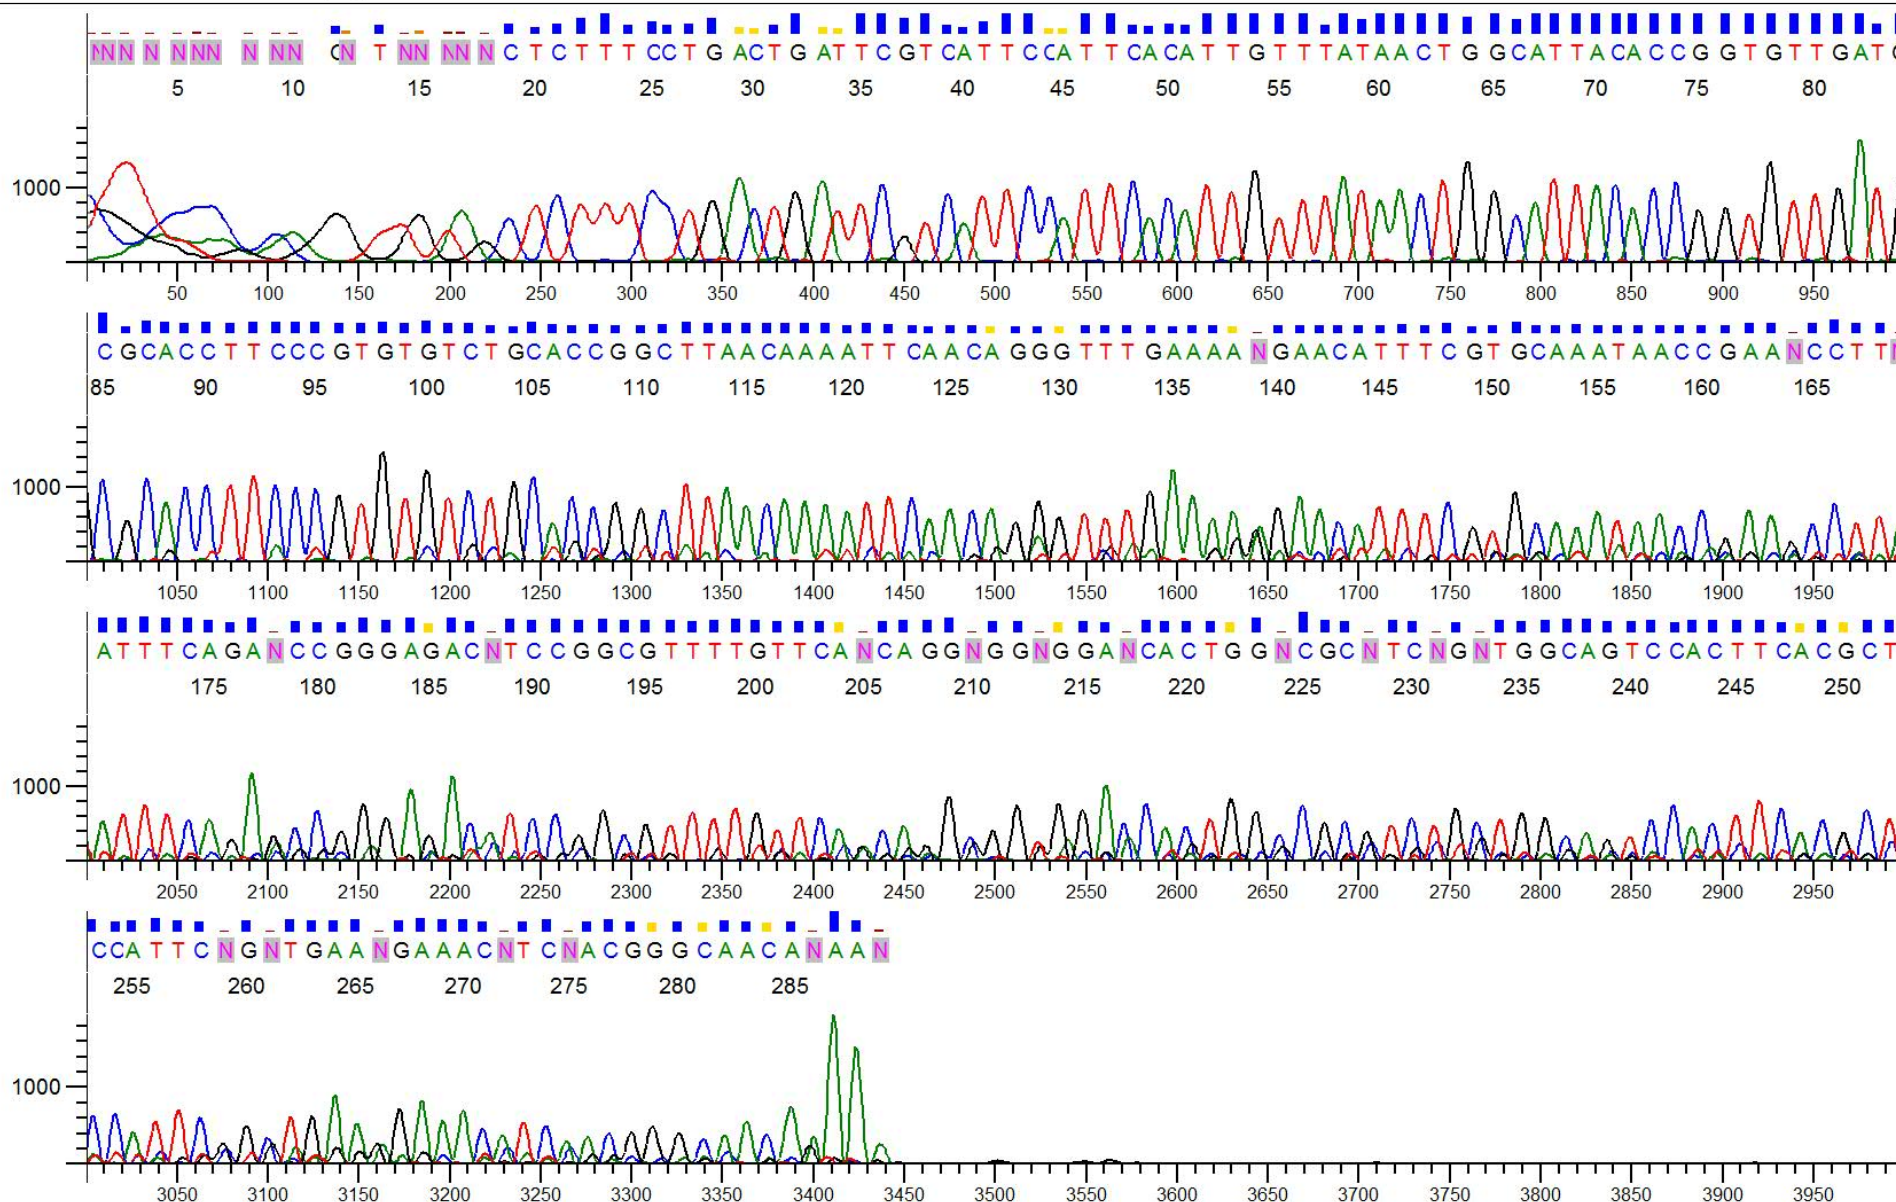

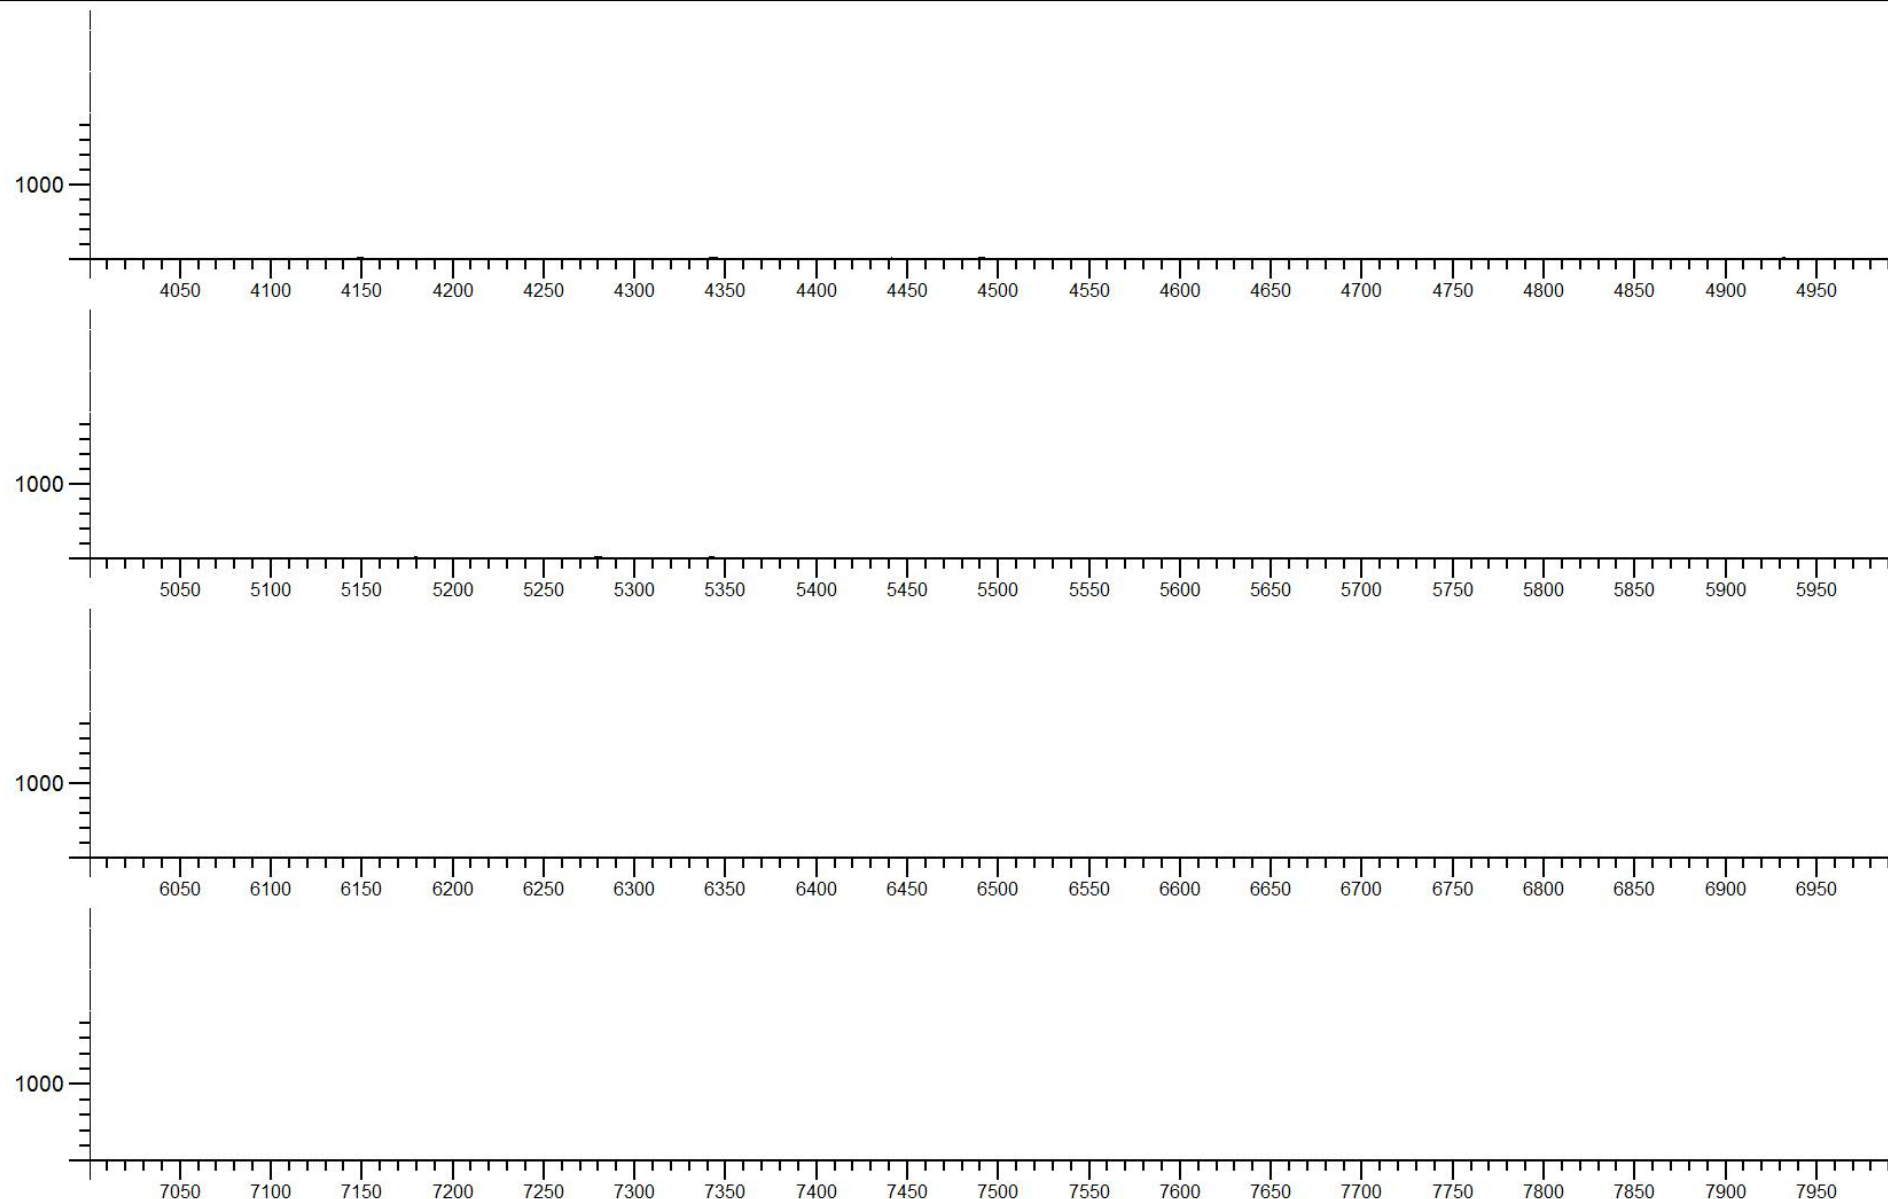

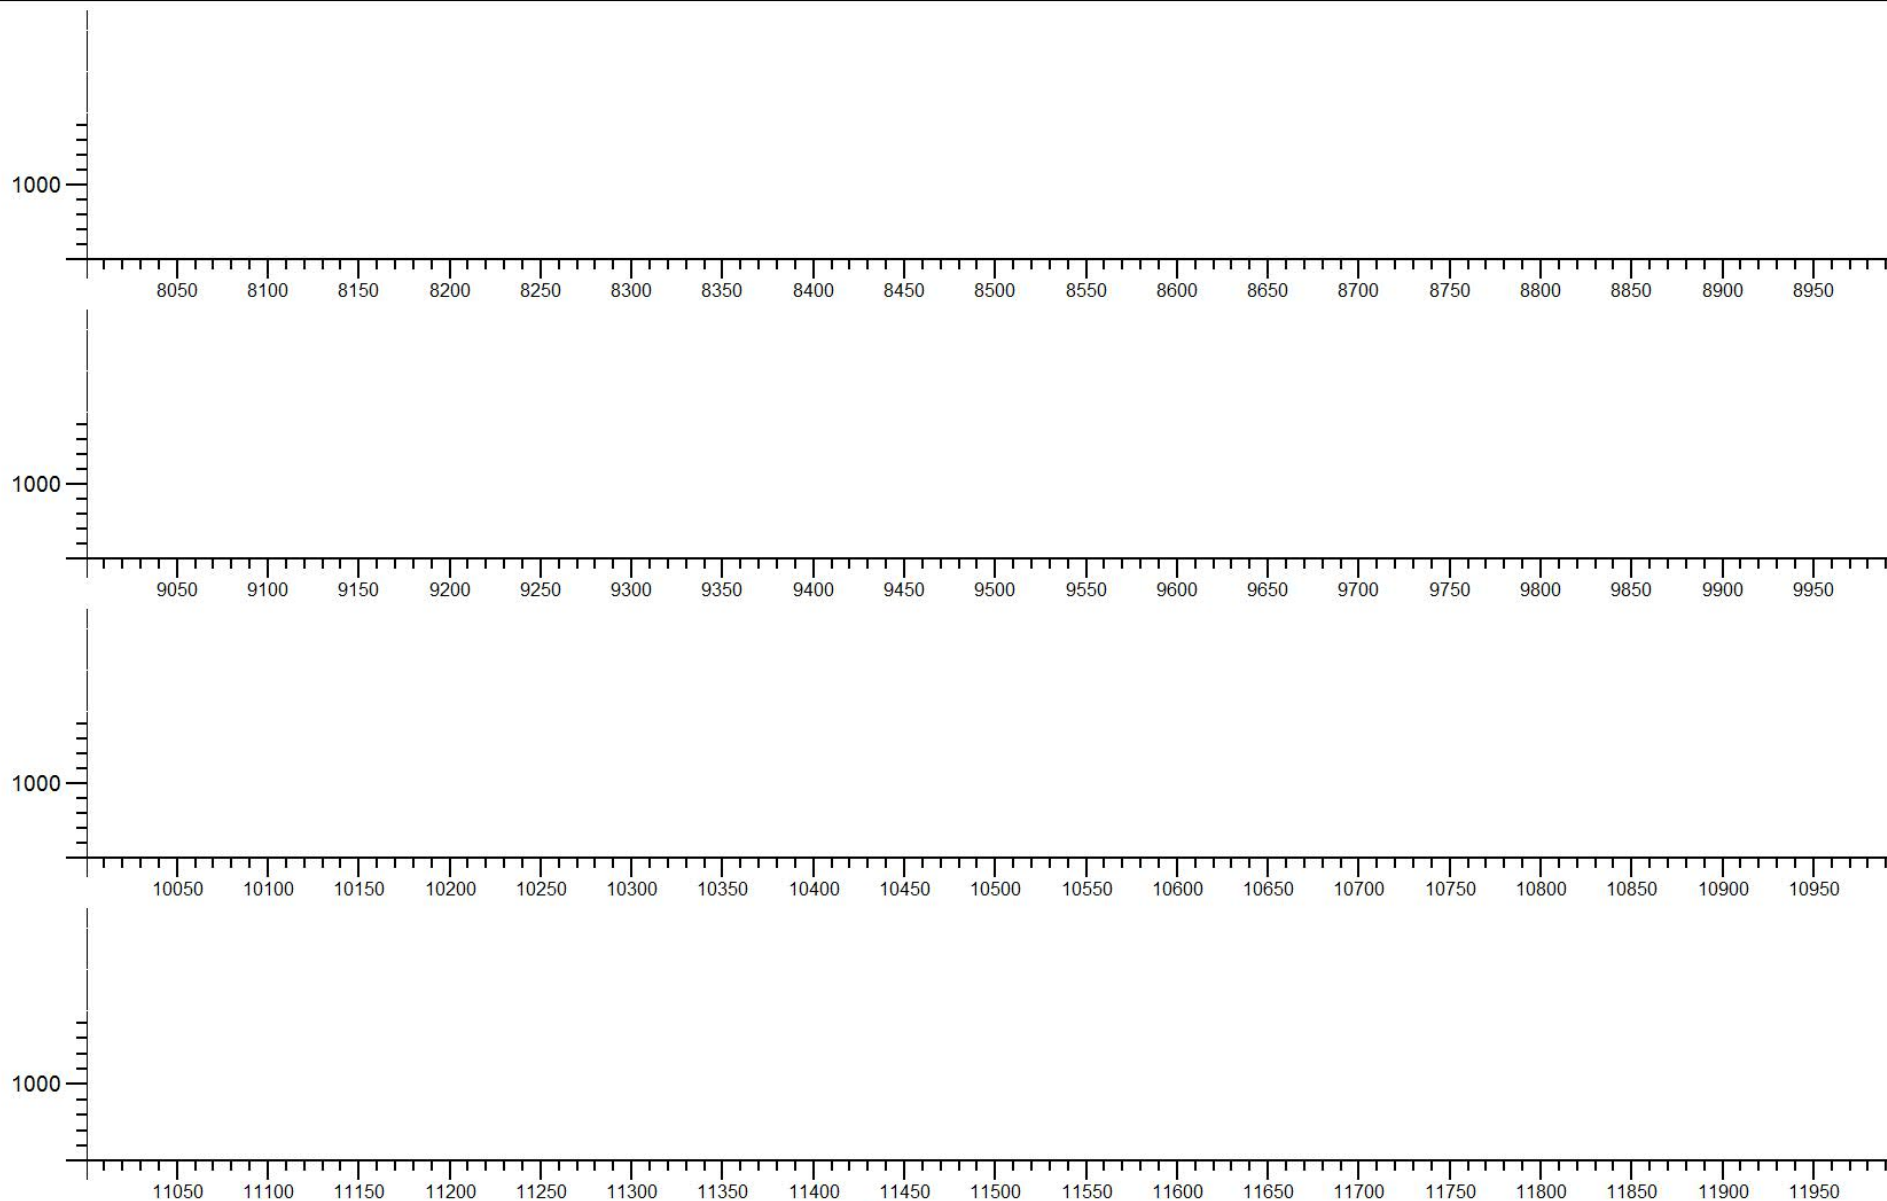

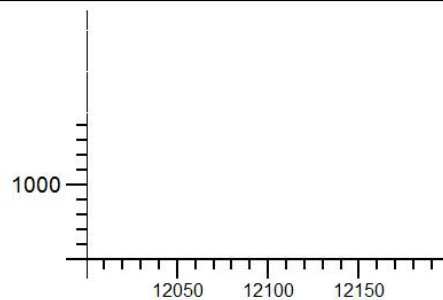

Supplement: raw_material.zip [file raw_material.zip]

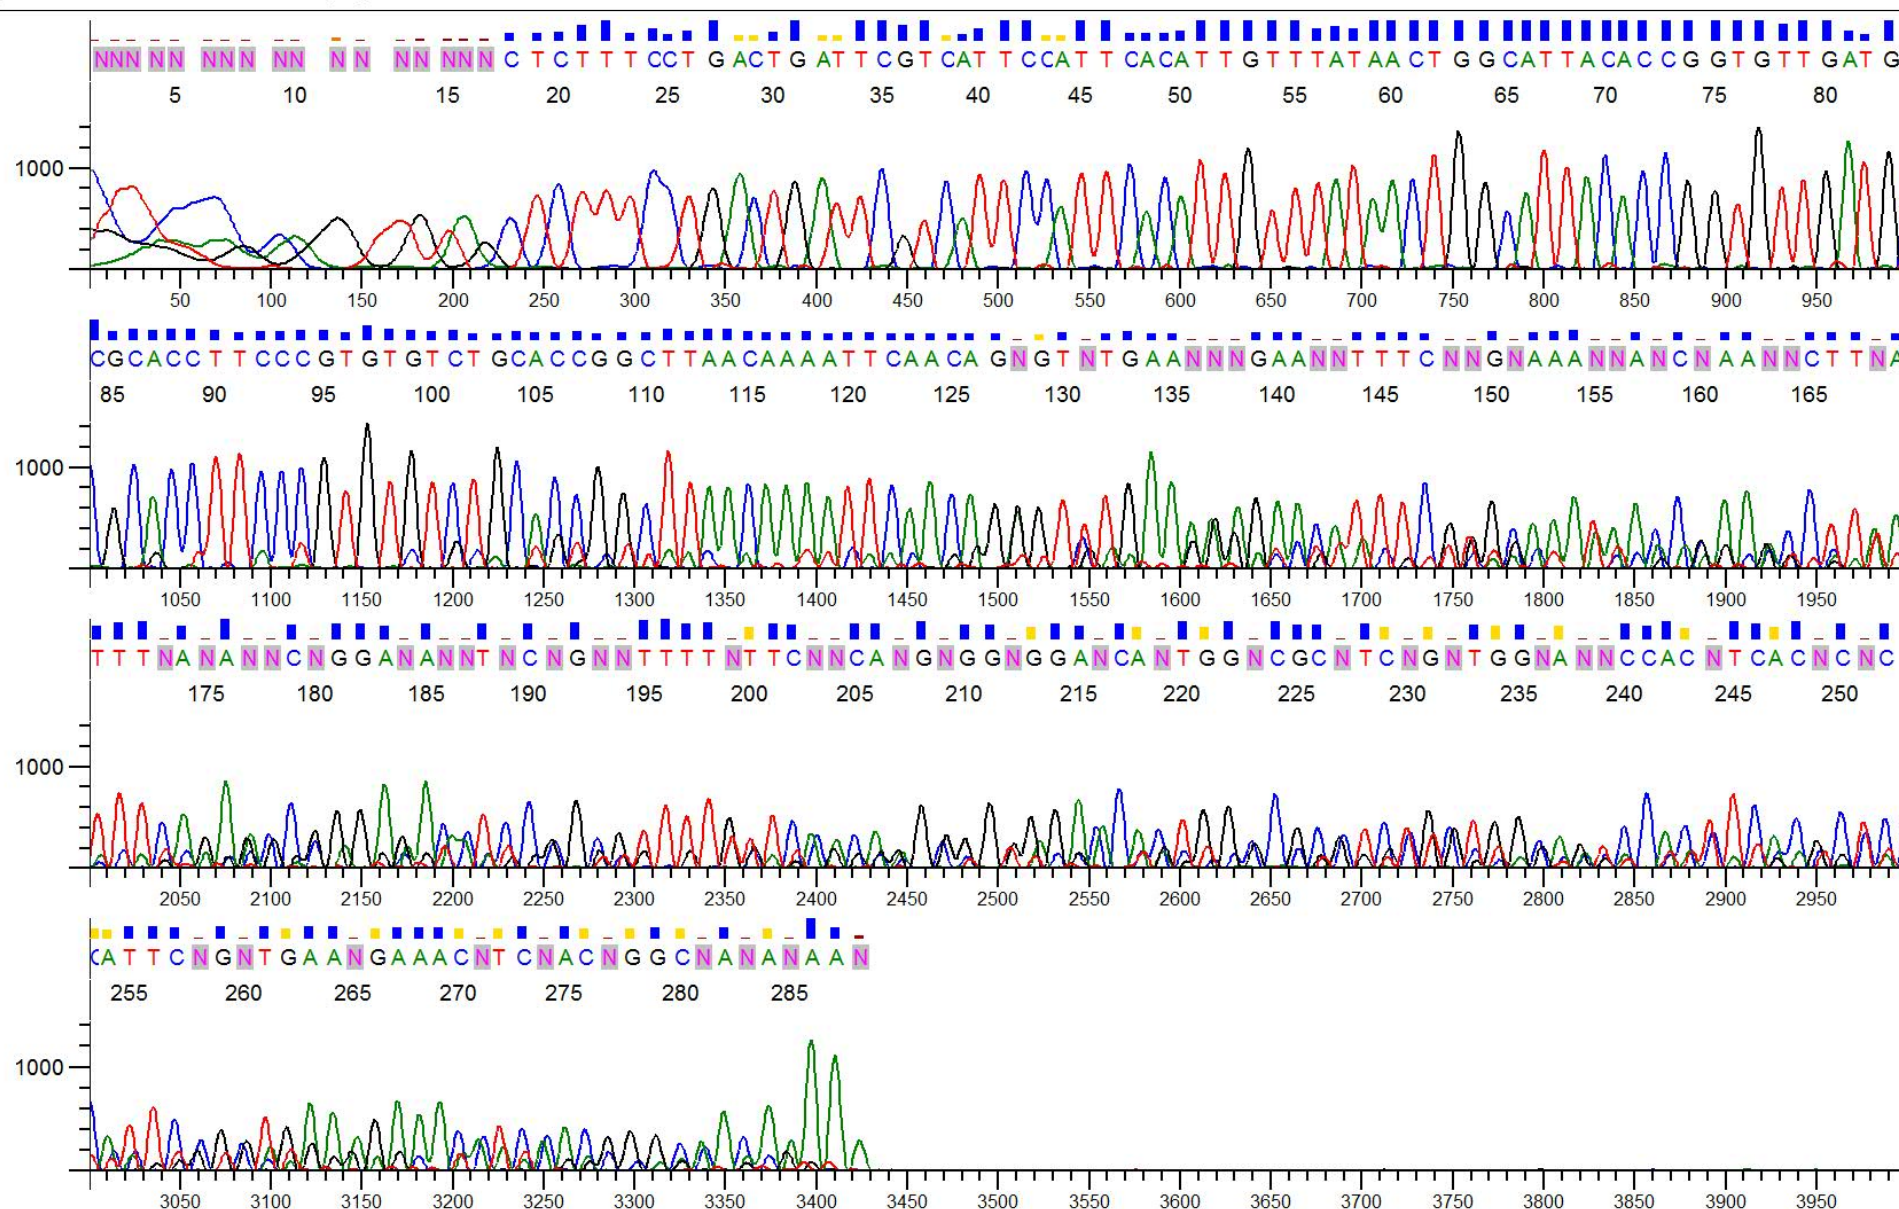

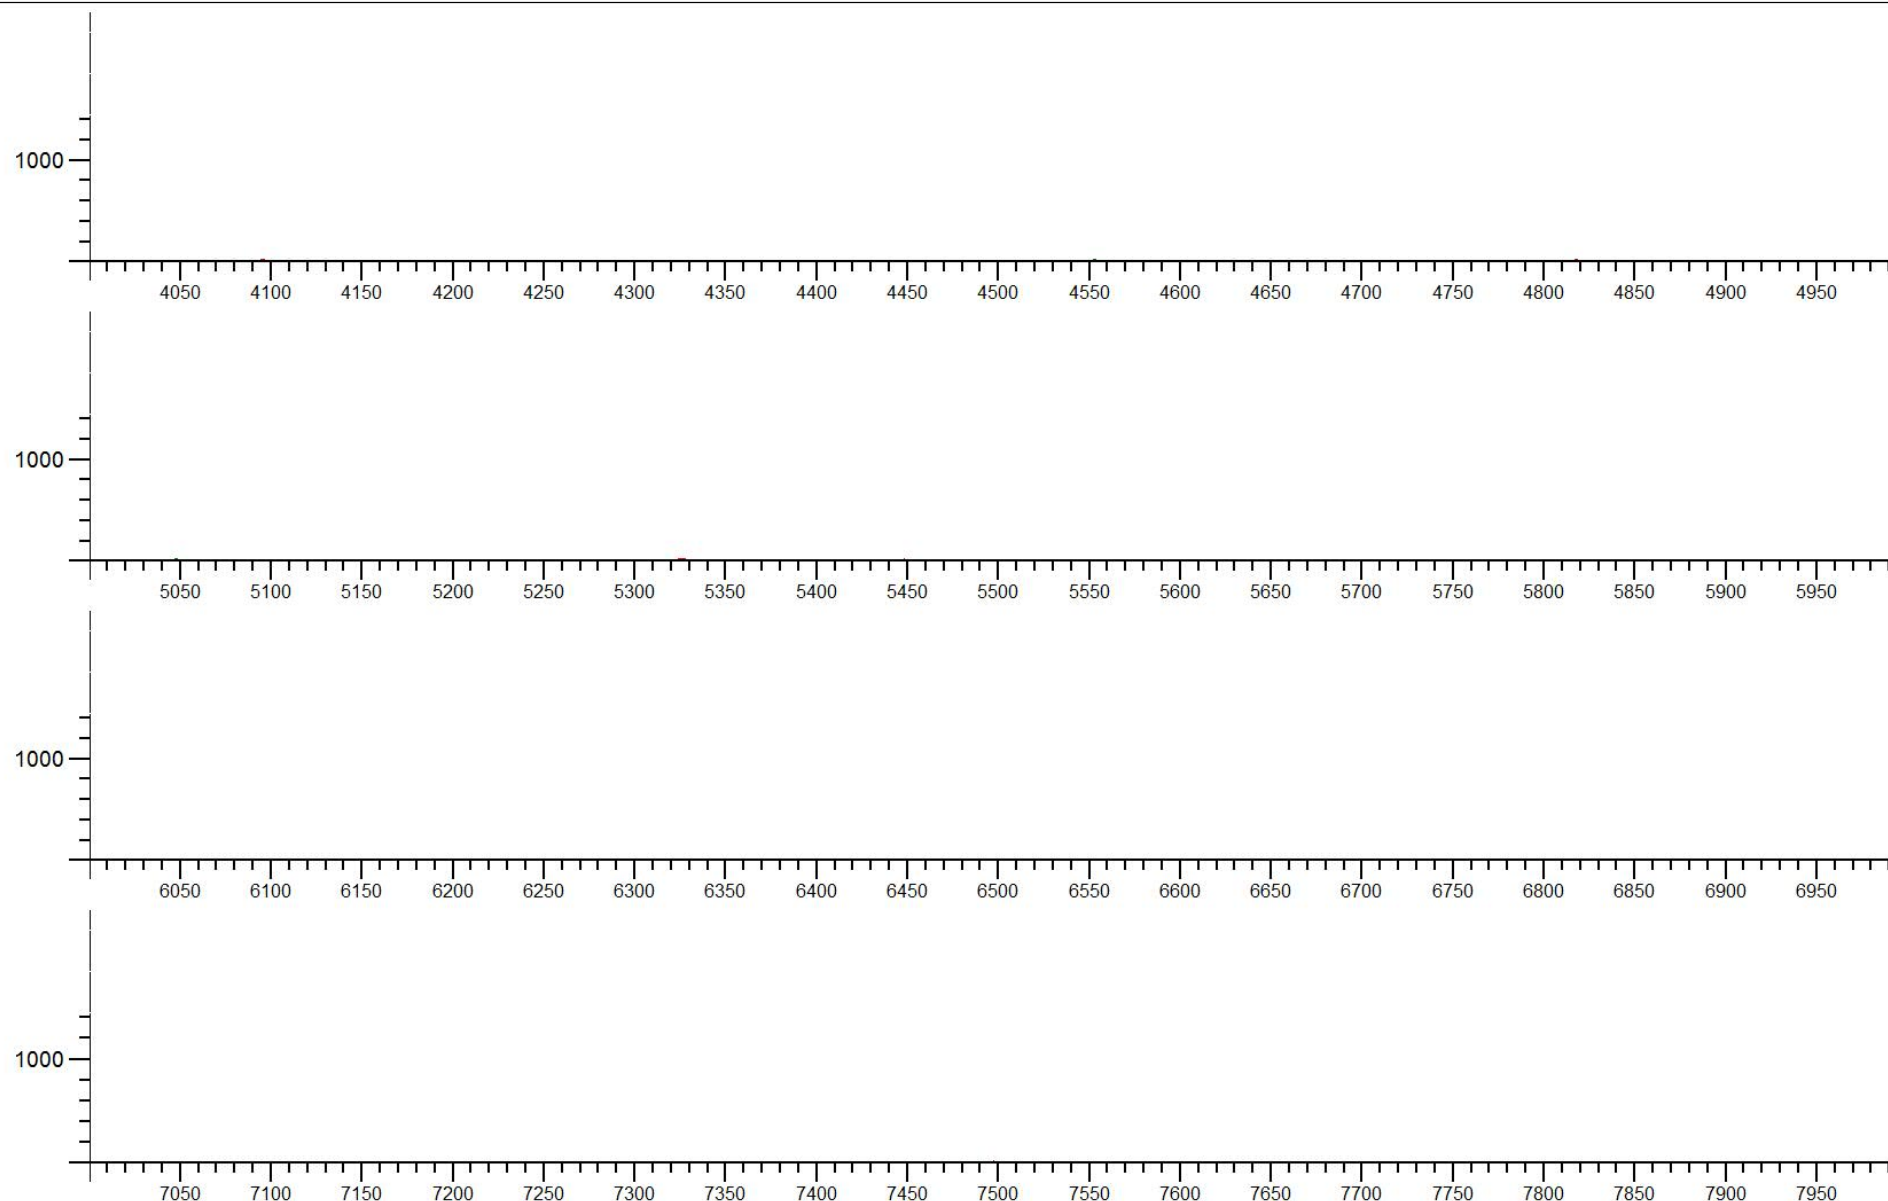

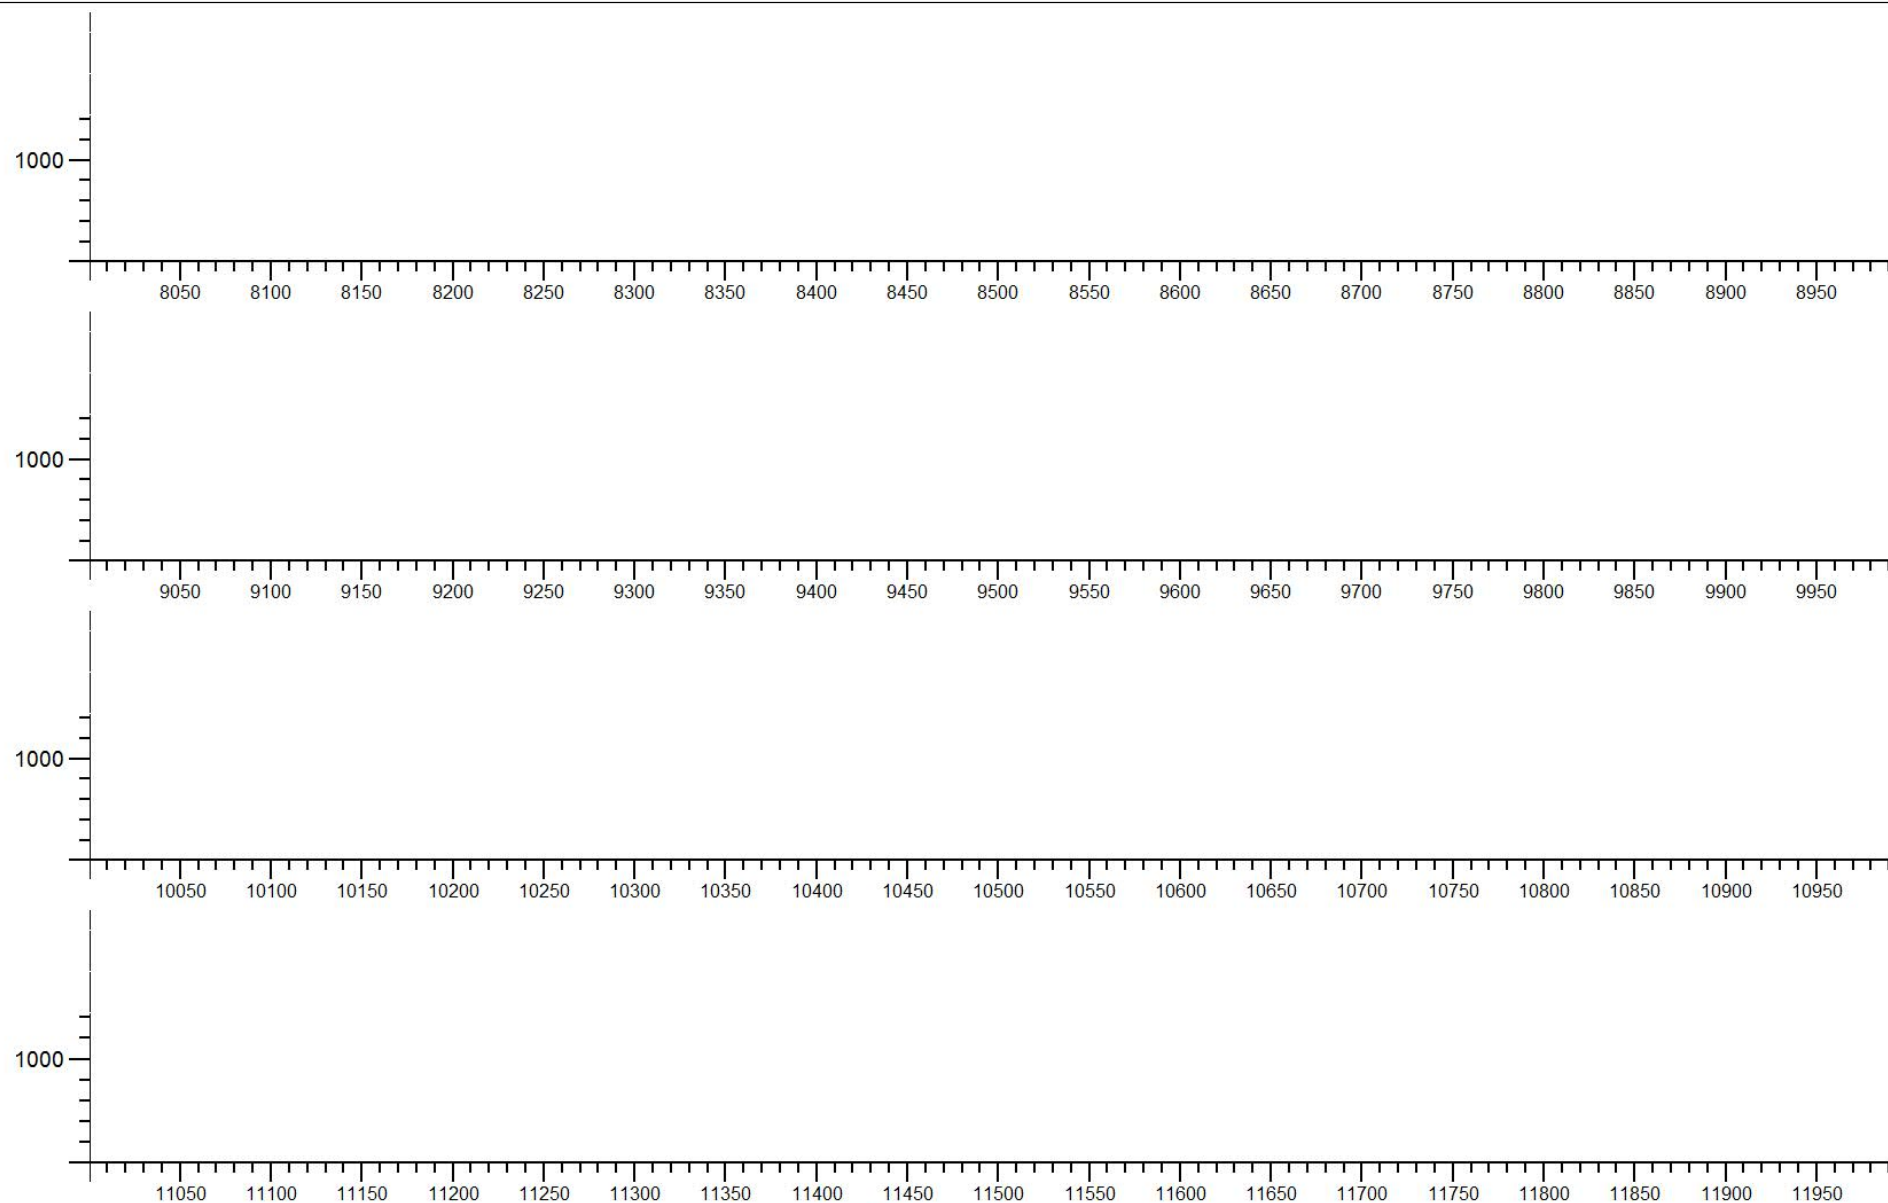

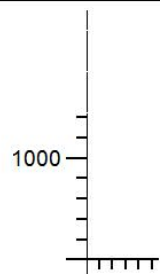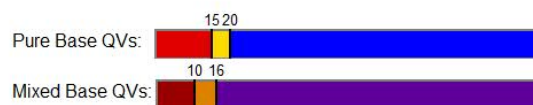

Supplement: raw_material.zip [file raw_material.zip]

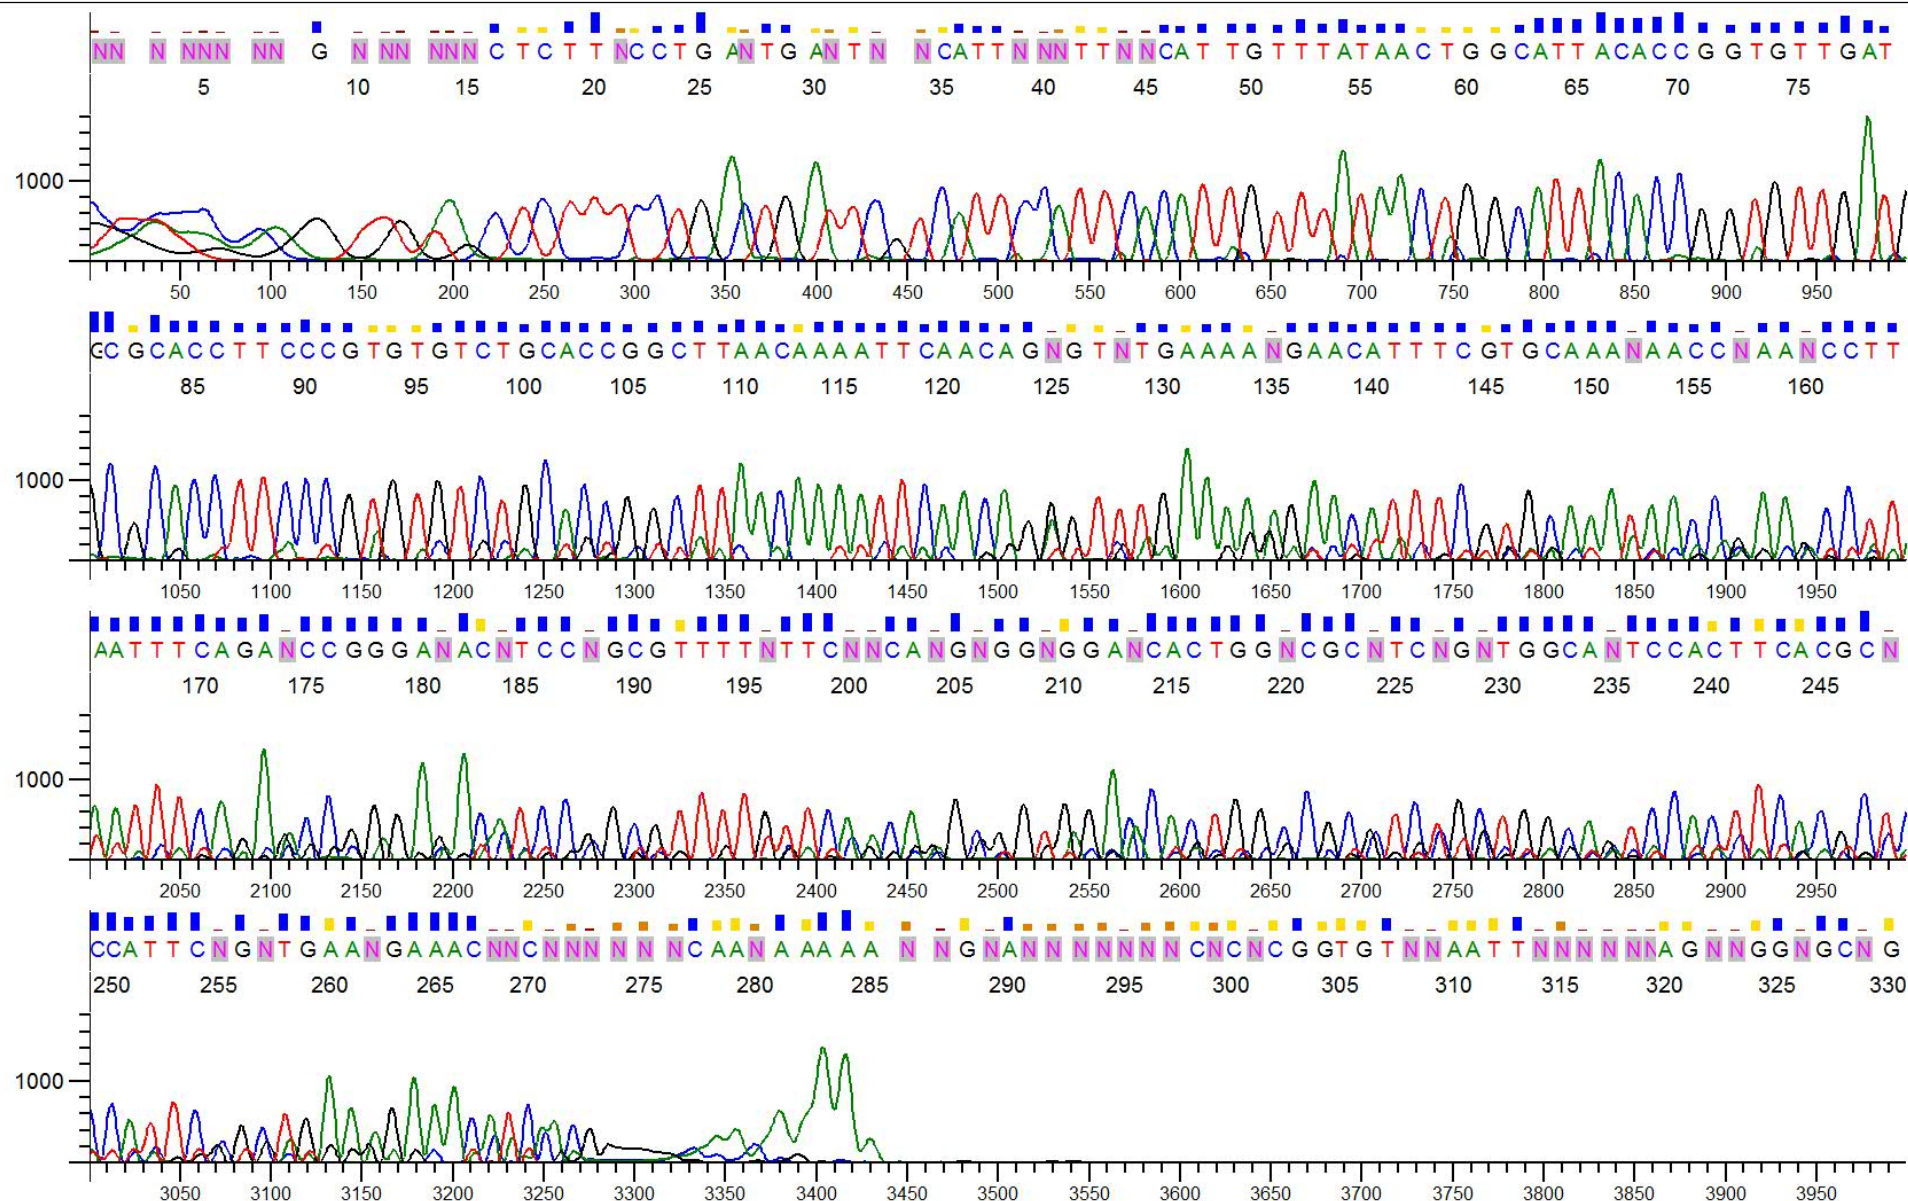

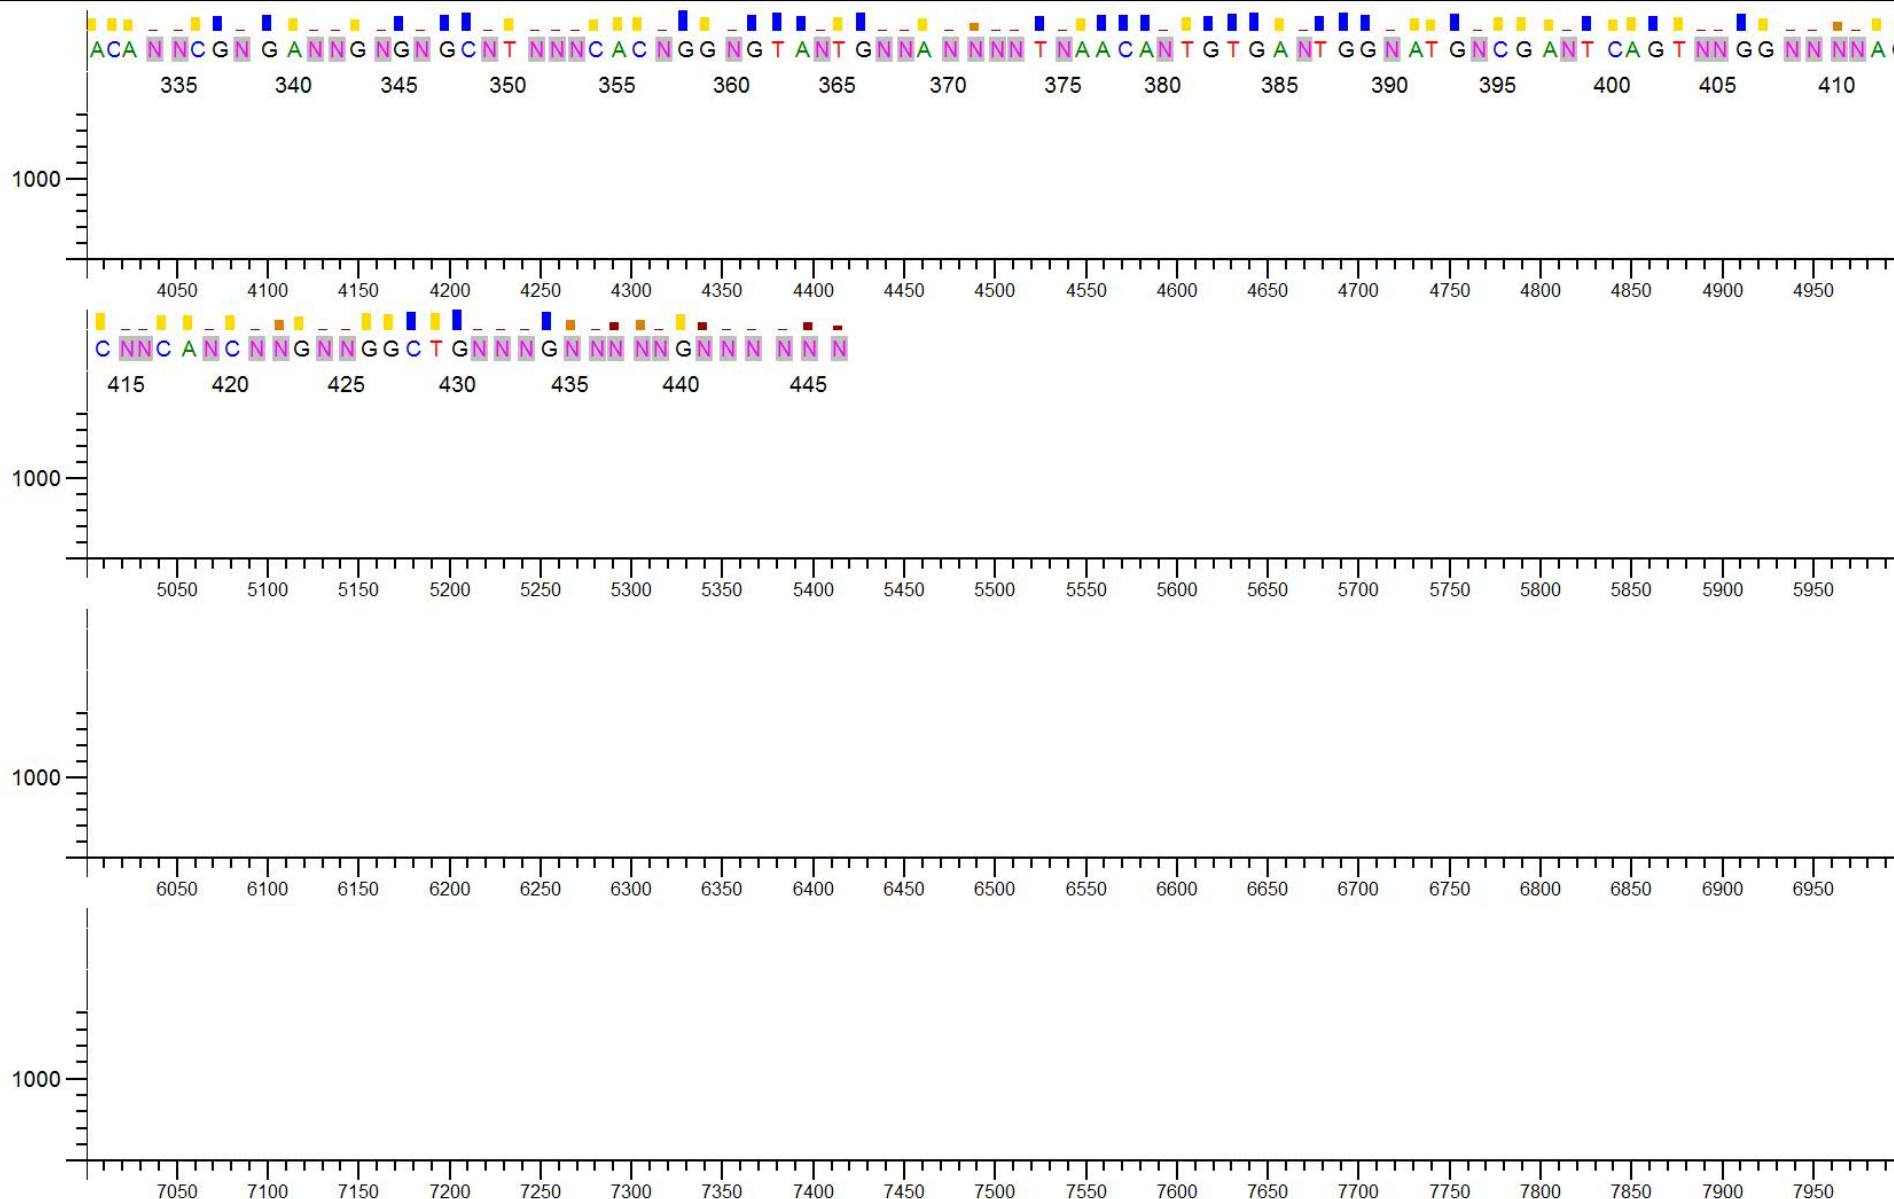

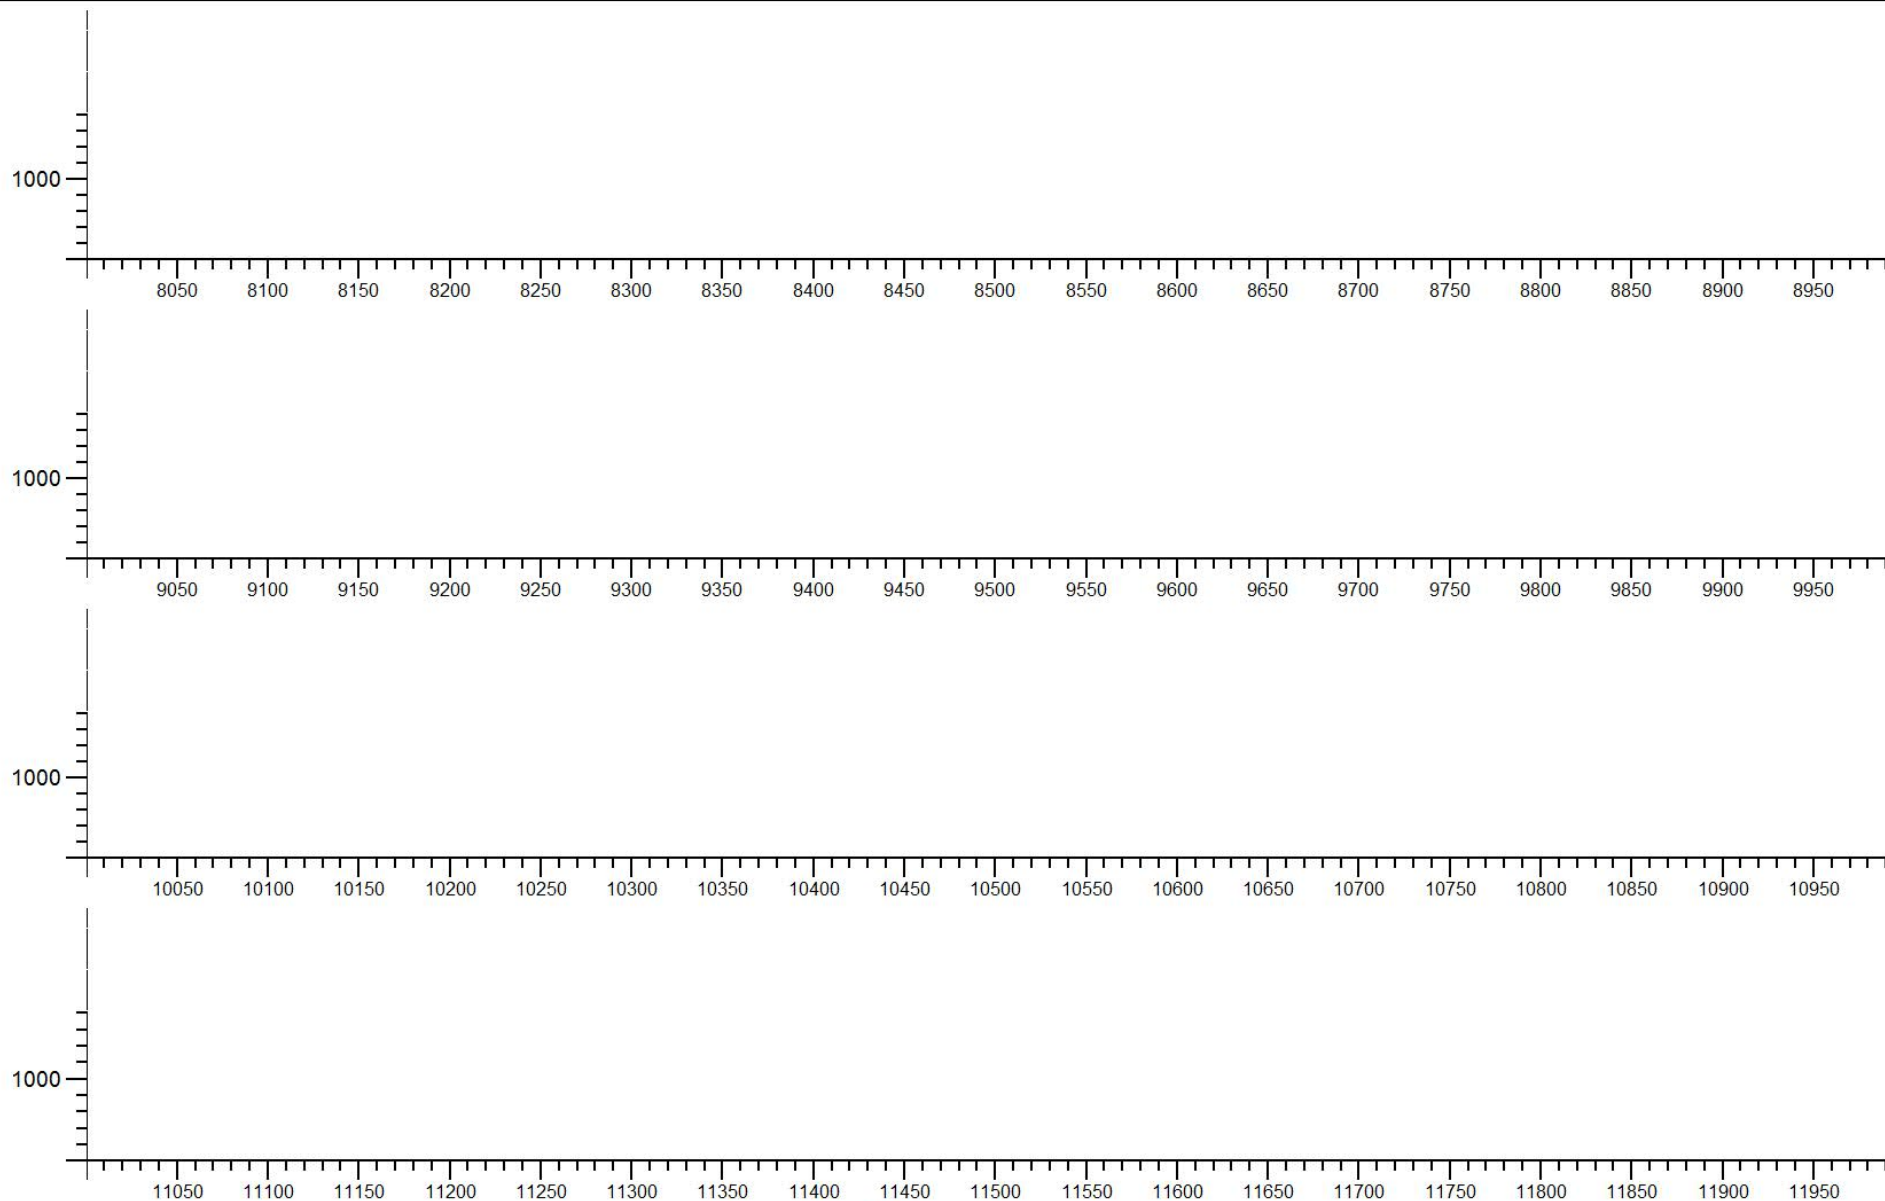



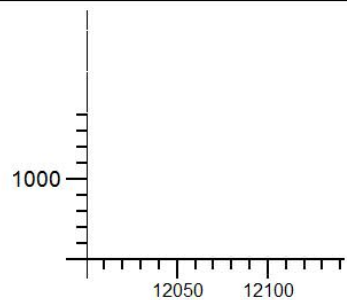

Supplement: raw_material.zip [file raw_material.zip]

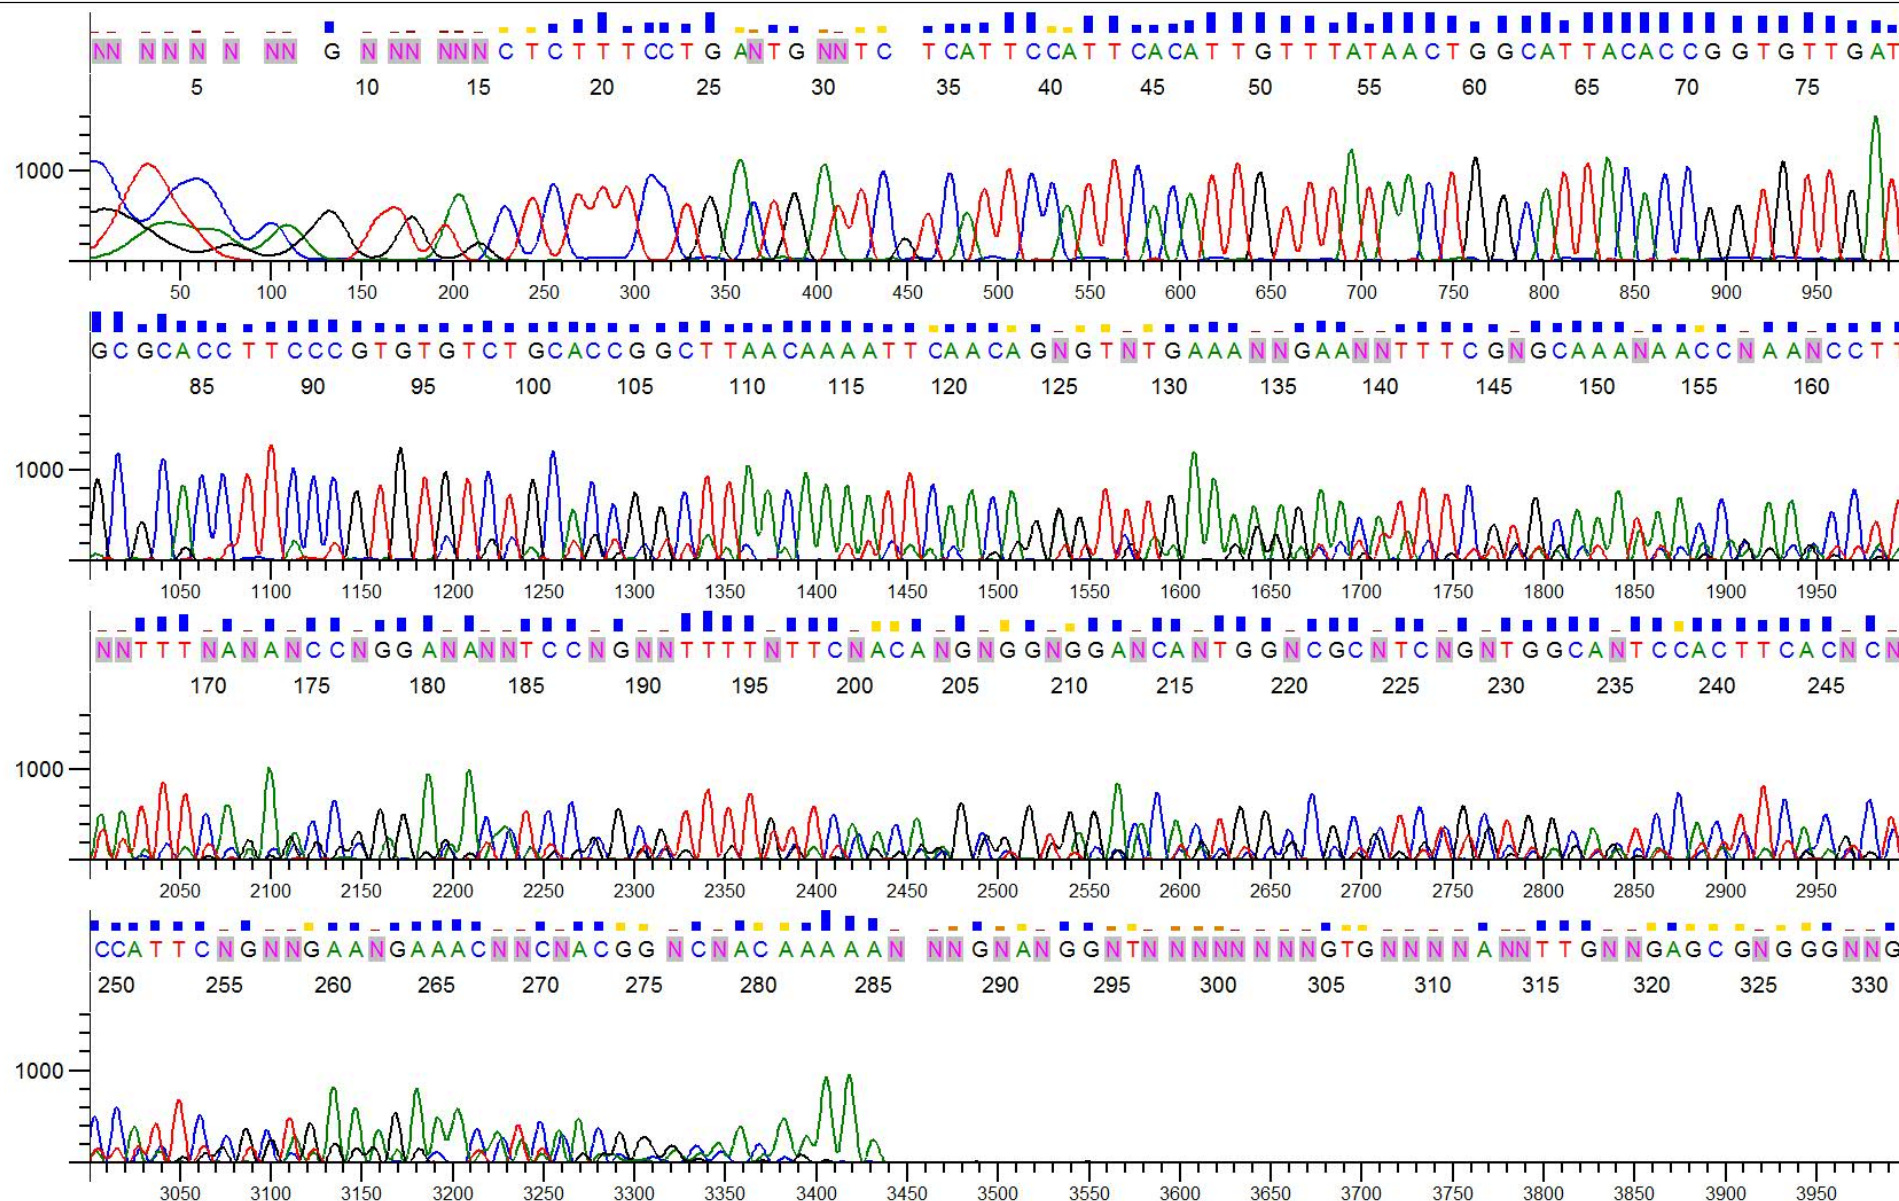

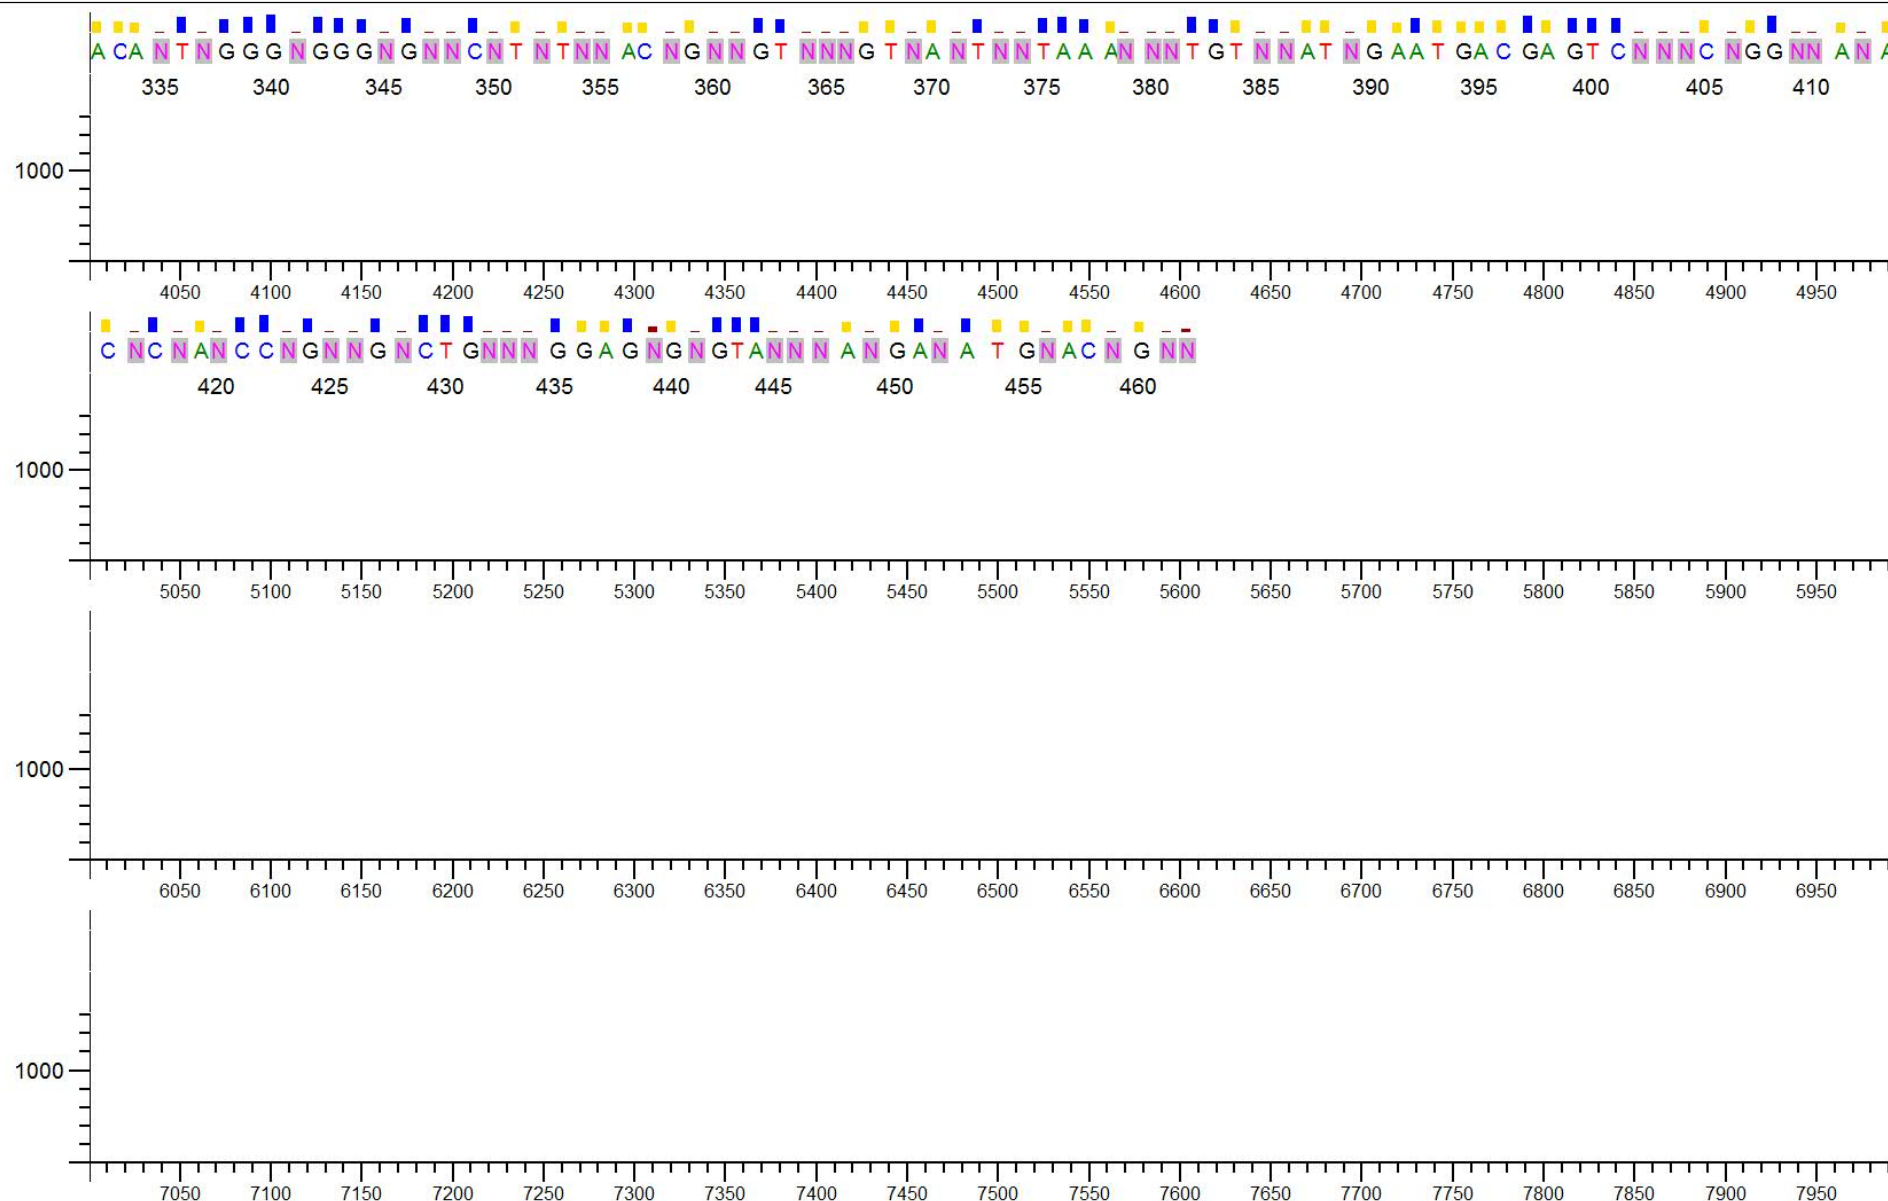

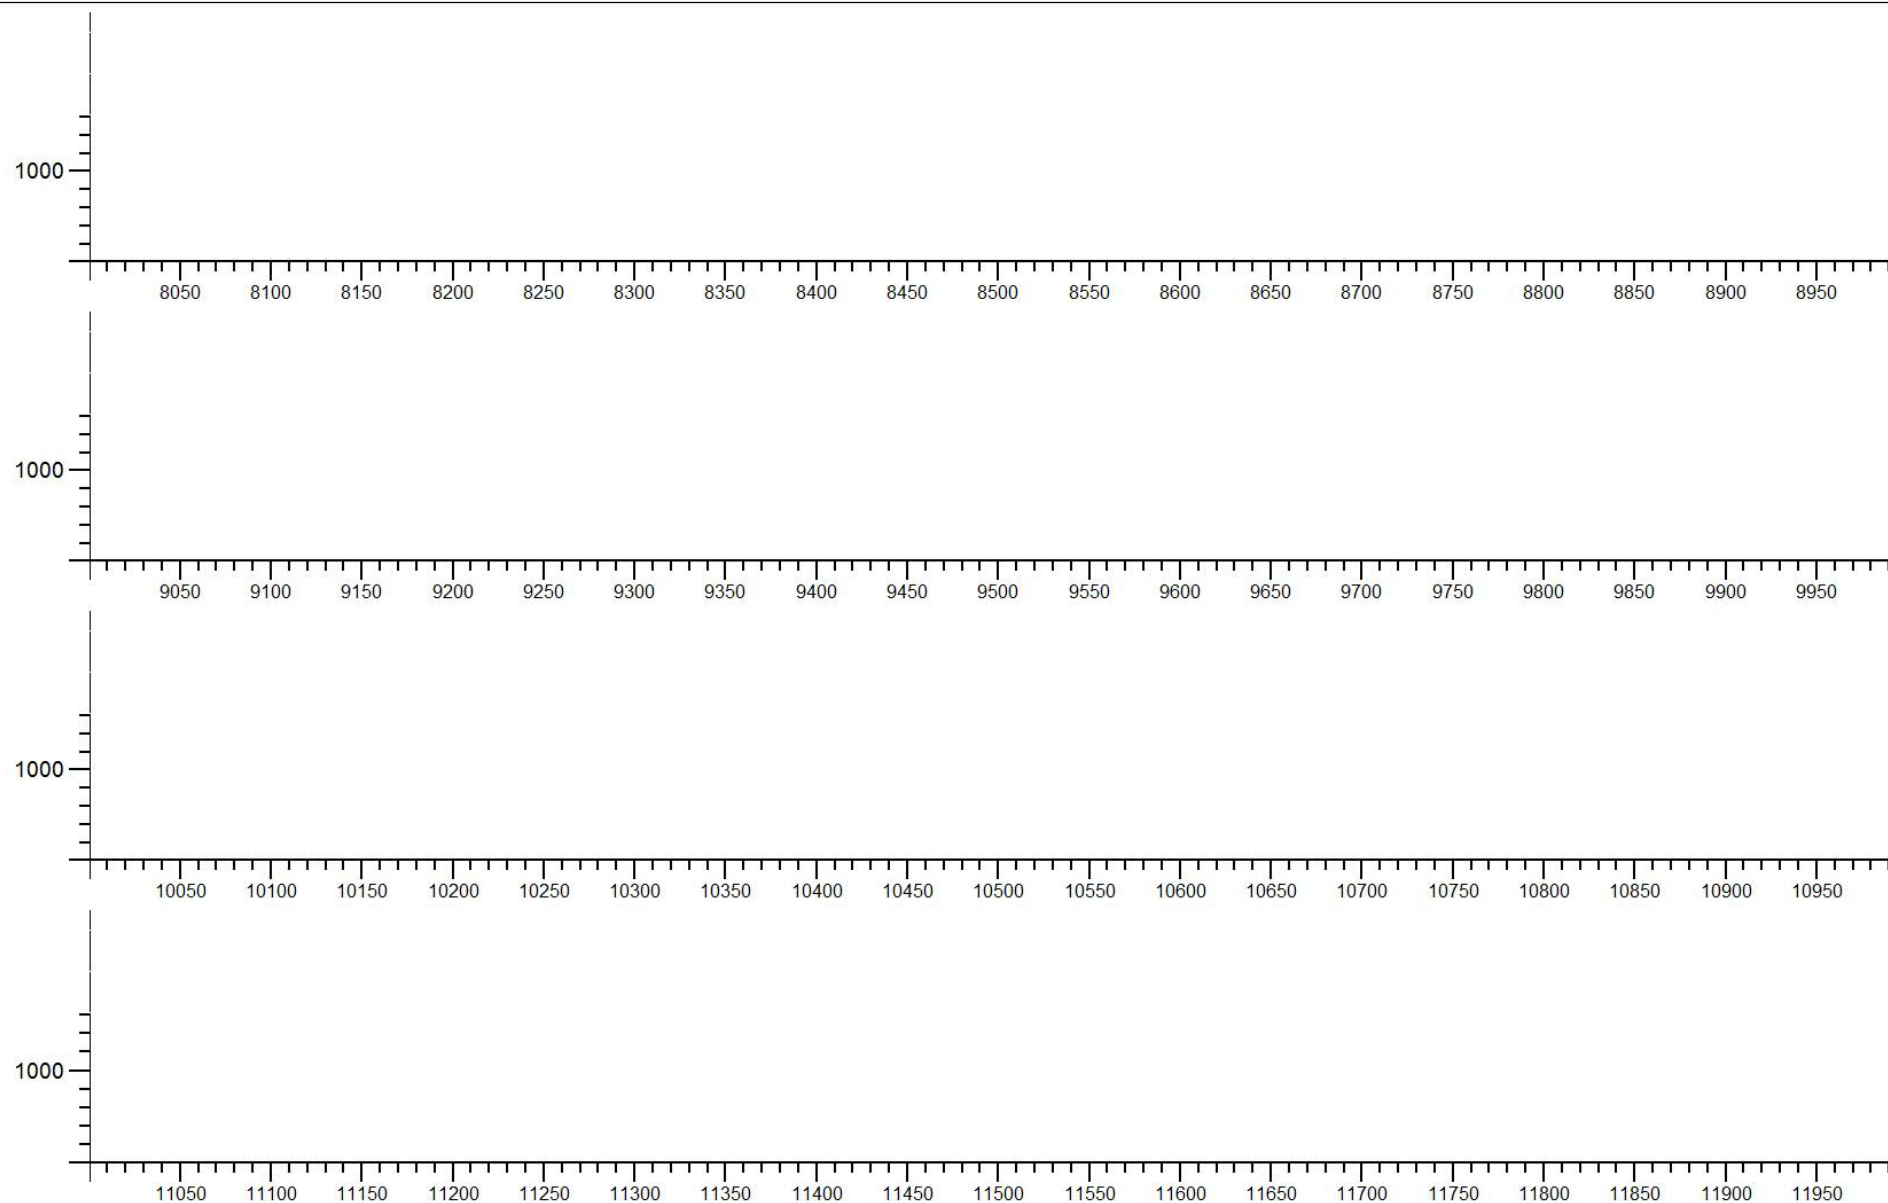

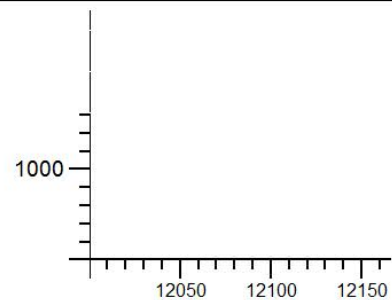

Supplement: raw_material.zip [file raw_material.zip]

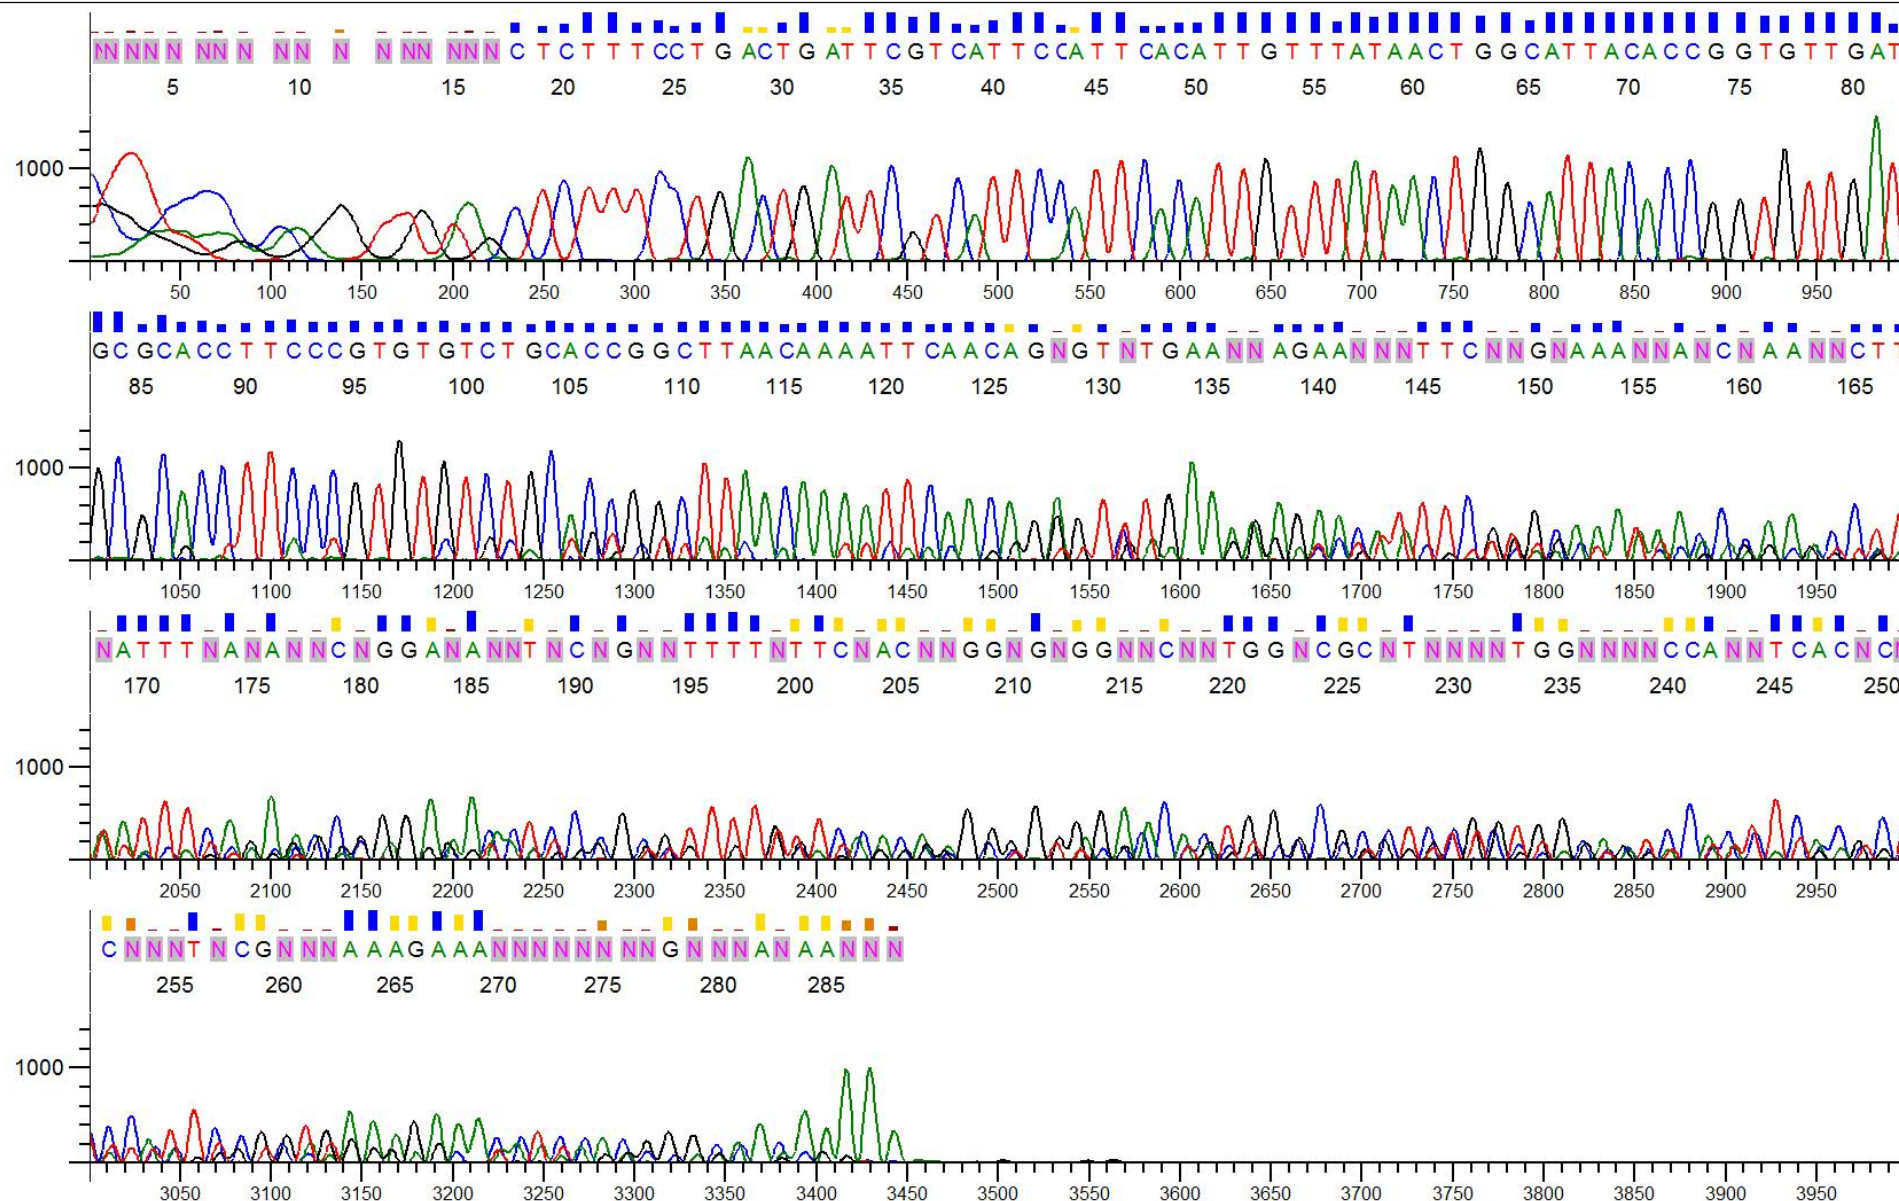

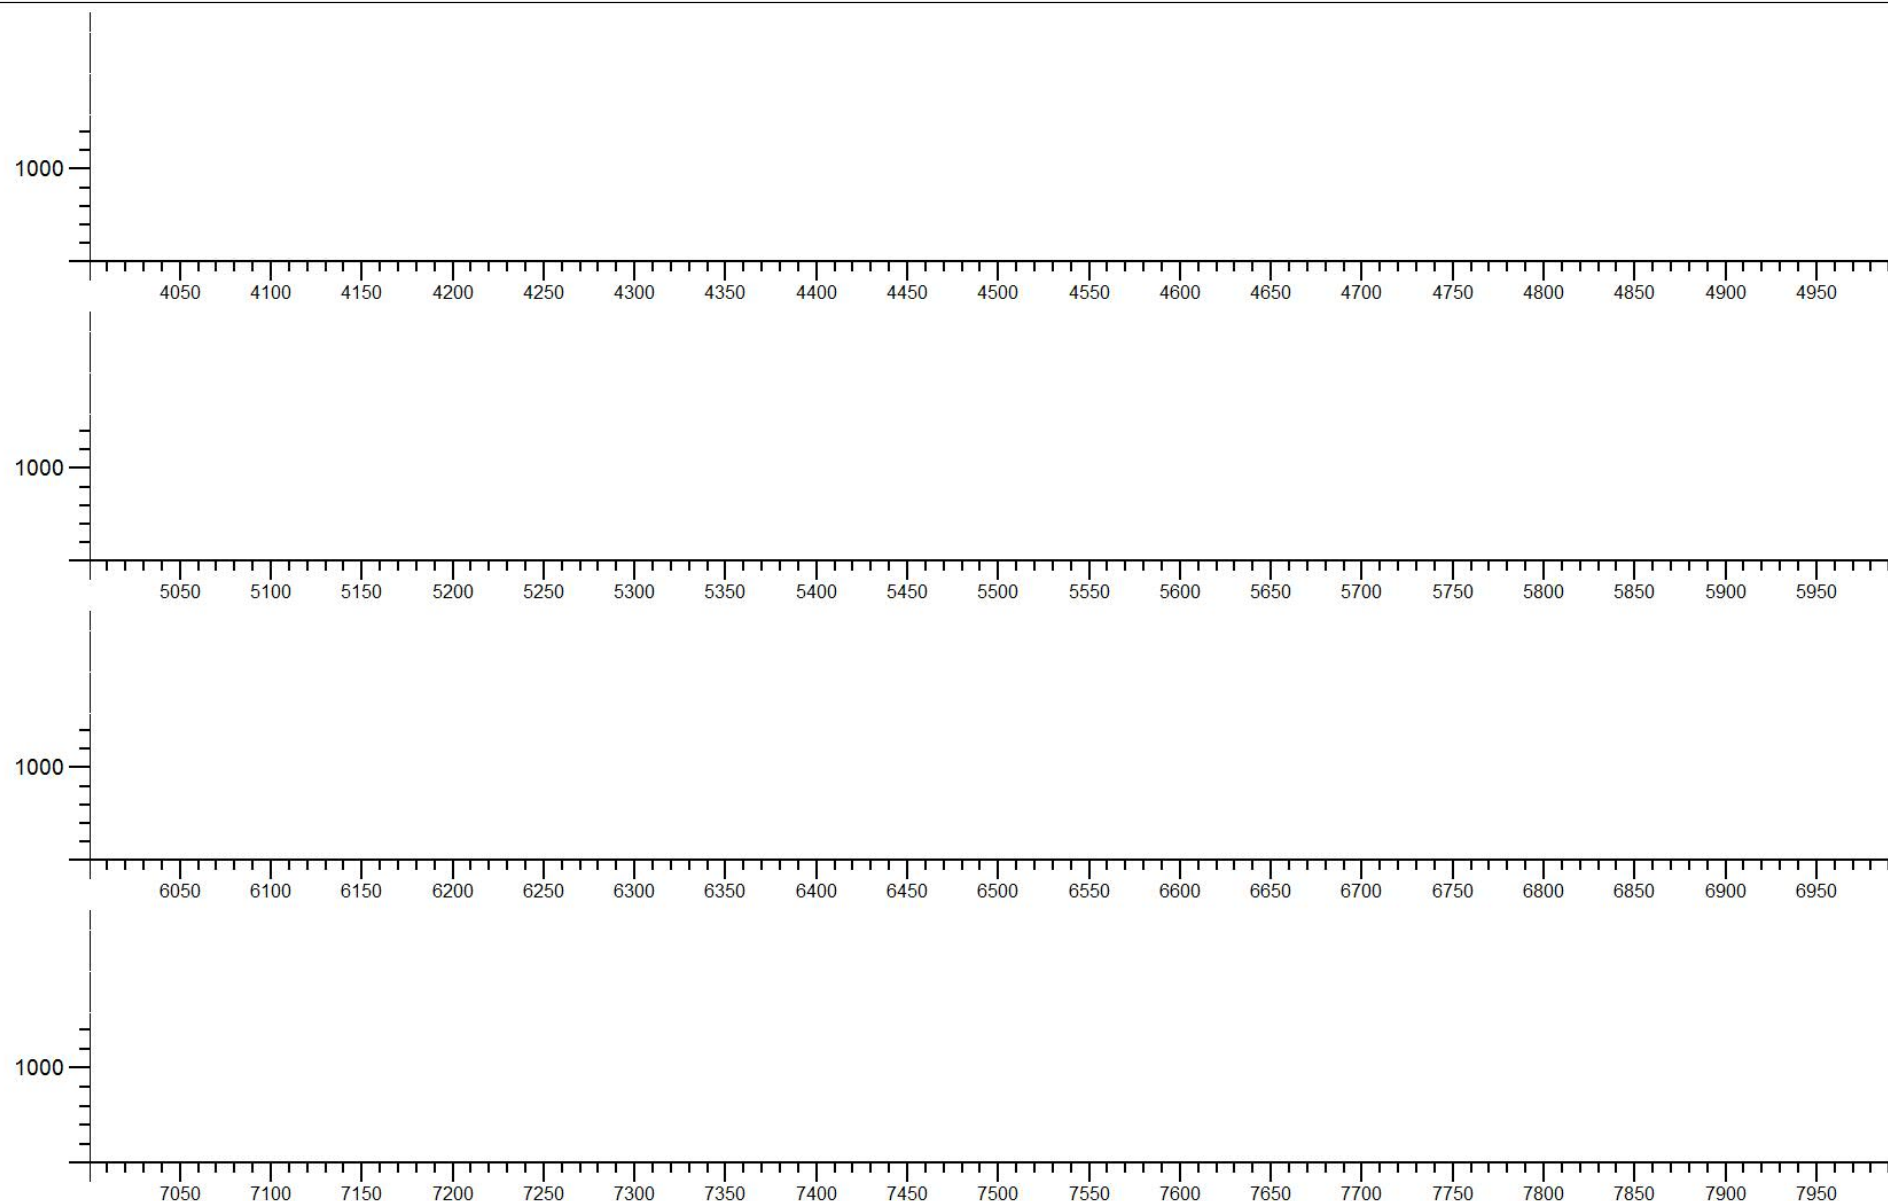

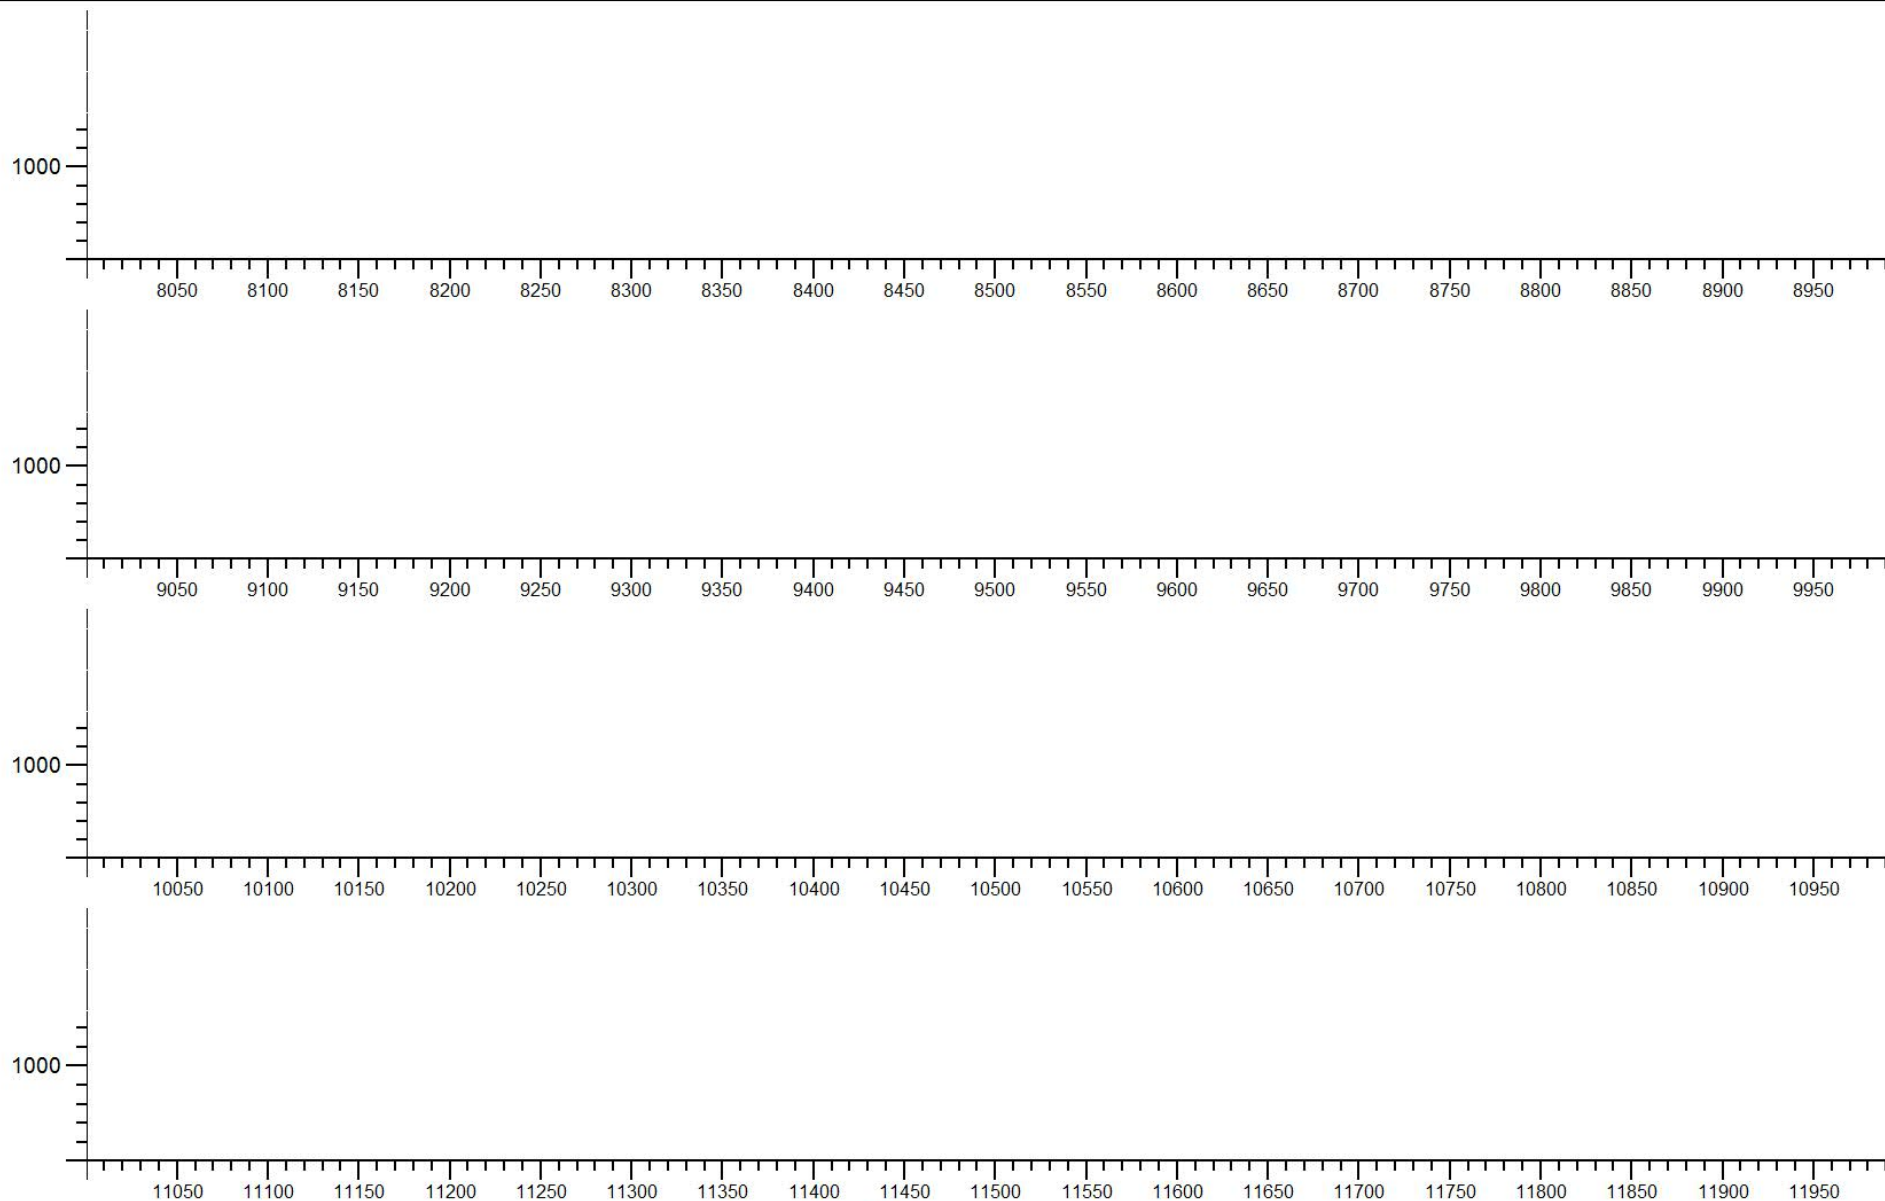

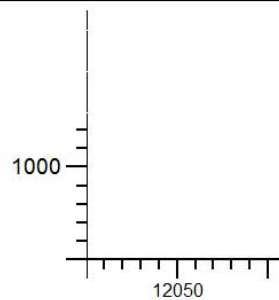

Supplement: raw_material.zip [file raw_material.zip]

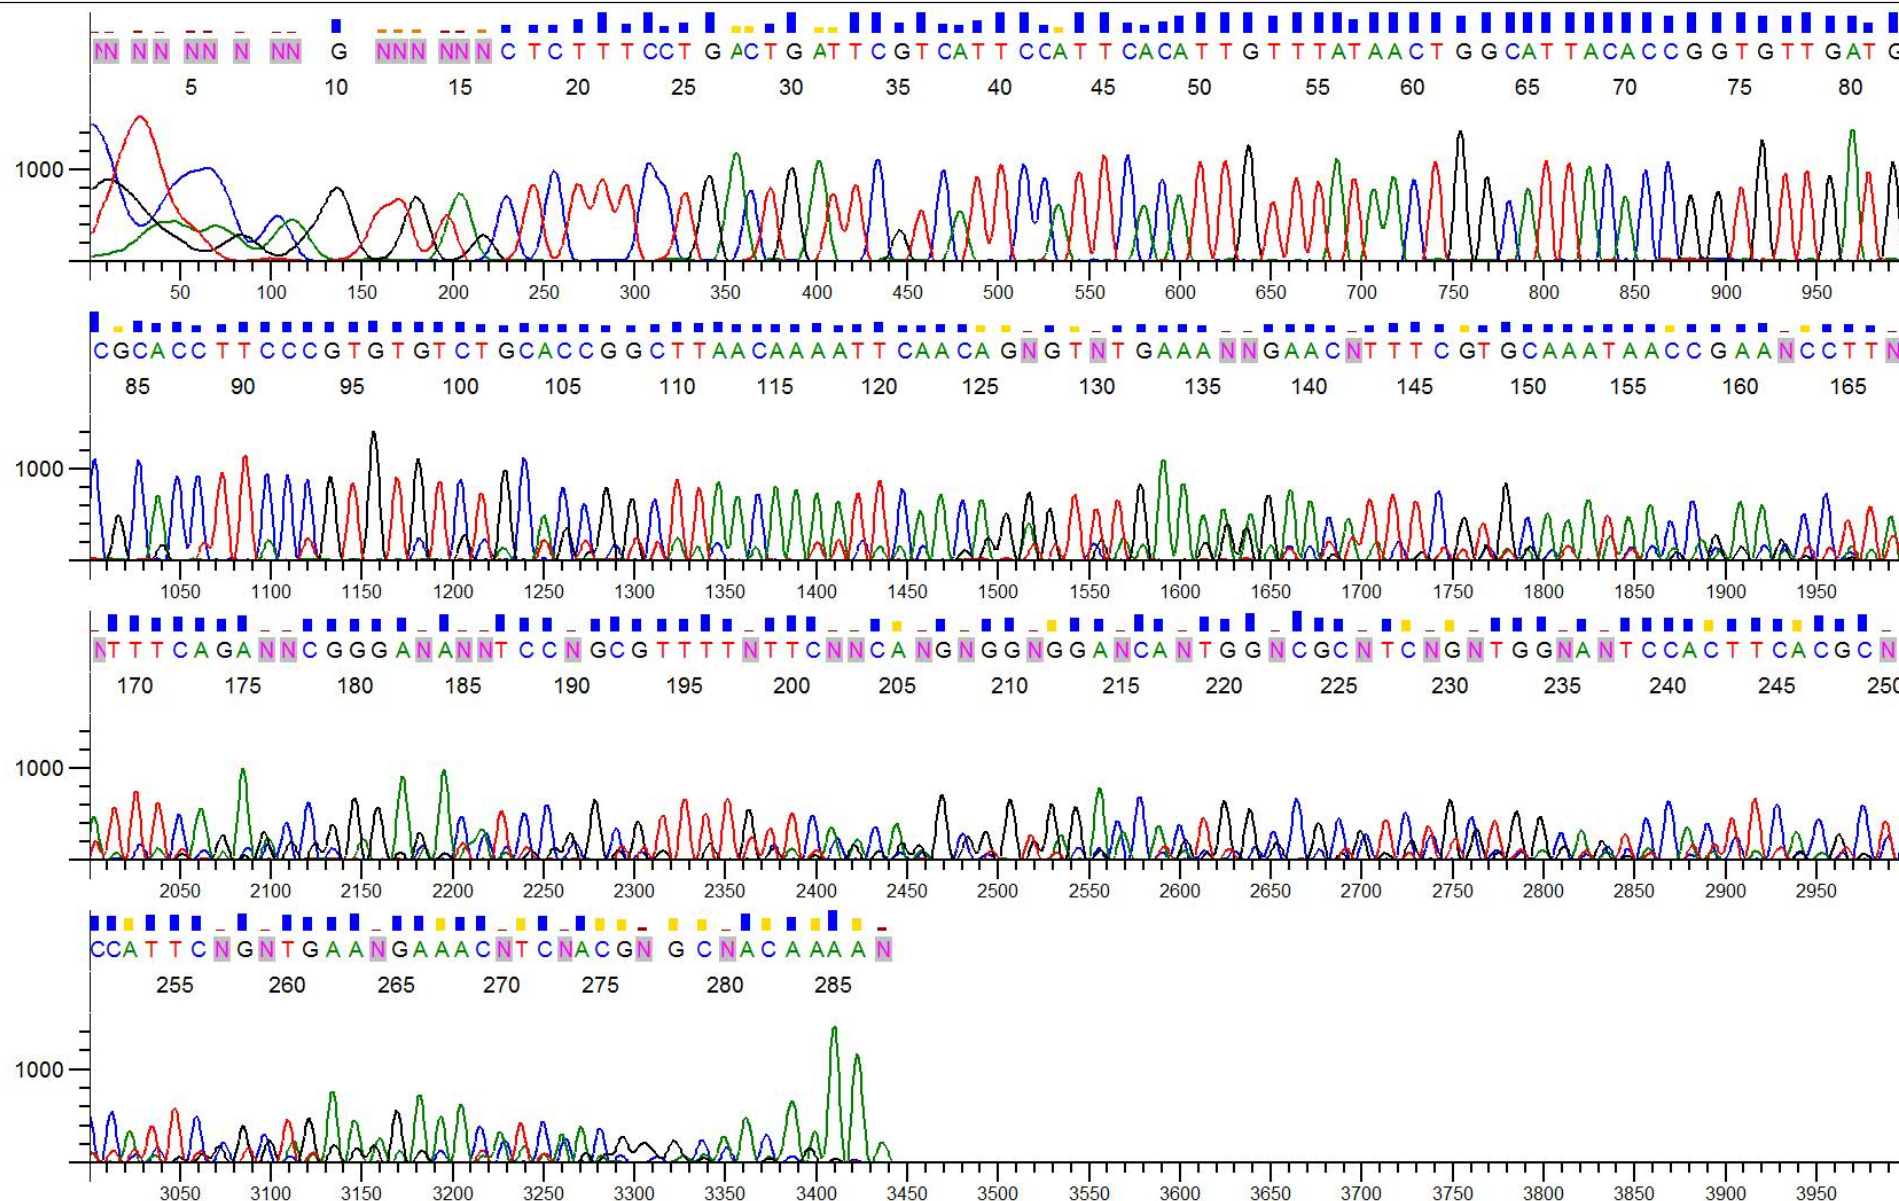

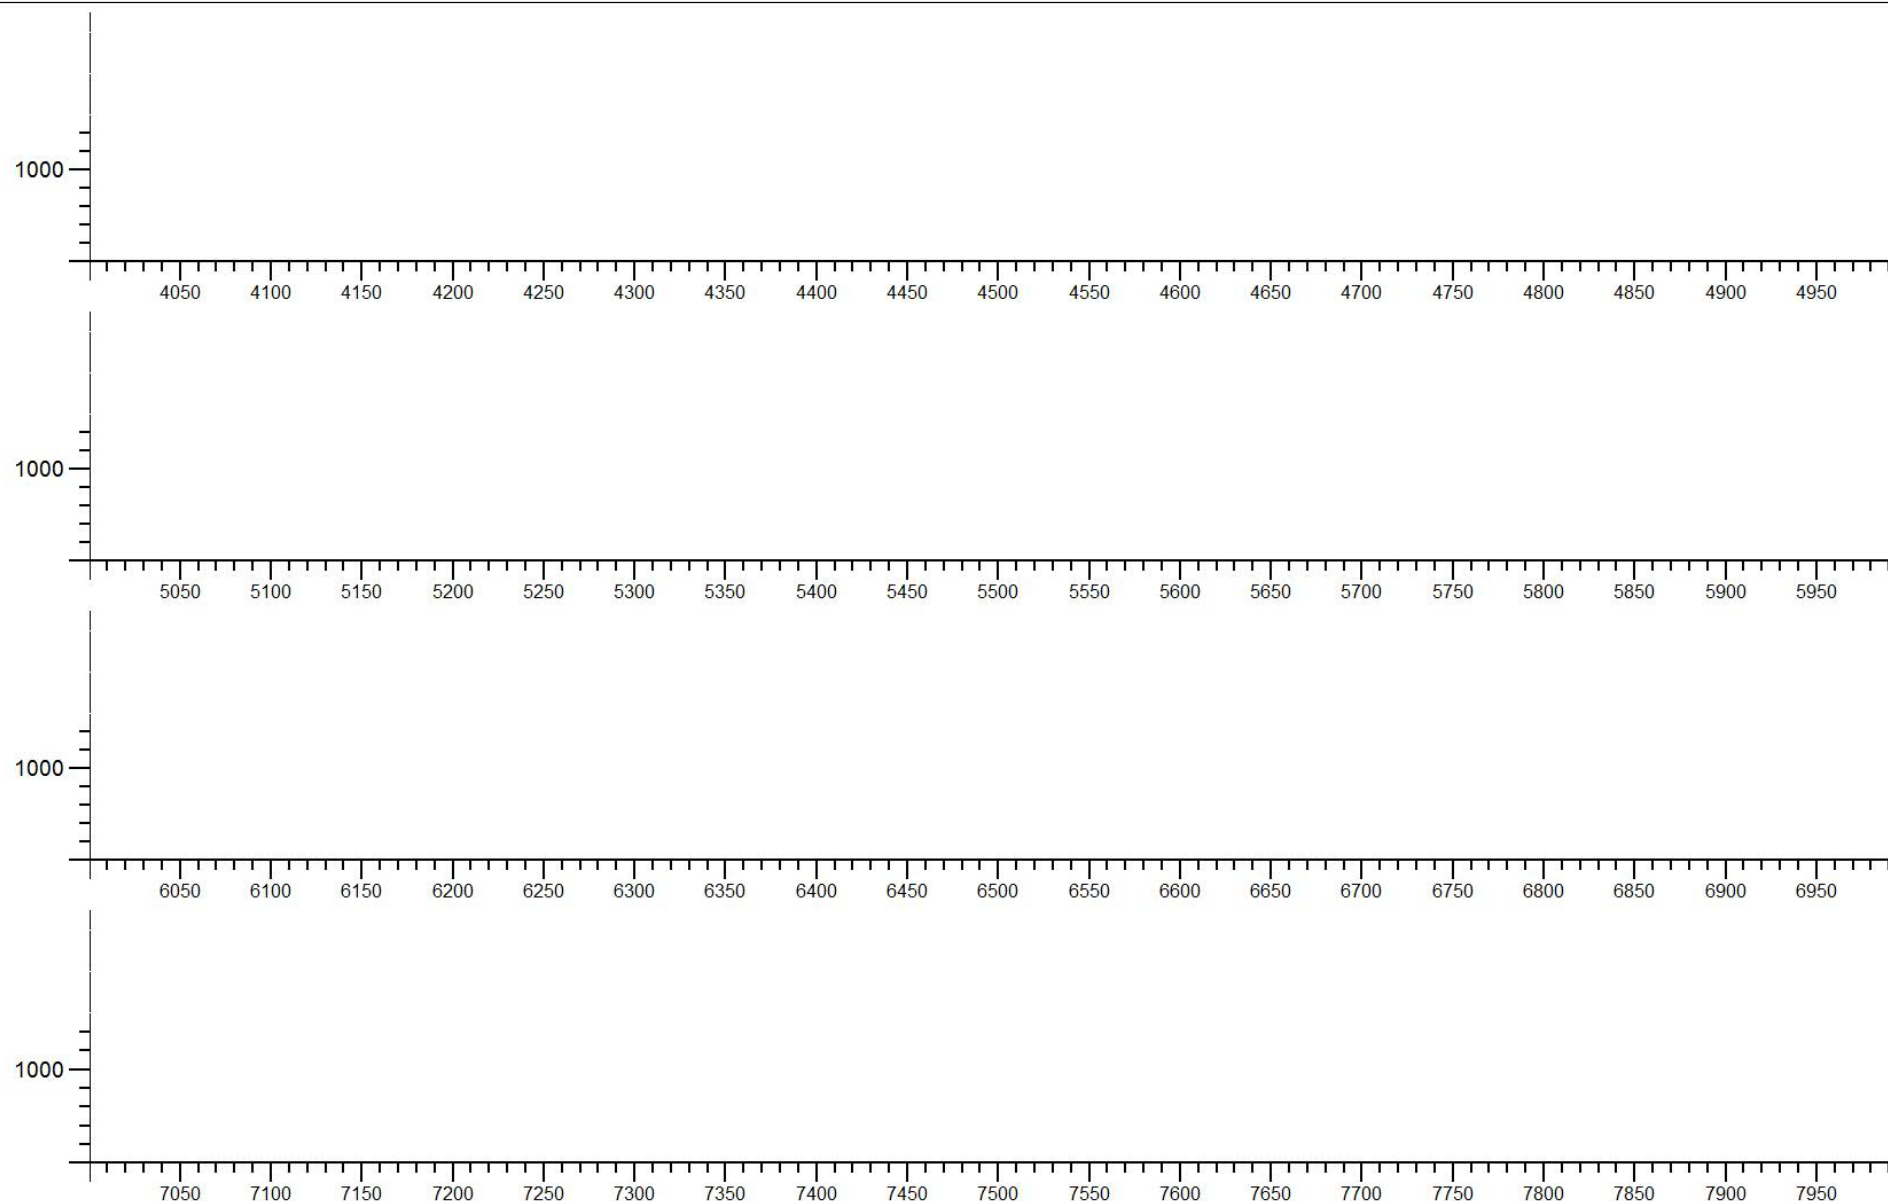

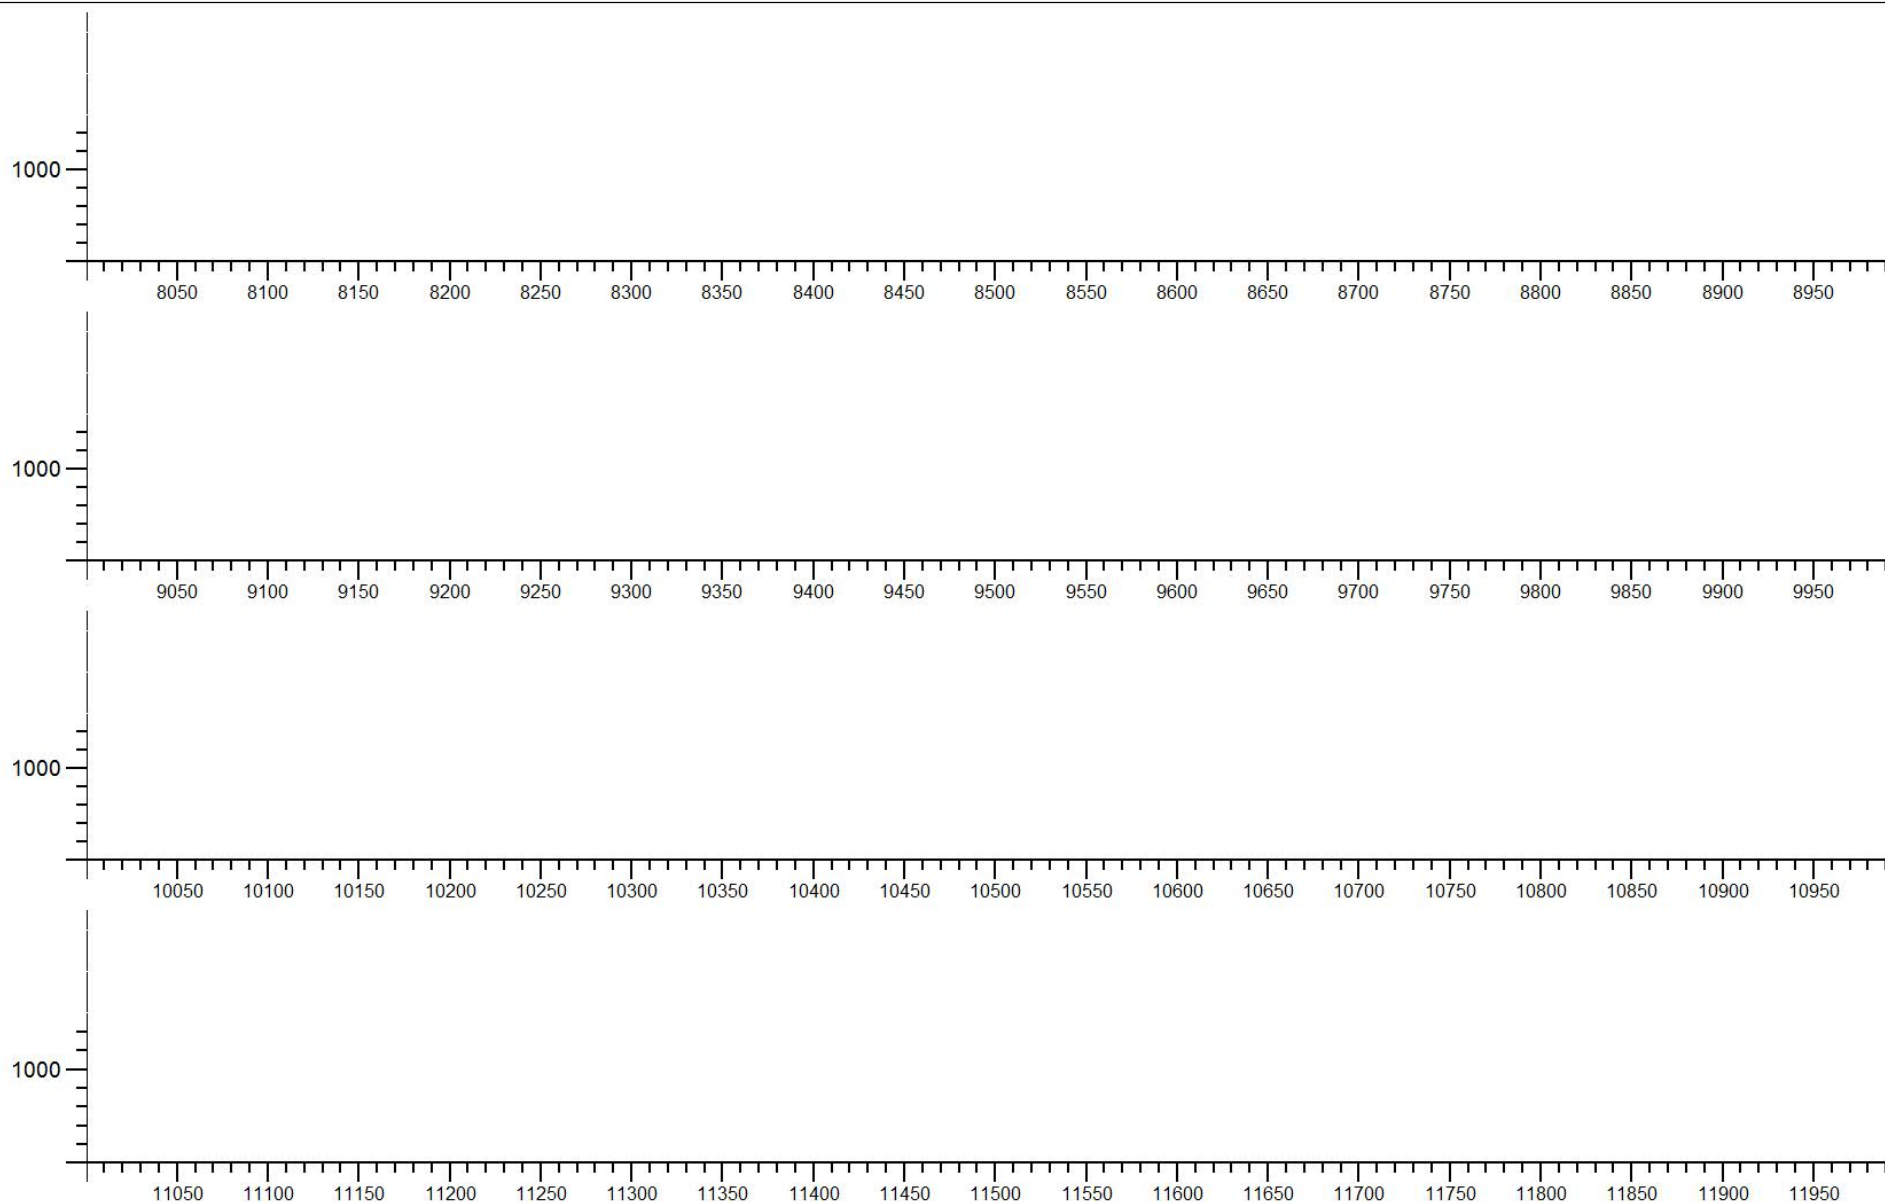

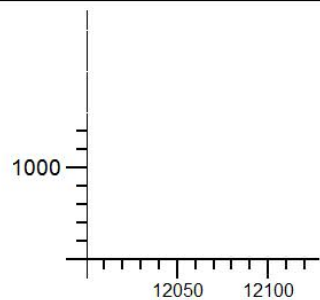

Supplement: raw_material.zip [file raw_material.zip]
